# Supplementary material for: Integrative Expression and Prognosis Analysis of DHX37 in Human Cancers by Data Mining
Source: Biomed Res Int. 2021 Jan 2;2021:6576210. doi: 10.1155/2021/6576210 (PMC7801084; doi:10.1155/2021/6576210)
Supplement: Supplementary Materials — Detailed information of the gene expression in various cancers that associated with DHX37 were listed in Supplementary 1, which will be available online. [file 6576210.f1.txt]

Table1.CRC
id_a	pretty_label_a	datatype_a	chr_a	start_a	end_a	id_b	pretty_label_b	datatype_b	chr_b	start_b	end_b	link_distance	adj_logged_pvalue	logged_pvalue	correlation	num_nonna
N:GEXP:DDX54:chr12:113594979:113623284:-:79039	DDX54	GEXP	12	113594979	113623284	N:GEXP:DHX37:chr12:125431371:125473668:-:57647	DHX37	GEXP	12	125431371	125473668	11808087	94.4	102.5	0.75	563
N:GEXP:DDX51:chr12:132621139:132628880:-:317781	DDX51	GEXP	12	132621139	132628880	N:GEXP:DHX37:chr12:125431371:125473668:-:57647	DHX37	GEXP	12	125431371	125473668	7147471	66.2	74.3	0.67	563
N:GEXP:DHX37:chr12:125431371:125473668:-:57647	DHX37	GEXP	12	125431371	125473668	N:GEXP:PUS1:chr12:132413745:132428406:+:80324	PUS1	GEXP	12	132413745	132428406	6940077	65.2	73.3	0.67	563
N:GEXP:DHX37:chr12:125431371:125473668:-:57647	DHX37	GEXP	12	125431371	125473668	N:GEXP:GCN1L1:chr12:120565007:120632513:-:10985	GCN1L1	GEXP	12	120565007	120632513	4798858	64.6	72.7	0.67	563
N:GEXP:CAD:chr2:27440258:27466811:+:790	CAD	GEXP	2	27440258	27466811	N:GEXP:DHX37:chr12:125431371:125473668:-:57647	DHX37	GEXP	12	125431371	125473668	500000000	55.4	63.5	0.63	563
N:GEXP:DHX37:chr12:125431371:125473668:-:57647	DHX37	GEXP	12	125431371	125473668	N:GEXP:FASN:chr17:80036214:80056208:-:2194	FASN	GEXP	17	80036214	80056208	500000000	54	62.1	0.63	563
N:GEXP:DHX37:chr12:125431371:125473668:-:57647	DHX37	GEXP	12	125431371	125473668	N:GEXP:LONP1:chr19:5691845:5720583:-:9361	LONP1	GEXP	19	5691845	5720583	500000000	47.7	55.8	0.6	563
N:GEXP:CHERP:chr19:16628700:16653341:-:10523	CHERP	GEXP	19	16628700	16653341	N:GEXP:DHX37:chr12:125431371:125473668:-:57647	DHX37	GEXP	12	125431371	125473668	500000000	47.4	55.5	0.6	563
N:GEXP:DHX37:chr12:125431371:125473668:-:57647	DHX37	GEXP	12	125431371	125473668	N:GEXP:RBM10:chrX:47004268:47046212:+:8241	RBM10	GEXP	X	47004268	47046212	500000000	47.4	55.4	0.6	563
N:GEXP:DHX37:chr12:125431371:125473668:-:57647	DHX37	GEXP	12	125431371	125473668	N:GEXP:HCFC1:chrX:153213004:153237258:-:3054	HCFC1	GEXP	X	153213004	153237258	500000000	46.3	54.4	0.59	563
N:GEXP:DHX37:chr12:125431371:125473668:-:57647	DHX37	GEXP	12	125431371	125473668	N:GEXP:TRIM28:chr19:59055458:59062089:+:10155	TRIM28	GEXP	19	59055458	59062089	500000000	45.8	53.8	0.59	563
N:GEXP:CALM2:chr2:47387221:47403740:-:805	CALM2	GEXP	2	47387221	47403740	N:GEXP:DHX37:chr12:125431371:125473668:-:57647	DHX37	GEXP	12	125431371	125473668	500000000	45.5	53.6	-0.59	563
N:GEXP:DHX37:chr12:125431371:125473668:-:57647	DHX37	GEXP	12	125431371	125473668	N:GEXP:RRP12:chr10:99116115:99161127:-:23223	RRP12	GEXP	10	99116115	99161127	500000000	45.3	53.4	0.59	563
N:GEXP:DHX37:chr12:125431371:125473668:-:57647	DHX37	GEXP	12	125431371	125473668	N:GEXP:SMARCA4:chr19:11071598:11176071:+:6597	SMARCA4	GEXP	19	11071598	11176071	500000000	45.3	53.4	0.59	563
N:GEXP:DHX37:chr12:125431371:125473668:-:57647	DHX37	GEXP	12	125431371	125473668	N:GEXP:RBM19:chr12:114254543:114404176:-:9904	RBM19	GEXP	12	114254543	114404176	11027195	44.9	52.9	0.59	563
N:GEXP:DHX37:chr12:125431371:125473668:-:57647	DHX37	GEXP	12	125431371	125473668	N:GEXP:SYMPK:chr19:46318668:46366548:-:8189	SYMPK	GEXP	19	46318668	46366548	500000000	44.7	52.8	0.59	563
N:GEXP:DHX37:chr12:125431371:125473668:-:57647	DHX37	GEXP	12	125431371	125473668	N:GEXP:KIAA0664:chr17:2592680:2614927:-:23277	KIAA0664	GEXP	17	2592680	2614927	500000000	44.3	52.3	0.59	563
N:GEXP:DHX37:chr12:125431371:125473668:-:57647	DHX37	GEXP	12	125431371	125473668	N:GEXP:KDM2B:chr12:121866900:122018920:-:84678	KDM2B	GEXP	12	121866900	122018920	3412451	44	52	0.58	563
N:GEXP:DHX37:chr12:125431371:125473668:-:57647	DHX37	GEXP	12	125431371	125473668	N:GEXP:POLE:chr12:133200348:133263951:-:5426	POLE	GEXP	12	133200348	133263951	7726680	43.5	51.6	0.58	563
N:GEXP:DHX37:chr12:125431371:125473668:-:57647	DHX37	GEXP	12	125431371	125473668	N:GEXP:RPTOR:chr17:78518619:78940171:+:57521	RPTOR	GEXP	17	78518619	78940171	500000000	43.5	51.5	0.58	563
N:GEXP:DHX37:chr12:125431371:125473668:-:57647	DHX37	GEXP	12	125431371	125473668	N:GEXP:RAB18:chr10:27793197:27831143:+:22931	RAB18	GEXP	10	27793197	27831143	500000000	42.8	50.9	-0.58	563
N:GEXP:DHX37:chr12:125431371:125473668:-:57647	DHX37	GEXP	12	125431371	125473668	N:GEXP:YPEL5:chr2:30369807:30383399:+:51646	YPEL5	GEXP	2	30369807	30383399	500000000	42.5	50.6	-0.58	563
N:GEXP:DHX37:chr12:125431371:125473668:-:57647	DHX37	GEXP	12	125431371	125473668	N:GEXP:NCOR2:chr12:124808961:125052135:-:9612	NCOR2	GEXP	12	124808961	125052135	379236	42.5	50.5	0.58	563
N:GEXP:DHX37:chr12:125431371:125473668:-:57647	DHX37	GEXP	12	125431371	125473668	N:GEXP:HNF1A:chr12:121416346:121440315:+:6927	HNF1A	GEXP	12	121416346	121440315	3991056	42.1	50.1	0.58	563
N:GEXP:DHX37:chr12:125431371:125473668:-:57647	DHX37	GEXP	12	125431371	125473668	N:GEXP:PPAN:chr19:10216965:10225414:+:56342	PPAN	GEXP	19	10216965	10225414	500000000	41.7	49.7	0.57	563
N:GEXP:DHX37:chr12:125431371:125473668:-:57647	DHX37	GEXP	12	125431371	125473668	N:GEXP:U2AF2:chr19:56165512:56186081:+:11338	U2AF2	GEXP	19	56165512	56186081	500000000	41.2	49.3	0.57	563
N:GEXP:DHX37:chr12:125431371:125473668:-:57647	DHX37	GEXP	12	125431371	125473668	N:GEXP:NOC4L:chr12:132628993:132637013:+:79050	NOC4L	GEXP	12	132628993	132637013	7155325	41.1	49.2	0.57	563
N:GEXP:CLDND1:chr3:98216756:98241910:-:56650	CLDND1	GEXP	3	98216756	98241910	N:GEXP:DHX37:chr12:125431371:125473668:-:57647	DHX37	GEXP	12	125431371	125473668	500000000	40.5	48.5	-0.57	563
N:GEXP:DHX37:chr12:125431371:125473668:-:57647	DHX37	GEXP	12	125431371	125473668	N:GEXP:SETD1A:chr16:30968615:30996437:+:9739	SETD1A	GEXP	16	30968615	30996437	500000000	40.1	48.1	0.57	563
N:GEXP:DHX37:chr12:125431371:125473668:-:57647	DHX37	GEXP	12	125431371	125473668	N:GEXP:SLC35A5:chr3:112280556:112304424:+:55032	SLC35A5	GEXP	3	112280556	112304424	500000000	39.9	47.9	-0.56	563
N:GEXP:DHX37:chr12:125431371:125473668:-:57647	DHX37	GEXP	12	125431371	125473668	N:GEXP:INTS1:chr7:1509913:1545489:-:26173	INTS1	GEXP	7	1509913	1545489	500000000	39.1	47.2	0.56	563
N:GEXP:DHX37:chr12:125431371:125473668:-:57647	DHX37	GEXP	12	125431371	125473668	N:GEXP:TOMM40:chr19:45393826:45406946:+:10452	TOMM40	GEXP	19	45393826	45406946	500000000	39.1	47.2	0.56	563
N:GEXP:DHX37:chr12:125431371:125473668:-:57647	DHX37	GEXP	12	125431371	125473668	N:GEXP:EHMT2:chr6:31847536:31865464:-:10919	EHMT2	GEXP	6	31847536	31865464	500000000	38.7	46.8	0.56	563
N:GEXP:DHX37:chr12:125431371:125473668:-:57647	DHX37	GEXP	12	125431371	125473668	N:GEXP:TMEM59:chr1:54497347:54519177:-:9528	TMEM59	GEXP	1	54497347	54519177	500000000	38.4	46.4	-0.56	563
N:GEXP:DHX37:chr12:125431371:125473668:-:57647	DHX37	GEXP	12	125431371	125473668	N:GEXP:FBXO8:chr4:175157809:175205415:-:26269	FBXO8	GEXP	4	175157809	175205415	500000000	37.9	45.9	-0.55	563
N:GEXP:DHX37:chr12:125431371:125473668:-:57647	DHX37	GEXP	12	125431371	125473668	N:GEXP:HNRNPM:chr19:8509651:8553998:+:4670	HNRNPM	GEXP	19	8509651	8553998	500000000	37.6	45.7	0.55	563
N:GEXP:CNEP1R1:chr16:50059189:50070999:+:255919	CNEP1R1	GEXP	16	50059189	50070999	N:GEXP:DHX37:chr12:125431371:125473668:-:57647	DHX37	GEXP	12	125431371	125473668	500000000	37.4	45.5	-0.55	563
N:GEXP:DHX37:chr12:125431371:125473668:-:57647	DHX37	GEXP	12	125431371	125473668	N:GEXP:LMNB2:chr19:2427636:2456994:-:84823	LMNB2	GEXP	19	2427636	2456994	500000000	37.1	45.2	0.55	563
N:GEXP:DHX37:chr12:125431371:125473668:-:57647	DHX37	GEXP	12	125431371	125473668	N:GEXP:SCARB1:chr12:125261402:125367214:-:949	SCARB1	GEXP	12	125261402	125367214	64157	37.1	45.2	0.55	563
N:GEXP:DHX37:chr12:125431371:125473668:-:57647	DHX37	GEXP	12	125431371	125473668	N:GEXP:EP400:chr12:132434508:132565005:+:57634	EP400	GEXP	12	132434508	132565005	6960840	36.7	44.8	0.55	563
N:GEXP:DHX37:chr12:125431371:125473668:-:57647	DHX37	GEXP	12	125431371	125473668	N:GEXP:ZNF142:chr2:219502639:219524378:-:7701	ZNF142	GEXP	2	219502639	219524378	500000000	36.7	44.8	0.55	563
N:GEXP:DHX37:chr12:125431371:125473668:-:57647	DHX37	GEXP	12	125431371	125473668	N:GEXP:POLRMT:chr19:617223:633597:-:5442	POLRMT	GEXP	19	617223	633597	500000000	36.6	44.7	0.55	563
N:GEXP:C6orf72:chr6:149887528:149912067:+:116254	C6orf72	GEXP	6	149887528	149912067	N:GEXP:DHX37:chr12:125431371:125473668:-:57647	DHX37	GEXP	12	125431371	125473668	500000000	36.5	44.6	-0.55	563
N:GEXP:DHX37:chr12:125431371:125473668:-:57647	DHX37	GEXP	12	125431371	125473668	N:GEXP:SRRT:chr7:100472733:100486285:+:51593	SRRT	GEXP	7	100472733	100486285	500000000	36.5	44.6	0.55	563
N:GEXP:CHMP5:chr9:33264940:33281977:+:51510	CHMP5	GEXP	9	33264940	33281977	N:GEXP:DHX37:chr12:125431371:125473668:-:57647	DHX37	GEXP	12	125431371	125473668	500000000	36.4	44.4	-0.55	563
N:GEXP:DHX37:chr12:125431371:125473668:-:57647	DHX37	GEXP	12	125431371	125473668	N:GEXP:PTCD1:chr7:99014362:99063787:-:26024	PTCD1	GEXP	7	99014362	99063787	500000000	36.3	44.3	0.55	563
N:GEXP:DHX37:chr12:125431371:125473668:-:57647	DHX37	GEXP	12	125431371	125473668	N:GEXP:ZNF574:chr19:42572629:42585701:+:64763	ZNF574	GEXP	19	42572629	42585701	500000000	36.2	44.3	0.55	563
N:GEXP:DHX37:chr12:125431371:125473668:-:57647	DHX37	GEXP	12	125431371	125473668	N:GEXP:MYBBP1A:chr17:4442192:4458926:-:10514	MYBBP1A	GEXP	17	4442192	4458926	500000000	36.1	44.1	0.54	563
N:GEXP:DHX37:chr12:125431371:125473668:-:57647	DHX37	GEXP	12	125431371	125473668	N:GEXP:GABARAPL2:chr16:75600249:75611779:+:11345	GABARAPL2	GEXP	16	75600249	75611779	500000000	36	44.1	-0.54	563
N:GEXP:C19orf29:chr19:3610627:3626813:-:58509	C19orf29	GEXP	19	3610627	3626813	N:GEXP:DHX37:chr12:125431371:125473668:-:57647	DHX37	GEXP	12	125431371	125473668	500000000	36	44.1	0.54	563
N:GEXP:DHX37:chr12:125431371:125473668:-:57647	DHX37	GEXP	12	125431371	125473668	N:GEXP:FBXL5:chr4:15606162:15683302:-:26234	FBXL5	GEXP	4	15606162	15683302	500000000	35.9	44	-0.54	563
N:GEXP:DHX37:chr12:125431371:125473668:-:57647	DHX37	GEXP	12	125431371	125473668	N:GEXP:PHRF1:chr11:576486:612222:+:57661	PHRF1	GEXP	11	576486	612222	500000000	35.9	44	0.54	563
N:GEXP:CTBS:chr1:85015289:85040163:-:1486	CTBS	GEXP	1	85015289	85040163	N:GEXP:DHX37:chr12:125431371:125473668:-:57647	DHX37	GEXP	12	125431371	125473668	500000000	35.8	43.9	-0.54	563
N:GEXP:DHX37:chr12:125431371:125473668:-:57647	DHX37	GEXP	12	125431371	125473668	N:GEXP:UBE2O:chr17:74385532:74449288:-:63893	UBE2O	GEXP	17	74385532	74449288	500000000	35.7	43.8	0.54	563
N:GEXP:DHX37:chr12:125431371:125473668:-:57647	DHX37	GEXP	12	125431371	125473668	N:GEXP:PPP3CB:chr10:75196186:75255782:-:5532	PPP3CB	GEXP	10	75196186	75255782	500000000	35.7	43.8	-0.54	563
N:GEXP:DHX37:chr12:125431371:125473668:-:57647	DHX37	GEXP	12	125431371	125473668	N:GEXP:GNG10:chr9:114423615:114432526:+:2790	GNG10	GEXP	9	114423615	114432526	500000000	35.4	43.5	-0.54	563
N:GEXP:ACTR10:chr14:58666798:58701750:+:55860	ACTR10	GEXP	14	58666798	58701750	N:GEXP:DHX37:chr12:125431371:125473668:-:57647	DHX37	GEXP	12	125431371	125473668	500000000	35.4	43.5	-0.54	563
N:GEXP:ARF4:chr3:57557090:57583947:-:378	ARF4	GEXP	3	57557090	57583947	N:GEXP:DHX37:chr12:125431371:125473668:-:57647	DHX37	GEXP	12	125431371	125473668	500000000	35.2	43.3	-0.54	563
N:CNVR:12q21.32:chr12:88360000:88360999::	chr12:88,360,000-88,360,999 (100kb, 12q21.32)	CNVR	12	88360000	88360999	N:GEXP:DHX37:chr12:125431371:125473668:-:57647	DHX37	GEXP	12	125431371	125473668	37070372	6.8	14.5	0.33	553
N:CNVR:12q21.33:chr12:89433000:89433999::	chr12:89,433,000-89,433,999 (100kb, 12q21.33)	CNVR	12	89433000	89433999	N:GEXP:DHX37:chr12:125431371:125473668:-:57647	DHX37	GEXP	12	125431371	125473668	35997372	6.2	14	0.32	553
N:CNVR:12q24:chr12:114192000:116873999::	chr12:114,192,000-116,873,999 (3bp, 12q24)	CNVR	12	114192000	116873999	N:GEXP:DHX37:chr12:125431371:125473668:-:57647	DHX37	GEXP	12	125431371	125473668	8557372	6.2	13.9	0.32	553
N:CNVR:12q24.32:chr12:126127000:126127999::	chr12:126,127,000-126,127,999 (100kb, 12q24.32)	CNVR	12	126127000	126127999	N:GEXP:DHX37:chr12:125431371:125473668:-:57647	DHX37	GEXP	12	125431371	125473668	653332	5.9	13.7	0.32	553
N:CNVR:12q21.3:chr12:88361000:89432999::	chr12:88,361,000-89,432,999 (1bp, 12q21.3)	CNVR	12	88361000	89432999	N:GEXP:DHX37:chr12:125431371:125473668:-:57647	DHX37	GEXP	12	125431371	125473668	35998372	6	13.7	0.32	553
N:CNVR:12q24.32:chr12:126150000:126798999::	chr12:126,150,000-126,798,999 (649Mb, 12q24.32)	CNVR	12	126150000	126798999	N:GEXP:DHX37:chr12:125431371:125473668:-:57647	DHX37	GEXP	12	125431371	125473668	676332	5.9	13.7	0.32	553
N:CNVR:12q24.32:chr12:126128000:126149999::	chr12:126,128,000-126,149,999 (22Mb, 12q24.32)	CNVR	12	126128000	126149999	N:GEXP:DHX37:chr12:125431371:125473668:-:57647	DHX37	GEXP	12	125431371	125473668	654332	5.9	13.6	0.32	553
N:CNVR:12q21.33:chr12:91448000:93147999::	chr12:91,448,000-93,147,999 (2bp, 12q21.33)	CNVR	12	91448000	93147999	N:GEXP:DHX37:chr12:125431371:125473668:-:57647	DHX37	GEXP	12	125431371	125473668	32283372	5.8	13.5	0.32	553
N:CNVR:12q24.3:chr12:121125000:126126999::	chr12:121,125,000-126,126,999 (5bp, 12q24.3)	CNVR	12	121125000	126126999	N:GEXP:DHX37:chr12:125431371:125473668:-:57647	DHX37	GEXP	12	125431371	125473668	0	5.6	13.4	0.31	553
N:CNVR:12q22:chr12:94559000:94560999::	chr12:94,559,000-94,560,999 (2Mb, 12q22)	CNVR	12	94559000	94560999	N:GEXP:DHX37:chr12:125431371:125473668:-:57647	DHX37	GEXP	12	125431371	125473668	30870372	5.7	13.4	0.31	553
N:CNVR:12q21.3:chr12:85750000:88359999::	chr12:85,750,000-88,359,999 (3bp, 12q21.3)	CNVR	12	85750000	88359999	N:GEXP:DHX37:chr12:125431371:125473668:-:57647	DHX37	GEXP	12	125431371	125473668	37071372	5.5	13.3	0.31	553
N:CNVR:12q22:chr12:93148000:94558999::	chr12:93,148,000-94,558,999 (1bp, 12q22)	CNVR	12	93148000	94558999	N:GEXP:DHX37:chr12:125431371:125473668:-:57647	DHX37	GEXP	12	125431371	125473668	30872372	5.6	13.3	0.31	553
N:CNVR:12q23.3:chr12:107058000:107059999::	chr12:107,058,000-107,059,999 (2Mb, 12q23.3)	CNVR	12	107058000	107059999	N:GEXP:DHX37:chr12:125431371:125473668:-:57647	DHX37	GEXP	12	125431371	125473668	18371372	5.4	13.2	0.31	553
N:CNVR:12q24.33:chr12:131571000:131874999::	chr12:131,571,000-131,874,999 (304Mb, 12q24.33)	CNVR	12	131571000	131874999	N:GEXP:DHX37:chr12:125431371:125473668:-:57647	DHX37	GEXP	12	125431371	125473668	6097332	5.4	13.2	0.31	553
N:CNVR:12q24.22:chr12:116874000:116874999::	chr12:116,874,000-116,874,999 (100kb, 12q24.22)	CNVR	12	116874000	116874999	N:GEXP:DHX37:chr12:125431371:125473668:-:57647	DHX37	GEXP	12	125431371	125473668	8556372	5.4	13.2	0.31	553
N:CNVR:12q23.3:chr12:104848000:107057999::	chr12:104,848,000-107,057,999 (2bp, 12q23.3)	CNVR	12	104848000	107057999	N:GEXP:DHX37:chr12:125431371:125473668:-:57647	DHX37	GEXP	12	125431371	125473668	18373372	5.3	13.1	0.31	553
N:CNVR:12q23.1:chr12:94561000:99810999::	chr12:94,561,000-99,810,999 (5bp, 12q23.1)	CNVR	12	94561000	99810999	N:GEXP:DHX37:chr12:125431371:125473668:-:57647	DHX37	GEXP	12	125431371	125473668	25620372	5.3	13.1	0.31	553
N:CNVR:12q21.33:chr12:89434000:91444999::	chr12:89,434,000-91,444,999 (2bp, 12q21.33)	CNVR	12	89434000	91444999	N:GEXP:DHX37:chr12:125431371:125473668:-:57647	DHX37	GEXP	12	125431371	125473668	33986372	5.3	13	0.31	553
N:CNVR:12q21.33:chr12:91445000:91447999::	chr12:91,445,000-91,447,999 (3Mb, 12q21.33)	CNVR	12	91445000	91447999	N:GEXP:DHX37:chr12:125431371:125473668:-:57647	DHX37	GEXP	12	125431371	125473668	33983372	5.3	13	0.31	553
N:CNVR:12q24:chr12:120230000:121123999::	chr12:120,230,000-121,123,999 (894Mb, 12q24)	CNVR	12	120230000	121123999	N:GEXP:DHX37:chr12:125431371:125473668:-:57647	DHX37	GEXP	12	125431371	125473668	4307372	5.2	12.9	0.31	553
N:CNVR:12q24.33:chr12:131513000:131513999::	chr12:131,513,000-131,513,999 (100kb, 12q24.33)	CNVR	12	131513000	131513999	N:GEXP:DHX37:chr12:125431371:125473668:-:57647	DHX37	GEXP	12	125431371	125473668	6039332	5.1	12.8	0.31	553
N:CNVR:12q24.31:chr12:121124000:121124999::	chr12:121,124,000-121,124,999 (100kb, 12q24.31)	CNVR	12	121124000	121124999	N:GEXP:DHX37:chr12:125431371:125473668:-:57647	DHX37	GEXP	12	125431371	125473668	4306372	5.1	12.8	0.31	553
N:CNVR:12q24.33:chr12:131887000:132280999::	chr12:131,887,000-132,280,999 (394Mb, 12q24.33)	CNVR	12	131887000	132280999	N:GEXP:DHX37:chr12:125431371:125473668:-:57647	DHX37	GEXP	12	125431371	125473668	6413332	5	12.8	0.31	553
N:CNVR:12q24.33:chr12:131570000:131570999::	chr12:131,570,000-131,570,999 (100kb, 12q24.33)	CNVR	12	131570000	131570999	N:GEXP:DHX37:chr12:125431371:125473668:-:57647	DHX37	GEXP	12	125431371	125473668	6096332	5	12.8	0.31	553
N:CNVR:12q24.2:chr12:116875000:120228999::	chr12:116,875,000-120,228,999 (3bp, 12q24.2)	CNVR	12	116875000	120228999	N:GEXP:DHX37:chr12:125431371:125473668:-:57647	DHX37	GEXP	12	125431371	125473668	5202372	5	12.8	0.31	553
N:CNVR:12q23.3:chr12:107060000:107228999::	chr12:107,060,000-107,228,999 (169Mb, 12q23.3)	CNVR	12	107060000	107228999	N:GEXP:DHX37:chr12:125431371:125473668:-:57647	DHX37	GEXP	12	125431371	125473668	18202372	5	12.8	0.31	553
N:CNVR:12q24.32:chr12:126800000:127372999::	chr12:126,800,000-127,372,999 (573Mb, 12q24.32)	CNVR	12	126800000	127372999	N:GEXP:DHX37:chr12:125431371:125473668:-:57647	DHX37	GEXP	12	125431371	125473668	1326332	5.1	12.8	0.31	553
N:CNVR:12q24.33:chr12:131514000:131569999::	chr12:131,514,000-131,569,999 (56Mb, 12q24.33)	CNVR	12	131514000	131569999	N:GEXP:DHX37:chr12:125431371:125473668:-:57647	DHX37	GEXP	12	125431371	125473668	6040332	5	12.8	0.31	553
N:CNVR:12q24.32:chr12:127374000:127493999::	chr12:127,374,000-127,493,999 (120Mb, 12q24.32)	CNVR	12	127374000	127493999	N:GEXP:DHX37:chr12:125431371:125473668:-:57647	DHX37	GEXP	12	125431371	125473668	1900332	4.9	12.7	0.31	553
N:CNVR:12q24.33:chr12:132291000:133161000::	chr12:132,291,000-133,161,000 (870Mb, 12q24.33)	CNVR	12	132291000	133161000	N:GEXP:DHX37:chr12:125431371:125473668:-:57647	DHX37	GEXP	12	125431371	125473668	6817332	4.8	12.6	0.3	553
N:CNVR:12q23.3:chr12:104847000:104847999::	chr12:104,847,000-104,847,999 (100kb, 12q23.3)	CNVR	12	104847000	104847999	N:GEXP:DHX37:chr12:125431371:125473668:-:57647	DHX37	GEXP	12	125431371	125473668	20583372	4.8	12.6	0.3	553
N:CNVR:12q24.11:chr12:107229000:114189999::	chr12:107,229,000-114,189,999 (7bp, 12q24.11)	CNVR	12	107229000	114189999	N:GEXP:DHX37:chr12:125431371:125473668:-:57647	DHX37	GEXP	12	125431371	125473668	11241372	4.8	12.5	0.3	553
N:CNVR:12q21.31:chr12:85113000:85114999::	chr12:85,113,000-85,114,999 (2Mb, 12q21.31)	CNVR	12	85113000	85114999	N:GEXP:DHX37:chr12:125431371:125473668:-:57647	DHX37	GEXP	12	125431371	125473668	40316372	4.4	12.2	0.3	553
N:CNVR:12q24.33:chr12:132281000:132290999::	chr12:132,281,000-132,290,999 (10Mb, 12q24.33)	CNVR	12	132281000	132290999	N:GEXP:DHX37:chr12:125431371:125473668:-:57647	DHX37	GEXP	12	125431371	125473668	6807332	4.4	12.2	0.3	553
N:CNVR:12q24.3:chr12:127494000:131512999::	chr12:127,494,000-131,512,999 (4bp, 12q24.3)	CNVR	12	127494000	131512999	N:GEXP:DHX37:chr12:125431371:125473668:-:57647	DHX37	GEXP	12	125431371	125473668	2020332	4.5	12.2	0.3	553
N:GEXP:DHX37:chr12:125431371:125473668:-:57647	DHX37	GEXP	12	125431371	125473668	N:MIRN:hsa-miR-106b-3p:chr7:99691616:99691697:+:MIMAT0004672	hsa-miR-106b-3p	MIRN	7	99691616	99691697	500000000	3.9	10.9	0.29	545
N:GEXP:DHX37:chr12:125431371:125473668:-:57647	DHX37	GEXP	12	125431371	125473668	N:MIRN:hsa-miR-1307-3p:chr10:105154010:105154158:+:MIMAT0005951	hsa-miR-1307-3p	MIRN	10	105154010	105154158	500000000	2.9	10	0.27	545
Table2.STAD
id_a	pretty_label_a	datatype_a	chr_a	start_a	end_a	id_b	pretty_label_b	datatype_b	chr_b	start_b	end_b	link_distance	adj_logged_pvalue	logged_pvalue	correlation	num_nonna
N:GEXP:DDX54:chr12:113594979:113623284:-:79039	DDX54	GEXP	12	113594979	113623284	N:GEXP:DHX37:chr12:125431371:125473668:-:57647	DHX37	GEXP	12	125431371	125473668	11808087	53.3	61.7	0.811	262
N:GEXP:DHX37:chr12:125431371:125473668:-:57647	DHX37	GEXP	12	125431371	125473668	N:GEXP:PUS1:chr12:132413745:132428406:+:80324	PUS1	GEXP	12	132413745	132428406	6940077	38.2	46.6	0.744	262
N:GEXP:DHX37:chr12:125431371:125473668:-:57647	DHX37	GEXP	12	125431371	125473668	N:GEXP:RRP12:chr10:99116115:99161127:-:23223	RRP12	GEXP	10	99116115	99161127	500000000	36.1	44.5	0.732	262
N:GEXP:DHX37:chr12:125431371:125473668:-:57647	DHX37	GEXP	12	125431371	125473668	N:GEXP:PGAM5:chr12:133287405:133299228:+:192111	PGAM5	GEXP	12	133287405	133299228	7813737	34.7	43.1	0.724	262
N:GEXP:DHX37:chr12:125431371:125473668:-:57647	DHX37	GEXP	12	125431371	125473668	N:GEXP:GCN1L1:chr12:120565007:120632513:-:10985	GCN1L1	GEXP	12	120565007	120632513	4798858	31.9	40.3	0.707	262
N:GEXP:DHX37:chr12:125431371:125473668:-:57647	DHX37	GEXP	12	125431371	125473668	N:GEXP:LMNB2:chr19:2427636:2456994:-:84823	LMNB2	GEXP	19	2427636	2456994	500000000	31.1	39.5	0.702	262
N:GEXP:DHX37:chr12:125431371:125473668:-:57647	DHX37	GEXP	12	125431371	125473668	N:GEXP:PTBP1:chr19:797075:812327:+:5725	PTBP1	GEXP	19	797075	812327	500000000	29.7	38.1	0.693	262
N:GEXP:DHX37:chr12:125431371:125473668:-:57647	DHX37	GEXP	12	125431371	125473668	N:GEXP:RBM10:chrX:47004268:47046212:+:8241	RBM10	GEXP	X	47004268	47046212	500000000	29.5	37.9	0.692	262
N:GEXP:DHX37:chr12:125431371:125473668:-:57647	DHX37	GEXP	12	125431371	125473668	N:GEXP:TRIM28:chr19:59055458:59062089:+:10155	TRIM28	GEXP	19	59055458	59062089	500000000	29.1	37.5	0.689	262
N:GEXP:DHX37:chr12:125431371:125473668:-:57647	DHX37	GEXP	12	125431371	125473668	N:GEXP:POLD1:chr19:50887461:50921273:+:5424	POLD1	GEXP	19	50887461	50921273	500000000	28.9	37.3	0.687	262
N:GEXP:BOP1:chr8:145486055:145515082:-:23246,2of2	BOP1	GEXP	8	145486055	145515082	N:GEXP:DHX37:chr12:125431371:125473668:-:57647	DHX37	GEXP	12	125431371	125473668	500000000	27.5	35.9	0.678	262
N:GEXP:DHX37:chr12:125431371:125473668:-:57647	DHX37	GEXP	12	125431371	125473668	N:GEXP:NOC4L:chr12:132628993:132637013:+:79050	NOC4L	GEXP	12	132628993	132637013	7155325	26.6	35	0.672	262
N:GEXP:CHERP:chr19:16628700:16653341:-:10523	CHERP	GEXP	19	16628700	16653341	N:GEXP:DHX37:chr12:125431371:125473668:-:57647	DHX37	GEXP	12	125431371	125473668	500000000	25.8	34.2	0.666	262
N:GEXP:DHX37:chr12:125431371:125473668:-:57647	DHX37	GEXP	12	125431371	125473668	N:GEXP:GRWD1:chr19:48949030:48960279:+:83743	GRWD1	GEXP	19	48949030	48960279	500000000	25.3	33.7	0.662	262
N:GEXP:ARMC6:chr19:19144384:19170563:+:93436	ARMC6	GEXP	19	19144384	19170563	N:GEXP:DHX37:chr12:125431371:125473668:-:57647	DHX37	GEXP	12	125431371	125473668	500000000	24.8	33.2	0.658	262
N:GEXP:DHX37:chr12:125431371:125473668:-:57647	DHX37	GEXP	12	125431371	125473668	N:GEXP:PRPF19:chr11:60658202:60674060:-:27339	PRPF19	GEXP	11	60658202	60674060	500000000	24.8	33.2	0.658	262
N:GEXP:DHX37:chr12:125431371:125473668:-:57647	DHX37	GEXP	12	125431371	125473668	N:GEXP:MYBBP1A:chr17:4442192:4458926:-:10514	MYBBP1A	GEXP	17	4442192	4458926	500000000	24.7	33.1	0.658	262
N:GEXP:CCDC42B:chr12:113587663:113597081:+:387885	CCDC42B	GEXP	12	113587663	113597081	N:GEXP:DHX37:chr12:125431371:125473668:-:57647	DHX37	GEXP	12	125431371	125473668	11834290	24.3	32.7	0.655	262
N:GEXP:DDX51:chr12:132621139:132628880:-:317781	DDX51	GEXP	12	132621139	132628880	N:GEXP:DHX37:chr12:125431371:125473668:-:57647	DHX37	GEXP	12	125431371	125473668	7147471	24.1	32.5	0.653	262
N:GEXP:DHX37:chr12:125431371:125473668:-:57647	DHX37	GEXP	12	125431371	125473668	N:MIRN:hsa-miR-17-3p:chr13:92002859:92002942:+:MIMAT0000071	hsa-miR-17-3p	MIRN	13	92002859	92002942	500000000	8	15.2	0.472	262
N:GEXP:DHX37:chr12:125431371:125473668:-:57647	DHX37	GEXP	12	125431371	125473668	N:MIRN:hsa-miR-1180:chr17:19247819:19247887:+:MIMAT0005825	hsa-miR-1180	MIRN	17	19247819	19247887	500000000	6.9	14.1	0.456	262
N:GEXP:DHX37:chr12:125431371:125473668:-:57647	DHX37	GEXP	12	125431371	125473668	N:MIRN:hsa-miR-942:chr1:117637265:117637350:+:MIMAT0004985	hsa-miR-942	MIRN	1	117637265	117637350	500000000	6	13.2	0.442	262
N:GEXP:DHX37:chr12:125431371:125473668:-:57647	DHX37	GEXP	12	125431371	125473668	N:MIRN:hsa-miR-128:chr2:136422967:136423048:+:MIMAT0000424	hsa-miR-128	MIRN	2	136422967	136423048	500000000	5.9	13.1	0.44	262
N:GEXP:DHX37:chr12:125431371:125473668:-:57647	DHX37	GEXP	12	125431371	125473668	N:MIRN:hsa-miR-877-5p:chr6:30552109:30552194:+:MIMAT0004949	hsa-miR-877-5p	MIRN	6	30552109	30552194	500000000	5.7	12.9	0.437	262
N:GEXP:DHX37:chr12:125431371:125473668:-:57647	DHX37	GEXP	12	125431371	125473668	N:MIRN:hsa-miR-3615:chr17:72744752:72744838:+:MIMAT0017994	hsa-miR-3615	MIRN	17	72744752	72744838	500000000	5.6	12.8	0.435	262
N:GEXP:DHX37:chr12:125431371:125473668:-:57647	DHX37	GEXP	12	125431371	125473668	N:MIRN:hsa-miR-92a-3p:chr13:92003568:92003645:+:MIMAT0000092	hsa-miR-92a-3p	MIRN	13	92003568	92003645	500000000	5.5	12.7	0.434	262
N:GEXP:DHX37:chr12:125431371:125473668:-:57647	DHX37	GEXP	12	125431371	125473668	N:MIRN:hsa-miR-324-3p:chr17:7126616:7126698:+:MIMAT0000762	hsa-miR-324-3p	MIRN	17	7126616	7126698	500000000	4.6	11.8	0.418	262
N:GEXP:DHX37:chr12:125431371:125473668:-:57647	DHX37	GEXP	12	125431371	125473668	N:MIRN:hsa-miR-1307-3p:chr10:105154010:105154158:+:MIMAT0005951	hsa-miR-1307-3p	MIRN	10	105154010	105154158	500000000	4.1	11.3	0.409	262
N:GEXP:DHX37:chr12:125431371:125473668:-:57647	DHX37	GEXP	12	125431371	125473668	N:MIRN:hsa-miR-19b-1-5p:chr13:92003446:92003532:+:MIMAT0004491	hsa-miR-19b-1-5p	MIRN	13	92003446	92003532	500000000	3.8	11	0.404	262
N:GEXP:DHX37:chr12:125431371:125473668:-:57647	DHX37	GEXP	12	125431371	125473668	N:MIRN:hsa-miR-629-5p:chr15:70371711:70371807:+:MIMAT0004810	hsa-miR-629-5p	MIRN	15	70371711	70371807	500000000	3.7	10.9	0.402	262
N:GEXP:DHX37:chr12:125431371:125473668:-:57647	DHX37	GEXP	12	125431371	125473668	C:SAMP:mRNAseq_NMF_bcgsc_4:::::	Gene Expression Cluster	SAMP				500000000	4.7	10.4		254
N:GEXP:DHX37:chr12:125431371:125473668:-:57647	DHX37	GEXP	12	125431371	125473668	N:MIRN:hsa-miR-151a-3p:chr8:141742663:141742752:+:MIMAT0000757	hsa-miR-151a-3p	MIRN	8	141742663	141742752	500000000	2.9	10.1	0.388	262
N:GEXP:DHX37:chr12:125431371:125473668:-:57647	DHX37	GEXP	12	125431371	125473668	N:MIRN:hsa-miR-769-5p:chr19:46522190:46522307:+:MIMAT0003886	hsa-miR-769-5p	MIRN	19	46522190	46522307	500000000	2.9	10.1	0.387	262
N:GEXP:DHX37:chr12:125431371:125473668:-:57647	DHX37	GEXP	12	125431371	125473668	N:MIRN:hsa-miR-17-5p:chr13:92002859:92002942:+:MIMAT0000070	hsa-miR-17-5p	MIRN	13	92002859	92002942	500000000	2.9	10.1	0.388	262
N:GEXP:DHX37:chr12:125431371:125473668:-:57647	DHX37	GEXP	12	125431371	125473668	N:MIRN:hsa-miR-335-3p:chr7:130135952:130136045:+:MIMAT0004703	hsa-miR-335-3p	MIRN	7	130135952	130136045	500000000	2.2	9.4	0.373	262
N:GEXP:DHX37:chr12:125431371:125473668:-:57647	DHX37	GEXP	12	125431371	125473668	N:MIRN:hsa-miR-219-1-3p:chr6:33175612:33175721:+:MIMAT0004567	hsa-miR-219-1-3p	MIRN	6	33175612	33175721	500000000	2.1	9.3	0.371	262
N:GEXP:DHX37:chr12:125431371:125473668:-:57647	DHX37	GEXP	12	125431371	125473668	N:MIRN:hsa-miR-423-3p:chr17:28444097:28444190:+:MIMAT0001340	hsa-miR-423-3p	MIRN	17	28444097	28444190	500000000	2	9.2	0.37	262
N:GEXP:DHX37:chr12:125431371:125473668:-:57647	DHX37	GEXP	12	125431371	125473668	N:MIRN:hsa-miR-20a-5p:chr13:92003319:92003389:+:MIMAT0000075	hsa-miR-20a-5p	MIRN	13	92003319	92003389	500000000	1.9	9.1	0.368	262
N:GEXP:DHX37:chr12:125431371:125473668:-:57647	DHX37	GEXP	12	125431371	125473668	N:MIRN:hsa-miR-1304-5p:chr11:93466840:93466930:+:MIMAT0005892	hsa-miR-1304-5p	MIRN	11	93466840	93466930	500000000	1.6	8.8	0.362	262
N:GEXP:DHX37:chr12:125431371:125473668:-:57647	DHX37	GEXP	12	125431371	125473668	N:MIRN:hsa-miR-18a-5p:chr13:92003005:92003075:+:MIMAT0000072	hsa-miR-18a-5p	MIRN	13	92003005	92003075	500000000	1.2	8.4	0.353	262
N:GEXP:DHX37:chr12:125431371:125473668:-:57647	DHX37	GEXP	12	125431371	125473668	N:MIRN:hsa-miR-92a-1-5p:chr13:92003568:92003645:+:MIMAT0004507	hsa-miR-92a-1-5p	MIRN	13	92003568	92003645	500000000	1.1	8.3	0.35	262
N:GEXP:DHX37:chr12:125431371:125473668:-:57647	DHX37	GEXP	12	125431371	125473668	N:MIRN:hsa-miR-331-5p:chr12:95702196:95702289:+:MIMAT0004700	hsa-miR-331-5p	MIRN	12	95702196	95702289	29729082	1	8.2	0.349	262
N:GEXP:DHX37:chr12:125431371:125473668:-:57647	DHX37	GEXP	12	125431371	125473668	N:MIRN:hsa-miR-18a-3p:chr13:92003005:92003075:+:MIMAT0002891	hsa-miR-18a-3p	MIRN	13	92003005	92003075	500000000	1	8.2	0.349	262
N:GEXP:DHX37:chr12:125431371:125473668:-:57647	DHX37	GEXP	12	125431371	125473668	N:MIRN:hsa-miR-93-5p:chr7:99691391:99691470:+:MIMAT0000093	hsa-miR-93-5p	MIRN	7	99691391	99691470	500000000	0.5	7.7	0.337	262
N:GEXP:DHX37:chr12:125431371:125473668:-:57647	DHX37	GEXP	12	125431371	125473668	N:MIRN:hsa-miR-769-3p:chr19:46522190:46522307:+:MIMAT0003887	hsa-miR-769-3p	MIRN	19	46522190	46522307	500000000	0.2	7.4	0.33	262
N:GEXP:DHX37:chr12:125431371:125473668:-:57647	DHX37	GEXP	12	125431371	125473668	N:MIRN:hsa-miR-629-3p:chr15:70371711:70371807:+:MIMAT0003298	hsa-miR-629-3p	MIRN	15	70371711	70371807	500000000	0.2	7.4	0.332	262
N:GEXP:DHX37:chr12:125431371:125473668:-:57647	DHX37	GEXP	12	125431371	125473668	N:MIRN:hsa-miR-185-3p:chr22:20020662:20020743:+:MIMAT0004611	hsa-miR-185-3p	MIRN	22	20020662	20020743	500000000	0.1	7.3	0.328	262
N:GEXP:DHX37:chr12:125431371:125473668:-:57647	DHX37	GEXP	12	125431371	125473668	N:MIRN:hsa-miR-7-5p:chr15:89155056:89155165:+:MIMAT0000252	hsa-miR-7-5p	MIRN	15	89155056	89155165	500000000	0.1	7.3	0.329	262
N:GEXP:DHX37:chr12:125431371:125473668:-:57647	DHX37	GEXP	12	125431371	125473668	N:MIRN:hsa-miR-221-3p:chrX:45605585:45605694:+:MIMAT0000278	hsa-miR-221-3p	MIRN	X	45605585	45605694	500000000	0	7.2	0.327	262
N:GEXP:DHX37:chr12:125431371:125473668:-:57647	DHX37	GEXP	12	125431371	125473668	N:MIRN:hsa-miR-16-1-3p:chr13:50623109:50623197:+:MIMAT0004489	hsa-miR-16-1-3p	MIRN	13	50623109	50623197	500000000	0	7.1	0.324	262
N:GEXP:DHX37:chr12:125431371:125473668:-:57647	DHX37	GEXP	12	125431371	125473668	N:MIRN:hsa-miR-106b-3p:chr7:99691616:99691697:+:MIMAT0004672	hsa-miR-106b-3p	MIRN	7	99691616	99691697	500000000	0	7.1	0.324	262
N:GEXP:DHX37:chr12:125431371:125473668:-:57647	DHX37	GEXP	12	125431371	125473668	B:SAMP:I(C1|mRNAseq_NMF_bcgsc_4):::::	Gene Expression Cluster 1	SAMP				500000000	0.7	7.1	-0.338	254
N:GEXP:DHX37:chr12:125431371:125473668:-:57647	DHX37	GEXP	12	125431371	125473668	N:MIRN:hsa-miR-615-3p:chr12:54427734:54427829:+:MIMAT0003283	hsa-miR-615-3p	MIRN	12	54427734	54427829	71003542	0	7	0.323	262
N:GEXP:DHX37:chr12:125431371:125473668:-:57647	DHX37	GEXP	12	125431371	125473668	N:MIRN:hsa-let-7f-5p:chr9:96938629:96938715:+:MIMAT0000067	hsa-let-7f-5p	MIRN	9	96938629	96938715	500000000	0	7	0.321	262
N:GEXP:DHX37:chr12:125431371:125473668:-:57647	DHX37	GEXP	12	125431371	125473668	N:MIRN:hsa-miR-652-3p:chrX:109298557:109298654:+:MIMAT0003322	hsa-miR-652-3p	MIRN	X	109298557	109298654	500000000	0	6.9	0.319	262
N:GEXP:DHX37:chr12:125431371:125473668:-:57647	DHX37	GEXP	12	125431371	125473668	N:MIRN:hsa-miR-584-5p:chr5:148441876:148441972:+:MIMAT0003249	hsa-miR-584-5p	MIRN	5	148441876	148441972	500000000	0	6.9	0.319	262
N:GEXP:DHX37:chr12:125431371:125473668:-:57647	DHX37	GEXP	12	125431371	125473668	N:MIRN:hsa-miR-30a-5p:chr6:72113254:72113324:+:MIMAT0000087	hsa-miR-30a-5p	MIRN	6	72113254	72113324	500000000	0	6.9	-0.32	262
N:GEXP:DHX37:chr12:125431371:125473668:-:57647	DHX37	GEXP	12	125431371	125473668	N:MIRN:hsa-miR-937-3p:chr8:144895127:144895212:+:MIMAT0004980	hsa-miR-937-3p	MIRN	8	144895127	144895212	500000000	0	6.9	0.319	262
N:GEXP:DHX37:chr12:125431371:125473668:-:57647	DHX37	GEXP	12	125431371	125473668	N:MIRN:hsa-miR-107:chr10:91352504:91352584:+:MIMAT0000104	hsa-miR-107	MIRN	10	91352504	91352584	500000000	0	6.8	0.318	262
N:GEXP:DHX37:chr12:125431371:125473668:-:57647	DHX37	GEXP	12	125431371	125473668	N:MIRN:hsa-miR-744-5p:chr17:11985216:11985313:+:MIMAT0004945	hsa-miR-744-5p	MIRN	17	11985216	11985313	500000000	0	6.8	0.316	262
N:GEXP:DHX37:chr12:125431371:125473668:-:57647	DHX37	GEXP	12	125431371	125473668	B:SAMP:I(C3|mRNAseq_NMF_bcgsc_4):::::	Gene Expression Cluster 3	SAMP				500000000	0.4	6.8	0.33	254
N:GEXP:DHX37:chr12:125431371:125473668:-:57647	DHX37	GEXP	12	125431371	125473668	N:MIRN:hsa-miR-25-5p:chr7:99691183:99691266:+:MIMAT0004498	hsa-miR-25-5p	MIRN	7	99691183	99691266	500000000	0	6.6	0.312	262
N:GEXP:DHX37:chr12:125431371:125473668:-:57647	DHX37	GEXP	12	125431371	125473668	N:MIRN:hsa-miR-760:chr1:94312388:94312467:+:MIMAT0004957	hsa-miR-760	MIRN	1	94312388	94312467	500000000	0	6.6	0.313	262
N:GEXP:DHX37:chr12:125431371:125473668:-:57647	DHX37	GEXP	12	125431371	125473668	N:MIRN:hsa-miR-106b-5p:chr7:99691616:99691697:+:MIMAT0000680	hsa-miR-106b-5p	MIRN	7	99691616	99691697	500000000	0	6.5	0.311	262
N:GEXP:DHX37:chr12:125431371:125473668:-:57647	DHX37	GEXP	12	125431371	125473668	N:MIRN:hsa-miR-2277-5p:chr5:92956402:92956494:+:MIMAT0017352	hsa-miR-2277-5p	MIRN	5	92956402	92956494	500000000	0	6.4	0.307	262
N:GEXP:DHX37:chr12:125431371:125473668:-:57647	DHX37	GEXP	12	125431371	125473668	N:MIRN:hsa-miR-185-5p:chr22:20020662:20020743:+:MIMAT0000455	hsa-miR-185-5p	MIRN	22	20020662	20020743	500000000	0	6.3	0.304	262
N:GEXP:DHX37:chr12:125431371:125473668:-:57647	DHX37	GEXP	12	125431371	125473668	N:MIRN:hsa-miR-98-5p:chrX:53583184:53583302:+:MIMAT0000096	hsa-miR-98-5p	MIRN	X	53583184	53583302	500000000	0	6.3	0.305	262
N:GEXP:DHX37:chr12:125431371:125473668:-:57647	DHX37	GEXP	12	125431371	125473668	C:SAMP:iCluster_k3:::::	Integrative Cluster - iCluster (k=3)	SAMP				500000000	0.6	6.3		227
Table3.BRCA
id_a	pretty_label_a	datatype_a	chr_a	start_a	end_a	id_b	pretty_label_b	datatype_b	chr_b	start_b	end_b	link_distance	adj_logged_pvalue	logged_pvalue	correlation	num_nonna
N:GEXP:DDX54:chr12:113594978:113623284:-:79039	DDX54	GEXP	12	113594978	113623284	N:GEXP:DHX37:chr12:125431370:125473667:-:57647	DHX37	GEXP	12	125431370	125473667	11808086	105.9	114	0.677	844
N:GEXP:DHX37:chr12:125431370:125473667:-:57647	DHX37	GEXP	12	125431370	125473667	N:GEXP:PGAM5:chr12:133264635:133299323:+:192111	PGAM5	GEXP	12	133264635	133299323	7790968	87.1	95.2	0.633	844
N:GEXP:DHX37:chr12:125431370:125473667:-:57647	DHX37	GEXP	12	125431370	125473667	N:GEXP:PUS1:chr12:132413745:132428406:+:80324	PUS1	GEXP	12	132413745	132428406	6940078	68.3	76.4	0.579	844
N:GEXP:DHX37:chr12:125431370:125473667:-:57647	DHX37	GEXP	12	125431370	125473667	N:GEXP:RAB35:chr12:120532899:120554643:-:11021	RAB35	GEXP	12	120532899	120554643	4876727	62.4	70.5	0.56	844
N:GEXP:DHX37:chr12:125431370:125473667:-:57647	DHX37	GEXP	12	125431370	125473667	N:GEXP:RBM19:chr12:114254543:114404176:-:9904	RBM19	GEXP	12	114254543	114404176	11027194	56.6	64.7	0.54	844
N:GEXP:DHX37:chr12:125431370:125473667:-:57647	DHX37	GEXP	12	125431370	125473667	N:GEXP:GCN1L1:chr12:120565014:120632513:-:10985	GCN1L1	GEXP	12	120565014	120632513	4798857	52.5	60.6	0.525	844
N:GEXP:DHX37:chr12:125431370:125473667:-:57647	DHX37	GEXP	12	125431370	125473667	N:GEXP:SART3:chr12:108915991:108955176:-:9733	SART3	GEXP	12	108915991	108955176	16476194	44.4	52.5	0.493	844
N:GEXP:DHX37:chr12:125431370:125473667:-:57647	DHX37	GEXP	12	125431370	125473667	N:GEXP:NOC4L:chr12:132628993:132636986:+:79050	NOC4L	GEXP	12	132628993	132636986	7155326	44	52	0.491	844
N:CNVR:12q24.3:chr12:125487000:125998999::	chr12:125,487,000-125,998,999 (512Mb, 12q24.3)	CNVR	12	125487000	125998999	N:GEXP:DHX37:chr12:125431370:125473667:-:57647	DHX37	GEXP	12	125431370	125473667	13333	27.9	36.2	0.418	833
N:CNVR:TMEM132B:chr12:126001000:126126999::	chr12:126,001,000-126,126,999 (126Mb, TMEM132B)	CNVR	12	126001000	126126999	N:GEXP:DHX37:chr12:125431370:125473667:-:57647	DHX37	GEXP	12	125431370	125473667	527333	26.8	35.1	0.412	833
N:CNVR:BRI3BP:chr12:125486000:125486999::	chr12:125,486,000-125,486,999 (100kb, BRI3BP)	CNVR	12	125486000	125486999	N:GEXP:DHX37:chr12:125431370:125473667:-:57647	DHX37	GEXP	12	125431370	125473667	12333	26.5	34.8	0.41	833
N:CNVR:12q24.32:chr12:126128000:126824999::	chr12:126,128,000-126,824,999 (697Mb, 12q24.32)	CNVR	12	126128000	126824999	N:GEXP:DHX37:chr12:125431370:125473667:-:57647	DHX37	GEXP	12	125431370	125473667	654333	26.1	34.3	0.408	833
N:CNVR:LOC100128554:chr12:126826000:126993999::	chr12:126,826,000-126,993,999 (168Mb, LOC100128554)	CNVR	12	126826000	126993999	N:GEXP:DHX37:chr12:125431370:125473667:-:57647	DHX37	GEXP	12	125431370	125473667	1352333	25.5	33.8	0.405	833
N:CNVR:12q24.32:chr12:127005000:127124999::	chr12:127,005,000-127,124,999 (120Mb, 12q24.32)	CNVR	12	127005000	127124999	N:GEXP:DHX37:chr12:125431370:125473667:-:57647	DHX37	GEXP	12	125431370	125473667	1531333	25.3	33.6	0.404	833
N:CNVR:TMEM132B:chr12:126127000:126127999::	chr12:126,127,000-126,127,999 (100kb, TMEM132B)	CNVR	12	126127000	126127999	N:GEXP:DHX37:chr12:125431370:125473667:-:57647	DHX37	GEXP	12	125431370	125473667	653333	25.2	33.5	0.403	833
N:CNVR:TMEM132B:chr12:126000000:126000999::	chr12:126,000,000-126,000,999 (100kb, TMEM132B)	CNVR	12	126000000	126000999	N:GEXP:DHX37:chr12:125431370:125473667:-:57647	DHX37	GEXP	12	125431370	125473667	526333	24.9	33.2	0.401	833
N:CNVR:12q24.32:chr12:126825000:126825999::	chr12:126,825,000-126,825,999 (100kb, 12q24.32)	CNVR	12	126825000	126825999	N:GEXP:DHX37:chr12:125431370:125473667:-:57647	DHX37	GEXP	12	125431370	125473667	1351333	24.4	32.7	0.399	833
N:CNVR:12q24.32:chr12:127131000:127372999::	chr12:127,131,000-127,372,999 (242Mb, 12q24.32)	CNVR	12	127131000	127372999	N:GEXP:DHX37:chr12:125431370:125473667:-:57647	DHX37	GEXP	12	125431370	125473667	1657333	24.3	32.6	0.398	833
N:CNVR:RIMBP2:chr12:130972000:131150999::	chr12:130,972,000-131,150,999 (179Mb, RIMBP2)	CNVR	12	130972000	131150999	N:GEXP:DHX37:chr12:125431370:125473667:-:57647	DHX37	GEXP	12	125431370	125473667	5498333	23.5	31.8	0.393	833
N:CNVR:POLE:chr12:133225000:133226999::	chr12:133,225,000-133,226,999 (2Mb, POLE)	CNVR	12	133225000	133226999	N:GEXP:DHX37:chr12:125431370:125473667:-:57647	DHX37	GEXP	12	125431370	125473667	7751333	23.1	31.4	0.391	833
N:CNVR:12q24.32:chr12:128317000:128433999::	chr12:128,317,000-128,433,999 (117Mb, 12q24.32)	CNVR	12	128317000	128433999	N:GEXP:DHX37:chr12:125431370:125473667:-:57647	DHX37	GEXP	12	125431370	125473667	2843333	23.1	31.4	0.391	833
N:CNVR:SFSWAP:chr12:132262000:132262999::	chr12:132,262,000-132,262,999 (100kb, SFSWAP)	CNVR	12	132262000	132262999	N:GEXP:DHX37:chr12:125431370:125473667:-:57647	DHX37	GEXP	12	125431370	125473667	6788333	23	31.3	0.391	833
N:CNVR:RIMBP2:chr12:130862000:130966999::	chr12:130,862,000-130,966,999 (105Mb, RIMBP2)	CNVR	12	130862000	130966999	N:GEXP:DHX37:chr12:125431370:125473667:-:57647	DHX37	GEXP	12	125431370	125473667	5388333	22.9	31.2	0.39	833
N:CNVR:12q24.32:chr12:127586000:127722999::	chr12:127,586,000-127,722,999 (137Mb, 12q24.32)	CNVR	12	127586000	127722999	N:GEXP:DHX37:chr12:125431370:125473667:-:57647	DHX37	GEXP	12	125431370	125473667	2112333	22.9	31.2	0.39	833
N:CNVR:BC032874:chr12:127374000:127489999::	chr12:127,374,000-127,489,999 (116Mb, BC032874)	CNVR	12	127374000	127489999	N:GEXP:DHX37:chr12:125431370:125473667:-:57647	DHX37	GEXP	12	125431370	125473667	1900333	22.8	31.1	0.389	833
N:CNVR:TMEM132B:chr12:125999000:125999999::	chr12:125,999,000-125,999,999 (100kb, TMEM132B)	CNVR	12	125999000	125999999	N:GEXP:DHX37:chr12:125431370:125473667:-:57647	DHX37	GEXP	12	125431370	125473667	525333	22.8	31.1	0.389	833
N:CNVR:12q24.32:chr12:127998000:128315999::	chr12:127,998,000-128,315,999 (318Mb, 12q24.32)	CNVR	12	127998000	128315999	N:GEXP:DHX37:chr12:125431370:125473667:-:57647	DHX37	GEXP	12	125431370	125473667	2524333	22.6	30.9	0.388	833
N:CNVR:12q24.33:chr12:132378000:133224999::	chr12:132,378,000-133,224,999 (847Mb, 12q24.33)	CNVR	12	132378000	133224999	N:GEXP:DHX37:chr12:125431370:125473667:-:57647	DHX37	GEXP	12	125431370	125473667	6904333	22.6	30.9	0.388	833
N:CNVR:TMEM132D:chr12:130000000:130002999::	chr12:130,000,000-130,002,999 (3Mb, TMEM132D)	CNVR	12	130000000	130002999	N:GEXP:DHX37:chr12:125431370:125473667:-:57647	DHX37	GEXP	12	125431370	125473667	4526333	22.6	30.9	0.388	833
N:CNVR:BC032874:chr12:127494000:127574999::	chr12:127,494,000-127,574,999 (81Mb, BC032874)	CNVR	12	127494000	127574999	N:GEXP:DHX37:chr12:125431370:125473667:-:57647	DHX37	GEXP	12	125431370	125473667	2020333	22.5	30.8	0.388	833
N:CNVR:12q24:chr12:120043000:125485999::	chr12:120,043,000-125,485,999 (5bp, 12q24)	CNVR	12	120043000	125485999	N:GEXP:DHX37:chr12:125431370:125473667:-:57647	DHX37	GEXP	12	125431370	125473667	0	22.4	30.7	0.387	833
N:CNVR:12q24.33:chr12:132023000:132096999::	chr12:132,023,000-132,096,999 (74Mb, 12q24.33)	CNVR	12	132023000	132096999	N:GEXP:DHX37:chr12:125431370:125473667:-:57647	DHX37	GEXP	12	125431370	125473667	6549333	22.4	30.7	0.387	833
N:CNVR:SFSWAP:chr12:132153000:132261999::	chr12:132,153,000-132,261,999 (109Mb, SFSWAP)	CNVR	12	132153000	132261999	N:GEXP:DHX37:chr12:125431370:125473667:-:57647	DHX37	GEXP	12	125431370	125473667	6679333	22.3	30.6	0.386	833
N:CNVR:RIMBP2:chr12:130967000:130971999::	chr12:130,967,000-130,971,999 (5Mb, RIMBP2)	CNVR	12	130967000	130971999	N:GEXP:DHX37:chr12:125431370:125473667:-:57647	DHX37	GEXP	12	125431370	125473667	5493333	22.3	30.6	0.386	833
N:CNVR:12q24.33:chr12:131151000:131473999::	chr12:131,151,000-131,473,999 (323Mb, 12q24.33)	CNVR	12	131151000	131473999	N:GEXP:DHX37:chr12:125431370:125473667:-:57647	DHX37	GEXP	12	125431370	125473667	5677333	22.3	30.6	0.386	833
N:CNVR:12q24.32:chr12:127724000:127996999::	chr12:127,724,000-127,996,999 (273Mb, 12q24.32)	CNVR	12	127724000	127996999	N:GEXP:DHX37:chr12:125431370:125473667:-:57647	DHX37	GEXP	12	125431370	125473667	2250333	22.3	30.6	0.386	833
N:CNVR:TMEM132D:chr12:130004000:130206999::	chr12:130,004,000-130,206,999 (203Mb, TMEM132D)	CNVR	12	130004000	130206999	N:GEXP:DHX37:chr12:125431370:125473667:-:57647	DHX37	GEXP	12	125431370	125473667	4530333	22.3	30.6	0.386	833
N:CNVR:LOC338797:chr12:131826000:131929999::	chr12:131,826,000-131,929,999 (104Mb, LOC338797)	CNVR	12	131826000	131929999	N:GEXP:DHX37:chr12:125431370:125473667:-:57647	DHX37	GEXP	12	125431370	125473667	6352333	22.2	30.5	0.386	833
N:CNVR:12q24.33:chr12:132263000:132376999::	chr12:132,263,000-132,376,999 (114Mb, 12q24.33)	CNVR	12	132263000	132376999	N:GEXP:DHX37:chr12:125431370:125473667:-:57647	DHX37	GEXP	12	125431370	125473667	6789333	22.2	30.5	0.386	833
N:CNVR:12q24.33:chr12:131930000:132021999::	chr12:131,930,000-132,021,999 (92Mb, 12q24.33)	CNVR	12	131930000	132021999	N:GEXP:DHX37:chr12:125431370:125473667:-:57647	DHX37	GEXP	12	125431370	125473667	6456333	22.1	30.4	0.385	833
N:CNVR:12q24.33:chr12:131475000:131730999::	chr12:131,475,000-131,730,999 (256Mb, 12q24.33)	CNVR	12	131475000	131730999	N:GEXP:DHX37:chr12:125431370:125473667:-:57647	DHX37	GEXP	12	125431370	125473667	6001333	22.1	30.4	0.385	833
N:CNVR:12q24.32:chr12:128435000:128808999::	chr12:128,435,000-128,808,999 (374Mb, 12q24.32)	CNVR	12	128435000	128808999	N:GEXP:DHX37:chr12:125431370:125473667:-:57647	DHX37	GEXP	12	125431370	125473667	2961333	22	30.3	0.384	833
N:CNVR:TMEM132C:chr12:128809000:128809999::	chr12:128,809,000-128,809,999 (100kb, TMEM132C)	CNVR	12	128809000	128809999	N:GEXP:DHX37:chr12:125431370:125473667:-:57647	DHX37	GEXP	12	125431370	125473667	3335333	22	30.3	0.385	833
N:CNVR:12q24.32:chr12:127723000:127723999::	chr12:127,723,000-127,723,999 (100kb, 12q24.32)	CNVR	12	127723000	127723999	N:GEXP:DHX37:chr12:125431370:125473667:-:57647	DHX37	GEXP	12	125431370	125473667	2249333	22	30.3	0.384	833
N:CNVR:BC045798:chr12:128434000:128434999::	chr12:128,434,000-128,434,999 (100kb, BC045798)	CNVR	12	128434000	128434999	N:GEXP:DHX37:chr12:125431370:125473667:-:57647	DHX37	GEXP	12	125431370	125473667	2960333	21.9	30.2	0.384	833
N:CNVR:12q24.33:chr12:131797000:131802999::	chr12:131,797,000-131,802,999 (6Mb, 12q24.33)	CNVR	12	131797000	131802999	N:GEXP:DHX37:chr12:125431370:125473667:-:57647	DHX37	GEXP	12	125431370	125473667	6323333	21.8	30.1	0.387	816
N:CNVR:12q24.32:chr12:128316000:128316999::	chr12:128,316,000-128,316,999 (100kb, 12q24.32)	CNVR	12	128316000	128316999	N:GEXP:DHX37:chr12:125431370:125473667:-:57647	DHX37	GEXP	12	125431370	125473667	2842333	21.7	30	0.383	833
N:CNVR:12q24.32:chr12:127125000:127130999::	chr12:127,125,000-127,130,999 (6Mb, 12q24.32)	CNVR	12	127125000	127130999	N:GEXP:DHX37:chr12:125431370:125473667:-:57647	DHX37	GEXP	12	125431370	125473667	1651333	21.7	30	0.383	833
N:CNVR:12q24.33:chr12:130519000:130762999::	chr12:130,519,000-130,762,999 (244Mb, 12q24.33)	CNVR	12	130519000	130762999	N:GEXP:DHX37:chr12:125431370:125473667:-:57647	DHX37	GEXP	12	125431370	125473667	5045333	21.7	30	0.383	833
N:CNVR:TMEM132D:chr12:130208000:130269999::	chr12:130,208,000-130,269,999 (62Mb, TMEM132D)	CNVR	12	130208000	130269999	N:GEXP:DHX37:chr12:125431370:125473667:-:57647	DHX37	GEXP	12	125431370	125473667	4734333	21.7	30	0.383	833
N:CNVR:12q24.33:chr12:132377000:132377999::	chr12:132,377,000-132,377,999 (100kb, 12q24.33)	CNVR	12	132377000	132377999	N:GEXP:DHX37:chr12:125431370:125473667:-:57647	DHX37	GEXP	12	125431370	125473667	6903333	21.6	29.9	0.382	833
N:CNVR:12q24.33:chr12:129460000:129877999::	chr12:129,460,000-129,877,999 (418Mb, 12q24.33)	CNVR	12	129460000	129877999	N:GEXP:DHX37:chr12:125431370:125473667:-:57647	DHX37	GEXP	12	125431370	125473667	3986333	21.6	29.9	0.382	833
N:CNVR:TMEM132D:chr12:129878000:129999999::	chr12:129,878,000-129,999,999 (122Mb, TMEM132D)	CNVR	12	129878000	129999999	N:GEXP:DHX37:chr12:125431370:125473667:-:57647	DHX37	GEXP	12	125431370	125473667	4404333	21.6	29.9	0.382	833
N:CNVR:12q24.33:chr12:133227000:133778000::	chr12:133,227,000-133,778,000 (551Mb, 12q24.33)	CNVR	12	133227000	133778000	N:GEXP:DHX37:chr12:125431370:125473667:-:57647	DHX37	GEXP	12	125431370	125473667	7753333	21.6	29.9	0.382	833
N:CNVR:TMEM132D:chr12:130207000:130207999::	chr12:130,207,000-130,207,999 (100kb, TMEM132D)	CNVR	12	130207000	130207999	N:GEXP:DHX37:chr12:125431370:125473667:-:57647	DHX37	GEXP	12	125431370	125473667	4733333	21.6	29.9	0.382	833
N:CNVR:PIWIL1:chr12:130764000:130861999::	chr12:130,764,000-130,861,999 (98Mb, PIWIL1)	CNVR	12	130764000	130861999	N:GEXP:DHX37:chr12:125431370:125473667:-:57647	DHX37	GEXP	12	125431370	125473667	5290333	21.5	29.8	0.382	833
N:CNVR:TMEM132C:chr12:128810000:128818999::	chr12:128,810,000-128,818,999 (9Mb, TMEM132C)	CNVR	12	128810000	128818999	N:GEXP:DHX37:chr12:125431370:125473667:-:57647	DHX37	GEXP	12	125431370	125473667	3336333	21.5	29.8	0.381	833
N:CNVR:12q24.31:chr12:124802639:125054934::Gistic_ROI_r_del	12q24.31 Deletion (Gistic, continuous)	CNVR	12	124802639	125054934	N:GEXP:DHX37:chr12:125431370:125473667:-:57647	DHX37	GEXP	12	125431370	125473667	376436	21.4	29.7	0.383	824
N:CNVR:TMEM132C:chr12:128909000:129164999::	chr12:128,909,000-129,164,999 (256Mb, TMEM132C)	CNVR	12	128909000	129164999	N:GEXP:DHX37:chr12:125431370:125473667:-:57647	DHX37	GEXP	12	125431370	125473667	3435333	21.4	29.7	0.381	833
N:CNVR:12q24.33:chr12:130763000:130763999::	chr12:130,763,000-130,763,999 (100kb, 12q24.33)	CNVR	12	130763000	130763999	N:GEXP:DHX37:chr12:125431370:125473667:-:57647	DHX37	GEXP	12	125431370	125473667	5289333	21.4	29.7	0.381	833
N:CNVR:GLT1D1:chr12:129459000:129459999::	chr12:129,459,000-129,459,999 (100kb, GLT1D1)	CNVR	12	129459000	129459999	N:GEXP:DHX37:chr12:125431370:125473667:-:57647	DHX37	GEXP	12	125431370	125473667	3985333	21.4	29.7	0.381	833
N:CNVR:TMEM132D:chr12:130305000:130446999::	chr12:130,305,000-130,446,999 (142Mb, TMEM132D)	CNVR	12	130305000	130446999	N:GEXP:DHX37:chr12:125431370:125473667:-:57647	DHX37	GEXP	12	125431370	125473667	4831333	21.3	29.6	0.38	833
N:CNVR:LOC100190940:chr12:130451000:130518999::	chr12:130,451,000-130,518,999 (68Mb, LOC100190940)	CNVR	12	130451000	130518999	N:GEXP:DHX37:chr12:125431370:125473667:-:57647	DHX37	GEXP	12	125431370	125473667	4977333	21.2	29.5	0.379	833
N:CNVR:TMEM132C:chr12:128822000:128908999::	chr12:128,822,000-128,908,999 (87Mb, TMEM132C)	CNVR	12	128822000	128908999	N:GEXP:DHX37:chr12:125431370:125473667:-:57647	DHX37	GEXP	12	125431370	125473667	3348333	21.2	29.5	0.379	833
N:CNVR:BC032874:chr12:127490000:127493999::	chr12:127,490,000-127,493,999 (4Mb, BC032874)	CNVR	12	127490000	127493999	N:GEXP:DHX37:chr12:125431370:125473667:-:57647	DHX37	GEXP	12	125431370	125473667	2016333	21.2	29.5	0.379	833
N:CNVR:GPR133:chr12:131474000:131474999::	chr12:131,474,000-131,474,999 (100kb, GPR133)	CNVR	12	131474000	131474999	N:GEXP:DHX37:chr12:125431370:125473667:-:57647	DHX37	GEXP	12	125431370	125473667	6000333	21	29.3	0.378	833
N:CNVR:TMEM132D:chr12:130275000:130298999::	chr12:130,275,000-130,298,999 (24Mb, TMEM132D)	CNVR	12	130275000	130298999	N:GEXP:DHX37:chr12:125431370:125473667:-:57647	DHX37	GEXP	12	125431370	125473667	4801333	21	29.3	0.378	833
N:CNVR:12q24.32:chr12:127997000:127997999::	chr12:127,997,000-127,997,999 (100kb, 12q24.32)	CNVR	12	127997000	127997999	N:GEXP:DHX37:chr12:125431370:125473667:-:57647	DHX37	GEXP	12	125431370	125473667	2523333	21	29.3	0.378	833
N:CNVR:12q24.33:chr12:131803000:131816999::	chr12:131,803,000-131,816,999 (14Mb, 12q24.33)	CNVR	12	131803000	131816999	N:GEXP:DHX37:chr12:125431370:125473667:-:57647	DHX37	GEXP	12	125431370	125473667	6329333	20.9	29.2	0.378	833
N:CNVR:12q24.33:chr12:132097000:132097999::	chr12:132,097,000-132,097,999 (100kb, 12q24.33)	CNVR	12	132097000	132097999	N:GEXP:DHX37:chr12:125431370:125473667:-:57647	DHX37	GEXP	12	125431370	125473667	6623333	20.8	29.1	0.377	833
N:CNVR:12q24.33:chr12:131817000:131824999::	chr12:131,817,000-131,824,999 (8Mb, 12q24.33)	CNVR	12	131817000	131824999	N:GEXP:DHX37:chr12:125431370:125473667:-:57647	DHX37	GEXP	12	125431370	125473667	6343333	20.7	29	0.376	833
N:CNVR:TMEM132C:chr12:128819000:128821999::	chr12:128,819,000-128,821,999 (3Mb, TMEM132C)	CNVR	12	128819000	128821999	N:GEXP:DHX37:chr12:125431370:125473667:-:57647	DHX37	GEXP	12	125431370	125473667	3345333	20.8	29	0.377	833
N:CNVR:12q24.33:chr12:132022000:132022999::	chr12:132,022,000-132,022,999 (100kb, 12q24.33)	CNVR	12	132022000	132022999	N:GEXP:DHX37:chr12:125431370:125473667:-:57647	DHX37	GEXP	12	125431370	125473667	6548333	20.6	28.9	0.376	833
N:CNVR:12q24.3:chr12:129233000:129458999::	chr12:129,233,000-129,458,999 (226Mb, 12q24.3)	CNVR	12	129233000	129458999	N:GEXP:DHX37:chr12:125431370:125473667:-:57647	DHX37	GEXP	12	125431370	125473667	3759333	20.6	28.9	0.376	833
N:CNVR:TMEM132C:chr12:129165000:129228999::	chr12:129,165,000-129,228,999 (64Mb, TMEM132C)	CNVR	12	129165000	129228999	N:GEXP:DHX37:chr12:125431370:125473667:-:57647	DHX37	GEXP	12	125431370	125473667	3691333	20.6	28.9	0.376	833
N:CNVR:TMEM132D:chr12:130270000:130274999::	chr12:130,270,000-130,274,999 (5Mb, TMEM132D)	CNVR	12	130270000	130274999	N:GEXP:DHX37:chr12:125431370:125473667:-:57647	DHX37	GEXP	12	125431370	125473667	4796333	20.5	28.8	0.375	833
N:CNVR:12q24.33:chr12:131731000:131772999::	chr12:131,731,000-131,772,999 (42Mb, 12q24.33)	CNVR	12	131731000	131772999	N:GEXP:DHX37:chr12:125431370:125473667:-:57647	DHX37	GEXP	12	125431370	125473667	6257333	20.4	28.7	0.375	833
N:CNVR:12q24.33:chr12:131825000:131825999::	chr12:131,825,000-131,825,999 (100kb, 12q24.33)	CNVR	12	131825000	131825999	N:GEXP:DHX37:chr12:125431370:125473667:-:57647	DHX37	GEXP	12	125431370	125473667	6351333	20.4	28.7	0.375	833
N:CNVR:12q24.33:chr12:132098000:132098999::	chr12:132,098,000-132,098,999 (100kb, 12q24.33)	CNVR	12	132098000	132098999	N:GEXP:DHX37:chr12:125431370:125473667:-:57647	DHX37	GEXP	12	125431370	125473667	6624333	20.4	28.7	0.375	833
N:CNVR:12q24.33:chr12:132143000:132152999::	chr12:132,143,000-132,152,999 (10Mb, 12q24.33)	CNVR	12	132143000	132152999	N:GEXP:DHX37:chr12:125431370:125473667:-:57647	DHX37	GEXP	12	125431370	125473667	6669333	20.2	28.5	0.373	833
N:CNVR:12q24.33:chr12:131774000:131774999::	chr12:131,774,000-131,774,999 (100kb, 12q24.33)	CNVR	12	131774000	131774999	N:GEXP:DHX37:chr12:125431370:125473667:-:57647	DHX37	GEXP	12	125431370	125473667	6300333	19.9	28.2	0.372	827
N:CNVR:12q24.33:chr12:131794000:131796999::	chr12:131,794,000-131,796,999 (3Mb, 12q24.33)	CNVR	12	131794000	131796999	N:GEXP:DHX37:chr12:125431370:125473667:-:57647	DHX37	GEXP	12	125431370	125473667	6320333	19.8	28.1	0.371	833
N:CNVR:12q24.33:chr12:131773000:131773999::	chr12:131,773,000-131,773,999 (100kb, 12q24.33)	CNVR	12	131773000	131773999	N:GEXP:DHX37:chr12:125431370:125473667:-:57647	DHX37	GEXP	12	125431370	125473667	6299333	19.8	28.1	0.371	833
N:CNVR:12q24.33:chr12:132099000:132119999::	chr12:132,099,000-132,119,999 (21Mb, 12q24.33)	CNVR	12	132099000	132119999	N:GEXP:DHX37:chr12:125431370:125473667:-:57647	DHX37	GEXP	12	125431370	125473667	6625333	19.8	28.1	0.371	833
N:CNVR:12q24.32:chr12:127373000:127373999::	chr12:127,373,000-127,373,999 (100kb, 12q24.32)	CNVR	12	127373000	127373999	N:GEXP:DHX37:chr12:125431370:125473667:-:57647	DHX37	GEXP	12	125431370	125473667	1899333	19.6	27.9	0.37	833
N:CNVR:BC042649:chr12:131776000:131793999::	chr12:131,776,000-131,793,999 (18Mb, BC042649)	CNVR	12	131776000	131793999	N:GEXP:DHX37:chr12:125431370:125473667:-:57647	DHX37	GEXP	12	125431370	125473667	6302333	19.5	27.8	0.368	833
N:CNVR:12q24.32:chr12:126994000:126994999::	chr12:126,994,000-126,994,999 (100kb, 12q24.32)	CNVR	12	126994000	126994999	N:GEXP:DHX37:chr12:125431370:125473667:-:57647	DHX37	GEXP	12	125431370	125473667	1520333	19.2	27.5	0.367	833
N:CNVR:TMEM132D:chr12:130299000:130303999::	chr12:130,299,000-130,303,999 (5Mb, TMEM132D)	CNVR	12	130299000	130303999	N:GEXP:DHX37:chr12:125431370:125473667:-:57647	DHX37	GEXP	12	125431370	125473667	4825333	19.1	27.4	0.366	833
N:CNVR:12q24.32:chr12:129229000:129229999::	chr12:129,229,000-129,229,999 (100kb, 12q24.32)	CNVR	12	129229000	129229999	N:GEXP:DHX37:chr12:125431370:125473667:-:57647	DHX37	GEXP	12	125431370	125473667	3755333	19.1	27.4	0.374	794
N:CNVR:12q24.33:chr12:131775000:131775999::	chr12:131,775,000-131,775,999 (100kb, 12q24.33)	CNVR	12	131775000	131775999	N:GEXP:DHX37:chr12:125431370:125473667:-:57647	DHX37	GEXP	12	125431370	125473667	6301333	18.9	27.2	0.365	833
N:CNVR:12q24.32:chr12:126995000:127004999::	chr12:126,995,000-127,004,999 (10Mb, 12q24.32)	CNVR	12	126995000	127004999	N:GEXP:DHX37:chr12:125431370:125473667:-:57647	DHX37	GEXP	12	125431370	125473667	1521333	18.8	27.1	0.364	833
N:CNVR:TMEM132D:chr12:130304000:130304999::	chr12:130,304,000-130,304,999 (100kb, TMEM132D)	CNVR	12	130304000	130304999	N:GEXP:DHX37:chr12:125431370:125473667:-:57647	DHX37	GEXP	12	125431370	125473667	4830333	18.8	27.1	0.364	833
N:CNVR:12q24.33:chr12:130447000:130450999::	chr12:130,447,000-130,450,999 (4Mb, 12q24.33)	CNVR	12	130447000	130450999	N:GEXP:DHX37:chr12:125431370:125473667:-:57647	DHX37	GEXP	12	125431370	125473667	4973333	18.8	27	0.364	833
N:CNVR:12q24.32:chr12:127575000:127585999::	chr12:127,575,000-127,585,999 (11Mb, 12q24.32)	CNVR	12	127575000	127585999	N:GEXP:DHX37:chr12:125431370:125473667:-:57647	DHX37	GEXP	12	125431370	125473667	2101333	18.6	26.9	0.363	833
N:CNVR:KSR2:chr12:118049000:118050999::	chr12:118,049,000-118,050,999 (2Mb, KSR2)	CNVR	12	118049000	118050999	N:GEXP:DHX37:chr12:125431370:125473667:-:57647	DHX37	GEXP	12	125431370	125473667	7380371	18.2	26.5	0.36	833
N:CNVR:KSR2:chr12:118051000:118051999::	chr12:118,051,000-118,051,999 (100kb, KSR2)	CNVR	12	118051000	118051999	N:GEXP:DHX37:chr12:125431370:125473667:-:57647	DHX37	GEXP	12	125431370	125473667	7379371	17.9	26.2	0.358	833
N:CNVR:12q24.33:chr12:132120000:132120999::	chr12:132,120,000-132,120,999 (100kb, 12q24.33)	CNVR	12	132120000	132120999	N:GEXP:DHX37:chr12:125431370:125473667:-:57647	DHX37	GEXP	12	125431370	125473667	6646333	17.6	25.9	0.356	833
C:CNVR:12q24.31:chr12:124802639:125054934::Gistic_ROI_d_del	12q24.31 Deletion (Gistic, discrete)	CNVR	12	124802639	125054934	N:GEXP:DHX37:chr12:125431370:125473667:-:57647	DHX37	GEXP	12	125431370	125473667	376436	11.6	17.6		824
C:CNVR:12q15:chr12:69730460:69750838::Gistic_ROI_d_amp	12q15 Amplification (Gistic, discrete)	CNVR	12	69730460	69750838	N:GEXP:DHX37:chr12:125431370:125473667:-:57647	DHX37	GEXP	12	125431370	125473667	55680532	3.7	9.7		824
N:GEXP:DHX37:chr12:125431370:125473667:-:57647	DHX37	GEXP	12	125431370	125473667	N:MIRN:HSA-MIR-17:chr13:92002859:92002942:+:	HSA-MIR-17	MIRN	13	92002859	92002942	500000000	1.9	8.9	0.206	824
C:CNVR:12p13.33:chr12:1:922391::Gistic_ROI_d_amp	12p13.33 Amplification (Gistic, discrete)	CNVR	12	1	922391	N:GEXP:DHX37:chr12:125431370:125473667:-:57647	DHX37	GEXP	12	125431370	125473667	124508979	2.6	8.6		824
N:GEXP:DHX37:chr12:125431370:125473667:-:57647	DHX37	GEXP	12	125431370	125473667	N:MIRN:HSA-MIR-20A:chr13:92003319:92003389:+:	HSA-MIR-20A	MIRN	13	92003319	92003389	500000000	1.4	8.3	0.198	824
Table4.BLCA
id_a	pretty_label_a	datatype_a	chr_a	start_a	end_a	id_b	pretty_label_b	datatype_b	chr_b	start_b	end_b	link_distance	adj_logged_pvalue	logged_pvalue	correlation	num_nonna
N:GEXP:DDX54:chr12:113594978:113623284:-:79039	DDX54	GEXP	12	113594978	113623284	N:GEXP:DHX37:chr12:125431370:125473667:-:57647	DHX37	GEXP	12	125431370	125473667	11808086	7.8	15.9	0.62	144
N:GEXP:DHX37:chr12:125431370:125473667:-:57647	DHX37	GEXP	12	125431370	125473667	N:GEXP:TTF2:chr1:117602949:117645491:+:8458	TTF2	GEXP	1	117602949	117645491	500000000	6.9	15	0.604	144
N:GEXP:DHX37:chr12:125431370:125473667:-:57647	DHX37	GEXP	12	125431370	125473667	N:GEXP:NOC4L:chr12:132628993:132636986:+:79050	NOC4L	GEXP	12	132628993	132636986	7155326	6.6	14.7	0.599	144
N:GEXP:DHX37:chr12:125431370:125473667:-:57647	DHX37	GEXP	12	125431370	125473667	N:GEXP:EFTUD2:chr17:42927655:42976993:-:9343	EFTUD2	GEXP	17	42927655	42976993	500000000	6.5	14.5	0.597	144
N:GEXP:DHX37:chr12:125431370:125473667:-:57647	DHX37	GEXP	12	125431370	125473667	N:GEXP:SMARCD1:chr12:50478983:50494494:+:6602	SMARCD1	GEXP	12	50478983	50494494	74936876	6.2	14.3	0.593	144
N:GEXP:DHX37:chr12:125431370:125473667:-:57647	DHX37	GEXP	12	125431370	125473667	N:GEXP:LMNB2:chr19:2428164:2456958:-:84823	LMNB2	GEXP	19	2428164	2456958	500000000	5.8	13.8	0.585	144
N:GEXP:DHX37:chr12:125431370:125473667:-:57647	DHX37	GEXP	12	125431370	125473667	N:GEXP:PES1:chr22:30972612:31003000:-:23481	PES1	GEXP	22	30972612	31003000	500000000	5.5	13.6	0.58	144
N:GEXP:DHX37:chr12:125431370:125473667:-:57647	DHX37	GEXP	12	125431370	125473667	N:GEXP:TIMELESS:chr12:56810157:56843200:-:8914	TIMELESS	GEXP	12	56810157	56843200	68588170	5.4	13.5	0.578	144
N:GEXP:DHX37:chr12:125431370:125473667:-:57647	DHX37	GEXP	12	125431370	125473667	N:GEXP:VARS:chr6:31745297:31763712:-:7407	VARS	GEXP	6	31745297	31763712	500000000	4.8	12.9	0.567	144
N:GEXP:CDC45:chr22:19467414:19508135:+:8318	CDC45	GEXP	22	19467414	19508135	N:GEXP:DHX37:chr12:125431370:125473667:-:57647	DHX37	GEXP	12	125431370	125473667	500000000	4.5	12.6	0.562	144
N:GEXP:DHX37:chr12:125431370:125473667:-:57647	DHX37	GEXP	12	125431370	125473667	N:GEXP:RAN:chr12:131356617:131360826:+:5901	RAN	GEXP	12	131356617	131360826	5882950	4.5	12.5	0.56	144
N:GEXP:DENR:chr12:123237371:123255953:+:8562	DENR	GEXP	12	123237371	123255953	N:GEXP:DHX37:chr12:125431370:125473667:-:57647	DHX37	GEXP	12	125431370	125473667	2175417	4.2	12.2	0.554	144
N:GEXP:DHX37:chr12:125431370:125473667:-:57647	DHX37	GEXP	12	125431370	125473667	N:GEXP:STIP1:chr11:63953587:63972020:+:10963	STIP1	GEXP	11	63953587	63972020	500000000	4.1	12.1	0.552	144
N:GEXP:DHX37:chr12:125431370:125473667:-:57647	DHX37	GEXP	12	125431370	125473667	N:GEXP:PGAM5:chr12:133264635:133299323:+:192111	PGAM5	GEXP	12	133264635	133299323	7790968	3.9	12	0.55	144
N:GEXP:DHX37:chr12:125431370:125473667:-:57647	DHX37	GEXP	12	125431370	125473667	N:GEXP:NLE1:chr17:33458368:33469322:-:54475	NLE1	GEXP	17	33458368	33469322	500000000	3.9	11.9	0.548	144
N:GEXP:DHX37:chr12:125431370:125473667:-:57647	DHX37	GEXP	12	125431370	125473667	N:GEXP:UTP20:chr12:101673905:101780397:+:27340	UTP20	GEXP	12	101673905	101780397	23650973	3.7	11.8	0.545	144
N:GEXP:DHX37:chr12:125431370:125473667:-:57647	DHX37	GEXP	12	125431370	125473667	N:GEXP:UTP6:chr17:30190190:30228729:-:55813	UTP6	GEXP	17	30190190	30228729	500000000	3.6	11.7	0.544	144
N:GEXP:C17ORF53:chr17:42219274:42239844:+:78995	C17ORF53	GEXP	17	42219274	42239844	N:GEXP:DHX37:chr12:125431370:125473667:-:57647	DHX37	GEXP	12	125431370	125473667	500000000	3.6	11.7	0.542	144
N:GEXP:DHX37:chr12:125431370:125473667:-:57647	DHX37	GEXP	12	125431370	125473667	N:GEXP:TRIM28:chr19:59055836:59062082:+:10155	TRIM28	GEXP	19	59055836	59062082	500000000	3.6	11.7	0.543	144
N:GEXP:C10ORF2:chr10:102747293:102754158:+:56652	C10ORF2	GEXP	10	102747293	102754158	N:GEXP:DHX37:chr12:125431370:125473667:-:57647	DHX37	GEXP	12	125431370	125473667	500000000	3.5	11.6	0.54	144
N:GEXP:DHX37:chr12:125431370:125473667:-:57647	DHX37	GEXP	12	125431370	125473667	N:GEXP:POLD1:chr19:50887593:50921271:+:5424	POLD1	GEXP	19	50887593	50921271	500000000	3.4	11.5	0.539	144
N:GEXP:BIRC5:chr17:76210277:76221716:+:332	BIRC5	GEXP	17	76210277	76221716	N:GEXP:DHX37:chr12:125431370:125473667:-:57647	DHX37	GEXP	12	125431370	125473667	500000000	3.3	11.4	0.536	144
N:GEXP:DHX37:chr12:125431370:125473667:-:57647	DHX37	GEXP	12	125431370	125473667	N:GEXP:HEATR1:chr1:236712305:236767841:-:55127	HEATR1	GEXP	1	236712305	236767841	500000000	3.2	11.3	0.534	144
N:GEXP:DHX37:chr12:125431370:125473667:-:57647	DHX37	GEXP	12	125431370	125473667	N:GEXP:NPLOC4:chr17:79523913:79604138:-:55666	NPLOC4	GEXP	17	79523913	79604138	500000000	3.2	11.3	0.534	144
N:GEXP:CAD:chr2:27440258:27466654:+:790	CAD	GEXP	2	27440258	27466654	N:GEXP:DHX37:chr12:125431370:125473667:-:57647	DHX37	GEXP	12	125431370	125473667	500000000	3.2	11.3	0.535	144
N:GEXP:BRCA1:chr17:41196312:41322420:-:672	BRCA1	GEXP	17	41196312	41322420	N:GEXP:DHX37:chr12:125431370:125473667:-:57647	DHX37	GEXP	12	125431370	125473667	500000000	3.2	11.2	0.533	144
N:GEXP:DHX37:chr12:125431370:125473667:-:57647	DHX37	GEXP	12	125431370	125473667	N:GEXP:DKC1:chrX:153991031:154005964:+:1736	DKC1	GEXP	X	153991031	154005964	500000000	3.1	11.2	0.533	144
N:GEXP:DHX37:chr12:125431370:125473667:-:57647	DHX37	GEXP	12	125431370	125473667	N:GEXP:IPO4:chr14:24649425:24659859:-:79711	IPO4	GEXP	14	24649425	24659859	500000000	3	11.1	0.531	144
N:GEXP:DHX37:chr12:125431370:125473667:-:57647	DHX37	GEXP	12	125431370	125473667	N:GEXP:DPH2:chr1:44435653:44439043:+:1802	DPH2	GEXP	1	44435653	44439043	500000000	3.1	11.1	0.531	144
N:GEXP:DHX37:chr12:125431370:125473667:-:57647	DHX37	GEXP	12	125431370	125473667	N:GEXP:GCN1L1:chr12:120565014:120632513:-:10985	GCN1L1	GEXP	12	120565014	120632513	4798857	3	11.1	0.53	144
N:GEXP:DHX37:chr12:125431370:125473667:-:57647	DHX37	GEXP	12	125431370	125473667	N:GEXP:PUS1:chr12:132413745:132428406:+:80324	PUS1	GEXP	12	132413745	132428406	6940078	2.9	11	0.529	144
N:GEXP:DHX37:chr12:125431370:125473667:-:57647	DHX37	GEXP	12	125431370	125473667	N:GEXP:GRWD1:chr19:48949030:48960278:+:83743	GRWD1	GEXP	19	48949030	48960278	500000000	2.7	10.8	0.524	144
N:GEXP:DHX37:chr12:125431370:125473667:-:57647	DHX37	GEXP	12	125431370	125473667	N:GEXP:NPHP4:chr1:5922870:6052533:-:261734	NPHP4	GEXP	1	5922870	6052533	500000000	2.7	10.8	0.523	144
N:GEXP:DHX37:chr12:125431370:125473667:-:57647	DHX37	GEXP	12	125431370	125473667	N:GEXP:TFAP4:chr16:4307187:4323001:-:7023	TFAP4	GEXP	16	4307187	4323001	500000000	2.5	10.6	0.518	144
N:GEXP:AURKB:chr17:8108049:8113883:-:9212	AURKB	GEXP	17	8108049	8113883	N:GEXP:DHX37:chr12:125431370:125473667:-:57647	DHX37	GEXP	12	125431370	125473667	500000000	2.3	10.4	0.515	144
N:GEXP:DHX37:chr12:125431370:125473667:-:57647	DHX37	GEXP	12	125431370	125473667	N:METH:MIR19A:chr13:92001959:::cg07641807	MIR19A cg07641807	METH	13	92001959		500000000	0.5	9	-0.483	142
N:GEXP:DHX37:chr12:125431370:125473667:-:57647	DHX37	GEXP	12	125431370	125473667	N:MIRN:HSA-MIR-942:chr1:117637265:117637350:+:	HSA-MIR-942	MIRN	1	117637265	117637350	500000000	0.5	8.1	0.459	144
N:GEXP:DHX37:chr12:125431370:125473667:-:57647	DHX37	GEXP	12	125431370	125473667	N:MIRN:HSA-MIR-942:chr1:117637265:117637350:+:MIMAT0004985	HSA-MIR-942	MIRN	1	117637265	117637350	500000000	0.1	7.7	0.446	144
N:GEXP:DHX37:chr12:125431370:125473667:-:57647	DHX37	GEXP	12	125431370	125473667	N:MIRN:HSA-MIR-3682-3P:chr2:54076259:54076342:+:mature	HSA-MIR-3682-3P	MIRN	2	54076259	54076342	500000000	0.1	7.7	0.447	144
N:GEXP:DHX37:chr12:125431370:125473667:-:57647	DHX37	GEXP	12	125431370	125473667	N:MIRN:HSA-MIR-3682:chr2:54076259:54076342:+:	HSA-MIR-3682	MIRN	2	54076259	54076342	500000000	0	7.3	0.435	144
N:GEXP:DHX37:chr12:125431370:125473667:-:57647	DHX37	GEXP	12	125431370	125473667	N:MIRN:HSA-MIR-3682:chr2:54076259:54076342:+:MIMAT0018110	HSA-MIR-3682	MIRN	2	54076259	54076342	500000000	0	7.3	0.434	144
N:GEXP:DHX37:chr12:125431370:125473667:-:57647	DHX37	GEXP	12	125431370	125473667	N:MIRN:HSA-MIR-18A:chr13:92003005:92003075:+:MIMAT0002891	HSA-MIR-18A	MIRN	13	92003005	92003075	500000000	0	7.2	0.433	144
N:GEXP:DHX37:chr12:125431370:125473667:-:57647	DHX37	GEXP	12	125431370	125473667	N:MIRN:HSA-MIR-942:chr1:117637265:117637350:+:mature	HSA-MIR-942	MIRN	1	117637265	117637350	500000000	0	7.1	0.429	144
N:GEXP:DHX37:chr12:125431370:125473667:-:57647	DHX37	GEXP	12	125431370	125473667	N:MIRN:HSA-MIR-7-3:chr19:4770682:4770791:+:	HSA-MIR-7-3	MIRN	19	4770682	4770791	500000000	0	6.8	0.419	144
N:GEXP:DHX37:chr12:125431370:125473667:-:57647	DHX37	GEXP	12	125431370	125473667	N:MIRN:HSA-MIR-3615:chr17:72744752:72744838:+:	HSA-MIR-3615	MIRN	17	72744752	72744838	500000000	0	6.6	0.412	144
N:GEXP:DHX37:chr12:125431370:125473667:-:57647	DHX37	GEXP	12	125431370	125473667	N:MIRN:HSA-MIR-19A:chr13:92003145:92003226:+:MIMAT0000073	HSA-MIR-19A	MIRN	13	92003145	92003226	500000000	0	6.5	0.412	144
N:GEXP:DHX37:chr12:125431370:125473667:-:57647	DHX37	GEXP	12	125431370	125473667	N:MIRN:HSA-MIR-3615:chr17:72744752:72744838:+:MIMAT0017994	HSA-MIR-3615	MIRN	17	72744752	72744838	500000000	0	6.4	0.407	144
N:GEXP:DHX37:chr12:125431370:125473667:-:57647	DHX37	GEXP	12	125431370	125473667	N:MIRN:HSA-MIR-19A:chr13:92003145:92003226:+:	HSA-MIR-19A	MIRN	13	92003145	92003226	500000000	0	6.4	0.407	144
N:GEXP:DHX37:chr12:125431370:125473667:-:57647	DHX37	GEXP	12	125431370	125473667	N:MIRN:HSA-MIR-7-5P:chr15:89155056:89155165:+:mature	HSA-MIR-7-5P	MIRN	15	89155056	89155165	500000000	0	6.4	0.407	144
N:GEXP:DHX37:chr12:125431370:125473667:-:57647	DHX37	GEXP	12	125431370	125473667	N:MIRN:HSA-MIR-185:chr22:20020662:20020743:+:MIMAT0000455	HSA-MIR-185	MIRN	22	20020662	20020743	500000000	0	6.3	0.404	144
N:GEXP:DHX37:chr12:125431370:125473667:-:57647	DHX37	GEXP	12	125431370	125473667	N:MIRN:HSA-MIR-185-5P:chr22:20020662:20020743:+:mature	HSA-MIR-185-5P	MIRN	22	20020662	20020743	500000000	0	6.2	0.4	144
N:GEXP:DHX37:chr12:125431370:125473667:-:57647	DHX37	GEXP	12	125431370	125473667	N:MIRN:HSA-MIR-590-3P:chr7:73605528:73605624:+:mature	HSA-MIR-590-3P	MIRN	7	73605528	73605624	500000000	0	6.1	0.397	144
N:GEXP:DHX37:chr12:125431370:125473667:-:57647	DHX37	GEXP	12	125431370	125473667	N:MIRN:HSA-MIR-505-3P:chrX:139006307:139006390:+:mature	HSA-MIR-505-3P	MIRN	X	139006307	139006390	500000000	0	6.1	0.398	144
N:GEXP:DHX37:chr12:125431370:125473667:-:57647	DHX37	GEXP	12	125431370	125473667	N:MIRN:HSA-MIR-185:chr22:20020662:20020743:+:	HSA-MIR-185	MIRN	22	20020662	20020743	500000000	0	6.1	0.397	144
N:GEXP:DHX37:chr12:125431370:125473667:-:57647	DHX37	GEXP	12	125431370	125473667	N:MIRN:HSA-MIR-7-2:chr15:89155056:89155165:+:	HSA-MIR-7-2	MIRN	15	89155056	89155165	500000000	0	6.1	0.398	144
N:GEXP:DHX37:chr12:125431370:125473667:-:57647	DHX37	GEXP	12	125431370	125473667	N:MIRN:HSA-MIR-7-1:chr9:86584663:86584772:+:	HSA-MIR-7-1	MIRN	9	86584663	86584772	500000000	0	6.1	0.397	144
Table5.LIHC
id_a	pretty_label_a	datatype_a	chr_a	start_a	end_a	id_b	pretty_label_b	datatype_b	chr_b	start_b	end_b	link_distance	adj_logged_pvalue	logged_pvalue	correlation	num_nonna
N:GEXP:DHX37:chr12:125431370:125473667:-:57647	DHX37	GEXP	12	125431370	125473667	N:GEXP:GCN1L1:chr12:120565014:120632513:-:10985	GCN1L1	GEXP	12	120565014	120632513	4798857	14.1	22.2	0.63	193
N:GEXP:DHX37:chr12:125431370:125473667:-:57647	DHX37	GEXP	12	125431370	125473667	N:GEXP:RBM19:chr12:114254543:114404176:-:9904	RBM19	GEXP	12	114254543	114404176	11027194	13.9	22.1	0.63	193
N:GEXP:DHX37:chr12:125431370:125473667:-:57647	DHX37	GEXP	12	125431370	125473667	N:GEXP:RAN:chr12:131356617:131360826:+:5901	RAN	GEXP	12	131356617	131360826	5882950	10.9	19	0.59	193
N:GEXP:DHX37:chr12:125431370:125473667:-:57647	DHX37	GEXP	12	125431370	125473667	N:GEXP:RRP12:chr10:99116458:99161127:-:23223	RRP12	GEXP	10	99116458	99161127	500000000	8.9	17.1	0.57	193
N:GEXP:CYP2C8:chr10:96796529:96829254:-:1558	CYP2C8	GEXP	10	96796529	96829254	N:GEXP:DHX37:chr12:125431370:125473667:-:57647	DHX37	GEXP	12	125431370	125473667	500000000	8.8	16.9	-0.56	193
N:GEXP:DHX37:chr12:125431370:125473667:-:57647	DHX37	GEXP	12	125431370	125473667	N:GEXP:G6PD:chrX:153759606:153775787:-:2539	G6PD	GEXP	X	153759606	153775787	500000000	8.3	16.5	0.56	193
N:CNVR:12q24.31:chr12:125277000:125457999::	chr12:125,277,000-125,457,999 (181Mb, 12q24.31)	CNVR	12	125277000	125457999	N:GEXP:DHX37:chr12:125431370:125473667:-:57647	DHX37	GEXP	12	125431370	125473667	0	2.8	10.5	0.46	188
N:CNVR:12q24.31:chr12:124910000:124911999::	chr12:124,910,000-124,911,999 (2Mb, 12q24.31)	CNVR	12	124910000	124911999	N:GEXP:DHX37:chr12:125431370:125473667:-:57647	DHX37	GEXP	12	125431370	125473667	519371	2.7	10.4	0.46	188
N:CNVR:12q24.31:chr12:124735000:124735999::	chr12:124,735,000-124,735,999 (100kb, 12q24.31)	CNVR	12	124735000	124735999	N:GEXP:DHX37:chr12:125431370:125473667:-:57647	DHX37	GEXP	12	125431370	125473667	695371	2.6	10.3	0.46	188
N:CNVR:12q24.31:chr12:125246000:125276999::	chr12:125,246,000-125,276,999 (31Mb, 12q24.31)	CNVR	12	125246000	125276999	N:GEXP:DHX37:chr12:125431370:125473667:-:57647	DHX37	GEXP	12	125431370	125473667	154371	2.5	10.3	0.45	188
N:CNVR:12q24.31:chr12:125159000:125245999::	chr12:125,159,000-125,245,999 (87Mb, 12q24.31)	CNVR	12	125159000	125245999	N:GEXP:DHX37:chr12:125431370:125473667:-:57647	DHX37	GEXP	12	125431370	125473667	185371	2.4	10.2	0.45	188
N:CNVR:12q24.31:chr12:124912000:125154999::	chr12:124,912,000-125,154,999 (243Mb, 12q24.31)	CNVR	12	124912000	125154999	N:GEXP:DHX37:chr12:125431370:125473667:-:57647	DHX37	GEXP	12	125431370	125473667	276371	2.5	10.2	0.45	188
N:CNVR:12q24.31:chr12:125157000:125157999::	chr12:125,157,000-125,157,999 (100kb, 12q24.31)	CNVR	12	125157000	125157999	N:GEXP:DHX37:chr12:125431370:125473667:-:57647	DHX37	GEXP	12	125431370	125473667	273371	2.3	10.1	0.45	188
N:CNVR:12q24.31:chr12:125158000:125158999::	chr12:125,158,000-125,158,999 (100kb, 12q24.31)	CNVR	12	125158000	125158999	N:GEXP:DHX37:chr12:125431370:125473667:-:57647	DHX37	GEXP	12	125431370	125473667	272371	2.3	10.1	0.45	188
N:CNVR:12q24.31:chr12:124736000:124909999::	chr12:124,736,000-124,909,999 (174Mb, 12q24.31)	CNVR	12	124736000	124909999	N:GEXP:DHX37:chr12:125431370:125473667:-:57647	DHX37	GEXP	12	125431370	125473667	521371	2.3	10.1	0.45	188
N:CNVR:12q24.31:chr12:125155000:125155999::	chr12:125,155,000-125,155,999 (100kb, 12q24.31)	CNVR	12	125155000	125155999	N:GEXP:DHX37:chr12:125431370:125473667:-:57647	DHX37	GEXP	12	125431370	125473667	275371	2.3	10.1	0.45	188
N:CNVR:12q24.31:chr12:125156000:125156999::	chr12:125,156,000-125,156,999 (100kb, 12q24.31)	CNVR	12	125156000	125156999	N:GEXP:DHX37:chr12:125431370:125473667:-:57647	DHX37	GEXP	12	125431370	125473667	274371	2.3	10.1	0.45	188
N:CNVR:12q24.31:chr12:123200000:124734999::	chr12:123,200,000-124,734,999 (2bp, 12q24.31)	CNVR	12	123200000	124734999	N:GEXP:DHX37:chr12:125431370:125473667:-:57647	DHX37	GEXP	12	125431370	125473667	696371	2.2	9.9	0.45	188
N:CNVR:12q24.3:chr12:125458000:126126999::	chr12:125,458,000-126,126,999 (669Mb, 12q24.3)	CNVR	12	125458000	126126999	N:GEXP:DHX37:chr12:125431370:125473667:-:57647	DHX37	GEXP	12	125431370	125473667	0	2	9.7	0.44	188
N:CNVR:12q24.32:chr12:126127000:126127999::	chr12:126,127,000-126,127,999 (100kb, 12q24.32)	CNVR	12	126127000	126127999	N:GEXP:DHX37:chr12:125431370:125473667:-:57647	DHX37	GEXP	12	125431370	125473667	653333	1.9	9.6	0.44	188
N:CNVR:12q24.32:chr12:128192000:128727999::	chr12:128,192,000-128,727,999 (536Mb, 12q24.32)	CNVR	12	128192000	128727999	N:GEXP:DHX37:chr12:125431370:125473667:-:57647	DHX37	GEXP	12	125431370	125473667	2718333	1.9	9.6	0.44	188
N:CNVR:12q24.3:chr12:128728000:131903999::	chr12:128,728,000-131,903,999 (3bp, 12q24.3)	CNVR	12	128728000	131903999	N:GEXP:DHX37:chr12:125431370:125473667:-:57647	DHX37	GEXP	12	125431370	125473667	3254333	1.8	9.5	0.44	188
N:CNVR:12q24.32:chr12:126128000:128191999::	chr12:126,128,000-128,191,999 (2bp, 12q24.32)	CNVR	12	126128000	128191999	N:GEXP:DHX37:chr12:125431370:125473667:-:57647	DHX37	GEXP	12	125431370	125473667	654333	1.8	9.5	0.44	188
N:CNVR:12q24.33:chr12:131904000:133161000::	chr12:131,904,000-133,161,000 (1bp, 12q24.33)	CNVR	12	131904000	133161000	N:GEXP:DHX37:chr12:125431370:125473667:-:57647	DHX37	GEXP	12	125431370	125473667	6430333	1.5	9.2	0.43	188
N:GEXP:DHX37:chr12:125431370:125473667:-:57647	DHX37	GEXP	12	125431370	125473667	N:SAMP:RS65_Score:::::	RS65_Score	SAMP				500000000	3.2	9.2	0.43	193
N:CNVR:12q24.33:chr12:133155339:133851895::LIHC-All_Samples_Gistic_ROI_r_del	12q24.33 Deletion (Gistic, continuous)	CNVR	12	133155339	133851895	N:GEXP:DHX37:chr12:125431370:125473667:-:57647	DHX37	GEXP	12	125431370	125473667	7681672	0.7	8.4	0.41	187
N:GEXP:DHX37:chr12:125431370:125473667:-:57647	DHX37	GEXP	12	125431370	125473667	N:MIRN:hsa-miR-139-5p:chr11:72326107:72326174:+:MIMAT0000250	hsa-miR-139-5p	MIRN	11	72326107	72326174	500000000	1.2	8.2	-0.41	189
N:CNVR:12q24.31:chr12:122652000:123199999::	chr12:122,652,000-123,199,999 (548Mb, 12q24.31)	CNVR	12	122652000	123199999	N:GEXP:DHX37:chr12:125431370:125473667:-:57647	DHX37	GEXP	12	125431370	125473667	2231371	0.4	8.1	0.41	188
N:CNVR:12q24.31:chr12:122651000:122651999::	chr12:122,651,000-122,651,999 (100kb, 12q24.31)	CNVR	12	122651000	122651999	N:GEXP:DHX37:chr12:125431370:125473667:-:57647	DHX37	GEXP	12	125431370	125473667	2779371	0	7.7	0.39	188
N:GEXP:DHX37:chr12:125431370:125473667:-:57647	DHX37	GEXP	12	125431370	125473667	N:MIRN:hsa-miR-24-1-5p:chr9:97848303:97848370:+:MIMAT0000079	hsa-miR-24-1-5p	MIRN	9	97848303	97848370	500000000	0.6	7.7	-0.39	189
N:CNVR:12q24.31:chr12:121646000:121652999::	chr12:121,646,000-121,652,999 (7Mb, 12q24.31)	CNVR	12	121646000	121652999	N:GEXP:DHX37:chr12:125431370:125473667:-:57647	DHX37	GEXP	12	125431370	125473667	3778371	0	7.6	0.39	188
N:GEXP:DHX37:chr12:125431370:125473667:-:57647	DHX37	GEXP	12	125431370	125473667	B:SAMP:I(C2|Hoshida_cluster):::::	Hoshida_cluster C2	SAMP				500000000	0.5	7.5	0.4	193
N:GEXP:DHX37:chr12:125431370:125473667:-:57647	DHX37	GEXP	12	125431370	125473667	N:MIRN:hsa-miR-125b-5p:chr11:121970465:121970552:+:MIMAT0000423	hsa-miR-125b-5p	MIRN	11	121970465	121970552	500000000	0.3	7.4	-0.39	189
N:GEXP:DHX37:chr12:125431370:125473667:-:57647	DHX37	GEXP	12	125431370	125473667	N:MIRN:hsa-miR-21-5p:chr17:57918627:57918698:+:MIMAT0000076	hsa-miR-21-5p	MIRN	17	57918627	57918698	500000000	0.2	7.3	0.38	189
N:CNVR:12q24.31:chr12:121653000:122650999::	chr12:121,653,000-122,650,999 (998Mb, 12q24.31)	CNVR	12	121653000	122650999	N:GEXP:DHX37:chr12:125431370:125473667:-:57647	DHX37	GEXP	12	125431370	125473667	2780371	0	7.3	0.39	188
N:GEXP:DHX37:chr12:125431370:125473667:-:57647	DHX37	GEXP	12	125431370	125473667	C:SAMP:NCIP_cluster:::::	NCIP_cluster	SAMP				500000000	1.4	7.2	-0.39	193
N:GEXP:DHX37:chr12:125431370:125473667:-:57647	DHX37	GEXP	12	125431370	125473667	B:SAMP:I(C2,C3|Hoshida_cluster):::::	Hoshida_cluster C2 vs C3	SAMP				500000000	0.3	7.2	0.42	165
N:GEXP:DHX37:chr12:125431370:125473667:-:57647	DHX37	GEXP	12	125431370	125473667	B:SAMP:I(B|NCIP_cluster):::::	NCIP_cluster B	SAMP				500000000	0.2	7.2	-0.39	193
N:GEXP:DHX37:chr12:125431370:125473667:-:57647	DHX37	GEXP	12	125431370	125473667	B:SAMP:I(A|NCIP_cluster):::::	NCIP_cluster A	SAMP				500000000	0.2	7.2	0.39	193
N:GEXP:DHX37:chr12:125431370:125473667:-:57647	DHX37	GEXP	12	125431370	125473667	N:RPPA:LCK:chr1:32716840:32751766:+:Lck-R-V_bc	LCK	RPPA	1	32716840	32751766	500000000	0.1	7	0.41	159
N:GEXP:DHX37:chr12:125431370:125473667:-:57647	DHX37	GEXP	12	125431370	125473667	N:MIRN:hsa-miR-629-5p:chr15:70371711:70371807:+:MIMAT0004810	hsa-miR-629-5p	MIRN	15	70371711	70371807	500000000	0	6.9	0.37	189
N:GEXP:DHX37:chr12:125431370:125473667:-:57647	DHX37	GEXP	12	125431370	125473667	N:MIRN:hsa-miR-3922-3p:chr12:104985411:104985494:+:MIMAT0018197	hsa-miR-3922-3p	MIRN	12	104985411	104985494	20445876	0	6.9	0.37	189
N:GEXP:DHX37:chr12:125431370:125473667:-:57647	DHX37	GEXP	12	125431370	125473667	N:RPPA:LCK:chr1:32716840:32751766:+:Lck	LCK	RPPA	1	32716840	32751766	500000000	0.1	6.9	0.41	159
N:GEXP:DHX37:chr12:125431370:125473667:-:57647	DHX37	GEXP	12	125431370	125473667	C:SAMP:Hoshida_cluster:::::	Hoshida_cluster	SAMP				500000000	1	6.8	0	193
N:GEXP:DHX37:chr12:125431370:125473667:-:57647	DHX37	GEXP	12	125431370	125473667	N:MIRN:hsa-miR-3677-3p:chr16:2320714:2320773:+:MIMAT0018101	hsa-miR-3677-3p	MIRN	16	2320714	2320773	500000000	0	6.6	0.36	189
N:CNVR:12q24.22:chr12:116957000:116958999::	chr12:116,957,000-116,958,999 (2Mb, 12q24.22)	CNVR	12	116957000	116958999	N:GEXP:DHX37:chr12:125431370:125473667:-:57647	DHX37	GEXP	12	125431370	125473667	8472371	0	6.6	0.36	188
N:CNVR:15q23:chr15:71168000:71174999::	chr15:71,168,000-71,174,999 (7Mb, 15q23)	CNVR	15	71168000	71174999	N:GEXP:DHX37:chr12:125431370:125473667:-:57647	DHX37	GEXP	12	125431370	125473667	500000000	0	6.6	-0.36	188
N:CNVR:12q24:chr12:116959000:121645999::	chr12:116,959,000-121,645,999 (5bp, 12q24)	CNVR	12	116959000	121645999	N:GEXP:DHX37:chr12:125431370:125473667:-:57647	DHX37	GEXP	12	125431370	125473667	3785371	0	6.5	0.36	188
N:CNVR:12q24:chr12:113155000:116097999::	chr12:113,155,000-116,097,999 (3bp, 12q24)	CNVR	12	113155000	116097999	N:GEXP:DHX37:chr12:125431370:125473667:-:57647	DHX37	GEXP	12	125431370	125473667	9333371	0	6.5	0.36	188
N:CNVR:15q21.3:chr15:58707000:59390999::	chr15:58,707,000-59,390,999 (684Mb, 15q21.3)	CNVR	15	58707000	59390999	N:GEXP:DHX37:chr12:125431370:125473667:-:57647	DHX37	GEXP	12	125431370	125473667	500000000	0	6.4	-0.36	188
N:CNVR:12q24.21:chr12:116098000:116099999::	chr12:116,098,000-116,099,999 (2Mb, 12q24.21)	CNVR	12	116098000	116099999	N:GEXP:DHX37:chr12:125431370:125473667:-:57647	DHX37	GEXP	12	125431370	125473667	9331371	0	6.3	0.36	188
N:CNVR:15q21.3:chr15:58705000:58706999::	chr15:58,705,000-58,706,999 (2Mb, 15q21.3)	CNVR	15	58705000	58706999	N:GEXP:DHX37:chr12:125431370:125473667:-:57647	DHX37	GEXP	12	125431370	125473667	500000000	0	6.3	-0.36	188
N:GEXP:DHX37:chr12:125431370:125473667:-:57647	DHX37	GEXP	12	125431370	125473667	N:MIRN:hsa-miR-937-3p:chr8:144895127:144895212:+:MIMAT0004980	hsa-miR-937-3p	MIRN	8	144895127	144895212	500000000	0	6.3	0.36	189
N:CNVR:15q23:chr15:70402000:70405999::	chr15:70,402,000-70,405,999 (4Mb, 15q23)	CNVR	15	70402000	70405999	N:GEXP:DHX37:chr12:125431370:125473667:-:57647	DHX37	GEXP	12	125431370	125473667	500000000	0	6.3	-0.36	188
N:CNVR:15q23:chr15:69162000:70401999::	chr15:69,162,000-70,401,999 (1bp, 15q23)	CNVR	15	69162000	70401999	N:GEXP:DHX37:chr12:125431370:125473667:-:57647	DHX37	GEXP	12	125431370	125473667	500000000	0	6.3	-0.36	188
N:CNVR:12q24.1:chr12:109925000:113152999::	chr12:109,925,000-113,152,999 (3bp, 12q24.1)	CNVR	12	109925000	113152999	N:GEXP:DHX37:chr12:125431370:125473667:-:57647	DHX37	GEXP	12	125431370	125473667	12278371	0	6.2	0.35	188
N:CNVR:15q22.2:chr15:59394000:60022999::	chr15:59,394,000-60,022,999 (629Mb, 15q22.2)	CNVR	15	59394000	60022999	N:GEXP:DHX37:chr12:125431370:125473667:-:57647	DHX37	GEXP	12	125431370	125473667	500000000	0	6.2	-0.35	188
N:GEXP:DHX37:chr12:125431370:125473667:-:57647	DHX37	GEXP	12	125431370	125473667	N:RPPA:FOXO3:chr6:108881038:109005977:+:FOXO3a_pS318_S321-R-C_bc	FOXO3 (pS318)	RPPA	6	108881038	109005977	500000000	0	6.1	-0.38	159
N:CNVR:12q24.2:chr12:116100000:116956999::	chr12:116,100,000-116,956,999 (857Mb, 12q24.2)	CNVR	12	116100000	116956999	N:GEXP:DHX37:chr12:125431370:125473667:-:57647	DHX37	GEXP	12	125431370	125473667	8474371	0	6.1	0.35	188
N:CNVR:15q22.2:chr15:59391000:59393999::	chr15:59,391,000-59,393,999 (3Mb, 15q22.2)	CNVR	15	59391000	59393999	N:GEXP:DHX37:chr12:125431370:125473667:-:57647	DHX37	GEXP	12	125431370	125473667	500000000	0	6.1	-0.35	188
N:CNVR:15q21:chr15:52057000:54772999::	chr15:52,057,000-54,772,999 (3bp, 15q21)	CNVR	15	52057000	54772999	N:GEXP:DHX37:chr12:125431370:125473667:-:57647	DHX37	GEXP	12	125431370	125473667	500000000	0	6.1	-0.35	188
N:CNVR:12q24.13:chr12:113153000:113154999::	chr12:113,153,000-113,154,999 (2Mb, 12q24.13)	CNVR	12	113153000	113154999	N:GEXP:DHX37:chr12:125431370:125473667:-:57647	DHX37	GEXP	12	125431370	125473667	12276371	0	6.1	0.35	188
N:GEXP:DHX37:chr12:125431370:125473667:-:57647	DHX37	GEXP	12	125431370	125473667	C:SAMP:PARADIGM_cluster:::::	PARADIGM_cluster	SAMP				500000000	0.4	6.1	0	188
N:GEXP:DHX37:chr12:125431370:125473667:-:57647	DHX37	GEXP	12	125431370	125473667	N:RPPA:MTOR:chr1:11166592:11322564:-:mTOR_pS2448-R-C_bc	MTOR (pS2448)	RPPA	1	11166592	11322564	500000000	0	6	-0.38	159
N:GEXP:DHX37:chr12:125431370:125473667:-:57647	DHX37	GEXP	12	125431370	125473667	N:RPPA:ARAF:chrX:47420516:47431307:+:A-Raf_pS299-R-C_bc	ARAF (pS299)	RPPA	X	47420516	47431307	500000000	0	6	-0.38	159
N:CNVR:15q22.2:chr15:60024000:62917999::	chr15:60,024,000-62,917,999 (3bp, 15q22.2)	CNVR	15	60024000	62917999	N:GEXP:DHX37:chr12:125431370:125473667:-:57647	DHX37	GEXP	12	125431370	125473667	500000000	0	6	-0.35	188
N:CNVR:12q24.11:chr12:109924000:109924999::	chr12:109,924,000-109,924,999 (100kb, 12q24.11)	CNVR	12	109924000	109924999	N:GEXP:DHX37:chr12:125431370:125473667:-:57647	DHX37	GEXP	12	125431370	125473667	15506371	0	6	0.35	188
N:CNVR:21q22.13:chr21:38622000:39644999::	chr21:38,622,000-39,644,999 (1bp, 21q22.13)	CNVR	21	38622000	39644999	N:GEXP:DHX37:chr12:125431370:125473667:-:57647	DHX37	GEXP	12	125431370	125473667	500000000	0	6	-0.35	188
N:CNVR:15q23:chr15:70406000:71167999::	chr15:70,406,000-71,167,999 (762Mb, 15q23)	CNVR	15	70406000	71167999	N:GEXP:DHX37:chr12:125431370:125473667:-:57647	DHX37	GEXP	12	125431370	125473667	500000000	0	6	-0.35	188
Table6.LUSC
id_a	pretty_label_a	datatype_a	chr_a	start_a	end_a	id_b	pretty_label_b	datatype_b	chr_b	start_b	end_b	link_distance	adj_logged_pvalue	logged_pvalue	correlation	num_nonna
N:GEXP:DDX54:chr12:113594978:113623284:-:79039	DDX54	GEXP	12	113594978	113623284	N:GEXP:DHX37:chr12:125431370:125473667:-:57647	DHX37	GEXP	12	125431370	125473667	11808086	31.1	39.1	0.701	259
N:GEXP:DHX37:chr12:125431370:125473667:-:57647	DHX37	GEXP	12	125431370	125473667	N:GEXP:SFSWAP:chr12:132195635:132284282:+:6433	SFSWAP	GEXP	12	132195635	132284282	6721968	26.9	35	0.672	259
N:GEXP:DHX37:chr12:125431370:125473667:-:57647	DHX37	GEXP	12	125431370	125473667	N:GEXP:GCN1L1:chr12:120565014:120632513:-:10985	GCN1L1	GEXP	12	120565014	120632513	4798857	26.4	34.5	0.668	259
N:GEXP:DHX37:chr12:125431370:125473667:-:57647	DHX37	GEXP	12	125431370	125473667	N:GEXP:PUS1:chr12:132413745:132428406:+:80324	PUS1	GEXP	12	132413745	132428406	6940078	23.7	31.8	0.648	259
N:GEXP:DHX37:chr12:125431370:125473667:-:57647	DHX37	GEXP	12	125431370	125473667	N:GEXP:FBRSL1:chr12:133067157:133161773:+:57666	FBRSL1	GEXP	12	133067157	133161773	7593490	23.8	31.8	0.648	259
N:GEXP:DHX37:chr12:125431370:125473667:-:57647	DHX37	GEXP	12	125431370	125473667	N:GEXP:EP400:chr12:132434465:132565011:+:57634	EP400	GEXP	12	132434465	132565011	6960798	23.3	31.3	0.644	259
N:GEXP:DHX37:chr12:125431370:125473667:-:57647	DHX37	GEXP	12	125431370	125473667	N:GEXP:POLE:chr12:133200348:133263945:-:5426	POLE	GEXP	12	133200348	133263945	7726681	22.9	31	0.641	259
N:GEXP:DDX51:chr12:132621140:132628880:-:317781	DDX51	GEXP	12	132621140	132628880	N:GEXP:DHX37:chr12:125431370:125473667:-:57647	DHX37	GEXP	12	125431370	125473667	7147473	21.2	29.3	0.627	259
N:GEXP:DHX37:chr12:125431370:125473667:-:57647	DHX37	GEXP	12	125431370	125473667	N:GEXP:NCOR2:chr12:124808957:125052010:-:9612	NCOR2	GEXP	12	124808957	125052010	379360	18.7	26.8	0.605	259
N:GEXP:DHX37:chr12:125431370:125473667:-:57647	DHX37	GEXP	12	125431370	125473667	N:GEXP:MYBBP1A:chr17:4442191:4458681:-:10514	MYBBP1A	GEXP	17	4442191	4458681	500000000	18.1	26.1	0.599	259
N:GEXP:DHX37:chr12:125431370:125473667:-:57647	DHX37	GEXP	12	125431370	125473667	N:GEXP:UBTF:chr17:42282401:42298994:-:7343	UBTF	GEXP	17	42282401	42298994	500000000	17.6	25.7	0.594	259
N:GEXP:DHX37:chr12:125431370:125473667:-:57647	DHX37	GEXP	12	125431370	125473667	N:GEXP:SART3:chr12:108915991:108955176:-:9733	SART3	GEXP	12	108915991	108955176	16476194	17.5	25.6	0.593	259
N:GEXP:DHX37:chr12:125431370:125473667:-:57647	DHX37	GEXP	12	125431370	125473667	N:GEXP:HCFC1:chrX:153213008:153236819:-:3054	HCFC1	GEXP	X	153213008	153236819	500000000	16.7	24.8	0.585	259
N:GEXP:DHX37:chr12:125431370:125473667:-:57647	DHX37	GEXP	12	125431370	125473667	N:GEXP:NOC4L:chr12:132628993:132636986:+:79050	NOC4L	GEXP	12	132628993	132636986	7155326	16.1	24.2	0.58	259
N:GEXP:DHX37:chr12:125431370:125473667:-:57647	DHX37	GEXP	12	125431370	125473667	N:GEXP:PFAS:chr17:8152596:8173809:+:5198	PFAS	GEXP	17	8152596	8173809	500000000	16	24.1	0.579	259
N:GEXP:DHX37:chr12:125431370:125473667:-:57647	DHX37	GEXP	12	125431370	125473667	N:GEXP:KDM2B:chr12:121866900:122018920:-:84678	KDM2B	GEXP	12	121866900	122018920	3412450	15.9	24	0.577	259
N:GEXP:CIT:chr12:120123595:120315095:-:11113	CIT	GEXP	12	120123595	120315095	N:GEXP:DHX37:chr12:125431370:125473667:-:57647	DHX37	GEXP	12	125431370	125473667	5116275	15.7	23.8	0.575	259
N:GEXP:DHX37:chr12:125431370:125473667:-:57647	DHX37	GEXP	12	125431370	125473667	N:GEXP:SAFB:chr19:5623046:5668489:+:6294	SAFB	GEXP	19	5623046	5668489	500000000	15.8	23.8	0.576	259
N:GEXP:DHX37:chr12:125431370:125473667:-:57647	DHX37	GEXP	12	125431370	125473667	N:GEXP:KIAA0664:chr17:2592680:2614927:-:23277	KIAA0664	GEXP	17	2592680	2614927	500000000	15.6	23.6	0.574	259
N:GEXP:DHX37:chr12:125431370:125473667:-:57647	DHX37	GEXP	12	125431370	125473667	N:GEXP:TMEM120B:chr12:122150658:122220907:+:144404	TMEM120B	GEXP	12	122150658	122220907	3210463	14.9	23	0.567	259
N:GEXP:DHX37:chr12:125431370:125473667:-:57647	DHX37	GEXP	12	125431370	125473667	N:GEXP:GOLGA3:chr12:133345495:133405426:-:2802	GOLGA3	GEXP	12	133345495	133405426	7871828	15	23	0.567	259
N:GEXP:DHX37:chr12:125431370:125473667:-:57647	DHX37	GEXP	12	125431370	125473667	N:GEXP:INTS1:chr7:1509913:1544018:-:26173	INTS1	GEXP	7	1509913	1544018	500000000	14.5	22.5	0.562	259
N:GEXP:DHX37:chr12:125431370:125473667:-:57647	DHX37	GEXP	12	125431370	125473667	N:GEXP:SAFB2:chr19:5587010:5622938:-:9667	SAFB2	GEXP	19	5587010	5622938	500000000	14.3	22.4	0.56	259
N:GEXP:DHX37:chr12:125431370:125473667:-:57647	DHX37	GEXP	12	125431370	125473667	N:GEXP:HDGFRP2:chr19:4472255:4502222:+:84717	HDGFRP2	GEXP	19	4472255	4502222	500000000	14.2	22.3	0.559	259
N:GEXP:DHX37:chr12:125431370:125473667:-:57647	DHX37	GEXP	12	125431370	125473667	N:GEXP:TCOF1:chr5:149737202:149779871:+:6949	TCOF1	GEXP	5	149737202	149779871	500000000	14	22.1	0.557	259
N:GEXP:DHX37:chr12:125431370:125473667:-:57647	DHX37	GEXP	12	125431370	125473667	N:GEXP:RBM10:chrX:47004617:47046214:+:8241	RBM10	GEXP	X	47004617	47046214	500000000	13.7	21.8	0.553	259
N:GEXP:DHX37:chr12:125431370:125473667:-:57647	DHX37	GEXP	12	125431370	125473667	N:GEXP:SCRIB:chr8:144873090:144897549:-:23513	SCRIB	GEXP	8	144873090	144897549	500000000	13.5	21.6	0.551	259
N:GEXP:CPSF1:chr8:145618446:145634733:-:29894	CPSF1	GEXP	8	145618446	145634733	N:GEXP:DHX37:chr12:125431370:125473667:-:57647	DHX37	GEXP	12	125431370	125473667	500000000	13.4	21.5	0.55	259
N:GEXP:C19ORF29:chr19:3610627:3626813:-:58509	C19ORF29	GEXP	19	3610627	3626813	N:GEXP:DHX37:chr12:125431370:125473667:-:57647	DHX37	GEXP	12	125431370	125473667	500000000	13.5	21.5	0.551	259
N:GEXP:DHX37:chr12:125431370:125473667:-:57647	DHX37	GEXP	12	125431370	125473667	N:GEXP:SMARCD1:chr12:50478983:50494494:+:6602	SMARCD1	GEXP	12	50478983	50494494	74936876	13.2	21.2	0.547	259
N:GEXP:AZI1:chr17:79163393:79196751:-:22994	AZI1	GEXP	17	79163393	79196751	N:GEXP:DHX37:chr12:125431370:125473667:-:57647	DHX37	GEXP	12	125431370	125473667	500000000	13.1	21.2	0.547	259
N:GEXP:DHX37:chr12:125431370:125473667:-:57647	DHX37	GEXP	12	125431370	125473667	N:GEXP:PELP1:chr17:4574679:4607632:-:27043	PELP1	GEXP	17	4574679	4607632	500000000	13	21.1	0.546	259
N:GEXP:DHX37:chr12:125431370:125473667:-:57647	DHX37	GEXP	12	125431370	125473667	N:GEXP:SRRT:chr7:100472701:100486285:+:51593	SRRT	GEXP	7	100472701	100486285	500000000	12.9	21	0.545	259
N:GEXP:DHX37:chr12:125431370:125473667:-:57647	DHX37	GEXP	12	125431370	125473667	N:GEXP:HNRNPM:chr19:8509803:8554002:+:4670	HNRNPM	GEXP	19	8509803	8554002	500000000	12.8	20.9	0.543	259
N:GEXP:C12ORF51:chr12:112597992:112819896:-:283450	C12ORF51	GEXP	12	112597992	112819896	N:GEXP:DHX37:chr12:125431370:125473667:-:57647	DHX37	GEXP	12	125431370	125473667	12611474	12.8	20.9	0.544	259
N:GEXP:DHX37:chr12:125431370:125473667:-:57647	DHX37	GEXP	12	125431370	125473667	N:GEXP:SETD1A:chr16:30968615:30995981:+:9739	SETD1A	GEXP	16	30968615	30995981	500000000	12.7	20.8	0.542	259
N:GEXP:DHX37:chr12:125431370:125473667:-:57647	DHX37	GEXP	12	125431370	125473667	N:GEXP:DOHH:chr19:3490819:3500938:-:83475	DOHH	GEXP	19	3490819	3500938	500000000	12.6	20.7	0.541	259
N:GEXP:DHX37:chr12:125431370:125473667:-:57647	DHX37	GEXP	12	125431370	125473667	N:GEXP:FASN:chr17:80036214:80056106:-:2194	FASN	GEXP	17	80036214	80056106	500000000	12.1	20.2	0.535	259
N:GEXP:BRPF1:chr3:9773434:9789699:+:7862	BRPF1	GEXP	3	9773434	9789699	N:GEXP:DHX37:chr12:125431370:125473667:-:57647	DHX37	GEXP	12	125431370	125473667	500000000	12	20	0.534	259
N:GEXP:DHX37:chr12:125431370:125473667:-:57647	DHX37	GEXP	12	125431370	125473667	N:GEXP:TNRC18:chr7:5346423:5465045:-:84629	TNRC18	GEXP	7	5346423	5465045	500000000	11.8	19.9	0.532	259
N:GEXP:DHX37:chr12:125431370:125473667:-:57647	DHX37	GEXP	12	125431370	125473667	N:GEXP:PTPN23:chr3:47422491:47454931:+:25930	PTPN23	GEXP	3	47422491	47454931	500000000	11.6	19.7	0.53	259
N:GEXP:DHX37:chr12:125431370:125473667:-:57647	DHX37	GEXP	12	125431370	125473667	N:GEXP:ZNF335:chr20:44577292:44600833:-:63925	ZNF335	GEXP	20	44577292	44600833	500000000	11.6	19.6	0.529	259
N:GEXP:DHX37:chr12:125431370:125473667:-:57647	DHX37	GEXP	12	125431370	125473667	N:GEXP:FUS:chr16:31191431:31206192:+:2521	FUS	GEXP	16	31191431	31206192	500000000	11.4	19.5	0.527	259
N:GEXP:DHX37:chr12:125431370:125473667:-:57647	DHX37	GEXP	12	125431370	125473667	N:GEXP:HIP1R:chr12:123319295:123347507:+:9026	HIP1R	GEXP	12	123319295	123347507	2083863	11.4	19.5	0.527	259
N:GEXP:ATAD3A:chr1:1447523:1470067:+:55210	ATAD3A	GEXP	1	1447523	1470067	N:GEXP:DHX37:chr12:125431370:125473667:-:57647	DHX37	GEXP	12	125431370	125473667	500000000	11.4	19.4	0.527	259
N:GEXP:DHX37:chr12:125431370:125473667:-:57647	DHX37	GEXP	12	125431370	125473667	N:GEXP:SETD1B:chr12:122242638:122270562:+:23067	SETD1B	GEXP	12	122242638	122270562	3160808	11.3	19.3	0.525	259
N:GEXP:DHX37:chr12:125431370:125473667:-:57647	DHX37	GEXP	12	125431370	125473667	N:GEXP:RRP12:chr10:99116458:99161127:-:23223	RRP12	GEXP	10	99116458	99161127	500000000	11.3	19.3	0.525	259
N:GEXP:DHX37:chr12:125431370:125473667:-:57647	DHX37	GEXP	12	125431370	125473667	N:GEXP:UTP20:chr12:101673905:101780397:+:27340	UTP20	GEXP	12	101673905	101780397	23650973	10.9	19	0.521	259
N:GEXP:DHX37:chr12:125431370:125473667:-:57647	DHX37	GEXP	12	125431370	125473667	N:GEXP:REXO1:chr19:1815245:1848452:-:57455	REXO1	GEXP	19	1815245	1848452	500000000	10.8	18.9	0.52	259
N:GEXP:DHX37:chr12:125431370:125473667:-:57647	DHX37	GEXP	12	125431370	125473667	N:GEXP:PDCD11:chr10:105156412:105206019:+:22984	PDCD11	GEXP	10	105156412	105206019	500000000	10.6	18.7	0.517	259
N:GEXP:DHX37:chr12:125431370:125473667:-:57647	DHX37	GEXP	12	125431370	125473667	N:GEXP:TCHP:chr12:110338079:110391074:+:84260	TCHP	GEXP	12	110338079	110391074	15040296	10.5	18.6	0.516	259
N:GEXP:ACAD10:chr12:112123857:112194911:+:80724	ACAD10	GEXP	12	112123857	112194911	N:GEXP:DHX37:chr12:125431370:125473667:-:57647	DHX37	GEXP	12	125431370	125473667	13236459	10.5	18.6	0.516	259
N:GEXP:DHX37:chr12:125431370:125473667:-:57647	DHX37	GEXP	12	125431370	125473667	N:GEXP:ZNF775:chr7:150076406:150095719:+:285971	ZNF775	GEXP	7	150076406	150095719	500000000	10.2	18.2	0.511	259
N:GEXP:DHX37:chr12:125431370:125473667:-:57647	DHX37	GEXP	12	125431370	125473667	N:GEXP:RRS1:chr8:67341263:67342968:+:23212	RRS1	GEXP	8	67341263	67342968	500000000	10.1	18.2	0.511	259
N:GEXP:DHX37:chr12:125431370:125473667:-:57647	DHX37	GEXP	12	125431370	125473667	N:GEXP:NEURL4:chr17:7218950:7232638:-:84461	NEURL4	GEXP	17	7218950	7232638	500000000	10	18.1	0.51	259
N:GEXP:DHX37:chr12:125431370:125473667:-:57647	DHX37	GEXP	12	125431370	125473667	N:GEXP:GNG10:chr9:114423850:114432526:+:2790	GNG10	GEXP	9	114423850	114432526	500000000	9.9	18	-0.508	259
N:GEXP:DHX37:chr12:125431370:125473667:-:57647	DHX37	GEXP	12	125431370	125473667	N:GEXP:ULK1:chr12:132379279:132407707:+:8408	ULK1	GEXP	12	132379279	132407707	6905612	10	18	0.509	259
N:GEXP:DHX37:chr12:125431370:125473667:-:57647	DHX37	GEXP	12	125431370	125473667	N:GEXP:USP19:chr3:49145479:49158371:-:10869	USP19	GEXP	3	49145479	49158371	500000000	9.8	17.8	0.506	259
N:GEXP:CEP250:chr20:34042996:34099803:+:11190	CEP250	GEXP	20	34042996	34099803	N:GEXP:DHX37:chr12:125431370:125473667:-:57647	DHX37	GEXP	12	125431370	125473667	500000000	9.7	17.8	0.506	259
N:GEXP:DHX37:chr12:125431370:125473667:-:57647	DHX37	GEXP	12	125431370	125473667	N:GEXP:ESPL1:chr12:53662083:53687427:+:9700	ESPL1	GEXP	12	53662083	53687427	71743943	9.8	17.8	0.506	259
N:GEXP:DHX37:chr12:125431370:125473667:-:57647	DHX37	GEXP	12	125431370	125473667	N:GEXP:ZC3H3:chr8:144519825:144623620:-:23144	ZC3H3	GEXP	8	144519825	144623620	500000000	9.7	17.7	0.505	259
N:GEXP:DHX30:chr3:47844399:47891686:+:22907	DHX30	GEXP	3	47844399	47891686	N:GEXP:DHX37:chr12:125431370:125473667:-:57647	DHX37	GEXP	12	125431370	125473667	500000000	9.6	17.7	0.505	259
N:GEXP:DHX37:chr12:125431370:125473667:-:57647	DHX37	GEXP	12	125431370	125473667	N:GEXP:SART1:chr11:65729160:65747607:+:9092	SART1	GEXP	11	65729160	65747607	500000000	9.5	17.6	0.503	259
N:GEXP:DHX37:chr12:125431370:125473667:-:57647	DHX37	GEXP	12	125431370	125473667	N:GEXP:MLXIP:chr12:122516652:122628967:+:22877	MLXIP	GEXP	12	122516652	122628967	2802403	9.5	17.6	0.503	259
N:GEXP:AKAP8L:chr19:15490859:15529833:-:26993	AKAP8L	GEXP	19	15490859	15529833	N:GEXP:DHX37:chr12:125431370:125473667:-:57647	DHX37	GEXP	12	125431370	125473667	500000000	9.5	17.6	0.503	259
N:GEXP:CAMKK2:chr12:121675495:121736111:-:10645	CAMKK2	GEXP	12	121675495	121736111	N:GEXP:DHX37:chr12:125431370:125473667:-:57647	DHX37	GEXP	12	125431370	125473667	3695259	9.5	17.6	0.503	259
N:GEXP:DHX37:chr12:125431370:125473667:-:57647	DHX37	GEXP	12	125431370	125473667	N:GEXP:TMED7:chr5:114948904:114961876:-:51014	TMED7	GEXP	5	114948904	114961876	500000000	9.4	17.5	-0.501	259
N:GEXP:DHX37:chr12:125431370:125473667:-:57647	DHX37	GEXP	12	125431370	125473667	N:GEXP:ILF3:chr19:10764937:10803095:+:3609	ILF3	GEXP	19	10764937	10803095	500000000	9.4	17.5	0.502	259
N:GEXP:CAD:chr2:27440258:27466654:+:790	CAD	GEXP	2	27440258	27466654	N:GEXP:DHX37:chr12:125431370:125473667:-:57647	DHX37	GEXP	12	125431370	125473667	500000000	9.3	17.4	0.5	259
N:GEXP:DHX37:chr12:125431370:125473667:-:57647	DHX37	GEXP	12	125431370	125473667	N:GEXP:RFX1:chr19:14072342:14117134:-:5989	RFX1	GEXP	19	14072342	14117134	500000000	9.2	17.3	0.499	259
N:GEXP:DHX37:chr12:125431370:125473667:-:57647	DHX37	GEXP	12	125431370	125473667	N:GEXP:PHRF1:chr11:576483:612222:+:57661	PHRF1	GEXP	11	576483	612222	500000000	9.2	17.3	0.499	259
N:GEXP:CHD4:chr12:6679248:6716551:-:1108	CHD4	GEXP	12	6679248	6716551	N:GEXP:DHX37:chr12:125431370:125473667:-:57647	DHX37	GEXP	12	125431370	125473667	118714819	9.3	17.3	0.5	259
N:GEXP:DHX37:chr12:125431370:125473667:-:57647	DHX37	GEXP	12	125431370	125473667	N:GEXP:YPEL5:chr2:30369750:30383399:+:51646	YPEL5	GEXP	2	30369750	30383399	500000000	9	17.1	-0.496	259
N:GEXP:CCNF:chr16:2479395:2508859:+:899	CCNF	GEXP	16	2479395	2508859	N:GEXP:DHX37:chr12:125431370:125473667:-:57647	DHX37	GEXP	12	125431370	125473667	500000000	8.8	16.9	0.494	259
N:CNVR:12q24.32:chr12:127635000:129229999::	chr12:127,635,000-129,229,999 (2bp, 12q24.32)	CNVR	12	127635000	129229999	N:GEXP:DHX37:chr12:125431370:125473667:-:57647	DHX37	GEXP	12	125431370	125473667	2161333	8.9	16.9	0.495	258
N:GEXP:DHX37:chr12:125431370:125473667:-:57647	DHX37	GEXP	12	125431370	125473667	N:GEXP:PRDM4:chr12:108126643:108155021:-:11108	PRDM4	GEXP	12	108126643	108155021	17276349	8.8	16.9	0.494	259
N:GEXP:DHX37:chr12:125431370:125473667:-:57647	DHX37	GEXP	12	125431370	125473667	N:GEXP:HIGD1A:chr3:42824400:42846027:-:25994	HIGD1A	GEXP	3	42824400	42846027	500000000	8.9	16.9	-0.494	259
N:GEXP:DHX37:chr12:125431370:125473667:-:57647	DHX37	GEXP	12	125431370	125473667	N:GEXP:TCF3:chr19:1609289:1652328:-:6929	TCF3	GEXP	19	1609289	1652328	500000000	8.8	16.8	0.493	259
N:GEXP:ATXN2L:chr16:28834414:28848558:+:11273	ATXN2L	GEXP	16	28834414	28848558	N:GEXP:DHX37:chr12:125431370:125473667:-:57647	DHX37	GEXP	12	125431370	125473667	500000000	8.7	16.8	0.492	259
N:GEXP:DHX37:chr12:125431370:125473667:-:57647	DHX37	GEXP	12	125431370	125473667	N:GEXP:SMARCC2:chr12:56555636:56583351:-:6601	SMARCC2	GEXP	12	56555636	56583351	68848019	8.7	16.8	0.492	259
N:GEXP:DHX37:chr12:125431370:125473667:-:57647	DHX37	GEXP	12	125431370	125473667	N:GEXP:MLL4:chr19:36208920:36229779:+:9757	MLL4	GEXP	19	36208920	36229779	500000000	8.6	16.7	0.49	259
N:GEXP:DAZAP1:chr19:1407584:1435682:+:26528	DAZAP1	GEXP	19	1407584	1435682	N:GEXP:DHX37:chr12:125431370:125473667:-:57647	DHX37	GEXP	12	125431370	125473667	500000000	8.6	16.7	0.491	259
N:GEXP:DHX37:chr12:125431370:125473667:-:57647	DHX37	GEXP	12	125431370	125473667	N:GEXP:LOC401010:chr2:132199734:132202467:-:401010	LOC401010	GEXP	2	132199734	132202467	500000000	8.6	16.7	0.491	259
N:GEXP:CHERP:chr19:16628700:16653263:-:10523	CHERP	GEXP	19	16628700	16653263	N:GEXP:DHX37:chr12:125431370:125473667:-:57647	DHX37	GEXP	12	125431370	125473667	500000000	8.5	16.6	0.49	259
N:GEXP:AARS2:chr6:44266463:44281063:-:57505	AARS2	GEXP	6	44266463	44281063	N:GEXP:DHX37:chr12:125431370:125473667:-:57647	DHX37	GEXP	12	125431370	125473667	500000000	8.5	16.6	0.489	259
N:GEXP:DHX37:chr12:125431370:125473667:-:57647	DHX37	GEXP	12	125431370	125473667	N:GEXP:ZNF777:chr7:149128454:149158053:-:27153	ZNF777	GEXP	7	149128454	149158053	500000000	8.5	16.6	0.49	259
N:GEXP:DHX37:chr12:125431370:125473667:-:57647	DHX37	GEXP	12	125431370	125473667	N:GEXP:SLC4A2:chr7:150755299:150773614:+:6522	SLC4A2	GEXP	7	150755299	150773614	500000000	8.5	16.6	0.489	259
N:GEXP:DHX37:chr12:125431370:125473667:-:57647	DHX37	GEXP	12	125431370	125473667	N:GEXP:KHSRP:chr19:6413119:6424822:-:8570	KHSRP	GEXP	19	6413119	6424822	500000000	8.3	16.4	0.486	259
N:GEXP:DHX37:chr12:125431370:125473667:-:57647	DHX37	GEXP	12	125431370	125473667	N:GEXP:PTBP1:chr19:797392:812327:+:5725	PTBP1	GEXP	19	797392	812327	500000000	8.3	16.4	0.486	259
N:CNVR:12q24.3:chr12:129233000:130002999::	chr12:129,233,000-130,002,999 (770Mb, 12q24.3)	CNVR	12	129233000	130002999	N:GEXP:DHX37:chr12:125431370:125473667:-:57647	DHX37	GEXP	12	125431370	125473667	3759333	8.2	16.3	0.486	258
N:GEXP:DHX37:chr12:125431370:125473667:-:57647	DHX37	GEXP	12	125431370	125473667	N:GEXP:ZNF142:chr2:219502640:219524261:-:7701	ZNF142	GEXP	2	219502640	219524261	500000000	8.2	16.3	0.485	259
N:GEXP:DHX37:chr12:125431370:125473667:-:57647	DHX37	GEXP	12	125431370	125473667	N:GEXP:SF1:chr11:64532076:64546316:-:7536	SF1	GEXP	11	64532076	64546316	500000000	8.1	16.2	0.484	259
N:CNVR:12q24.32:chr12:127005000:127124999::	chr12:127,005,000-127,124,999 (120Mb, 12q24.32)	CNVR	12	127005000	127124999	N:GEXP:DHX37:chr12:125431370:125473667:-:57647	DHX37	GEXP	12	125431370	125473667	1531333	8	16.1	0.483	258
N:GEXP:DHX37:chr12:125431370:125473667:-:57647	DHX37	GEXP	12	125431370	125473667	N:GEXP:GATAD2A:chr19:19496642:19619741:+:54815	GATAD2A	GEXP	19	19496642	19619741	500000000	8	16	0.482	259
N:GEXP:DHX37:chr12:125431370:125473667:-:57647	DHX37	GEXP	12	125431370	125473667	N:GEXP:PRRC2A:chr6:31588450:31605554:+:7916	PRRC2A	GEXP	6	31588450	31605554	500000000	7.9	16	0.481	259
N:GEXP:CNTROB:chr17:7835442:7853237:+:116840	CNTROB	GEXP	17	7835442	7853237	N:GEXP:DHX37:chr12:125431370:125473667:-:57647	DHX37	GEXP	12	125431370	125473667	500000000	7.8	15.9	0.48	259
N:GEXP:DHX37:chr12:125431370:125473667:-:57647	DHX37	GEXP	12	125431370	125473667	N:GEXP:SNAPC4:chr9:139270029:139292889:-:6621	SNAPC4	GEXP	9	139270029	139292889	500000000	7.8	15.9	0.48	259
N:GEXP:DHX37:chr12:125431370:125473667:-:57647	DHX37	GEXP	12	125431370	125473667	N:GEXP:DOT1L:chr19:2164148:2232577:+:84444	DOT1L	GEXP	19	2164148	2232577	500000000	7.8	15.8	0.479	259
N:CNVR:TMEM132D:chr12:130004000:130446999::	chr12:130,004,000-130,446,999 (443Mb, TMEM132D)	CNVR	12	130004000	130446999	N:GEXP:DHX37:chr12:125431370:125473667:-:57647	DHX37	GEXP	12	125431370	125473667	4530333	7.8	15.8	0.479	258
N:GEXP:DHX37:chr12:125431370:125473667:-:57647	DHX37	GEXP	12	125431370	125473667	N:GEXP:NUMA1:chr11:71713911:71791573:-:4926	NUMA1	GEXP	11	71713911	71791573	500000000	7.7	15.7	0.478	259
N:CNVR:12q24.32:chr12:127131000:127372999::	chr12:127,131,000-127,372,999 (242Mb, 12q24.32)	CNVR	12	127131000	127372999	N:GEXP:DHX37:chr12:125431370:125473667:-:57647	DHX37	GEXP	12	125431370	125473667	1657333	7.7	15.7	0.477	258
N:GEXP:ARPC5:chr1:183595332:183604985:-:10092	ARPC5	GEXP	1	183595332	183604985	N:GEXP:DHX37:chr12:125431370:125473667:-:57647	DHX37	GEXP	12	125431370	125473667	500000000	7.6	15.7	-0.477	259
N:GEXP:ACIN1:chr14:23527774:23564823:-:22985	ACIN1	GEXP	14	23527774	23564823	N:GEXP:DHX37:chr12:125431370:125473667:-:57647	DHX37	GEXP	12	125431370	125473667	500000000	7.6	15.7	0.477	259
N:GEXP:ATXN2:chr12:111890018:112037480:-:6311	ATXN2	GEXP	12	111890018	112037480	N:GEXP:DHX37:chr12:125431370:125473667:-:57647	DHX37	GEXP	12	125431370	125473667	13393890	7.6	15.7	0.477	259
N:GEXP:DHX37:chr12:125431370:125473667:-:57647	DHX37	GEXP	12	125431370	125473667	N:GEXP:EDC4:chr16:67906926:67920270:+:23644	EDC4	GEXP	16	67906926	67920270	500000000	7.6	15.7	0.477	259
N:CNVR:12q24.33:chr12:131899000:132092999::	chr12:131,899,000-132,092,999 (194Mb, 12q24.33)	CNVR	12	131899000	132092999	N:GEXP:DHX37:chr12:125431370:125473667:-:57647	DHX37	GEXP	12	125431370	125473667	6425333	7.7	15.7	0.478	258
N:GEXP:DHX37:chr12:125431370:125473667:-:57647	DHX37	GEXP	12	125431370	125473667	N:GEXP:RBM28:chr7:127950436:127983962:-:55131	RBM28	GEXP	7	127950436	127983962	500000000	7.6	15.7	0.477	259
N:CNVR:12q24.32:chr12:126000000:126798999::	chr12:126,000,000-126,798,999 (799Mb, 12q24.32)	CNVR	12	126000000	126798999	N:GEXP:DHX37:chr12:125431370:125473667:-:57647	DHX37	GEXP	12	125431370	125473667	526333	7.6	15.6	0.477	258
N:CNVR:12q24.33:chr12:132093000:132119999::	chr12:132,093,000-132,119,999 (27Mb, 12q24.33)	CNVR	12	132093000	132119999	N:GEXP:DHX37:chr12:125431370:125473667:-:57647	DHX37	GEXP	12	125431370	125473667	6619333	7.5	15.6	0.476	258
N:GEXP:DHX37:chr12:125431370:125473667:-:57647	DHX37	GEXP	12	125431370	125473667	N:GEXP:RPTOR:chr17:78518625:78940173:+:57521	RPTOR	GEXP	17	78518625	78940173	500000000	7.5	15.6	0.475	259
N:GEXP:ANKRD52:chr12:56631588:56652143:-:283373	ANKRD52	GEXP	12	56631588	56652143	N:GEXP:DHX37:chr12:125431370:125473667:-:57647	DHX37	GEXP	12	125431370	125473667	68779227	7.5	15.6	0.475	259
N:GEXP:DHX37:chr12:125431370:125473667:-:57647	DHX37	GEXP	12	125431370	125473667	N:GEXP:INCENP:chr11:61891445:61920635:+:3619	INCENP	GEXP	11	61891445	61920635	500000000	7.4	15.5	0.474	259
N:GEXP:DHX37:chr12:125431370:125473667:-:57647	DHX37	GEXP	12	125431370	125473667	N:GEXP:TONSL:chr8:145654163:145669812:-:4796	TONSL	GEXP	8	145654163	145669812	500000000	7.4	15.5	0.474	259
N:GEXP:DHX37:chr12:125431370:125473667:-:57647	DHX37	GEXP	12	125431370	125473667	N:GEXP:ZNF707:chr8:144766622:144794977:+:286075	ZNF707	GEXP	8	144766622	144794977	500000000	7.3	15.4	0.473	259
N:GEXP:DHX37:chr12:125431370:125473667:-:57647	DHX37	GEXP	12	125431370	125473667	N:GEXP:SMARCA4:chr19:11071598:11172958:+:6597	SMARCA4	GEXP	19	11071598	11172958	500000000	7.3	15.4	0.473	259
N:GEXP:DHX37:chr12:125431370:125473667:-:57647	DHX37	GEXP	12	125431370	125473667	N:GEXP:NKIRAS1:chr3:23933572:23988053:-:28512	NKIRAS1	GEXP	3	23933572	23988053	500000000	7.3	15.4	-0.472	259
N:CNVR:12q24.3:chr12:125486000:125998999::	chr12:125,486,000-125,998,999 (513Mb, 12q24.3)	CNVR	12	125486000	125998999	N:GEXP:DHX37:chr12:125431370:125473667:-:57647	DHX37	GEXP	12	125431370	125473667	12333	7.4	15.4	0.474	258
N:GEXP:DHX37:chr12:125431370:125473667:-:57647	DHX37	GEXP	12	125431370	125473667	N:GEXP:RNF13:chr3:149530475:149679925:+:11342	RNF13	GEXP	3	149530475	149679925	500000000	7.3	15.4	-0.473	259
N:GEXP:DHX37:chr12:125431370:125473667:-:57647	DHX37	GEXP	12	125431370	125473667	N:GEXP:ZNF598:chr16:2047768:2059763:-:90850	ZNF598	GEXP	16	2047768	2059763	500000000	7.2	15.3	0.471	259
N:GEXP:BRAT1:chr7:2577444:2595392:-:221927	BRAT1	GEXP	7	2577444	2595392	N:GEXP:DHX37:chr12:125431370:125473667:-:57647	DHX37	GEXP	12	125431370	125473667	500000000	7.2	15.3	0.471	259
N:CNVR:12q24.33:chr12:130451000:131793999::	chr12:130,451,000-131,793,999 (1bp, 12q24.33)	CNVR	12	130451000	131793999	N:GEXP:DHX37:chr12:125431370:125473667:-:57647	DHX37	GEXP	12	125431370	125473667	4977333	7.2	15.3	0.471	258
N:GEXP:DHX37:chr12:125431370:125473667:-:57647	DHX37	GEXP	12	125431370	125473667	N:GEXP:KRBA1:chr7:149412102:149431664:+:84626	KRBA1	GEXP	7	149412102	149431664	500000000	7.2	15.3	0.471	259
N:GEXP:DHX37:chr12:125431370:125473667:-:57647	DHX37	GEXP	12	125431370	125473667	N:GEXP:NINL:chr20:25433338:25566153:-:22981	NINL	GEXP	20	25433338	25566153	500000000	7.1	15.2	0.47	259
N:GEXP:DHX37:chr12:125431370:125473667:-:57647	DHX37	GEXP	12	125431370	125473667	N:GEXP:ZC3H4:chr19:47567447:47617009:-:23211	ZC3H4	GEXP	19	47567447	47617009	500000000	7.1	15.2	0.47	259
N:GEXP:DHX37:chr12:125431370:125473667:-:57647	DHX37	GEXP	12	125431370	125473667	N:GEXP:WDR81:chr17:1619817:1641893:+:124997	WDR81	GEXP	17	1619817	1641893	500000000	7.1	15.2	0.469	259
N:GEXP:DHX37:chr12:125431370:125473667:-:57647	DHX37	GEXP	12	125431370	125473667	N:GEXP:RAB35:chr12:120532899:120554643:-:11021	RAB35	GEXP	12	120532899	120554643	4876727	7.1	15.2	0.47	259
N:CNVR:LOC100128554:chr12:126800000:126993999::	chr12:126,800,000-126,993,999 (194Mb, LOC100128554)	CNVR	12	126800000	126993999	N:GEXP:DHX37:chr12:125431370:125473667:-:57647	DHX37	GEXP	12	125431370	125473667	1326333	7.2	15.2	0.47	258
N:CNVR:BC032874:chr12:127374000:127633999::	chr12:127,374,000-127,633,999 (260Mb, BC032874)	CNVR	12	127374000	127633999	N:GEXP:DHX37:chr12:125431370:125473667:-:57647	DHX37	GEXP	12	125431370	125473667	1900333	7.2	15.2	0.471	258
N:GEXP:DHX37:chr12:125431370:125473667:-:57647	DHX37	GEXP	12	125431370	125473667	N:GEXP:UBE2Q2:chr15:76135622:76193388:+:92912	UBE2Q2	GEXP	15	76135622	76193388	500000000	7	15.1	-0.468	259
N:GEXP:DHX37:chr12:125431370:125473667:-:57647	DHX37	GEXP	12	125431370	125473667	N:GEXP:RNF40:chr16:30772933:30787628:+:9810	RNF40	GEXP	16	30772933	30787628	500000000	7	15.1	0.468	259
N:GEXP:DHX37:chr12:125431370:125473667:-:57647	DHX37	GEXP	12	125431370	125473667	N:GEXP:RBM14:chr11:66384053:66435858:+:10432	RBM14	GEXP	11	66384053	66435858	500000000	6.9	15	0.467	259
N:GEXP:DHX37:chr12:125431370:125473667:-:57647	DHX37	GEXP	12	125431370	125473667	N:GEXP:MCEE:chr2:71336806:71357394:-:84693	MCEE	GEXP	2	71336806	71357394	500000000	6.9	15	-0.467	259
N:GEXP:DHX37:chr12:125431370:125473667:-:57647	DHX37	GEXP	12	125431370	125473667	N:GEXP:MAP1S:chr19:17830303:17845324:+:55201	MAP1S	GEXP	19	17830303	17845324	500000000	7	15	0.467	259
N:GEXP:BRAP:chr12:112079950:112123790:-:8315	BRAP	GEXP	12	112079950	112123790	N:GEXP:DHX37:chr12:125431370:125473667:-:57647	DHX37	GEXP	12	125431370	125473667	13307580	6.9	15	0.466	259
N:GEXP:DHX37:chr12:125431370:125473667:-:57647	DHX37	GEXP	12	125431370	125473667	N:GEXP:NOC2L:chr1:879583:894679:-:26155	NOC2L	GEXP	1	879583	894679	500000000	7	15	0.468	259
N:GEXP:DHX37:chr12:125431370:125473667:-:57647	DHX37	GEXP	12	125431370	125473667	N:GEXP:SYMPK:chr19:46318700:46366548:-:8189	SYMPK	GEXP	19	46318700	46366548	500000000	6.9	15	0.467	259
N:GEXP:DHX37:chr12:125431370:125473667:-:57647	DHX37	GEXP	12	125431370	125473667	N:GEXP:SELT:chr3:150321066:150348234:+:51714	SELT	GEXP	3	150321066	150348234	500000000	6.9	14.9	-0.466	259
N:GEXP:DHX37:chr12:125431370:125473667:-:57647	DHX37	GEXP	12	125431370	125473667	N:GEXP:RBM15B:chr3:51428699:51435336:+:29890	RBM15B	GEXP	3	51428699	51435336	500000000	6.9	14.9	0.466	259
N:CNVR:12q24.32:chr12:129230000:129232999::	chr12:129,230,000-129,232,999 (3Mb, 12q24.32)	CNVR	12	129230000	129232999	N:GEXP:DHX37:chr12:125431370:125473667:-:57647	DHX37	GEXP	12	125431370	125473667	3756333	6.7	14.7	0.464	258
N:CNVR:12q24.32:chr12:126994000:126994999::	chr12:126,994,000-126,994,999 (100kb, 12q24.32)	CNVR	12	126994000	126994999	N:GEXP:DHX37:chr12:125431370:125473667:-:57647	DHX37	GEXP	12	125431370	125473667	1520333	6.6	14.6	0.461	258
N:CNVR:LOC338797:chr12:131826000:131896999::	chr12:131,826,000-131,896,999 (71Mb, LOC338797)	CNVR	12	131826000	131896999	N:GEXP:DHX37:chr12:125431370:125473667:-:57647	DHX37	GEXP	12	125431370	125473667	6352333	6.6	14.6	0.461	258
N:CNVR:12q24.33:chr12:132143000:133007999::	chr12:132,143,000-133,007,999 (865Mb, 12q24.33)	CNVR	12	132143000	133007999	N:GEXP:DHX37:chr12:125431370:125473667:-:57647	DHX37	GEXP	12	125431370	125473667	6669333	6.6	14.6	0.462	258
N:CNVR:12q24.32:chr12:127373000:127373999::	chr12:127,373,000-127,373,999 (100kb, 12q24.32)	CNVR	12	127373000	127373999	N:GEXP:DHX37:chr12:125431370:125473667:-:57647	DHX37	GEXP	12	125431370	125473667	1899333	6.3	14.3	0.457	258
N:CNVR:12q24.31:chr12:122098000:125485999::	chr12:122,098,000-125,485,999 (3bp, 12q24.31)	CNVR	12	122098000	125485999	N:GEXP:DHX37:chr12:125431370:125473667:-:57647	DHX37	GEXP	12	125431370	125473667	0	6.3	14.3	0.457	258
N:CNVR:12q24.32:chr12:126995000:127004999::	chr12:126,995,000-127,004,999 (10Mb, 12q24.32)	CNVR	12	126995000	127004999	N:GEXP:DHX37:chr12:125431370:125473667:-:57647	DHX37	GEXP	12	125431370	125473667	1521333	6.2	14.2	0.456	258
N:CNVR:12q24.33:chr12:131794000:131825999::	chr12:131,794,000-131,825,999 (32Mb, 12q24.33)	CNVR	12	131794000	131825999	N:GEXP:DHX37:chr12:125431370:125473667:-:57647	DHX37	GEXP	12	125431370	125473667	6320333	6.1	14.1	0.454	258
N:CNVR:TMEM132B:chr12:125999000:125999999::	chr12:125,999,000-125,999,999 (100kb, TMEM132B)	CNVR	12	125999000	125999999	N:GEXP:DHX37:chr12:125431370:125473667:-:57647	DHX37	GEXP	12	125431370	125473667	525333	6	14	0.453	258
N:CNVR:12q24.33:chr12:133008000:133224999::	chr12:133,008,000-133,224,999 (217Mb, 12q24.33)	CNVR	12	133008000	133224999	N:GEXP:DHX37:chr12:125431370:125473667:-:57647	DHX37	GEXP	12	125431370	125473667	7534333	6	14	0.452	258
N:CNVR:12q24.23:chr12:119780000:119987999::	chr12:119,780,000-119,987,999 (208Mb, 12q24.23)	CNVR	12	119780000	119987999	N:GEXP:DHX37:chr12:125431370:125473667:-:57647	DHX37	GEXP	12	125431370	125473667	5443371	6	14	0.453	258
N:CNVR:12q24.32:chr12:128191796:128727780::Gistic_ROI_r_del	12q24.32 Deletion (Gistic, continuous)	CNVR	12	128191796	128727780	N:GEXP:DHX37:chr12:125431370:125473667:-:57647	DHX37	GEXP	12	125431370	125473667	2718129	6	14	0.454	257
N:CNVR:12q24:chr12:119991000:122097999::	chr12:119,991,000-122,097,999 (2bp, 12q24)	CNVR	12	119991000	122097999	N:GEXP:DHX37:chr12:125431370:125473667:-:57647	DHX37	GEXP	12	125431370	125473667	3333371	6	14	0.453	258
N:CNVR:CCDC60:chr12:119778000:119779999::	chr12:119,778,000-119,779,999 (2Mb, CCDC60)	CNVR	12	119778000	119779999	N:GEXP:DHX37:chr12:125431370:125473667:-:57647	DHX37	GEXP	12	125431370	125473667	5651371	5.8	13.9	0.45	258
N:CNVR:12q24.33:chr12:130447000:130450999::	chr12:130,447,000-130,450,999 (4Mb, 12q24.33)	CNVR	12	130447000	130450999	N:GEXP:DHX37:chr12:125431370:125473667:-:57647	DHX37	GEXP	12	125431370	125473667	4973333	5.9	13.9	0.451	258
N:CNVR:12q24.32:chr12:127634000:127634999::	chr12:127,634,000-127,634,999 (100kb, 12q24.32)	CNVR	12	127634000	127634999	N:GEXP:DHX37:chr12:125431370:125473667:-:57647	DHX37	GEXP	12	125431370	125473667	2160333	5.4	13.4	0.443	258
N:CNVR:POLE:chr12:133225000:133226999::	chr12:133,225,000-133,226,999 (2Mb, POLE)	CNVR	12	133225000	133226999	N:GEXP:DHX37:chr12:125431370:125473667:-:57647	DHX37	GEXP	12	125431370	125473667	7751333	5.2	13.3	0.441	258
N:CNVR:12q24.32:chr12:126799000:126799999::	chr12:126,799,000-126,799,999 (100kb, 12q24.32)	CNVR	12	126799000	126799999	N:GEXP:DHX37:chr12:125431370:125473667:-:57647	DHX37	GEXP	12	125431370	125473667	1325333	5.3	13.3	0.442	258
N:CNVR:12q24.33:chr12:131897000:131898999::	chr12:131,897,000-131,898,999 (2Mb, 12q24.33)	CNVR	12	131897000	131898999	N:GEXP:DHX37:chr12:125431370:125473667:-:57647	DHX37	GEXP	12	125431370	125473667	6423333	4.9	13	0.436	258
N:CNVR:12q24.32:chr12:127125000:127130999::	chr12:127,125,000-127,130,999 (6Mb, 12q24.32)	CNVR	12	127125000	127130999	N:GEXP:DHX37:chr12:125431370:125473667:-:57647	DHX37	GEXP	12	125431370	125473667	1651333	5	13	0.436	258
N:CNVR:12q24:chr12:112173000:119777999::	chr12:112,173,000-119,777,999 (8bp, 12q24)	CNVR	12	112173000	119777999	N:GEXP:DHX37:chr12:125431370:125473667:-:57647	DHX37	GEXP	12	125431370	125473667	5653371	4.9	12.9	0.434	258
N:CNVR:TMEM132D:chr12:130003000:130003999::	chr12:130,003,000-130,003,999 (100kb, TMEM132D)	CNVR	12	130003000	130003999	N:GEXP:DHX37:chr12:125431370:125473667:-:57647	DHX37	GEXP	12	125431370	125473667	4529333	4.4	12.4	0.426	258
N:CNVR:12q24.33:chr12:133227000:133778000::	chr12:133,227,000-133,778,000 (551Mb, 12q24.33)	CNVR	12	133227000	133778000	N:GEXP:DHX37:chr12:125431370:125473667:-:57647	DHX37	GEXP	12	125431370	125473667	7753333	4.2	12.2	0.423	258
N:CNVR:12q24.33:chr12:132142000:132142999::	chr12:132,142,000-132,142,999 (100kb, 12q24.33)	CNVR	12	132142000	132142999	N:GEXP:DHX37:chr12:125431370:125473667:-:57647	DHX37	GEXP	12	125431370	125473667	6668333	3.3	11.3	0.407	258
N:CNVR:12q24.33:chr12:132134000:132141999::	chr12:132,134,000-132,141,999 (8Mb, 12q24.33)	CNVR	12	132134000	132141999	N:GEXP:DHX37:chr12:125431370:125473667:-:57647	DHX37	GEXP	12	125431370	125473667	6660333	2.7	10.7	0.44	205
N:CNVR:12q24.33:chr12:132120000:132120999::	chr12:132,120,000-132,120,999 (100kb, 12q24.33)	CNVR	12	132120000	132120999	N:GEXP:DHX37:chr12:125431370:125473667:-:57647	DHX37	GEXP	12	125431370	125473667	6646333	2.7	10.7	0.397	258
N:CNVR:12q24.12:chr12:112123000:112123999::	chr12:112,123,000-112,123,999 (100kb, 12q24.12)	CNVR	12	112123000	112123999	N:GEXP:DHX37:chr12:125431370:125473667:-:57647	DHX37	GEXP	12	125431370	125473667	13307371	2.7	10.7	0.396	258
N:CNVR:ACAD10:chr12:112124000:112172999::	chr12:112,124,000-112,172,999 (49Mb, ACAD10)	CNVR	12	112124000	112172999	N:GEXP:DHX37:chr12:125431370:125473667:-:57647	DHX37	GEXP	12	125431370	125473667	13258371	2.3	10.3	0.388	258
N:CNVR:12q24.33:chr12:132121000:132131999::	chr12:132,121,000-132,131,999 (11Mb, 12q24.33)	CNVR	12	132121000	132131999	N:GEXP:DHX37:chr12:125431370:125473667:-:57647	DHX37	GEXP	12	125431370	125473667	6647333	1.9	9.9	0.423	206
N:CNVR:12q24.11:chr12:109858000:110137999::	chr12:109,858,000-110,137,999 (280Mb, 12q24.11)	CNVR	12	109858000	110137999	N:GEXP:DHX37:chr12:125431370:125473667:-:57647	DHX37	GEXP	12	125431370	125473667	15293371	1.9	9.9	0.38	258
N:CNVR:12q24.1:chr12:110157000:112122999::	chr12:110,157,000-112,122,999 (2bp, 12q24.1)	CNVR	12	110157000	112122999	N:GEXP:DHX37:chr12:125431370:125473667:-:57647	DHX37	GEXP	12	125431370	125473667	13308371	1.9	9.9	0.381	258
N:CNVR:MYO1H:chr12:109855000:109857999::	chr12:109,855,000-109,857,999 (3Mb, MYO1H)	CNVR	12	109855000	109857999	N:GEXP:DHX37:chr12:125431370:125473667:-:57647	DHX37	GEXP	12	125431370	125473667	15573371	1.3	9.3	0.369	258
N:CNVR:12q23.3:chr12:106781000:109854999::	chr12:106,781,000-109,854,999 (3bp, 12q23.3)	CNVR	12	106781000	109854999	N:GEXP:DHX37:chr12:125431370:125473667:-:57647	DHX37	GEXP	12	125431370	125473667	15576371	1.3	9.3	0.37	258
N:CNVR:AF086288:chr12:119988000:119990999::	chr12:119,988,000-119,990,999 (3Mb, AF086288)	CNVR	12	119988000	119990999	N:GEXP:DHX37:chr12:125431370:125473667:-:57647	DHX37	GEXP	12	125431370	125473667	5440371	1.1	9.1	0.364	258
N:CNVR:RMST:chr12:97878000:97884999::	chr12:97,878,000-97,884,999 (7Mb, RMST)	CNVR	12	97878000	97884999	N:GEXP:DHX37:chr12:125431370:125473667:-:57647	DHX37	GEXP	12	125431370	125473667	27546371	0.8	8.8	0.358	258
N:CNVR:12q23.3:chr12:104698000:106780999::	chr12:104,698,000-106,780,999 (2bp, 12q23.3)	CNVR	12	104698000	106780999	N:GEXP:DHX37:chr12:125431370:125473667:-:57647	DHX37	GEXP	12	125431370	125473667	18650371	0.8	8.8	0.358	258
N:CNVR:FAM222A:chr12:110138000:110156999::	chr12:110,138,000-110,156,999 (19Mb, FAM222A)	CNVR	12	110138000	110156999	N:GEXP:DHX37:chr12:125431370:125473667:-:57647	DHX37	GEXP	12	125431370	125473667	15274371	0.7	8.7	0.356	258
N:CNVR:12q23.1:chr12:97885000:98955999::	chr12:97,885,000-98,955,999 (1bp, 12q23.1)	CNVR	12	97885000	98955999	N:GEXP:DHX37:chr12:125431370:125473667:-:57647	DHX37	GEXP	12	125431370	125473667	26475371	0.5	8.5	0.352	258
N:CNVR:12q21.33:chr12:90494000:90588999::	chr12:90,494,000-90,588,999 (95Mb, 12q21.33)	CNVR	12	90494000	90588999	N:GEXP:DHX37:chr12:125431370:125473667:-:57647	DHX37	GEXP	12	125431370	125473667	34842371	0	8	0.34	258
N:CNVR:12q23:chr12:99804000:104696999::	chr12:99,804,000-104,696,999 (5bp, 12q23)	CNVR	12	99804000	104696999	N:GEXP:DHX37:chr12:125431370:125473667:-:57647	DHX37	GEXP	12	125431370	125473667	20734371	0	7.8	0.336	258
N:CNVR:12q22:chr12:91721000:97874999::	chr12:91,721,000-97,874,999 (6bp, 12q22)	CNVR	12	91721000	97874999	N:GEXP:DHX37:chr12:125431370:125473667:-:57647	DHX37	GEXP	12	125431370	125473667	27556371	0	7.7	0.333	258
N:GEXP:DHX37:chr12:125431370:125473667:-:57647	DHX37	GEXP	12	125431370	125473667	N:MIRN:HSA-MIR-92A-2:chrX:133303568:133303642:+:	HSA-MIR-92A-2	MIRN	X	133303568	133303642	500000000	0.7	7.6	0.347	235
N:CNVR:12q21.3:chr12:87764000:90482999::	chr12:87,764,000-90,482,999 (3bp, 12q21.3)	CNVR	12	87764000	90482999	N:GEXP:DHX37:chr12:125431370:125473667:-:57647	DHX37	GEXP	12	125431370	125473667	34948371	0	7.6	0.331	258
N:CNVR:12q23.1:chr12:98958000:99790999::	chr12:98,958,000-99,790,999 (833Mb, 12q23.1)	CNVR	12	98958000	99790999	N:GEXP:DHX37:chr12:125431370:125473667:-:57647	DHX37	GEXP	12	125431370	125473667	25640371	0	7.6	0.332	258
N:CNVR:12q23.1:chr12:98956000:98957999::	chr12:98,956,000-98,957,999 (2Mb, 12q23.1)	CNVR	12	98956000	98957999	N:GEXP:DHX37:chr12:125431370:125473667:-:57647	DHX37	GEXP	12	125431370	125473667	26473371	0	7.6	0.331	258
N:CNVR:12q21.33:chr12:90589000:91720999::	chr12:90,589,000-91,720,999 (1bp, 12q21.33)	CNVR	12	90589000	91720999	N:GEXP:DHX37:chr12:125431370:125473667:-:57647	DHX37	GEXP	12	125431370	125473667	33710371	0	7.4	0.328	258
N:CNVR:12q21.32:chr12:87763000:87763999::	chr12:87,763,000-87,763,999 (100kb, 12q21.32)	CNVR	12	87763000	87763999	N:GEXP:DHX37:chr12:125431370:125473667:-:57647	DHX37	GEXP	12	125431370	125473667	37667371	0	7.4	0.326	258
N:CNVR:ANKS1B:chr12:99803000:99803999::	chr12:99,803,000-99,803,999 (100kb, ANKS1B)	CNVR	12	99803000	99803999	N:GEXP:DHX37:chr12:125431370:125473667:-:57647	DHX37	GEXP	12	125431370	125473667	25627371	0	7.1	0.32	258
N:CNVR:RMST:chr12:97875000:97876999::	chr12:97,875,000-97,876,999 (2Mb, RMST)	CNVR	12	97875000	97876999	N:GEXP:DHX37:chr12:125431370:125473667:-:57647	DHX37	GEXP	12	125431370	125473667	27554371	0	7	0.316	258
N:CNVR:12q21.33:chr12:90493000:90493999::	chr12:90,493,000-90,493,999 (100kb, 12q21.33)	CNVR	12	90493000	90493999	N:GEXP:DHX37:chr12:125431370:125473667:-:57647	DHX37	GEXP	12	125431370	125473667	34937371	0	6.9	0.314	258
N:CNVR:RMST:chr12:97877000:97877999::	chr12:97,877,000-97,877,999 (100kb, RMST)	CNVR	12	97877000	97877999	N:GEXP:DHX37:chr12:125431370:125473667:-:57647	DHX37	GEXP	12	125431370	125473667	27553371	0	6.8	0.313	258
N:CNVR:MGAT4C:chr12:86433000:86880999::	chr12:86,433,000-86,880,999 (448Mb, MGAT4C)	CNVR	12	86433000	86880999	N:GEXP:DHX37:chr12:125431370:125473667:-:57647	DHX37	GEXP	12	125431370	125473667	38550371	0	6.7	0.31	258
N:CNVR:MGAT4C:chr12:86972000:87762999::	chr12:86,972,000-87,762,999 (791Mb, MGAT4C)	CNVR	12	86972000	87762999	N:GEXP:DHX37:chr12:125431370:125473667:-:57647	DHX37	GEXP	12	125431370	125473667	37668371	0	6.7	0.309	258
N:GEXP:DHX37:chr12:125431370:125473667:-:57647	DHX37	GEXP	12	125431370	125473667	N:MIRN:HSA-MIR-106B:chr7:99691616:99691697:+:	HSA-MIR-106B	MIRN	7	99691616	99691697	500000000	0	6	0.304	235
N:GEXP:DHX37:chr12:125431370:125473667:-:57647	DHX37	GEXP	12	125431370	125473667	N:MIRN:HSA-MIR-152:chr17:46114527:46114613:+:	HSA-MIR-152	MIRN	17	46114527	46114613	500000000	0	6	-0.303	235
C:CLIN:batch_number:::::	batch_number	CLIN				N:GEXP:DHX37:chr12:125431370:125473667:-:57647	DHX37	GEXP	12	125431370	125473667	500000000	0.2	6		258
Table7.LUAD
id_a	pretty_label_a	datatype_a	chr_a	start_a	end_a	id_b	pretty_label_b	datatype_b	chr_b	start_b	end_b	link_distance	adj_logged_pvalue	logged_pvalue	correlation	num_nonna
N:GEXP:DHX37:chr12:125431370:125473667:-:57647	DHX37	GEXP	12	125431370	125473667	N:GEXP:GCN1L1:chr12:120565014:120632513:-:10985	GCN1L1	GEXP	12	120565014	120632513	4798857	56.4	64.4	0.75	353
N:GEXP:DDX54:chr12:113594978:113623284:-:79039	DDX54	GEXP	12	113594978	113623284	N:GEXP:DHX37:chr12:125431370:125473667:-:57647	DHX37	GEXP	12	125431370	125473667	11808086	52.8	60.9	0.736	353
N:GEXP:DHX37:chr12:125431370:125473667:-:57647	DHX37	GEXP	12	125431370	125473667	N:GEXP:POLE:chr12:133200348:133263945:-:5426	POLE	GEXP	12	133200348	133263945	7726681	47	55.1	0.71	353
N:GEXP:DHX37:chr12:125431370:125473667:-:57647	DHX37	GEXP	12	125431370	125473667	N:GEXP:INCENP:chr11:61891445:61920635:+:3619	INCENP	GEXP	11	61891445	61920635	500000000	46.2	54.3	0.707	353
N:GEXP:DHX37:chr12:125431370:125473667:-:57647	DHX37	GEXP	12	125431370	125473667	N:GEXP:ESPL1:chr12:53662083:53687427:+:9700	ESPL1	GEXP	12	53662083	53687427	71743943	44.3	52.4	0.698	353
N:GEXP:DHX37:chr12:125431370:125473667:-:57647	DHX37	GEXP	12	125431370	125473667	N:GEXP:KIF18B:chr17:43002082:43025082:-:146909	KIF18B	GEXP	17	43002082	43025082	500000000	41.4	49.5	0.684	353
N:GEXP:DHX37:chr12:125431370:125473667:-:57647	DHX37	GEXP	12	125431370	125473667	N:GEXP:PUS1:chr12:132413745:132428406:+:80324	PUS1	GEXP	12	132413745	132428406	6940078	39.9	48	0.676	353
N:GEXP:DHX37:chr12:125431370:125473667:-:57647	DHX37	GEXP	12	125431370	125473667	N:GEXP:RBM19:chr12:114254543:114404176:-:9904	RBM19	GEXP	12	114254543	114404176	11027194	39.3	47.4	0.672	353
N:GEXP:DHX37:chr12:125431370:125473667:-:57647	DHX37	GEXP	12	125431370	125473667	N:GEXP:LMNB2:chr19:2428164:2456958:-:84823	LMNB2	GEXP	19	2428164	2456958	500000000	38.8	46.9	0.67	353
N:GEXP:DHX37:chr12:125431370:125473667:-:57647	DHX37	GEXP	12	125431370	125473667	N:GEXP:FOXM1:chr12:2966847:2986321:-:2305	FOXM1	GEXP	12	2966847	2986321	122445049	36.8	44.8	0.659	353
N:GEXP:DBF4B:chr17:42785976:42829636:+:80174	DBF4B	GEXP	17	42785976	42829636	N:GEXP:DHX37:chr12:125431370:125473667:-:57647	DHX37	GEXP	12	125431370	125473667	500000000	36.5	44.6	0.657	353
N:GEXP:DHX37:chr12:125431370:125473667:-:57647	DHX37	GEXP	12	125431370	125473667	N:GEXP:SART3:chr12:108915991:108955176:-:9733	SART3	GEXP	12	108915991	108955176	16476194	36.5	44.6	0.657	353
N:GEXP:CAD:chr2:27440258:27466654:+:790	CAD	GEXP	2	27440258	27466654	N:GEXP:DHX37:chr12:125431370:125473667:-:57647	DHX37	GEXP	12	125431370	125473667	500000000	35.8	43.9	0.653	353
N:GEXP:C15ORF42:chr15:90118818:90171253:+:90381	C15ORF42	GEXP	15	90118818	90171253	N:GEXP:DHX37:chr12:125431370:125473667:-:57647	DHX37	GEXP	12	125431370	125473667	500000000	35.3	43.3	0.65	353
N:GEXP:DHX37:chr12:125431370:125473667:-:57647	DHX37	GEXP	12	125431370	125473667	N:GEXP:TIMELESS:chr12:56810157:56843200:-:8914	TIMELESS	GEXP	12	56810157	56843200	68588170	35.2	43.2	0.649	353
N:GEXP:DHX37:chr12:125431370:125473667:-:57647	DHX37	GEXP	12	125431370	125473667	N:GEXP:SPAG5:chr17:26904583:26941211:-:10615	SPAG5	GEXP	17	26904583	26941211	500000000	34.4	42.5	0.645	353
N:GEXP:DHX37:chr12:125431370:125473667:-:57647	DHX37	GEXP	12	125431370	125473667	N:GEXP:NCAPD2:chr12:6603298:6641132:+:9918	NCAPD2	GEXP	12	6603298	6641132	118790238	34.1	42.1	0.643	353
N:GEXP:CHAF1A:chr19:4402660:4443394:+:10036	CHAF1A	GEXP	19	4402660	4443394	N:GEXP:DHX37:chr12:125431370:125473667:-:57647	DHX37	GEXP	12	125431370	125473667	500000000	32.4	40.5	0.633	353
N:GEXP:CLSPN:chr1:36197713:36235551:-:63967	CLSPN	GEXP	1	36197713	36235551	N:GEXP:DHX37:chr12:125431370:125473667:-:57647	DHX37	GEXP	12	125431370	125473667	500000000	32.2	40.2	0.631	353
N:GEXP:DHX37:chr12:125431370:125473667:-:57647	DHX37	GEXP	12	125431370	125473667	N:GEXP:TONSL:chr8:145654163:145669812:-:4796	TONSL	GEXP	8	145654163	145669812	500000000	31.5	39.6	0.627	353
N:GEXP:DHX37:chr12:125431370:125473667:-:57647	DHX37	GEXP	12	125431370	125473667	N:GEXP:NAA25:chr12:112464493:112546635:-:80018	NAA25	GEXP	12	112464493	112546635	12884735	30.9	39	0.623	353
N:GEXP:DHX37:chr12:125431370:125473667:-:57647	DHX37	GEXP	12	125431370	125473667	N:GEXP:PGAM5:chr12:133264635:133299323:+:192111	PGAM5	GEXP	12	133264635	133299323	7790968	30.9	39	0.623	353
N:GEXP:DHX37:chr12:125431370:125473667:-:57647	DHX37	GEXP	12	125431370	125473667	N:GEXP:RAD54L:chr1:46713367:46744145:+:8438	RAD54L	GEXP	1	46713367	46744145	500000000	30.8	38.9	0.623	353
N:GEXP:DHX37:chr12:125431370:125473667:-:57647	DHX37	GEXP	12	125431370	125473667	N:GEXP:POLQ:chr3:121150273:121264853:-:10721	POLQ	GEXP	3	121150273	121264853	500000000	30.6	38.7	0.621	353
N:GEXP:DHX37:chr12:125431370:125473667:-:57647	DHX37	GEXP	12	125431370	125473667	N:GEXP:KNTC1:chr12:123011809:123110947:+:9735	KNTC1	GEXP	12	123011809	123110947	2320423	30.4	38.4	0.62	353
N:GEXP:DHX37:chr12:125431370:125473667:-:57647	DHX37	GEXP	12	125431370	125473667	N:GEXP:MKI67:chr10:129894925:129924468:-:4288	MKI67	GEXP	10	129894925	129924468	500000000	29.9	37.9	0.617	353
N:GEXP:DHX37:chr12:125431370:125473667:-:57647	DHX37	GEXP	12	125431370	125473667	N:GEXP:GSG2:chr17:3627197:3629992:+:83903	GSG2	GEXP	17	3627197	3629992	500000000	29.8	37.9	0.616	353
N:GEXP:DHX37:chr12:125431370:125473667:-:57647	DHX37	GEXP	12	125431370	125473667	N:GEXP:SETD8:chr12:123868704:123893900:+:387893	SETD8	GEXP	12	123868704	123893900	1537470	29.5	37.6	0.615	353
N:GEXP:DHX37:chr12:125431370:125473667:-:57647	DHX37	GEXP	12	125431370	125473667	N:GEXP:KIF4A:chrX:69509879:69640774:+:24137	KIF4A	GEXP	X	69509879	69640774	500000000	29.4	37.5	0.614	353
N:GEXP:DHX37:chr12:125431370:125473667:-:57647	DHX37	GEXP	12	125431370	125473667	N:GEXP:PLK1:chr16:23690201:23701688:+:5347	PLK1	GEXP	16	23690201	23701688	500000000	28.9	37	0.61	353
N:GEXP:DHX37:chr12:125431370:125473667:-:57647	DHX37	GEXP	12	125431370	125473667	N:GEXP:RAB35:chr12:120532899:120554643:-:11021	RAB35	GEXP	12	120532899	120554643	4876727	29	37	0.611	353
N:GEXP:DHX37:chr12:125431370:125473667:-:57647	DHX37	GEXP	12	125431370	125473667	N:GEXP:HCFC1:chrX:153213008:153236819:-:3054	HCFC1	GEXP	X	153213008	153236819	500000000	28.3	36.4	0.606	353
N:GEXP:BUB1B:chr15:40453210:40513337:+:701	BUB1B	GEXP	15	40453210	40513337	N:GEXP:DHX37:chr12:125431370:125473667:-:57647	DHX37	GEXP	12	125431370	125473667	500000000	28.3	36.4	0.606	353
N:GEXP:DHX37:chr12:125431370:125473667:-:57647	DHX37	GEXP	12	125431370	125473667	N:GEXP:TACC3:chr4:1723217:1746905:+:10460	TACC3	GEXP	4	1723217	1746905	500000000	28.2	36.3	0.606	353
N:GEXP:DHX37:chr12:125431370:125473667:-:57647	DHX37	GEXP	12	125431370	125473667	N:GEXP:MCM2:chr3:127317253:127341278:+:4171	MCM2	GEXP	3	127317253	127341278	500000000	28.1	36.1	0.605	353
N:GEXP:DHX37:chr12:125431370:125473667:-:57647	DHX37	GEXP	12	125431370	125473667	N:GEXP:UHRF1:chr19:4909510:4962165:+:29128	UHRF1	GEXP	19	4909510	4962165	500000000	27.8	35.9	0.603	353
N:GEXP:BLM:chr15:91260579:91358686:+:641	BLM	GEXP	15	91260579	91358686	N:GEXP:DHX37:chr12:125431370:125473667:-:57647	DHX37	GEXP	12	125431370	125473667	500000000	27.4	35.4	0.6	353
N:GEXP:DHX37:chr12:125431370:125473667:-:57647	DHX37	GEXP	12	125431370	125473667	N:GEXP:FAM72D:chr1:143896452:143913143:-:728833	FAM72D	GEXP	1	143896452	143913143	500000000	27.3	35.3	0.599	353
N:GEXP:DHX37:chr12:125431370:125473667:-:57647	DHX37	GEXP	12	125431370	125473667	N:GEXP:KIF23:chr15:69706627:69740764:+:9493	KIF23	GEXP	15	69706627	69740764	500000000	27.1	35.2	0.598	353
N:GEXP:DHX37:chr12:125431370:125473667:-:57647	DHX37	GEXP	12	125431370	125473667	N:GEXP:SRRT:chr7:100472701:100486285:+:51593	SRRT	GEXP	7	100472701	100486285	500000000	27.1	35.2	0.598	353
N:GEXP:DHX37:chr12:125431370:125473667:-:57647	DHX37	GEXP	12	125431370	125473667	N:GEXP:TPX2:chr20:30326904:30389603:+:22974	TPX2	GEXP	20	30326904	30389603	500000000	27	35.1	0.598	353
N:GEXP:ARHGAP11A:chr15:32907345:32931868:+:9824	ARHGAP11A	GEXP	15	32907345	32931868	N:GEXP:DHX37:chr12:125431370:125473667:-:57647	DHX37	GEXP	12	125431370	125473667	500000000	26.9	35	0.597	353
N:GEXP:DHX37:chr12:125431370:125473667:-:57647	DHX37	GEXP	12	125431370	125473667	N:GEXP:ORC1:chr1:52838501:52870143:-:4998	ORC1	GEXP	1	52838501	52870143	500000000	26.6	34.7	0.595	353
N:GEXP:ARHGAP11B:chr15:30916697:30977810:+:89839	ARHGAP11B	GEXP	15	30916697	30977810	N:GEXP:DHX37:chr12:125431370:125473667:-:57647	DHX37	GEXP	12	125431370	125473667	500000000	26.7	34.7	0.595	353
N:GEXP:CDT1:chr16:88870186:88875666:+:81620	CDT1	GEXP	16	88870186	88875666	N:GEXP:DHX37:chr12:125431370:125473667:-:57647	DHX37	GEXP	12	125431370	125473667	500000000	26.6	34.7	0.595	353
N:GEXP:CENPE:chr4:104026963:104119566:-:1062	CENPE	GEXP	4	104026963	104119566	N:GEXP:DHX37:chr12:125431370:125473667:-:57647	DHX37	GEXP	12	125431370	125473667	500000000	26.5	34.6	0.594	353
N:GEXP:CDCA5:chr11:64844927:64851615:-:113130	CDCA5	GEXP	11	64844927	64851615	N:GEXP:DHX37:chr12:125431370:125473667:-:57647	DHX37	GEXP	12	125431370	125473667	500000000	26.4	34.5	0.593	353
N:GEXP:DHX37:chr12:125431370:125473667:-:57647	DHX37	GEXP	12	125431370	125473667	N:GEXP:KIF14:chr1:200520625:200589862:-:9928	KIF14	GEXP	1	200520625	200589862	500000000	26.4	34.4	0.593	353
N:GEXP:DHX37:chr12:125431370:125473667:-:57647	DHX37	GEXP	12	125431370	125473667	N:GEXP:PRR11:chr17:57232860:57284070:+:55771	PRR11	GEXP	17	57232860	57284070	500000000	26.2	34.2	0.591	353
N:GEXP:CDC25A:chr3:48198668:48229801:-:993	CDC25A	GEXP	3	48198668	48229801	N:GEXP:DHX37:chr12:125431370:125473667:-:57647	DHX37	GEXP	12	125431370	125473667	500000000	26.1	34.2	0.591	353
N:GEXP:DHX37:chr12:125431370:125473667:-:57647	DHX37	GEXP	12	125431370	125473667	N:GEXP:PKMYT1:chr16:3022792:3030540:-:9088	PKMYT1	GEXP	16	3022792	3030540	500000000	26.1	34.1	0.591	353
N:GEXP:CHFR:chr12:133416938:133464204:-:55743	CHFR	GEXP	12	133416938	133464204	N:GEXP:DHX37:chr12:125431370:125473667:-:57647	DHX37	GEXP	12	125431370	125473667	7943271	25.9	33.9	0.589	353
N:GEXP:DHX37:chr12:125431370:125473667:-:57647	DHX37	GEXP	12	125431370	125473667	N:GEXP:TROAP:chr12:49716971:49725514:+:10024	TROAP	GEXP	12	49716971	49725514	75705856	25.7	33.8	0.588	353
N:GEXP:DHX37:chr12:125431370:125473667:-:57647	DHX37	GEXP	12	125431370	125473667	N:GEXP:WHSC1:chr4:1873123:1983934:+:7468	WHSC1	GEXP	4	1873123	1983934	500000000	25.7	33.8	0.588	353
N:GEXP:DHX37:chr12:125431370:125473667:-:57647	DHX37	GEXP	12	125431370	125473667	N:GEXP:RECQL4:chr8:145736667:145743210:-:9401	RECQL4	GEXP	8	145736667	145743210	500000000	25.7	33.8	0.588	353
N:GEXP:CAMKK2:chr12:121675495:121736111:-:10645	CAMKK2	GEXP	12	121675495	121736111	N:GEXP:DHX37:chr12:125431370:125473667:-:57647	DHX37	GEXP	12	125431370	125473667	3695259	25.5	33.6	0.586	353
N:GEXP:DHX37:chr12:125431370:125473667:-:57647	DHX37	GEXP	12	125431370	125473667	N:GEXP:LMNB1:chr5:126112315:126172712:+:4001	LMNB1	GEXP	5	126112315	126172712	500000000	25.5	33.6	0.586	353
N:GEXP:DHX37:chr12:125431370:125473667:-:57647	DHX37	GEXP	12	125431370	125473667	N:GEXP:GTSE1:chr22:46692638:46726707:+:51512	GTSE1	GEXP	22	46692638	46726707	500000000	25.5	33.6	0.586	353
N:GEXP:DHX37:chr12:125431370:125473667:-:57647	DHX37	GEXP	12	125431370	125473667	N:GEXP:PRC1:chr15:91509268:91537804:-:9055	PRC1	GEXP	15	91509268	91537804	500000000	25.4	33.5	0.586	353
N:GEXP:DHX37:chr12:125431370:125473667:-:57647	DHX37	GEXP	12	125431370	125473667	N:GEXP:KIFC1:chr6:33359313:33377699:+:3833	KIFC1	GEXP	6	33359313	33377699	500000000	25.3	33.4	0.585	353
N:GEXP:DENR:chr12:123237371:123255953:+:8562	DENR	GEXP	12	123237371	123255953	N:GEXP:DHX37:chr12:125431370:125473667:-:57647	DHX37	GEXP	12	125431370	125473667	2175417	25.3	33.4	0.585	353
N:GEXP:DHX37:chr12:125431370:125473667:-:57647	DHX37	GEXP	12	125431370	125473667	N:GEXP:LOC100128191:chr12:98906751:98910004:-:100128191	LOC100128191	GEXP	12	98906751	98910004	26521366	25.3	33.4	0.585	353
N:GEXP:BRCA1:chr17:41196312:41322420:-:672	BRCA1	GEXP	17	41196312	41322420	N:GEXP:DHX37:chr12:125431370:125473667:-:57647	DHX37	GEXP	12	125431370	125473667	500000000	25.2	33.3	0.585	353
N:GEXP:DDX55:chr12:124086672:124105482:+:57696	DDX55	GEXP	12	124086672	124105482	N:GEXP:DHX37:chr12:125431370:125473667:-:57647	DHX37	GEXP	12	125431370	125473667	1325888	25.2	33.3	0.584	353
N:GEXP:DHX37:chr12:125431370:125473667:-:57647	DHX37	GEXP	12	125431370	125473667	N:GEXP:NCAPD3:chr11:134022337:134094426:-:23310	NCAPD3	GEXP	11	134022337	134094426	500000000	25.2	33.2	0.584	353
N:GEXP:DHX37:chr12:125431370:125473667:-:57647	DHX37	GEXP	12	125431370	125473667	N:GEXP:MCM4:chr8:48872763:48890719:+:4173	MCM4	GEXP	8	48872763	48890719	500000000	24.7	32.8	0.581	353
N:GEXP:DHX37:chr12:125431370:125473667:-:57647	DHX37	GEXP	12	125431370	125473667	N:GEXP:TMEM9B:chr11:8968840:8986481:-:56674	TMEM9B	GEXP	11	8968840	8986481	500000000	24.6	32.7	-0.58	353
N:GEXP:DHX37:chr12:125431370:125473667:-:57647	DHX37	GEXP	12	125431370	125473667	N:GEXP:DNMT1:chr19:10244022:10305755:-:1786	DNMT1	GEXP	19	10244022	10305755	500000000	24.5	32.6	0.579	353
N:GEXP:DHX37:chr12:125431370:125473667:-:57647	DHX37	GEXP	12	125431370	125473667	N:GEXP:EFTUD2:chr17:42927655:42976993:-:9343	EFTUD2	GEXP	17	42927655	42976993	500000000	24.6	32.6	0.58	353
N:GEXP:DHX37:chr12:125431370:125473667:-:57647	DHX37	GEXP	12	125431370	125473667	N:GEXP:FAM72B:chr1:120839005:120855681:+:653820	FAM72B	GEXP	1	120839005	120855681	500000000	24.4	32.5	0.579	353
N:GEXP:DHX37:chr12:125431370:125473667:-:57647	DHX37	GEXP	12	125431370	125473667	N:GEXP:RBM28:chr7:127950436:127983962:-:55131	RBM28	GEXP	7	127950436	127983962	500000000	24.2	32.3	0.577	353
N:GEXP:DHX37:chr12:125431370:125473667:-:57647	DHX37	GEXP	12	125431370	125473667	N:GEXP:EXO1:chr1:242011493:242053241:+:9156	EXO1	GEXP	1	242011493	242053241	500000000	23.9	32	0.575	353
N:GEXP:DHX37:chr12:125431370:125473667:-:57647	DHX37	GEXP	12	125431370	125473667	N:GEXP:KIF2C:chr1:45205490:45233438:+:11004	KIF2C	GEXP	1	45205490	45233438	500000000	24	32	0.575	353
N:GEXP:DHX37:chr12:125431370:125473667:-:57647	DHX37	GEXP	12	125431370	125473667	N:GEXP:NCAPH:chr2:97001484:97041274:+:23397	NCAPH	GEXP	2	97001484	97041274	500000000	23.8	31.9	0.574	353
N:GEXP:DHX37:chr12:125431370:125473667:-:57647	DHX37	GEXP	12	125431370	125473667	N:GEXP:SMPD4:chr2:130908965:130940323:-:55627	SMPD4	GEXP	2	130908965	130940323	500000000	23.7	31.8	0.573	353
N:GEXP:CHEK1:chr11:125495031:125546150:+:1111	CHEK1	GEXP	11	125495031	125546150	N:GEXP:DHX37:chr12:125431370:125473667:-:57647	DHX37	GEXP	12	125431370	125473667	500000000	23.6	31.6	0.572	353
N:GEXP:DHX37:chr12:125431370:125473667:-:57647	DHX37	GEXP	12	125431370	125473667	N:GEXP:PTPN11:chr12:112856536:112947717:+:5781	PTPN11	GEXP	12	112856536	112947717	12483653	23.6	31.6	0.572	353
N:GEXP:C17ORF53:chr17:42219274:42239844:+:78995	C17ORF53	GEXP	17	42219274	42239844	N:GEXP:DHX37:chr12:125431370:125473667:-:57647	DHX37	GEXP	12	125431370	125473667	500000000	23.4	31.5	0.571	353
N:GEXP:DHX37:chr12:125431370:125473667:-:57647	DHX37	GEXP	12	125431370	125473667	N:GEXP:SPHAR:chr1:229440129:229441250:+:10638	SPHAR	GEXP	1	229440129	229441250	500000000	23.4	31.4	-0.57	353
N:GEXP:DHX37:chr12:125431370:125473667:-:57647	DHX37	GEXP	12	125431370	125473667	N:GEXP:MPHOSPH9:chr12:123640946:123717658:-:10198	MPHOSPH9	GEXP	12	123640946	123717658	1713712	23.3	31.4	0.57	353
N:GEXP:DHX37:chr12:125431370:125473667:-:57647	DHX37	GEXP	12	125431370	125473667	N:GEXP:FEN1:chr11:61560109:61564714:+:2237	FEN1	GEXP	11	61560109	61564714	500000000	23.1	31.2	0.569	353
N:GEXP:DHX37:chr12:125431370:125473667:-:57647	DHX37	GEXP	12	125431370	125473667	N:GEXP:MCM7:chr7:99690404:99699427:-:4176	MCM7	GEXP	7	99690404	99699427	500000000	22.9	31	0.567	353
N:GEXP:DHX37:chr12:125431370:125473667:-:57647	DHX37	GEXP	12	125431370	125473667	N:GEXP:SBNO1:chr12:123773656:123849388:-:55206	SBNO1	GEXP	12	123773656	123849388	1581982	22.9	31	0.567	353
N:GEXP:DHX37:chr12:125431370:125473667:-:57647	DHX37	GEXP	12	125431370	125473667	N:GEXP:MYBL2:chr20:42295709:42345122:+:4605	MYBL2	GEXP	20	42295709	42345122	500000000	23	31	0.567	353
N:GEXP:DHX37:chr12:125431370:125473667:-:57647	DHX37	GEXP	12	125431370	125473667	N:GEXP:UTP20:chr12:101673905:101780397:+:27340	UTP20	GEXP	12	101673905	101780397	23650973	22.9	31	0.567	353
N:GEXP:DHX37:chr12:125431370:125473667:-:57647	DHX37	GEXP	12	125431370	125473667	N:GEXP:MCM10:chr10:13203554:13253104:+:55388	MCM10	GEXP	10	13203554	13253104	500000000	23	31	0.567	353
N:GEXP:DHX37:chr12:125431370:125473667:-:57647	DHX37	GEXP	12	125431370	125473667	N:GEXP:TCOF1:chr5:149737202:149779871:+:6949	TCOF1	GEXP	5	149737202	149779871	500000000	22.6	30.7	0.565	353
N:GEXP:DHX37:chr12:125431370:125473667:-:57647	DHX37	GEXP	12	125431370	125473667	N:GEXP:NOC4L:chr12:132628993:132636986:+:79050	NOC4L	GEXP	12	132628993	132636986	7155326	22.5	30.6	0.564	353
N:GEXP:DHX37:chr12:125431370:125473667:-:57647	DHX37	GEXP	12	125431370	125473667	N:GEXP:PRDM4:chr12:108126643:108155021:-:11108	PRDM4	GEXP	12	108126643	108155021	17276349	22.5	30.6	0.564	353
N:GEXP:CCNF:chr16:2479395:2508859:+:899	CCNF	GEXP	16	2479395	2508859	N:GEXP:DHX37:chr12:125431370:125473667:-:57647	DHX37	GEXP	12	125431370	125473667	500000000	22.5	30.5	0.564	353
N:GEXP:CDC20:chr1:43824626:43828873:+:991	CDC20	GEXP	1	43824626	43828873	N:GEXP:DHX37:chr12:125431370:125473667:-:57647	DHX37	GEXP	12	125431370	125473667	500000000	22.4	30.5	0.563	353
N:GEXP:DHX37:chr12:125431370:125473667:-:57647	DHX37	GEXP	12	125431370	125473667	N:GEXP:NCAPG2:chr7:158424003:158497520:-:54892	NCAPG2	GEXP	7	158424003	158497520	500000000	22.3	30.4	0.562	353
N:GEXP:DHX37:chr12:125431370:125473667:-:57647	DHX37	GEXP	12	125431370	125473667	N:GEXP:EP400:chr12:132434465:132565011:+:57634	EP400	GEXP	12	132434465	132565011	6960798	22	30.1	0.56	353
N:GEXP:DHX37:chr12:125431370:125473667:-:57647	DHX37	GEXP	12	125431370	125473667	N:GEXP:KIF15:chr3:44803209:44894748:+:56992	KIF15	GEXP	3	44803209	44894748	500000000	22	30	0.559	353
N:GEXP:CDCA3:chr12:6953963:6960456:-:83461	CDCA3	GEXP	12	6953963	6960456	N:GEXP:DHX37:chr12:125431370:125473667:-:57647	DHX37	GEXP	12	125431370	125473667	118470914	22	30	0.559	353
N:GEXP:DHX37:chr12:125431370:125473667:-:57647	DHX37	GEXP	12	125431370	125473667	N:GEXP:POLR1A:chr2:86253451:86333278:-:25885	POLR1A	GEXP	2	86253451	86333278	500000000	21.8	29.9	0.558	353
N:GEXP:DHX37:chr12:125431370:125473667:-:57647	DHX37	GEXP	12	125431370	125473667	N:GEXP:WDR62:chr19:36545783:36596012:+:284403	WDR62	GEXP	19	36545783	36596012	500000000	21.7	29.8	0.557	353
N:GEXP:DHX37:chr12:125431370:125473667:-:57647	DHX37	GEXP	12	125431370	125473667	N:GEXP:TOPBP1:chr3:133319449:133380737:-:11073	TOPBP1	GEXP	3	133319449	133380737	500000000	21.7	29.8	0.557	353
N:GEXP:DHX37:chr12:125431370:125473667:-:57647	DHX37	GEXP	12	125431370	125473667	N:GEXP:E2F2:chr1:23832920:23857712:-:1870	E2F2	GEXP	1	23832920	23857712	500000000	21.7	29.8	0.558	353
N:GEXP:DHX37:chr12:125431370:125473667:-:57647	DHX37	GEXP	12	125431370	125473667	N:GEXP:XRCC2:chr7:152343587:152373250:-:7516	XRCC2	GEXP	7	152343587	152373250	500000000	21.7	29.7	0.557	353
N:GEXP:DHX37:chr12:125431370:125473667:-:57647	DHX37	GEXP	12	125431370	125473667	N:GEXP:TMEM50B:chr21:34804793:34852316:-:757	TMEM50B	GEXP	21	34804793	34852316	500000000	21.5	29.6	-0.556	353
N:GEXP:CENPF:chr1:214776532:214837914:+:1063	CENPF	GEXP	1	214776532	214837914	N:GEXP:DHX37:chr12:125431370:125473667:-:57647	DHX37	GEXP	12	125431370	125473667	500000000	21.5	29.6	0.556	353
N:GEXP:DHX37:chr12:125431370:125473667:-:57647	DHX37	GEXP	12	125431370	125473667	N:GEXP:UBE2S:chr19:55912650:55919325:-:27338	UBE2S	GEXP	19	55912650	55919325	500000000	21.5	29.6	0.556	353
N:GEXP:DHX37:chr12:125431370:125473667:-:57647	DHX37	GEXP	12	125431370	125473667	N:GEXP:KPNB1:chr17:45727275:45761004:+:3837	KPNB1	GEXP	17	45727275	45761004	500000000	21.6	29.6	0.556	353
N:GEXP:DHX37:chr12:125431370:125473667:-:57647	DHX37	GEXP	12	125431370	125473667	N:GEXP:FAM72A:chr1:206138911:206155074:+:729533	FAM72A	GEXP	1	206138911	206155074	500000000	21.3	29.4	0.554	353
N:GEXP:DHX37:chr12:125431370:125473667:-:57647	DHX37	GEXP	12	125431370	125473667	N:GEXP:UNG:chr12:109535399:109548798:+:7374	UNG	GEXP	12	109535399	109548798	15882572	21.3	29.4	0.554	353
N:GEXP:DHX37:chr12:125431370:125473667:-:57647	DHX37	GEXP	12	125431370	125473667	N:GEXP:FANCA:chr16:89803959:89883065:-:2175	FANCA	GEXP	16	89803959	89883065	500000000	21.3	29.4	0.554	353
N:GEXP:CTSH:chr15:79214092:79237420:-:1512	CTSH	GEXP	15	79214092	79237420	N:GEXP:DHX37:chr12:125431370:125473667:-:57647	DHX37	GEXP	12	125431370	125473667	500000000	21.3	29.4	-0.554	353
N:GEXP:DHX37:chr12:125431370:125473667:-:57647	DHX37	GEXP	12	125431370	125473667	N:GEXP:YPEL5:chr2:30369750:30383399:+:51646	YPEL5	GEXP	2	30369750	30383399	500000000	21.4	29.4	-0.555	353
N:GEXP:CDC6:chr17:38444146:38459413:+:990	CDC6	GEXP	17	38444146	38459413	N:GEXP:DHX37:chr12:125431370:125473667:-:57647	DHX37	GEXP	12	125431370	125473667	500000000	21.2	29.3	0.553	353
N:GEXP:CENPO:chr2:25016175:25045245:+:79172	CENPO	GEXP	2	25016175	25045245	N:GEXP:DHX37:chr12:125431370:125473667:-:57647	DHX37	GEXP	12	125431370	125473667	500000000	21.2	29.3	0.553	353
N:GEXP:DHX37:chr12:125431370:125473667:-:57647	DHX37	GEXP	12	125431370	125473667	N:GEXP:SLC7A1:chr13:30083551:30169825:-:6541	SLC7A1	GEXP	13	30083551	30169825	500000000	21.1	29.2	0.552	353
N:GEXP:CASC5:chr15:40886447:40954881:+:57082	CASC5	GEXP	15	40886447	40954881	N:GEXP:DHX37:chr12:125431370:125473667:-:57647	DHX37	GEXP	12	125431370	125473667	500000000	21.1	29.2	0.553	353
N:GEXP:C16ORF59:chr16:2510115:2514964:+:80178	C16ORF59	GEXP	16	2510115	2514964	N:GEXP:DHX37:chr12:125431370:125473667:-:57647	DHX37	GEXP	12	125431370	125473667	500000000	21.2	29.2	0.553	353
N:GEXP:DHX37:chr12:125431370:125473667:-:57647	DHX37	GEXP	12	125431370	125473667	N:GEXP:KHSRP:chr19:6413119:6424822:-:8570	KHSRP	GEXP	19	6413119	6424822	500000000	21.1	29.2	0.552	353
N:GEXP:DHX37:chr12:125431370:125473667:-:57647	DHX37	GEXP	12	125431370	125473667	N:GEXP:KIF11:chr10:94352825:94415152:+:3832	KIF11	GEXP	10	94352825	94415152	500000000	21	29.1	0.552	353
N:GEXP:ASPM:chr1:197053257:197115824:-:259266	ASPM	GEXP	1	197053257	197115824	N:GEXP:DHX37:chr12:125431370:125473667:-:57647	DHX37	GEXP	12	125431370	125473667	500000000	21	29.1	0.551	353
N:GEXP:DHX37:chr12:125431370:125473667:-:57647	DHX37	GEXP	12	125431370	125473667	N:GEXP:RACGAP1:chr12:50382945:50419307:-:29127	RACGAP1	GEXP	12	50382945	50419307	75012063	20.9	29	0.551	353
N:GEXP:DHX37:chr12:125431370:125473667:-:57647	DHX37	GEXP	12	125431370	125473667	N:GEXP:PDCD11:chr10:105156412:105206019:+:22984	PDCD11	GEXP	10	105156412	105206019	500000000	20.9	29	0.551	353
N:GEXP:ATAD5:chr17:29159023:29222295:+:79915	ATAD5	GEXP	17	29159023	29222295	N:GEXP:DHX37:chr12:125431370:125473667:-:57647	DHX37	GEXP	12	125431370	125473667	500000000	20.8	28.9	0.55	353
N:GEXP:BRI3BP:chr12:125478194:125510349:+:140707	BRI3BP	GEXP	12	125478194	125510349	N:GEXP:DHX37:chr12:125431370:125473667:-:57647	DHX37	GEXP	12	125431370	125473667	4527	20.7	28.8	0.549	353
N:GEXP:DHX37:chr12:125431370:125473667:-:57647	DHX37	GEXP	12	125431370	125473667	N:GEXP:TSPAN3:chr15:77336360:77363570:-:10099	TSPAN3	GEXP	15	77336360	77363570	500000000	20.7	28.8	-0.549	353
N:GEXP:DHX37:chr12:125431370:125473667:-:57647	DHX37	GEXP	12	125431370	125473667	N:GEXP:EIF2C2:chr8:141541264:141645646:-:27161	EIF2C2	GEXP	8	141541264	141645646	500000000	20.6	28.7	0.548	353
N:GEXP:DHX37:chr12:125431370:125473667:-:57647	DHX37	GEXP	12	125431370	125473667	N:GEXP:TOP2A:chr17:38544773:38574202:-:7153	TOP2A	GEXP	17	38544773	38574202	500000000	20.6	28.7	0.548	353
N:GEXP:DHX37:chr12:125431370:125473667:-:57647	DHX37	GEXP	12	125431370	125473667	N:GEXP:PTBP1:chr19:797392:812327:+:5725	PTBP1	GEXP	19	797392	812327	500000000	20.6	28.7	0.549	353
N:GEXP:AGR3:chr7:16899030:16921613:-:155465	AGR3	GEXP	7	16899030	16921613	N:GEXP:DHX37:chr12:125431370:125473667:-:57647	DHX37	GEXP	12	125431370	125473667	500000000	20.7	28.7	-0.549	353
N:GEXP:DHX37:chr12:125431370:125473667:-:57647	DHX37	GEXP	12	125431370	125473667	N:GEXP:KIAA1524:chr3:108268718:108308491:-:57650	KIAA1524	GEXP	3	108268718	108308491	500000000	20.5	28.6	0.548	353
N:GEXP:DHX37:chr12:125431370:125473667:-:57647	DHX37	GEXP	12	125431370	125473667	N:GEXP:POP1:chr8:99129521:99172069:+:10940	POP1	GEXP	8	99129521	99172069	500000000	20.3	28.4	0.546	353
N:GEXP:DHX37:chr12:125431370:125473667:-:57647	DHX37	GEXP	12	125431370	125473667	N:GEXP:IQGAP3:chr1:156495197:156542396:-:128239	IQGAP3	GEXP	1	156495197	156542396	500000000	20.2	28.3	0.545	353
N:GEXP:DHX37:chr12:125431370:125473667:-:57647	DHX37	GEXP	12	125431370	125473667	N:GEXP:RFC5:chr12:118454506:118470042:+:5985	RFC5	GEXP	12	118454506	118470042	6961328	20.2	28.2	0.545	353
N:GEXP:BUB1:chr2:111395409:111435684:-:699	BUB1	GEXP	2	111395409	111435684	N:GEXP:DHX37:chr12:125431370:125473667:-:57647	DHX37	GEXP	12	125431370	125473667	500000000	20	28.1	0.544	353
N:GEXP:DHX37:chr12:125431370:125473667:-:57647	DHX37	GEXP	12	125431370	125473667	N:GEXP:SFSWAP:chr12:132195635:132284282:+:6433	SFSWAP	GEXP	12	132195635	132284282	6721968	20	28.1	0.543	353
N:GEXP:DHX37:chr12:125431370:125473667:-:57647	DHX37	GEXP	12	125431370	125473667	N:GEXP:SFTA1P:chr10:10826402:10836877:-:207107	SFTA1P	GEXP	10	10826402	10836877	500000000	20	28.1	-0.544	353
N:GEXP:DHX37:chr12:125431370:125473667:-:57647	DHX37	GEXP	12	125431370	125473667	N:GEXP:PLK4:chr4:128802016:128820377:+:10733	PLK4	GEXP	4	128802016	128820377	500000000	19.9	28	0.543	353
N:GEXP:DHX37:chr12:125431370:125473667:-:57647	DHX37	GEXP	12	125431370	125473667	N:GEXP:PCNXL3:chr11:65383783:65404910:+:399909	PCNXL3	GEXP	11	65383783	65404910	500000000	19.9	28	0.543	353
N:GEXP:DHX37:chr12:125431370:125473667:-:57647	DHX37	GEXP	12	125431370	125473667	N:GEXP:XPO5:chr6:43490068:43543812:-:57510	XPO5	GEXP	6	43490068	43543812	500000000	19.9	28	0.543	353
N:GEXP:DHX37:chr12:125431370:125473667:-:57647	DHX37	GEXP	12	125431370	125473667	N:GEXP:SEPW1:chr19:48281842:48287943:+:6415	SEPW1	GEXP	19	48281842	48287943	500000000	19.8	27.9	-0.542	353
N:GEXP:DHX37:chr12:125431370:125473667:-:57647	DHX37	GEXP	12	125431370	125473667	N:GEXP:SGOL1:chr3:20202085:20227724:-:151648	SGOL1	GEXP	3	20202085	20227724	500000000	19.7	27.8	0.541	353
N:CNVR:TMEM132B:chr12:126127000:126129999::	chr12:126,127,000-126,129,999 (3Mb, TMEM132B)	CNVR	12	126127000	126129999	N:GEXP:DHX37:chr12:125431370:125473667:-:57647	DHX37	GEXP	12	125431370	125473667	653333	19.9	27.8	0.542	352
N:GEXP:AURKB:chr17:8108049:8113883:-:9212	AURKB	GEXP	17	8108049	8113883	N:GEXP:DHX37:chr12:125431370:125473667:-:57647	DHX37	GEXP	12	125431370	125473667	500000000	19.8	27.8	0.541	353
N:GEXP:DHX37:chr12:125431370:125473667:-:57647	DHX37	GEXP	12	125431370	125473667	N:GEXP:NCAPG:chr4:17812525:17846487:+:64151	NCAPG	GEXP	4	17812525	17846487	500000000	19.7	27.8	0.541	353
N:GEXP:CLPB:chr11:72003470:72145684:-:81570	CLPB	GEXP	11	72003470	72145684	N:GEXP:DHX37:chr12:125431370:125473667:-:57647	DHX37	GEXP	12	125431370	125473667	500000000	19.7	27.7	0.54	353
N:GEXP:DHX37:chr12:125431370:125473667:-:57647	DHX37	GEXP	12	125431370	125473667	N:GEXP:RANGAP1:chr22:41641615:41682216:-:5905	RANGAP1	GEXP	22	41641615	41682216	500000000	19.6	27.7	0.54	353
N:GEXP:DHX37:chr12:125431370:125473667:-:57647	DHX37	GEXP	12	125431370	125473667	N:GEXP:NPC2:chr14:74946643:74960084:-:10577	NPC2	GEXP	14	74946643	74960084	500000000	19.5	27.6	-0.539	353
N:GEXP:DHX37:chr12:125431370:125473667:-:57647	DHX37	GEXP	12	125431370	125473667	N:GEXP:LIG1:chr19:48618703:48673560:-:3978	LIG1	GEXP	19	48618703	48673560	500000000	19.5	27.6	0.539	353
N:GEXP:DHX37:chr12:125431370:125473667:-:57647	DHX37	GEXP	12	125431370	125473667	N:GEXP:ZNF598:chr16:2047768:2059763:-:90850	ZNF598	GEXP	16	2047768	2059763	500000000	19.5	27.6	0.539	353
N:GEXP:CCDC86:chr11:60609429:60618561:+:79080	CCDC86	GEXP	11	60609429	60618561	N:GEXP:DHX37:chr12:125431370:125473667:-:57647	DHX37	GEXP	12	125431370	125473667	500000000	19.5	27.5	0.539	353
N:GEXP:DHX37:chr12:125431370:125473667:-:57647	DHX37	GEXP	12	125431370	125473667	N:GEXP:NDFIP1:chr5:141488324:141534008:+:80762	NDFIP1	GEXP	5	141488324	141534008	500000000	19.4	27.5	-0.538	353
N:GEXP:C11ORF82:chr11:82612737:82669319:+:220042	C11ORF82	GEXP	11	82612737	82669319	N:GEXP:DHX37:chr12:125431370:125473667:-:57647	DHX37	GEXP	12	125431370	125473667	500000000	19.4	27.5	0.538	353
N:GEXP:DHX37:chr12:125431370:125473667:-:57647	DHX37	GEXP	12	125431370	125473667	N:GEXP:HJURP:chr2:234745486:234763212:-:55355	HJURP	GEXP	2	234745486	234763212	500000000	19.4	27.4	0.538	353
N:GEXP:DHX37:chr12:125431370:125473667:-:57647	DHX37	GEXP	12	125431370	125473667	N:GEXP:HOPX:chr4:57514154:57547872:-:84525	HOPX	GEXP	4	57514154	57547872	500000000	19.3	27.4	-0.537	353
N:GEXP:DHX37:chr12:125431370:125473667:-:57647	DHX37	GEXP	12	125431370	125473667	N:GEXP:SKA1:chr18:47901392:47920538:+:220134	SKA1	GEXP	18	47901392	47920538	500000000	19.3	27.4	0.538	353
N:GEXP:DHX37:chr12:125431370:125473667:-:57647	DHX37	GEXP	12	125431370	125473667	N:GEXP:EME1:chr17:48450581:48458820:+:146956	EME1	GEXP	17	48450581	48458820	500000000	19.2	27.3	0.536	353
N:GEXP:DHX37:chr12:125431370:125473667:-:57647	DHX37	GEXP	12	125431370	125473667	N:GEXP:EIF4G1:chr3:184032283:184053146:+:1981	EIF4G1	GEXP	3	184032283	184053146	500000000	19.2	27.3	0.536	353
N:GEXP:DHX37:chr12:125431370:125473667:-:57647	DHX37	GEXP	12	125431370	125473667	N:GEXP:NOP2:chr12:6666037:6677480:-:4839	NOP2	GEXP	12	6666037	6677480	118753890	19.2	27.3	0.537	353
N:GEXP:DHX37:chr12:125431370:125473667:-:57647	DHX37	GEXP	12	125431370	125473667	N:GEXP:FBRSL1:chr12:133067157:133161773:+:57666	FBRSL1	GEXP	12	133067157	133161773	7593490	19.2	27.3	0.537	353
N:GEXP:DHX37:chr12:125431370:125473667:-:57647	DHX37	GEXP	12	125431370	125473667	N:GEXP:FANCI:chr15:89787194:89860362:+:55215	FANCI	GEXP	15	89787194	89860362	500000000	19.2	27.2	0.536	353
N:GEXP:ANKRD52:chr12:56631588:56652143:-:283373	ANKRD52	GEXP	12	56631588	56652143	N:GEXP:DHX37:chr12:125431370:125473667:-:57647	DHX37	GEXP	12	125431370	125473667	68779227	19.1	27.2	0.536	353
N:GEXP:DHX37:chr12:125431370:125473667:-:57647	DHX37	GEXP	12	125431370	125473667	N:GEXP:SUDS3:chr12:118814358:118855840:+:64426	SUDS3	GEXP	12	118814358	118855840	6575530	19.1	27.2	0.536	353
N:GEXP:DHX37:chr12:125431370:125473667:-:57647	DHX37	GEXP	12	125431370	125473667	N:GEXP:SCP2:chr1:53392901:53517289:+:6342	SCP2	GEXP	1	53392901	53517289	500000000	19.1	27.2	-0.536	353
N:GEXP:DHX37:chr12:125431370:125473667:-:57647	DHX37	GEXP	12	125431370	125473667	N:GEXP:PRKDC:chr8:48685669:48872743:-:5591	PRKDC	GEXP	8	48685669	48872743	500000000	19	27.1	0.535	353
N:CNVR:12q24.3:chr12:125487000:126126999::	chr12:125,487,000-126,126,999 (640Mb, 12q24.3)	CNVR	12	125487000	126126999	N:GEXP:DHX37:chr12:125431370:125473667:-:57647	DHX37	GEXP	12	125431370	125473667	13333	19.2	27.1	0.536	352
N:GEXP:DHX37:chr12:125431370:125473667:-:57647	DHX37	GEXP	12	125431370	125473667	N:GEXP:E2F1:chr20:32263292:32274210:-:1869	E2F1	GEXP	20	32263292	32274210	500000000	18.9	27	0.534	353
N:CNVR:12q24.32:chr12:126130000:126993999::	chr12:126,130,000-126,993,999 (864Mb, 12q24.32)	CNVR	12	126130000	126993999	N:GEXP:DHX37:chr12:125431370:125473667:-:57647	DHX37	GEXP	12	125431370	125473667	656333	19.1	27	0.535	352
N:GEXP:AURKA:chr20:54944445:54967351:-:6790	AURKA	GEXP	20	54944445	54967351	N:GEXP:DHX37:chr12:125431370:125473667:-:57647	DHX37	GEXP	12	125431370	125473667	500000000	18.9	27	0.534	353
N:GEXP:DHX37:chr12:125431370:125473667:-:57647	DHX37	GEXP	12	125431370	125473667	N:GEXP:HNMT:chr2:138721808:138773934:+:3176	HNMT	GEXP	2	138721808	138773934	500000000	18.9	26.9	-0.534	353
N:GEXP:DHX37:chr12:125431370:125473667:-:57647	DHX37	GEXP	12	125431370	125473667	N:GEXP:NUP210:chr3:13357737:13461809:-:23225	NUP210	GEXP	3	13357737	13461809	500000000	18.8	26.9	0.533	353
N:GEXP:DHX37:chr12:125431370:125473667:-:57647	DHX37	GEXP	12	125431370	125473667	N:GEXP:UBE2O:chr17:74385613:74449288:-:63893	UBE2O	GEXP	17	74385613	74449288	500000000	18.7	26.8	0.533	353
N:GEXP:DHX37:chr12:125431370:125473667:-:57647	DHX37	GEXP	12	125431370	125473667	N:GEXP:PLLP:chr16:57290009:57318584:-:51090	PLLP	GEXP	16	57290009	57318584	500000000	18.8	26.8	-0.533	353
N:GEXP:DHX37:chr12:125431370:125473667:-:57647	DHX37	GEXP	12	125431370	125473667	N:GEXP:GINS4:chr8:41386725:41402565:+:84296	GINS4	GEXP	8	41386725	41402565	500000000	18.7	26.8	0.532	353
N:GEXP:DHX37:chr12:125431370:125473667:-:57647	DHX37	GEXP	12	125431370	125473667	N:GEXP:DNMT3B:chr20:31350191:31397162:+:1789	DNMT3B	GEXP	20	31350191	31397162	500000000	18.8	26.8	0.533	353
N:GEXP:ACLY:chr17:40023179:40075272:-:47	ACLY	GEXP	17	40023179	40075272	N:GEXP:DHX37:chr12:125431370:125473667:-:57647	DHX37	GEXP	12	125431370	125473667	500000000	18.5	26.6	0.53	353
N:GEXP:DHX37:chr12:125431370:125473667:-:57647	DHX37	GEXP	12	125431370	125473667	N:GEXP:TTK:chr6:80714322:80752244:+:7272	TTK	GEXP	6	80714322	80752244	500000000	18.4	26.5	0.529	353
N:GEXP:DHX37:chr12:125431370:125473667:-:57647	DHX37	GEXP	12	125431370	125473667	N:GEXP:FCER1A:chr1:159259506:159278014:+:2205	FCER1A	GEXP	1	159259506	159278014	500000000	18.4	26.5	-0.529	353
N:GEXP:CKAP2L:chr2:113495444:113522254:-:150468	CKAP2L	GEXP	2	113495444	113522254	N:GEXP:DHX37:chr12:125431370:125473667:-:57647	DHX37	GEXP	12	125431370	125473667	500000000	18.4	26.5	0.53	353
N:GEXP:CDCA2:chr8:25316513:25365425:+:157313	CDCA2	GEXP	8	25316513	25365425	N:GEXP:DHX37:chr12:125431370:125473667:-:57647	DHX37	GEXP	12	125431370	125473667	500000000	18.5	26.5	0.53	353
N:GEXP:ANAPC7:chr12:110810705:110841535:-:51434	ANAPC7	GEXP	12	110810705	110841535	N:GEXP:DHX37:chr12:125431370:125473667:-:57647	DHX37	GEXP	12	125431370	125473667	14589835	18.2	26.3	0.528	353
N:GEXP:DHX37:chr12:125431370:125473667:-:57647	DHX37	GEXP	12	125431370	125473667	N:GEXP:VPS33A:chr12:122692209:122751068:-:65082	VPS33A	GEXP	12	122692209	122751068	2680302	18.3	26.3	0.528	353
N:GEXP:DEPDC1:chr1:68939835:68962799:-:55635	DEPDC1	GEXP	1	68939835	68962799	N:GEXP:DHX37:chr12:125431370:125473667:-:57647	DHX37	GEXP	12	125431370	125473667	500000000	18.2	26.3	0.528	353
N:CNVR:12q24:chr12:119991000:125485999::	chr12:119,991,000-125,485,999 (5bp, 12q24)	CNVR	12	119991000	125485999	N:GEXP:DHX37:chr12:125431370:125473667:-:57647	DHX37	GEXP	12	125431370	125473667	0	18.4	26.3	0.529	352
N:GEXP:CDC45:chr22:19467414:19508135:+:8318	CDC45	GEXP	22	19467414	19508135	N:GEXP:DHX37:chr12:125431370:125473667:-:57647	DHX37	GEXP	12	125431370	125473667	500000000	18.3	26.3	0.528	353
N:GEXP:CENPA:chr2:27008882:27023934:+:1058	CENPA	GEXP	2	27008882	27023934	N:GEXP:DHX37:chr12:125431370:125473667:-:57647	DHX37	GEXP	12	125431370	125473667	500000000	18.2	26.2	0.527	353
N:GEXP:DHX37:chr12:125431370:125473667:-:57647	DHX37	GEXP	12	125431370	125473667	N:GEXP:SLC7A5:chr16:87863629:87903100:-:8140	SLC7A5	GEXP	16	87863629	87903100	500000000	18.1	26.2	0.527	353
N:GEXP:C1ORF135:chr1:26160497:26185848:-:79000	C1ORF135	GEXP	1	26160497	26185848	N:GEXP:DHX37:chr12:125431370:125473667:-:57647	DHX37	GEXP	12	125431370	125473667	500000000	18.1	26.1	0.526	353
N:GEXP:DHX37:chr12:125431370:125473667:-:57647	DHX37	GEXP	12	125431370	125473667	N:GEXP:FAM82A1:chr2:38152462:38294285:+:151393	FAM82A1	GEXP	2	38152462	38294285	500000000	18	26.1	-0.526	353
N:GEXP:DHX37:chr12:125431370:125473667:-:57647	DHX37	GEXP	12	125431370	125473667	N:GEXP:TMPO:chr12:98909351:98944157:+:7112	TMPO	GEXP	12	98909351	98944157	26487213	18	26	0.526	353
N:CNVR:12q24.32:chr12:127005000:127124999::	chr12:127,005,000-127,124,999 (120Mb, 12q24.32)	CNVR	12	127005000	127124999	N:GEXP:DHX37:chr12:125431370:125473667:-:57647	DHX37	GEXP	12	125431370	125473667	1531333	18	25.9	0.525	352
N:GEXP:DHX37:chr12:125431370:125473667:-:57647	DHX37	GEXP	12	125431370	125473667	N:GEXP:ITM2B:chr13:48807274:48836232:+:9445	ITM2B	GEXP	13	48807274	48836232	500000000	17.6	25.7	-0.522	353
N:GEXP:C9ORF100:chr9:35658872:35675863:-:84904	C9ORF100	GEXP	9	35658872	35675863	N:GEXP:DHX37:chr12:125431370:125473667:-:57647	DHX37	GEXP	12	125431370	125473667	500000000	17.7	25.7	0.523	353
N:GEXP:DHX37:chr12:125431370:125473667:-:57647	DHX37	GEXP	12	125431370	125473667	N:GEXP:RRP12:chr10:99116458:99161127:-:23223	RRP12	GEXP	10	99116458	99161127	500000000	17.6	25.7	0.523	353
N:GEXP:C10ORF2:chr10:102747293:102754158:+:56652	C10ORF2	GEXP	10	102747293	102754158	N:GEXP:DHX37:chr12:125431370:125473667:-:57647	DHX37	GEXP	12	125431370	125473667	500000000	17.5	25.6	0.522	353
N:GEXP:DHX37:chr12:125431370:125473667:-:57647	DHX37	GEXP	12	125431370	125473667	N:GEXP:PLBD2:chr12:113796371:113827458:+:196463	PLBD2	GEXP	12	113796371	113827458	11603912	17.6	25.6	0.522	353
N:GEXP:DHX34:chr19:47852538:47885961:+:9704	DHX34	GEXP	19	47852538	47885961	N:GEXP:DHX37:chr12:125431370:125473667:-:57647	DHX37	GEXP	12	125431370	125473667	500000000	17.4	25.5	0.521	353
N:GEXP:DHX37:chr12:125431370:125473667:-:57647	DHX37	GEXP	12	125431370	125473667	N:GEXP:STIL:chr1:47715811:47779819:-:6491	STIL	GEXP	1	47715811	47779819	500000000	17.4	25.5	0.52	353
N:GEXP:DHX37:chr12:125431370:125473667:-:57647	DHX37	GEXP	12	125431370	125473667	N:GEXP:SSRP1:chr11:57093459:57103351:-:6749	SSRP1	GEXP	11	57093459	57103351	500000000	17.3	25.4	0.52	353
N:GEXP:CD302:chr2:160625138:160654766:-:9936	CD302	GEXP	2	160625138	160654766	N:GEXP:DHX37:chr12:125431370:125473667:-:57647	DHX37	GEXP	12	125431370	125473667	500000000	17.3	25.4	-0.519	353
N:GEXP:DHX37:chr12:125431370:125473667:-:57647	DHX37	GEXP	12	125431370	125473667	N:GEXP:TMEM120B:chr12:122150658:122220907:+:144404	TMEM120B	GEXP	12	122150658	122220907	3210463	17.3	25.4	0.52	353
N:GEXP:ATP2A2:chr12:110719032:110788897:+:488	ATP2A2	GEXP	12	110719032	110788897	N:GEXP:DHX37:chr12:125431370:125473667:-:57647	DHX37	GEXP	12	125431370	125473667	14642473	17.1	25.2	0.518	353
N:GEXP:CDCA8:chr1:38158159:38175391:+:55143	CDCA8	GEXP	1	38158159	38175391	N:GEXP:DHX37:chr12:125431370:125473667:-:57647	DHX37	GEXP	12	125431370	125473667	500000000	17.1	25.2	0.518	353
N:GEXP:DHX37:chr12:125431370:125473667:-:57647	DHX37	GEXP	12	125431370	125473667	N:GEXP:IPO4:chr14:24649425:24659859:-:79711	IPO4	GEXP	14	24649425	24659859	500000000	17.2	25.2	0.518	353
Table8.KIRC
id_a	pretty_label_a	datatype_a	chr_a	start_a	end_a	id_b	pretty_label_b	datatype_b	chr_b	start_b	end_b	link_distance	adj_logged_pvalue	logged_pvalue	correlation	num_nonna
N:GEXP:DHX37:chr12:125431370:125473667:-:57647	DHX37	GEXP	12	125431370	125473667	N:GEXP:NCOR2:chr12:124808957:125052010:-:9612	NCOR2	GEXP	12	124808957	125052010	622413	63.9	72	0.675	538
N:GEXP:DHX37:chr12:125431370:125473667:-:57647	DHX37	GEXP	12	125431370	125473667	N:GEXP:EIF3B:chr7:2394474:2420377:+:8662	EIF3B	GEXP	7	2394474	2420377	500000000	58.6	66.7	0.656	538
N:GEXP:CGRRF1:chr14:54976587:55005334:+:10668	CGRRF1	GEXP	14	54976587	55005334	N:GEXP:DHX37:chr12:125431370:125473667:-:57647	DHX37	GEXP	12	125431370	125473667	500000000	58.1	66.2	-0.654	538
N:GEXP:DHX37:chr12:125431370:125473667:-:57647	DHX37	GEXP	12	125431370	125473667	N:GEXP:NUP62:chr19:50410084:50432988:-:23636	NUP62	GEXP	19	50410084	50432988	500000000	58.2	66.2	0.654	538
N:GEXP:DHX37:chr12:125431370:125473667:-:57647	DHX37	GEXP	12	125431370	125473667	N:GEXP:NCLN:chr19:3185875:3209573:+:56926	NCLN	GEXP	19	3185875	3209573	500000000	56.1	64.2	0.646	538
N:GEXP:DDX54:chr12:113594978:113623284:-:79039	DDX54	GEXP	12	113594978	113623284	N:GEXP:DHX37:chr12:125431370:125473667:-:57647	DHX37	GEXP	12	125431370	125473667	11836392	54.1	62.2	0.638	538
N:GEXP:DHX37:chr12:125431370:125473667:-:57647	DHX37	GEXP	12	125431370	125473667	N:GEXP:EMCN:chr4:101316498:101439250:-:51705	EMCN	GEXP	4	101316498	101439250	500000000	53.2	61.3	-0.635	538
N:GEXP:DHX37:chr12:125431370:125473667:-:57647	DHX37	GEXP	12	125431370	125473667	N:GEXP:POLD1:chr19:50887593:50921271:+:5424	POLD1	GEXP	19	50887593	50921271	500000000	53	61.1	0.634	538
N:GEXP:DHX37:chr12:125431370:125473667:-:57647	DHX37	GEXP	12	125431370	125473667	N:GEXP:NKIRAS1:chr3:23933572:23988053:-:28512	NKIRAS1	GEXP	3	23933572	23988053	500000000	50.6	58.7	-0.624	538
N:GEXP:DHX37:chr12:125431370:125473667:-:57647	DHX37	GEXP	12	125431370	125473667	N:GEXP:TCOF1:chr5:149737202:149779871:+:6949	TCOF1	GEXP	5	149737202	149779871	500000000	50.5	58.6	0.624	538
N:GEXP:DHX37:chr12:125431370:125473667:-:57647	DHX37	GEXP	12	125431370	125473667	N:GEXP:MYBBP1A:chr17:4442191:4458681:-:10514	MYBBP1A	GEXP	17	4442191	4458681	500000000	50.3	58.4	0.623	538
N:GEXP:DHX37:chr12:125431370:125473667:-:57647	DHX37	GEXP	12	125431370	125473667	N:GEXP:FOXM1:chr12:2966847:2986321:-:2305	FOXM1	GEXP	12	2966847	2986321	122464523	49.6	57.7	0.62	538
N:GEXP:DHX37:chr12:125431370:125473667:-:57647	DHX37	GEXP	12	125431370	125473667	N:GEXP:FAM188A:chr10:15820175:15902519:-:80013	FAM188A	GEXP	10	15820175	15902519	500000000	48.1	56.2	-0.613	538
N:GEXP:AP2A1:chr19:50270180:50310369:+:160	AP2A1	GEXP	19	50270180	50310369	N:GEXP:DHX37:chr12:125431370:125473667:-:57647	DHX37	GEXP	12	125431370	125473667	500000000	47.5	55.6	0.611	538
N:GEXP:DHX37:chr12:125431370:125473667:-:57647	DHX37	GEXP	12	125431370	125473667	N:GEXP:PLXNA1:chr3:126707437:126756235:+:5361	PLXNA1	GEXP	3	126707437	126756235	500000000	47.5	55.6	0.611	538
N:GEXP:DHX37:chr12:125431370:125473667:-:57647	DHX37	GEXP	12	125431370	125473667	N:GEXP:GLT25D1:chr19:17666511:17693965:+:79709	GLT25D1	GEXP	19	17666511	17693965	500000000	47.4	55.5	0.61	538
N:GEXP:DHX37:chr12:125431370:125473667:-:57647	DHX37	GEXP	12	125431370	125473667	N:GEXP:SBNO2:chr19:1107633:1174282:-:22904	SBNO2	GEXP	19	1107633	1174282	500000000	47	55.1	0.608	538
N:GEXP:DHX37:chr12:125431370:125473667:-:57647	DHX37	GEXP	12	125431370	125473667	N:GEXP:IQGAP3:chr1:156495197:156542396:-:128239	IQGAP3	GEXP	1	156495197	156542396	500000000	45.2	53.3	0.6	538
N:GEXP:DHX37:chr12:125431370:125473667:-:57647	DHX37	GEXP	12	125431370	125473667	N:GEXP:IRAK1:chrX:153275957:153285342:-:3654	IRAK1	GEXP	X	153275957	153285342	500000000	45.2	53.3	0.6	538
N:GEXP:DHX37:chr12:125431370:125473667:-:57647	DHX37	GEXP	12	125431370	125473667	N:GEXP:NFKBIL2:chr8:145654163:145669812:-:4796	NFKBIL2	GEXP	8	145654163	145669812	500000000	44.4	52.5	0.597	538
N:GEXP:DHX37:chr12:125431370:125473667:-:57647	DHX37	GEXP	12	125431370	125473667	N:GEXP:DPP9:chr19:4675244:4723855:-:91039	DPP9	GEXP	19	4675244	4723855	500000000	44.3	52.4	0.596	538
N:GEXP:DHX37:chr12:125431370:125473667:-:57647	DHX37	GEXP	12	125431370	125473667	N:GEXP:PLK1:chr16:23690201:23701688:+:5347	PLK1	GEXP	16	23690201	23701688	500000000	43.1	51.2	0.591	538
N:GEXP:DHX37:chr12:125431370:125473667:-:57647	DHX37	GEXP	12	125431370	125473667	N:GEXP:MYO9B:chr19:17186591:17324104:+:4650	MYO9B	GEXP	19	17186591	17324104	500000000	43	51.1	0.59	538
N:GEXP:DHX37:chr12:125431370:125473667:-:57647	DHX37	GEXP	12	125431370	125473667	N:GEXP:PKMYT1:chr16:3022792:3030540:-:9088	PKMYT1	GEXP	16	3022792	3030540	500000000	42.8	50.9	0.589	538
N:GEXP:DHX37:chr12:125431370:125473667:-:57647	DHX37	GEXP	12	125431370	125473667	N:GEXP:PUS1:chr12:132413745:132428406:+:80324	PUS1	GEXP	12	132413745	132428406	6982375	42.7	50.8	0.589	538
N:GEXP:DHX37:chr12:125431370:125473667:-:57647	DHX37	GEXP	12	125431370	125473667	N:GEXP:RHBDF2:chr17:74466975:74497509:-:79651	RHBDF2	GEXP	17	74466975	74497509	500000000	42.7	50.8	0.589	538
N:CNVR:12q24.33:chr12:132143000:133778000::	chr12:132,143,000-133,778,000 (2bp, 12q24.33)	CNVR	12	132143000	133778000	N:GEXP:DHX37:chr12:125431370:125473667:-:57647	DHX37	GEXP	12	125431370	125473667	6711630	31.6	39.4	0.531	532
N:CNVR:12q24.32:chr12:127005000:127633999::	chr12:127,005,000-127,633,999 (629Mb, 12q24.32)	CNVR	12	127005000	127633999	N:GEXP:DHX37:chr12:125431370:125473667:-:57647	DHX37	GEXP	12	125431370	125473667	1573630	31	38.8	0.528	532
N:GEXP:DHX37:chr12:125431370:125473667:-:57647	DHX37	GEXP	12	125431370	125473667	N:MIRN:HSA-MIR-21:chr17:57918627:57918698:+:	HSA-MIR-21	MIRN	17	57918627	57918698	500000000	30.4	37.6	0.526	520
N:CNVR:12q24:chr12:109858000:119987999::	chr12:109,858,000-119,987,999 (10bp, 12q24)	CNVR	12	109858000	119987999	N:GEXP:DHX37:chr12:125431370:125473667:-:57647	DHX37	GEXP	12	125431370	125473667	15573370	29.8	37.5	0.521	532
N:CNVR:TMEM132D:chr12:130004000:130144999::	chr12:130,004,000-130,144,999 (141Mb, TMEM132D)	CNVR	12	130004000	130144999	N:GEXP:DHX37:chr12:125431370:125473667:-:57647	DHX37	GEXP	12	125431370	125473667	4572630	29.7	37.5	0.52	532
N:CNVR:12q24.33:chr12:130147000:131731999::	chr12:130,147,000-131,731,999 (2bp, 12q24.33)	CNVR	12	130147000	131731999	N:GEXP:DHX37:chr12:125431370:125473667:-:57647	DHX37	GEXP	12	125431370	125473667	4715630	29.5	37.3	0.519	532
N:CNVR:12q24:chr12:119991000:126949999::	chr12:119,991,000-126,949,999 (7bp, 12q24)	CNVR	12	119991000	126949999	N:GEXP:DHX37:chr12:125431370:125473667:-:57647	DHX37	GEXP	12	125431370	125473667	5440370	29.5	37.3	0.519	532
N:CNVR:12q23.3:chr12:99804000:109854999::	chr12:99,804,000-109,854,999 (10bp, 12q23.3)	CNVR	12	99804000	109854999	N:GEXP:DHX37:chr12:125431370:125473667:-:57647	DHX37	GEXP	12	125431370	125473667	25627370	29.5	37.3	0.519	532
N:CNVR:LOC100128554:chr12:126951000:126993999::	chr12:126,951,000-126,993,999 (43Mb, LOC100128554)	CNVR	12	126951000	126993999	N:GEXP:DHX37:chr12:125431370:125473667:-:57647	DHX37	GEXP	12	125431370	125473667	1519630	29.4	37.2	0.518	532
N:CNVR:12q24.32:chr12:127634000:129229999::	chr12:127,634,000-129,229,999 (2bp, 12q24.32)	CNVR	12	127634000	129229999	N:GEXP:DHX37:chr12:125431370:125473667:-:57647	DHX37	GEXP	12	125431370	125473667	2202630	29.3	37.1	0.518	532
N:CNVR:12q24.3:chr12:129233000:130002999::	chr12:129,233,000-130,002,999 (770Mb, 12q24.3)	CNVR	12	129233000	130002999	N:GEXP:DHX37:chr12:125431370:125473667:-:57647	DHX37	GEXP	12	125431370	125473667	3801630	29	36.8	0.516	532
N:CNVR:12q24.33:chr12:132097000:132098999::	chr12:132,097,000-132,098,999 (2Mb, 12q24.33)	CNVR	12	132097000	132098999	N:GEXP:DHX37:chr12:125431370:125473667:-:57647	DHX37	GEXP	12	125431370	125473667	6665630	29	36.8	0.516	532
N:CNVR:12p13.31:chr12:8595000:9460999::	chr12:8,595,000-9,460,999 (866Mb, 12p13.31)	CNVR	12	8595000	9460999	N:GEXP:DHX37:chr12:125431370:125473667:-:57647	DHX37	GEXP	12	125431370	125473667	116836370	28.7	36.5	0.514	532
N:CNVR:12q23.1:chr12:97878000:99790999::	chr12:97,878,000-99,790,999 (2bp, 12q23.1)	CNVR	12	97878000	99790999	N:GEXP:DHX37:chr12:125431370:125473667:-:57647	DHX37	GEXP	12	125431370	125473667	27553370	28.1	35.9	0.51	532
N:CNVR:CPNE8:chr12:39133000:39172999::	chr12:39,133,000-39,172,999 (40Mb, CPNE8)	CNVR	12	39133000	39172999	N:GEXP:DHX37:chr12:125431370:125473667:-:57647	DHX37	GEXP	12	125431370	125473667	86298370	28.1	35.9	0.51	532
N:CNVR:MYO1H:chr12:109855000:109857999::	chr12:109,855,000-109,857,999 (3Mb, MYO1H)	CNVR	12	109855000	109857999	N:GEXP:DHX37:chr12:125431370:125473667:-:57647	DHX37	GEXP	12	125431370	125473667	15576370	28	35.8	0.51	532
N:CNVR:12q22:chr12:90493000:97877999::	chr12:90,493,000-97,877,999 (7bp, 12q22)	CNVR	12	90493000	97877999	N:GEXP:DHX37:chr12:125431370:125473667:-:57647	DHX37	GEXP	12	125431370	125473667	34938370	27.9	35.7	0.509	532
N:CNVR:12q12:chr12:39484000:43359999::	chr12:39,484,000-43,359,999 (4bp, 12q12)	CNVR	12	39484000	43359999	N:GEXP:DHX37:chr12:125431370:125473667:-:57647	DHX37	GEXP	12	125431370	125473667	85947370	27.4	35.2	0.506	532
N:CNVR:12q24.33:chr12:131776000:132096999::	chr12:131,776,000-132,096,999 (321Mb, 12q24.33)	CNVR	12	131776000	132096999	N:GEXP:DHX37:chr12:125431370:125473667:-:57647	DHX37	GEXP	12	125431370	125473667	6344630	27.2	35	0.505	532
N:CNVR:12q13.13:chr12:48726000:58729999::	chr12:48,726,000-58,729,999 (10bp, 12q13.13)	CNVR	12	48726000	58729999	N:GEXP:DHX37:chr12:125431370:125473667:-:57647	DHX37	GEXP	12	125431370	125473667	76705370	27.2	35	0.505	532
N:CNVR:12p13.3:chr12:4387000:8021999::	chr12:4,387,000-8,021,999 (4bp, 12p13.3)	CNVR	12	4387000	8021999	N:GEXP:DHX37:chr12:125431370:125473667:-:57647	DHX37	GEXP	12	125431370	125473667	121044370	27.2	35	0.505	532
N:CNVR:12q24.33:chr12:132099000:132119999::	chr12:132,099,000-132,119,999 (21Mb, 12q24.33)	CNVR	12	132099000	132119999	N:GEXP:DHX37:chr12:125431370:125473667:-:57647	DHX37	GEXP	12	125431370	125473667	6667630	27.2	35	0.505	532
N:CNVR:12q12:chr12:38015000:39126999::	chr12:38,015,000-39,126,999 (1bp, 12q12)	CNVR	12	38015000	39126999	N:GEXP:DHX37:chr12:125431370:125473667:-:57647	DHX37	GEXP	12	125431370	125473667	87416370	27	34.8	0.503	532
N:CNVR:12p13:chr12:9735000:11215999::	chr12:9,735,000-11,215,999 (1bp, 12p13)	CNVR	12	9735000	11215999	N:GEXP:DHX37:chr12:125431370:125473667:-:57647	DHX37	GEXP	12	125431370	125473667	115696370	26.9	34.7	0.502	532
N:CNVR:12p13.3:chr12:3090000:4384999::	chr12:3,090,000-4,384,999 (1bp, 12p13.3)	CNVR	12	3090000	4384999	N:GEXP:DHX37:chr12:125431370:125473667:-:57647	DHX37	GEXP	12	125431370	125473667	122341370	26.8	34.6	0.502	532
N:CNVR:CPNE8:chr12:39178000:39480999::	chr12:39,178,000-39,480,999 (303Mb, CPNE8)	CNVR	12	39178000	39480999	N:GEXP:DHX37:chr12:125431370:125473667:-:57647	DHX37	GEXP	12	125431370	125473667	86253370	26.8	34.6	0.502	532
N:CNVR:12q12:chr12:43360000:43419999::	chr12:43,360,000-43,419,999 (60Mb, 12q12)	CNVR	12	43360000	43419999	N:GEXP:DHX37:chr12:125431370:125473667:-:57647	DHX37	GEXP	12	125431370	125473667	82071370	26.8	34.6	0.502	532
N:CNVR:12q13.11:chr12:45913000:48724999::	chr12:45,913,000-48,724,999 (3bp, 12q13.11)	CNVR	12	45913000	48724999	N:GEXP:DHX37:chr12:125431370:125473667:-:57647	DHX37	GEXP	12	125431370	125473667	79518370	26.6	34.4	0.501	532
N:CNVR:12p13.33:chr12:2259000:3087999::	chr12:2,259,000-3,087,999 (829Mb, 12p13.33)	CNVR	12	2259000	3087999	N:GEXP:DHX37:chr12:125431370:125473667:-:57647	DHX37	GEXP	12	125431370	125473667	123172370	26.6	34.4	0.501	532
N:CNVR:12p13.33:chr12:875000:2244999::	chr12:875,000-2,244,999 (1bp, 12p13.33)	CNVR	12	875000	2244999	N:GEXP:DHX37:chr12:125431370:125473667:-:57647	DHX37	GEXP	12	125431370	125473667	124556370	26.5	34.3	0.5	532
N:CNVR:12p13.31:chr12:9468000:9630999::	chr12:9,468,000-9,630,999 (163Mb, 12p13.31)	CNVR	12	9468000	9630999	N:GEXP:DHX37:chr12:125431370:125473667:-:57647	DHX37	GEXP	12	125431370	125473667	115963370	26.4	34.2	0.499	532
N:CNVR:12q21.3:chr12:86882000:90490999::	chr12:86,882,000-90,490,999 (4bp, 12q21.3)	CNVR	12	86882000	90490999	N:GEXP:DHX37:chr12:125431370:125473667:-:57647	DHX37	GEXP	12	125431370	125473667	38549370	26.2	34	0.498	532
N:CNVR:12p11.1:chr12:33309000:33368999::	chr12:33,309,000-33,368,999 (60Mb, 12p11.1)	CNVR	12	33309000	33368999	N:GEXP:DHX37:chr12:125431370:125473667:-:57647	DHX37	GEXP	12	125431370	125473667	92122370	26.1	33.9	0.498	532
N:CNVR:12p11.1:chr12:33369000:33369999::	chr12:33,369,000-33,369,999 (100kb, 12p11.1)	CNVR	12	33369000	33369999	N:GEXP:DHX37:chr12:125431370:125473667:-:57647	DHX37	GEXP	12	125431370	125473667	92062370	26.1	33.9	0.498	532
N:CNVR:12q21.2:chr12:70879000:84162999::	chr12:70,879,000-84,162,999 (13bp, 12q21.2)	CNVR	12	70879000	84162999	N:GEXP:DHX37:chr12:125431370:125473667:-:57647	DHX37	GEXP	12	125431370	125473667	54552370	25.9	33.7	0.496	532
N:CNVR:12q15:chr12:64118000:70871999::	chr12:64,118,000-70,871,999 (7bp, 12q15)	CNVR	12	64118000	70871999	N:GEXP:DHX37:chr12:125431370:125473667:-:57647	DHX37	GEXP	12	125431370	125473667	61313370	25.9	33.7	0.496	532
N:CNVR:12p11.1:chr12:33370000:33385999::	chr12:33,370,000-33,385,999 (16Mb, 12p11.1)	CNVR	12	33370000	33385999	N:GEXP:DHX37:chr12:125431370:125473667:-:57647	DHX37	GEXP	12	125431370	125473667	92061370	26	33.7	0.497	532
N:CNVR:12q21.3:chr12:84166000:86880999::	chr12:84,166,000-86,880,999 (3bp, 12q21.3)	CNVR	12	84166000	86880999	N:GEXP:DHX37:chr12:125431370:125473667:-:57647	DHX37	GEXP	12	125431370	125473667	41265370	25.7	33.5	0.495	532
N:CNVR:12q12:chr12:43421000:45903999::	chr12:43,421,000-45,903,999 (2bp, 12q12)	CNVR	12	43421000	45903999	N:GEXP:DHX37:chr12:125431370:125473667:-:57647	DHX37	GEXP	12	125431370	125473667	82010370	25.7	33.5	0.495	532
N:CNVR:CPNE8:chr12:39173000:39177999::	chr12:39,173,000-39,177,999 (5Mb, CPNE8)	CNVR	12	39173000	39177999	N:GEXP:DHX37:chr12:125431370:125473667:-:57647	DHX37	GEXP	12	125431370	125473667	86258370	25.7	33.5	0.495	532
N:CNVR:12p11.1:chr12:33396000:34255999::	chr12:33,396,000-34,255,999 (860Mb, 12p11.1)	CNVR	12	33396000	34255999	N:GEXP:DHX37:chr12:125431370:125473667:-:57647	DHX37	GEXP	12	125431370	125473667	92035370	25.6	33.4	0.494	532
N:CNVR:12p13.33:chr12:150000:260999::	chr12:150,000-260,999 (111Mb, 12p13.33)	CNVR	12	150000	260999	N:GEXP:DHX37:chr12:125431370:125473667:-:57647	DHX37	GEXP	12	125431370	125473667	125281370	25.6	33.4	0.494	532
N:CNVR:12q14:chr12:58731000:63919999::	chr12:58,731,000-63,919,999 (5bp, 12q14)	CNVR	12	58731000	63919999	N:GEXP:DHX37:chr12:125431370:125473667:-:57647	DHX37	GEXP	12	125431370	125473667	66700370	25.3	33.1	0.492	532
N:CNVR:12p13.33:chr12:261000:868999::	chr12:261,000-868,999 (608Mb, 12p13.33)	CNVR	12	261000	868999	N:GEXP:DHX37:chr12:125431370:125473667:-:57647	DHX37	GEXP	12	125431370	125473667	125170370	25.2	33	0.492	532
N:CNVR:12p13.31:chr12:8124000:8361999::	chr12:8,124,000-8,361,999 (238Mb, 12p13.31)	CNVR	12	8124000	8361999	N:GEXP:DHX37:chr12:125431370:125473667:-:57647	DHX37	GEXP	12	125431370	125473667	117307370	25	32.8	0.49	532
N:CNVR:12p13.31:chr12:8024000:8123999::	chr12:8,024,000-8,123,999 (100Mb, 12p13.31)	CNVR	12	8024000	8123999	N:GEXP:DHX37:chr12:125431370:125473667:-:57647	DHX37	GEXP	12	125431370	125473667	117407370	24.9	32.7	0.49	532
N:CNVR:12q12:chr12:43420000:43420999::	chr12:43,420,000-43,420,999 (100kb, 12q12)	CNVR	12	43420000	43420999	N:GEXP:DHX37:chr12:125431370:125473667:-:57647	DHX37	GEXP	12	125431370	125473667	82011370	24.8	32.6	0.489	532
N:CNVR:CCND2:chr12:4385000:4386999::	chr12:4,385,000-4,386,999 (2Mb, CCND2)	CNVR	12	4385000	4386999	N:GEXP:DHX37:chr12:125431370:125473667:-:57647	DHX37	GEXP	12	125431370	125473667	121046370	24.8	32.6	0.489	532
N:CNVR:12p11.22:chr12:29165000:30238999::	chr12:29,165,000-30,238,999 (1bp, 12p11.22)	CNVR	12	29165000	30238999	N:GEXP:DHX37:chr12:125431370:125473667:-:57647	DHX37	GEXP	12	125431370	125473667	96266370	24.7	32.5	0.488	532
N:CNVR:12p11.21:chr12:31910000:33293999::	chr12:31,910,000-33,293,999 (1bp, 12p11.21)	CNVR	12	31910000	33293999	N:GEXP:DHX37:chr12:125431370:125473667:-:57647	DHX37	GEXP	12	125431370	125473667	93521370	24.7	32.5	0.488	532
N:CNVR:TEAD4:chr12:3088000:3089999::	chr12:3,088,000-3,089,999 (2Mb, TEAD4)	CNVR	12	3088000	3089999	N:GEXP:DHX37:chr12:125431370:125473667:-:57647	DHX37	GEXP	12	125431370	125473667	122343370	24.5	32.3	0.487	532
N:CNVR:12p12.1:chr12:22244000:27646999::	chr12:22,244,000-27,646,999 (5bp, 12p12.1)	CNVR	12	22244000	27646999	N:GEXP:DHX37:chr12:125431370:125473667:-:57647	DHX37	GEXP	12	125431370	125473667	103187370	24.3	32.1	0.486	532
N:CNVR:12p11.22:chr12:28098000:28676999::	chr12:28,098,000-28,676,999 (579Mb, 12p11.22)	CNVR	12	28098000	28676999	N:GEXP:DHX37:chr12:125431370:125473667:-:57647	DHX37	GEXP	12	125431370	125473667	97333370	24.2	32	0.485	532
N:CNVR:CCDC91:chr12:28677000:29162999::	chr12:28,677,000-29,162,999 (486Mb, CCDC91)	CNVR	12	28677000	29162999	N:GEXP:DHX37:chr12:125431370:125473667:-:57647	DHX37	GEXP	12	125431370	125473667	96754370	24.2	32	0.485	532
N:CNVR:12p13.1:chr12:12542000:16419999::	chr12:12,542,000-16,419,999 (4bp, 12p13.1)	CNVR	12	12542000	16419999	N:GEXP:DHX37:chr12:125431370:125473667:-:57647	DHX37	GEXP	12	125431370	125473667	112889370	24.2	32	0.485	532
N:CNVR:12p11.21:chr12:31408000:31907999::	chr12:31,408,000-31,907,999 (500Mb, 12p11.21)	CNVR	12	31408000	31907999	N:GEXP:DHX37:chr12:125431370:125473667:-:57647	DHX37	GEXP	12	125431370	125473667	94023370	24.1	31.9	0.484	532
N:CNVR:12q11:chr12:34256000:38011999::	chr12:34,256,000-38,011,999 (4bp, 12q11)	CNVR	12	34256000	38011999	N:GEXP:DHX37:chr12:125431370:125473667:-:57647	DHX37	GEXP	12	125431370	125473667	91175370	24.1	31.9	0.484	532
N:CNVR:12p11.2:chr12:30244000:31268999::	chr12:30,244,000-31,268,999 (1bp, 12p11.2)	CNVR	12	30244000	31268999	N:GEXP:DHX37:chr12:125431370:125473667:-:57647	DHX37	GEXP	12	125431370	125473667	95187370	24	31.8	0.484	532
N:CNVR:12p13.2:chr12:11544000:12535999::	chr12:11,544,000-12,535,999 (992Mb, 12p13.2)	CNVR	12	11544000	12535999	N:GEXP:DHX37:chr12:125431370:125473667:-:57647	DHX37	GEXP	12	125431370	125473667	113887370	24	31.8	0.483	532
N:CNVR:12q24.33:chr12:131775000:131775999::	chr12:131,775,000-131,775,999 (100kb, 12q24.33)	CNVR	12	131775000	131775999	N:GEXP:DHX37:chr12:125431370:125473667:-:57647	DHX37	GEXP	12	125431370	125473667	6343630	23.9	31.7	0.483	532
N:CNVR:12p13.2:chr12:11251000:11510999::	chr12:11,251,000-11,510,999 (260Mb, 12p13.2)	CNVR	12	11251000	11510999	N:GEXP:DHX37:chr12:125431370:125473667:-:57647	DHX37	GEXP	12	125431370	125473667	114180370	23.9	31.7	0.483	532
N:CNVR:12p12:chr12:16422000:20336999::	chr12:16,422,000-20,336,999 (4bp, 12p12)	CNVR	12	16422000	20336999	N:GEXP:DHX37:chr12:125431370:125473667:-:57647	DHX37	GEXP	12	125431370	125473667	109009370	23.8	31.6	0.482	532
N:CNVR:12p11.2:chr12:27652000:28093999::	chr12:27,652,000-28,093,999 (442Mb, 12p11.2)	CNVR	12	27652000	28093999	N:GEXP:DHX37:chr12:125431370:125473667:-:57647	DHX37	GEXP	12	125431370	125473667	97779370	23.8	31.6	0.482	532
N:CNVR:TMEM132D:chr12:130003000:130003999::	chr12:130,003,000-130,003,999 (100kb, TMEM132D)	CNVR	12	130003000	130003999	N:GEXP:DHX37:chr12:125431370:125473667:-:57647	DHX37	GEXP	12	125431370	125473667	4571630	23.5	31.3	0.48	532
N:CNVR:SLC2A14:chr12:8022000:8023999::	chr12:8,022,000-8,023,999 (2Mb, SLC2A14)	CNVR	12	8022000	8023999	N:GEXP:DHX37:chr12:125431370:125473667:-:57647	DHX37	GEXP	12	125431370	125473667	117409370	23.4	31.2	0.479	532
N:CNVR:TMEM132D:chr12:130145000:130146999::	chr12:130,145,000-130,146,999 (2Mb, TMEM132D)	CNVR	12	130145000	130146999	N:GEXP:DHX37:chr12:125431370:125473667:-:57647	DHX37	GEXP	12	125431370	125473667	4713630	23.1	30.9	0.477	532
N:GEXP:DHX37:chr12:125431370:125473667:-:57647	DHX37	GEXP	12	125431370	125473667	N:MIRN:HSA-MIR-10B:chr2:177015031:177015140:+:	HSA-MIR-10B	MIRN	2	177015031	177015140	500000000	23.7	30.9	-0.482	520
N:CNVR:12p12:chr12:20338000:22242999::	chr12:20,338,000-22,242,999 (2bp, 12p12)	CNVR	12	20338000	22242999	N:GEXP:DHX37:chr12:125431370:125473667:-:57647	DHX37	GEXP	12	125431370	125473667	105093370	23	30.8	0.476	532
N:CNVR:12q14.1:chr12:58730000:58730999::	chr12:58,730,000-58,730,999 (100kb, 12q14.1)	CNVR	12	58730000	58730999	N:GEXP:DHX37:chr12:125431370:125473667:-:57647	DHX37	GEXP	12	125431370	125473667	66701370	22.7	30.5	0.474	532
N:CNVR:12q14.2:chr12:63920000:63924999::	chr12:63,920,000-63,924,999 (5Mb, 12q14.2)	CNVR	12	63920000	63924999	N:GEXP:DHX37:chr12:125431370:125473667:-:57647	DHX37	GEXP	12	125431370	125473667	61511370	22.6	30.4	0.474	532
N:CNVR:12p12.2:chr12:20337000:20337999::	chr12:20,337,000-20,337,999 (100kb, 12p12.2)	CNVR	12	20337000	20337999	N:GEXP:DHX37:chr12:125431370:125473667:-:57647	DHX37	GEXP	12	125431370	125473667	105094370	22.2	30	0.471	532
N:CNVR:12q12:chr12:39481000:39483999::	chr12:39,481,000-39,483,999 (3Mb, 12q12)	CNVR	12	39481000	39483999	N:GEXP:DHX37:chr12:125431370:125473667:-:57647	DHX37	GEXP	12	125431370	125473667	85950370	21.8	29.6	0.468	532
N:CNVR:LOC100128554:chr12:126950000:126950999::	chr12:126,950,000-126,950,999 (100kb, LOC100128554)	CNVR	12	126950000	126950999	N:GEXP:DHX37:chr12:125431370:125473667:-:57647	DHX37	GEXP	12	125431370	125473667	1518630	21.6	29.4	0.466	532
N:CNVR:12p13.31:chr12:9734000:9734999::	chr12:9,734,000-9,734,999 (100kb, 12p13.31)	CNVR	12	9734000	9734999	N:GEXP:DHX37:chr12:125431370:125473667:-:57647	DHX37	GEXP	12	125431370	125473667	115697370	21.6	29.4	0.466	532
N:CNVR:12q24.33:chr12:131732000:131774999::	chr12:131,732,000-131,774,999 (43Mb, 12q24.33)	CNVR	12	131732000	131774999	N:GEXP:DHX37:chr12:125431370:125473667:-:57647	DHX37	GEXP	12	125431370	125473667	6300630	21.6	29.4	0.467	532
N:CNVR:12p11.1:chr12:33386000:33387999::	chr12:33,386,000-33,387,999 (2Mb, 12p11.1)	CNVR	12	33386000	33387999	N:GEXP:DHX37:chr12:125431370:125473667:-:57647	DHX37	GEXP	12	125431370	125473667	92045370	21.4	29.2	0.465	532
N:CNVR:12p13.31:chr12:8585000:8594999::	chr12:8,585,000-8,594,999 (10Mb, 12p13.31)	CNVR	12	8585000	8594999	N:GEXP:DHX37:chr12:125431370:125473667:-:57647	DHX37	GEXP	12	125431370	125473667	116846370	21.4	29.2	0.465	532
N:GEXP:DHX37:chr12:125431370:125473667:-:57647	DHX37	GEXP	12	125431370	125473667	N:MIRN:HSA-MIR-139:chr11:72326107:72326174:+:	HSA-MIR-139	MIRN	11	72326107	72326174	500000000	22	29.2	-0.47	520
N:CNVR:MGAT4C:chr12:86881000:86881999::	chr12:86,881,000-86,881,999 (100kb, MGAT4C)	CNVR	12	86881000	86881999	N:GEXP:DHX37:chr12:125431370:125473667:-:57647	DHX37	GEXP	12	125431370	125473667	38550370	21.2	29	0.464	532
N:CNVR:DPY19L2:chr12:63925000:64111999::	chr12:63,925,000-64,111,999 (187Mb, DPY19L2)	CNVR	12	63925000	64111999	N:GEXP:DHX37:chr12:125431370:125473667:-:57647	DHX37	GEXP	12	125431370	125473667	61506370	21	28.8	0.463	532
N:CNVR:12q24.32:chr12:126994000:127004999::	chr12:126,994,000-127,004,999 (11Mb, 12q24.32)	CNVR	12	126994000	127004999	N:GEXP:DHX37:chr12:125431370:125473667:-:57647	DHX37	GEXP	12	125431370	125473667	1562630	20.7	28.5	0.46	532
N:CNVR:ANKS1B:chr12:99791000:99794999::	chr12:99,791,000-99,794,999 (4Mb, ANKS1B)	CNVR	12	99791000	99794999	N:GEXP:DHX37:chr12:125431370:125473667:-:57647	DHX37	GEXP	12	125431370	125473667	25640370	20.4	28.2	0.458	532
N:CNVR:LOC642846:chr12:9461000:9467999::	chr12:9,461,000-9,467,999 (7Mb, LOC642846)	CNVR	12	9461000	9467999	N:GEXP:DHX37:chr12:125431370:125473667:-:57647	DHX37	GEXP	12	125431370	125473667	115970370	20.2	28	0.456	532
N:CNVR:12p11.22:chr12:28094000:28094999::	chr12:28,094,000-28,094,999 (100kb, 12p11.22)	CNVR	12	28094000	28094999	N:GEXP:DHX37:chr12:125431370:125473667:-:57647	DHX37	GEXP	12	125431370	125473667	97337370	19.9	27.7	0.454	532
N:CNVR:12q24.33:chr12:132142000:132142999::	chr12:132,142,000-132,142,999 (100kb, 12q24.33)	CNVR	12	132142000	132142999	N:GEXP:DHX37:chr12:125431370:125473667:-:57647	DHX37	GEXP	12	125431370	125473667	6710630	19.6	27.4	0.452	532
N:CNVR:12q:chr12:35400000:132349534::GisticArm_r	12q (Gistic Arm)	CNVR	12	35400000	132349534	N:GEXP:DHX37:chr12:125431370:125473667:-:57647	DHX37	GEXP	12	125431370	125473667	90031370	19.6	27.4	0.453	529
N:GEXP:DHX37:chr12:125431370:125473667:-:57647	DHX37	GEXP	12	125431370	125473667	N:MIRN:HSA-MIR-155:chr21:26946292:26946356:+:	HSA-MIR-155	MIRN	21	26946292	26946356	500000000	20.1	27.3	0.456	520
N:CNVR:C12ORF70:chr12:27647000:27651999::	chr12:27,647,000-27,651,999 (5Mb, C12ORF70)	CNVR	12	27647000	27651999	N:GEXP:DHX37:chr12:125431370:125473667:-:57647	DHX37	GEXP	12	125431370	125473667	97784370	19.1	26.9	0.448	532
N:CNVR:12p:chr12:0:35400000::GisticArm_r	12p (Gistic Arm)	CNVR	12	0	35400000	N:GEXP:DHX37:chr12:125431370:125473667:-:57647	DHX37	GEXP	12	125431370	125473667	125431370	18.9	26.7	0.448	529
N:GEXP:DHX37:chr12:125431370:125473667:-:57647	DHX37	GEXP	12	125431370	125473667	N:MIRN:HSA-MIR-15B:chr3:160122376:160122473:+:	HSA-MIR-15B	MIRN	3	160122376	160122473	500000000	19.3	26.5	0.449	520
N:CNVR:ANKS1B:chr12:99799000:99803999::	chr12:99,799,000-99,803,999 (5Mb, ANKS1B)	CNVR	12	99799000	99803999	N:GEXP:DHX37:chr12:125431370:125473667:-:57647	DHX37	GEXP	12	125431370	125473667	25632370	18.7	26.5	0.445	532
N:CNVR:12q24.32:chr12:129230000:129232999::	chr12:129,230,000-129,232,999 (3Mb, 12q24.32)	CNVR	12	129230000	129232999	N:GEXP:DHX37:chr12:125431370:125473667:-:57647	DHX37	GEXP	12	125431370	125473667	3798630	18.7	26.5	0.445	532
N:CNVR:CPNE8:chr12:39127000:39132999::	chr12:39,127,000-39,132,999 (6Mb, CPNE8)	CNVR	12	39127000	39132999	N:GEXP:DHX37:chr12:125431370:125473667:-:57647	DHX37	GEXP	12	125431370	125473667	86304370	18.6	26.4	0.444	532
N:CNVR:HSA-MIR-3194-3P:chr12:31373000:31407999::	chr12:31,373,000-31,407,999 (35Mb, HSA-MIR-3194-3P)	CNVR	12	31373000	31407999	N:GEXP:DHX37:chr12:125431370:125473667:-:57647	DHX37	GEXP	12	125431370	125473667	94058370	18.6	26.4	0.444	532
N:CNVR:12p11.22:chr12:29163000:29164999::	chr12:29,163,000-29,164,999 (2Mb, 12p11.22)	CNVR	12	29163000	29164999	N:GEXP:DHX37:chr12:125431370:125473667:-:57647	DHX37	GEXP	12	125431370	125473667	96268370	18.6	26.4	0.444	532
N:CNVR:OVOS2:chr12:31269000:31372999::	chr12:31,269,000-31,372,999 (104Mb, OVOS2)	CNVR	12	31269000	31372999	N:GEXP:DHX37:chr12:125431370:125473667:-:57647	DHX37	GEXP	12	125431370	125473667	94162370	18.4	26.2	0.443	532
N:GEXP:DHX37:chr12:125431370:125473667:-:57647	DHX37	GEXP	12	125431370	125473667	N:MIRN:HSA-MIR-106B:chr7:99691616:99691697:+:	HSA-MIR-106B	MIRN	7	99691616	99691697	500000000	18.9	26.1	0.447	520
N:GEXP:DHX37:chr12:125431370:125473667:-:57647	DHX37	GEXP	12	125431370	125473667	N:METH:CCDC105:chr19:15121531:::cg02489552	CCDC105 cg02489552	METH	19	15121531		500000000	17.4	26	0.456	492
N:CNVR:12q12:chr12:45910000:45912999::	chr12:45,910,000-45,912,999 (3Mb, 12q12)	CNVR	12	45910000	45912999	N:GEXP:DHX37:chr12:125431370:125473667:-:57647	DHX37	GEXP	12	125431370	125473667	79521370	18.1	25.9	0.508	386
N:CNVR:12p13.2:chr12:11216000:11219999::	chr12:11,216,000-11,219,999 (4Mb, 12p13.2)	CNVR	12	11216000	11219999	N:GEXP:DHX37:chr12:125431370:125473667:-:57647	DHX37	GEXP	12	125431370	125473667	114215370	17.9	25.7	0.439	532
N:CNVR:12p11.1:chr12:33308000:33308999::	chr12:33,308,000-33,308,999 (100kb, 12p11.1)	CNVR	12	33308000	33308999	N:GEXP:DHX37:chr12:125431370:125473667:-:57647	DHX37	GEXP	12	125431370	125473667	92123370	17.9	25.6	0.438	532
N:GEXP:DHX37:chr12:125431370:125473667:-:57647	DHX37	GEXP	12	125431370	125473667	N:METH:IRF7:chr11:617140:::cg00645579	IRF7 cg00645579	METH	11	617140		500000000	17	25.5	-0.453	492
N:CNVR:LOH12CR1:chr12:12536000:12541999::	chr12:12,536,000-12,541,999 (6Mb, LOH12CR1)	CNVR	12	12536000	12541999	N:GEXP:DHX37:chr12:125431370:125473667:-:57647	DHX37	GEXP	12	125431370	125473667	112895370	17.5	25.3	0.436	532
N:CNVR:12q14.2:chr12:64112000:64117999::	chr12:64,112,000-64,117,999 (6Mb, 12q14.2)	CNVR	12	64112000	64117999	N:GEXP:DHX37:chr12:125431370:125473667:-:57647	DHX37	GEXP	12	125431370	125473667	61319370	17.5	25.3	0.436	532
N:GEXP:DHX37:chr12:125431370:125473667:-:57647	DHX37	GEXP	12	125431370	125473667	C:SAMP:sampleType:::::	Sample Type	SAMP				500000000	19.8	25.2	0.433	538
N:CNVR:12q24.33:chr12:132120000:132131999::	chr12:132,120,000-132,131,999 (12Mb, 12q24.33)	CNVR	12	132120000	132131999	N:GEXP:DHX37:chr12:125431370:125473667:-:57647	DHX37	GEXP	12	125431370	125473667	6688630	17.3	25.1	0.433	532
N:CNVR:AF086288:chr12:119988000:119990999::	chr12:119,988,000-119,990,999 (3Mb, AF086288)	CNVR	12	119988000	119990999	N:GEXP:DHX37:chr12:125431370:125473667:-:57647	DHX37	GEXP	12	125431370	125473667	5443370	17.3	25.1	0.434	532
N:CNVR:12p11.22:chr12:28095000:28097999::	chr12:28,095,000-28,097,999 (3Mb, 12p11.22)	CNVR	12	28095000	28097999	N:GEXP:DHX37:chr12:125431370:125473667:-:57647	DHX37	GEXP	12	125431370	125473667	97336370	17.2	25	0.433	532
N:CNVR:12p12.1:chr12:22243000:22243999::	chr12:22,243,000-22,243,999 (100kb, 12p12.1)	CNVR	12	22243000	22243999	N:GEXP:DHX37:chr12:125431370:125473667:-:57647	DHX37	GEXP	12	125431370	125473667	103188370	17.1	24.9	0.432	532
N:CNVR:12p13.31:chr12:9729000:9733999::	chr12:9,729,000-9,733,999 (5Mb, 12p13.31)	CNVR	12	9729000	9733999	N:GEXP:DHX37:chr12:125431370:125473667:-:57647	DHX37	GEXP	12	125431370	125473667	115702370	16.8	24.6	0.488	401
N:CNVR:CACNA1C:chr12:2258000:2258999::	chr12:2,258,000-2,258,999 (100kb, CACNA1C)	CNVR	12	2258000	2258999	N:GEXP:DHX37:chr12:125431370:125473667:-:57647	DHX37	GEXP	12	125431370	125473667	123173370	16.8	24.6	0.429	532
N:CNVR:12p13.31:chr12:9631000:9632999::	chr12:9,631,000-9,632,999 (2Mb, 12p13.31)	CNVR	12	9631000	9632999	N:GEXP:DHX37:chr12:125431370:125473667:-:57647	DHX37	GEXP	12	125431370	125473667	115800370	16.4	24.2	0.485	400
N:GEXP:DHX37:chr12:125431370:125473667:-:57647	DHX37	GEXP	12	125431370	125473667	N:METH:DISP1:chr1:223101848:::cg10942056	DISP1 cg10942056	METH	1	223101848		500000000	15.6	24.1	0.441	492
N:GEXP:DHX37:chr12:125431370:125473667:-:57647	DHX37	GEXP	12	125431370	125473667	N:MIRN:HSA-MIR-625:chr14:65937820:65937904:+:	HSA-MIR-625	MIRN	14	65937820	65937904	500000000	16.5	23.7	0.426	520
N:GEXP:DHX37:chr12:125431370:125473667:-:57647	DHX37	GEXP	12	125431370	125473667	N:METH:SLC26A11:chr17:78194695:::cg24838010	SLC26A11 cg24838010	METH	17	78194695		500000000	15	23.5	0.435	492
N:CNVR:12p11:chr12:33294000:33300999::	chr12:33,294,000-33,300,999 (7Mb, 12p11)	CNVR	12	33294000	33300999	N:GEXP:DHX37:chr12:125431370:125473667:-:57647	DHX37	GEXP	12	125431370	125473667	92137370	15.1	22.9	0.416	532
N:CNVR:12q24.33:chr12:132134000:132141999::	chr12:132,134,000-132,141,999 (8Mb, 12q24.33)	CNVR	12	132134000	132141999	N:GEXP:DHX37:chr12:125431370:125473667:-:57647	DHX37	GEXP	12	125431370	125473667	6702630	14.9	22.7	0.448	447
N:GEXP:DHX37:chr12:125431370:125473667:-:57647	DHX37	GEXP	12	125431370	125473667	N:METH:TM4SF19:chr3:196065569:::cg05445326	TM4SF19 cg05445326	METH	3	196065569		500000000	13.9	22.4	-0.426	492
N:GEXP:DHX37:chr12:125431370:125473667:-:57647	DHX37	GEXP	12	125431370	125473667	N:METH:PLEK:chr2:68592375:::cg04872689	PLEK cg04872689	METH	2	68592375		500000000	13.6	22.2	-0.424	492
N:GEXP:DHX37:chr12:125431370:125473667:-:57647	DHX37	GEXP	12	125431370	125473667	N:METH:PTPN22:chr1:114414312:::cg00916635	PTPN22 cg00916635	METH	1	114414312		500000000	13.7	22.2	-0.424	492
N:GEXP:DHX37:chr12:125431370:125473667:-:57647	DHX37	GEXP	12	125431370	125473667	B:SAMP:I(C2|mRNAseq_CNMF_3):::::	mRNAseq_CNMF_3 C2	SAMP				500000000	15.9	22.1	0.432	469
N:GEXP:DHX37:chr12:125431370:125473667:-:57647	DHX37	GEXP	12	125431370	125473667	N:MIRN:HSA-MIR-10A:chr17:46657200:46657309:+:	HSA-MIR-10A	MIRN	17	46657200	46657309	500000000	14.8	22	-0.412	520
N:GEXP:DHX37:chr12:125431370:125473667:-:57647	DHX37	GEXP	12	125431370	125473667	N:MIRN:HSA-MIR-142:chr17:56408593:56408679:+:	HSA-MIR-142	MIRN	17	56408593	56408679	500000000	14.7	21.9	0.411	520
N:CNVR:SLC15A5:chr12:16420000:16421999::	chr12:16,420,000-16,421,999 (2Mb, SLC15A5)	CNVR	12	16420000	16421999	N:GEXP:DHX37:chr12:125431370:125473667:-:57647	DHX37	GEXP	12	125431370	125473667	109011370	14	21.8	0.406	532
N:GEXP:DHX37:chr12:125431370:125473667:-:57647	DHX37	GEXP	12	125431370	125473667	N:METH:TMEM132D:chr12:130389138:::cg13234863	TMEM132D cg13234863	METH	12	130389138		4957768	13.2	21.7	0.437	450
N:GEXP:DHX37:chr12:125431370:125473667:-:57647	DHX37	GEXP	12	125431370	125473667	N:MIRN:HSA-MIR-934:chrX:135633037:135633119:+:	HSA-MIR-934	MIRN	X	135633037	135633119	500000000	14.2	21.4	-0.406	520
N:GEXP:DHX37:chr12:125431370:125473667:-:57647	DHX37	GEXP	12	125431370	125473667	B:SAMP:I(C3|mRNAseq_CC_3):::::	mRNAseq_CC_3 C3	SAMP				500000000	15.1	21.3	0.425	469
N:GEXP:DHX37:chr12:125431370:125473667:-:57647	DHX37	GEXP	12	125431370	125473667	N:METH:PTPN22:chr1:114414340:::cg14385738	PTPN22 cg14385738	METH	1	114414340		500000000	12.7	21.2	-0.415	492
N:CNVR:12q21.31:chr12:84163000:84165999::	chr12:84,163,000-84,165,999 (3Mb, 12q21.31)	CNVR	12	84163000	84165999	N:GEXP:DHX37:chr12:125431370:125473667:-:57647	DHX37	GEXP	12	125431370	125473667	41268370	13.5	21.2	0.401	532
N:CNVR:12q11:chr12:38012000:38014999::	chr12:38,012,000-38,014,999 (3Mb, 12q11)	CNVR	12	38012000	38014999	N:GEXP:DHX37:chr12:125431370:125473667:-:57647	DHX37	GEXP	12	125431370	125473667	87419370	13.3	21	0.399	532
N:GEXP:DHX37:chr12:125431370:125473667:-:57647	DHX37	GEXP	12	125431370	125473667	N:MIRN:HSA-MIR-146B:chr10:104196269:104196341:+:	HSA-MIR-146B	MIRN	10	104196269	104196341	500000000	13.7	20.9	0.402	520
N:GEXP:DHX37:chr12:125431370:125473667:-:57647	DHX37	GEXP	12	125431370	125473667	C:SAMP:mRNAseq_CNMF_3:::::	mRNAseq_CNMF_3	SAMP				500000000	15.5	20.9	0.117	469
N:CNVR:12p11.1:chr12:33388000:33395999::	chr12:33,388,000-33,395,999 (8Mb, 12p11.1)	CNVR	12	33388000	33395999	N:GEXP:DHX37:chr12:125431370:125473667:-:57647	DHX37	GEXP	12	125431370	125473667	92043370	13	20.8	0.397	532
N:GEXP:DHX37:chr12:125431370:125473667:-:57647	DHX37	GEXP	12	125431370	125473667	N:METH:ZNF577:chr19:52391250:::cg16731240	ZNF577 cg16731240	METH	19	52391250		500000000	12.2	20.7	0.41	492
N:GEXP:DHX37:chr12:125431370:125473667:-:57647	DHX37	GEXP	12	125431370	125473667	N:MIRN:HSA-MIR-28:chr3:188406569:188406654:+:	HSA-MIR-28	MIRN	3	188406569	188406654	500000000	13.3	20.5	0.399	520
N:GEXP:DHX37:chr12:125431370:125473667:-:57647	DHX37	GEXP	12	125431370	125473667	N:MIRN:HSA-MIR-130B:chr22:22007593:22007674:+:	HSA-MIR-130B	MIRN	22	22007593	22007674	500000000	13.2	20.4	0.397	520
N:GEXP:DHX37:chr12:125431370:125473667:-:57647	DHX37	GEXP	12	125431370	125473667	N:METH:BCL2:chr18:60904328:::cg25059899	BCL2 cg25059899	METH	18	60904328		500000000	11.9	20.4	-0.408	492
N:GEXP:DHX37:chr12:125431370:125473667:-:57647	DHX37	GEXP	12	125431370	125473667	N:METH:C3:chr19:6719980:::cg04089739	C3 cg04089739	METH	19	6719980		500000000	11.8	20.3	-0.408	487
N:CNVR:12p13.2:chr12:11242000:11250999::	chr12:11,242,000-11,250,999 (9Mb, 12p13.2)	CNVR	12	11242000	11250999	N:GEXP:DHX37:chr12:125431370:125473667:-:57647	DHX37	GEXP	12	125431370	125473667	114189370	12.4	20.2	0.457	377
N:GEXP:DHX37:chr12:125431370:125473667:-:57647	DHX37	GEXP	12	125431370	125473667	N:MIRN:HSA-MIR-193A:chr17:29887015:29887102:+:	HSA-MIR-193A	MIRN	17	29887015	29887102	500000000	13	20.2	0.395	520
N:GEXP:DHX37:chr12:125431370:125473667:-:57647	DHX37	GEXP	12	125431370	125473667	C:SAMP:mRNAseq_CC_3:::::	mRNAseq_CC_3	SAMP				500000000	14.8	20.2	0.393	469
N:CNVR:CACNA1C:chr12:2245000:2257999::	chr12:2,245,000-2,257,999 (13Mb, CACNA1C)	CNVR	12	2245000	2257999	N:GEXP:DHX37:chr12:125431370:125473667:-:57647	DHX37	GEXP	12	125431370	125473667	123186370	12.2	20	0.39	532
N:GEXP:DHX37:chr12:125431370:125473667:-:57647	DHX37	GEXP	12	125431370	125473667	N:METH:SLCO2B1:chr11:74860985:::cg18589858	SLCO2B1 cg18589858	METH	11	74860985		500000000	11.4	19.9	-0.403	492
N:CNVR:LOC389634:chr12:8450000:8557999::	chr12:8,450,000-8,557,999 (108Mb, LOC389634)	CNVR	12	8450000	8557999	N:GEXP:DHX37:chr12:125431370:125473667:-:57647	DHX37	GEXP	12	125431370	125473667	116981370	12.1	19.9	0.388	532
N:GEXP:DHX37:chr12:125431370:125473667:-:57647	DHX37	GEXP	12	125431370	125473667	B:SAMP:I(C2,C3|mRNAseq_CC_3):::::	mRNAseq_CC_3 C2 vs C3	SAMP				500000000	13.7	19.9	0.435	417
N:GEXP:DHX37:chr12:125431370:125473667:-:57647	DHX37	GEXP	12	125431370	125473667	N:MIRN:HSA-MIR-1293:chr12:50627925:50627995:+:	HSA-MIR-1293	MIRN	12	50627925	50627995	74803445	12.6	19.8	0.392	520
N:CNVR:BC031864:chr12:70872000:70875999::	chr12:70,872,000-70,875,999 (4Mb, BC031864)	CNVR	12	70872000	70875999	N:GEXP:DHX37:chr12:125431370:125473667:-:57647	DHX37	GEXP	12	125431370	125473667	54559370	12	19.8	0.388	532
N:CNVR:12p11.21:chr12:31908000:31909999::	chr12:31,908,000-31,909,999 (2Mb, 12p11.21)	CNVR	12	31908000	31909999	N:GEXP:DHX37:chr12:125431370:125473667:-:57647	DHX37	GEXP	12	125431370	125473667	93523370	11.9	19.7	0.387	532
N:GEXP:DHX37:chr12:125431370:125473667:-:57647	DHX37	GEXP	12	125431370	125473667	N:METH:IL1F9:chr2:113735377:::cg08861115	IL1F9 cg08861115	METH	2	113735377		500000000	11.1	19.6	-0.4	492
N:GEXP:DHX37:chr12:125431370:125473667:-:57647	DHX37	GEXP	12	125431370	125473667	N:METH:NF1:chr17:29648811:::cg23352695	NF1 cg23352695	METH	17	29648811		500000000	11	19.5	-0.399	492
N:GEXP:DHX37:chr12:125431370:125473667:-:57647	DHX37	GEXP	12	125431370	125473667	N:METH:CCT6A:chr7:56118238:::cg23839680	CCT6A cg23839680	METH	7	56118238		500000000	10.9	19.4	-0.398	492
N:GEXP:DHX37:chr12:125431370:125473667:-:57647	DHX37	GEXP	12	125431370	125473667	N:METH:PPAP2B:chr1:57045708:::cg16505550	PPAP2B cg16505550	METH	1	57045708		500000000	10.9	19.4	0.398	492
N:CNVR:BC031864:chr12:70876000:70877999::	chr12:70,876,000-70,877,999 (2Mb, BC031864)	CNVR	12	70876000	70877999	N:GEXP:DHX37:chr12:125431370:125473667:-:57647	DHX37	GEXP	12	125431370	125473667	54555370	11.6	19.4	0.384	532
N:CNVR:BC031864:chr12:70878000:70878999::	chr12:70,878,000-70,878,999 (100kb, BC031864)	CNVR	12	70878000	70878999	N:GEXP:DHX37:chr12:125431370:125473667:-:57647	DHX37	GEXP	12	125431370	125473667	54553370	11.5	19.3	0.383	532
N:GEXP:DHX37:chr12:125431370:125473667:-:57647	DHX37	GEXP	12	125431370	125473667	N:METH:AK1:chr9:130640212:::cg11714502	AK1 cg11714502	METH	9	130640212		500000000	10.8	19.3	0.397	492
N:GEXP:DHX37:chr12:125431370:125473667:-:57647	DHX37	GEXP	12	125431370	125473667	B:SAMP:I(C1,C2|mRNAseq_CNMF_3):::::	mRNAseq_CNMF_3 C1 vs C2	SAMP				500000000	13.1	19.3	0.453	369
N:GEXP:DHX37:chr12:125431370:125473667:-:57647	DHX37	GEXP	12	125431370	125473667	N:METH:TRIM14:chr9:100882376:::cg01618660	TRIM14 cg01618660	METH	9	100882376		500000000	10.7	19.2	-0.396	492
N:GEXP:DHX37:chr12:125431370:125473667:-:57647	DHX37	GEXP	12	125431370	125473667	N:METH:C1orf161:chr1:116654415:::cg09440340	C1orf161 cg09440340	METH	1	116654415		500000000	10.7	19.2	0.396	492
N:GEXP:DHX37:chr12:125431370:125473667:-:57647	DHX37	GEXP	12	125431370	125473667	N:METH:FERMT3:chr11:63973006:::cg14654385	FERMT3 cg14654385	METH	11	63973006		500000000	10.6	19.1	-0.395	492
N:GEXP:DHX37:chr12:125431370:125473667:-:57647	DHX37	GEXP	12	125431370	125473667	N:METH:CEBPE:chr14:23589419:::cg15691199	CEBPE cg15691199	METH	14	23589419		500000000	10.6	19.1	-0.395	492
N:GEXP:DHX37:chr12:125431370:125473667:-:57647	DHX37	GEXP	12	125431370	125473667	N:MIRN:HSA-MIR-204:chr9:73424891:73425000:+:	HSA-MIR-204	MIRN	9	73424891	73425000	500000000	11.5	18.7	-0.381	520
N:CNVR:20q13:chr20:52682000:58072999::	chr20:52,682,000-58,072,999 (5bp, 20q13)	CNVR	20	52682000	58072999	N:GEXP:DHX37:chr12:125431370:125473667:-:57647	DHX37	GEXP	12	125431370	125473667	500000000	10.9	18.7	0.377	532
N:CNVR:12q13.11:chr12:48725000:48725999::	chr12:48,725,000-48,725,999 (100kb, 12q13.11)	CNVR	12	48725000	48725999	N:GEXP:DHX37:chr12:125431370:125473667:-:57647	DHX37	GEXP	12	125431370	125473667	76706370	10.7	18.5	0.375	532
N:CNVR:20q13.12:chr20:37697000:48790999::	chr20:37,697,000-48,790,999 (11bp, 20q13.12)	CNVR	20	37697000	48790999	N:GEXP:DHX37:chr12:125431370:125473667:-:57647	DHX37	GEXP	12	125431370	125473667	500000000	10.6	18.4	0.374	532
N:CNVR:12p:chr12:0:35400000::GisticArm_d	12p (Gistic Arm)	CNVR	12	0	35400000	N:GEXP:DHX37:chr12:125431370:125473667:-:57647	DHX37	GEXP	12	125431370	125473667	125431370	10.6	18.4	0.375	529
N:CNVR:20q13:chr20:48798000:52646999::	chr20:48,798,000-52,646,999 (4bp, 20q13)	CNVR	20	48798000	52646999	N:GEXP:DHX37:chr12:125431370:125473667:-:57647	DHX37	GEXP	12	125431370	125473667	500000000	10.5	18.3	0.374	532
N:CNVR:20q13.33:chr20:60560000:62870999::	chr20:60,560,000-62,870,999 (2bp, 20q13.33)	CNVR	20	60560000	62870999	N:GEXP:DHX37:chr12:125431370:125473667:-:57647	DHX37	GEXP	12	125431370	125473667	500000000	10.5	18.3	0.373	532
N:CNVR:20q13.13:chr20:48793000:48796999::	chr20:48,793,000-48,796,999 (4Mb, 20q13.13)	CNVR	20	48793000	48796999	N:GEXP:DHX37:chr12:125431370:125473667:-:57647	DHX37	GEXP	12	125431370	125473667	500000000	10.5	18.3	0.373	532
N:CNVR:20q13.33:chr20:59591000:60558999::	chr20:59,591,000-60,558,999 (968Mb, 20q13.33)	CNVR	20	59591000	60558999	N:GEXP:DHX37:chr12:125431370:125473667:-:57647	DHX37	GEXP	12	125431370	125473667	500000000	10.3	18.1	0.371	532
N:CNVR:20q13.3:chr20:58078000:59308999::	chr20:58,078,000-59,308,999 (1bp, 20q13.3)	CNVR	20	58078000	59308999	N:GEXP:DHX37:chr12:125431370:125473667:-:57647	DHX37	GEXP	12	125431370	125473667	500000000	10.3	18.1	0.371	532
N:GEXP:DHX37:chr12:125431370:125473667:-:57647	DHX37	GEXP	12	125431370	125473667	N:MIRN:HSA-MIR-3677:chr16:2320714:2320773:+:	HSA-MIR-3677	MIRN	16	2320714	2320773	500000000	10.8	18	0.374	520
N:GEXP:DHX37:chr12:125431370:125473667:-:57647	DHX37	GEXP	12	125431370	125473667	N:MIRN:HSA-MIR-331:chr12:95702196:95702289:+:	HSA-MIR-331	MIRN	12	95702196	95702289	29729174	10.8	18	0.374	520
N:GEXP:DHX37:chr12:125431370:125473667:-:57647	DHX37	GEXP	12	125431370	125473667	N:RPPA:DIABLO:chr12:122692209:122712068:-:Smac-M-V	DIABLO	RPPA	12	122692209	122712068	2739161	11.5	17.9	0.41	425
N:GEXP:DHX37:chr12:125431370:125473667:-:57647	DHX37	GEXP	12	125431370	125473667	N:MIRN:HSA-MIR-24-1:chr9:97848303:97848370:+:	HSA-MIR-24-1	MIRN	9	97848303	97848370	500000000	10.7	17.9	-0.373	520
Table9.HNSC
id_a	pretty_label_a	datatype_a	chr_a	start_a	end_a	id_b	pretty_label_b	datatype_b	chr_b	start_b	end_b	link_distance	adj_logged_pvalue	logged_pvalue	correlation	num_nonna
N:GEXP:DDX54:chr12:113594978:113623284:-:79039	DDX54	GEXP	12	113594978	113623284	N:GEXP:DHX37:chr12:125431370:125473667:-:57647	DHX37	GEXP	12	125431370	125473667	11808086	27.1	35.2	0.635	303
N:GEXP:DHX37:chr12:125431370:125473667:-:57647	DHX37	GEXP	12	125431370	125473667	N:GEXP:UTP20:chr12:101673905:101780397:+:27340	UTP20	GEXP	12	101673905	101780397	23650973	26.2	34.3	0.629	303
N:GEXP:DHX37:chr12:125431370:125473667:-:57647	DHX37	GEXP	12	125431370	125473667	N:GEXP:MYBBP1A:chr17:4442191:4458681:-:10514	MYBBP1A	GEXP	17	4442191	4458681	500000000	19.1	27.2	0.571	303
N:GEXP:DHX37:chr12:125431370:125473667:-:57647	DHX37	GEXP	12	125431370	125473667	N:GEXP:PDCD11:chr10:105156412:105206019:+:22984	PDCD11	GEXP	10	105156412	105206019	500000000	17.2	25.3	0.554	303
N:GEXP:DHX37:chr12:125431370:125473667:-:57647	DHX37	GEXP	12	125431370	125473667	N:GEXP:PGAM5:chr12:133264635:133299323:+:192111	PGAM5	GEXP	12	133264635	133299323	7790968	17.2	25.3	0.554	303
N:GEXP:DHX37:chr12:125431370:125473667:-:57647	DHX37	GEXP	12	125431370	125473667	N:GEXP:GCN1L1:chr12:120565014:120632513:-:10985	GCN1L1	GEXP	12	120565014	120632513	4798857	16.7	24.8	0.549	303
N:GEXP:DHX37:chr12:125431370:125473667:-:57647	DHX37	GEXP	12	125431370	125473667	N:GEXP:PUS1:chr12:132413745:132428406:+:80324	PUS1	GEXP	12	132413745	132428406	6940078	16.3	24.3	0.544	303
N:GEXP:CAD:chr2:27440258:27466654:+:790	CAD	GEXP	2	27440258	27466654	N:GEXP:DHX37:chr12:125431370:125473667:-:57647	DHX37	GEXP	12	125431370	125473667	500000000	15.2	23.2	0.533	303
N:GEXP:DHX37:chr12:125431370:125473667:-:57647	DHX37	GEXP	12	125431370	125473667	N:GEXP:EFTUD2:chr17:42927655:42976993:-:9343	EFTUD2	GEXP	17	42927655	42976993	500000000	15	23.1	0.532	303
N:GEXP:DHX37:chr12:125431370:125473667:-:57647	DHX37	GEXP	12	125431370	125473667	N:GEXP:RRP12:chr10:99116458:99161127:-:23223	RRP12	GEXP	10	99116458	99161127	500000000	14.6	22.6	0.527	303
N:GEXP:C10ORF2:chr10:102747293:102754158:+:56652	C10ORF2	GEXP	10	102747293	102754158	N:GEXP:DHX37:chr12:125431370:125473667:-:57647	DHX37	GEXP	12	125431370	125473667	500000000	14.3	22.4	0.524	303
N:GEXP:DHX37:chr12:125431370:125473667:-:57647	DHX37	GEXP	12	125431370	125473667	N:GEXP:DPH2:chr1:44435653:44439043:+:1802	DPH2	GEXP	1	44435653	44439043	500000000	14.3	22.3	0.524	303
N:GEXP:DHX37:chr12:125431370:125473667:-:57647	DHX37	GEXP	12	125431370	125473667	N:GEXP:PFAS:chr17:8152596:8173809:+:5198	PFAS	GEXP	17	8152596	8173809	500000000	13.7	21.7	0.518	303
N:GEXP:DHX37:chr12:125431370:125473667:-:57647	DHX37	GEXP	12	125431370	125473667	N:GEXP:SMARCD1:chr12:50478983:50494494:+:6602	SMARCD1	GEXP	12	50478983	50494494	74936876	13.3	21.3	0.513	303
N:GEXP:DHX37:chr12:125431370:125473667:-:57647	DHX37	GEXP	12	125431370	125473667	N:GEXP:TMEM120B:chr12:122150658:122220907:+:144404	TMEM120B	GEXP	12	122150658	122220907	3210463	12.5	20.6	0.505	303
N:GEXP:DHX37:chr12:125431370:125473667:-:57647	DHX37	GEXP	12	125431370	125473667	N:GEXP:MLXIP:chr12:122516652:122628967:+:22877	MLXIP	GEXP	12	122516652	122628967	2802403	12.3	20.4	0.503	303
N:GEXP:DHX37:chr12:125431370:125473667:-:57647	DHX37	GEXP	12	125431370	125473667	N:GEXP:MCEE:chr2:71336806:71357394:-:84693	MCEE	GEXP	2	71336806	71357394	500000000	11.9	20	-0.498	303
N:GEXP:DHX37:chr12:125431370:125473667:-:57647	DHX37	GEXP	12	125431370	125473667	N:GEXP:NOC4L:chr12:132628993:132636986:+:79050	NOC4L	GEXP	12	132628993	132636986	7155326	11.4	19.5	0.493	303
N:CNVR:12q24.32:chr12:127005000:127124999::	chr12:127,005,000-127,124,999 (120Mb, 12q24.32)	CNVR	12	127005000	127124999	N:GEXP:DHX37:chr12:125431370:125473667:-:57647	DHX37	GEXP	12	125431370	125473667	1531333	3	10.7	0.37	299
N:CNVR:LOC100128554:chr12:126951000:126993999::	chr12:126,951,000-126,993,999 (43Mb, LOC100128554)	CNVR	12	126951000	126993999	N:GEXP:DHX37:chr12:125431370:125473667:-:57647	DHX37	GEXP	12	125431370	125473667	1477333	2.9	10.7	0.369	299
N:CNVR:LOC100128554:chr12:126950000:126950999::	chr12:126,950,000-126,950,999 (100kb, LOC100128554)	CNVR	12	126950000	126950999	N:GEXP:DHX37:chr12:125431370:125473667:-:57647	DHX37	GEXP	12	125431370	125473667	1476333	2.6	10.4	0.364	299
N:CNVR:12q24.32:chr12:127131000:129229999::	chr12:127,131,000-129,229,999 (2bp, 12q24.32)	CNVR	12	127131000	129229999	N:GEXP:DHX37:chr12:125431370:125473667:-:57647	DHX37	GEXP	12	125431370	125473667	1657333	2.5	10.2	0.362	299
N:CNVR:12q24.32:chr12:126994000:127004999::	chr12:126,994,000-127,004,999 (11Mb, 12q24.32)	CNVR	12	126994000	127004999	N:GEXP:DHX37:chr12:125431370:125473667:-:57647	DHX37	GEXP	12	125431370	125473667	1520333	1.9	9.7	0.351	299
N:CNVR:12q24:chr12:119991000:126949999::	chr12:119,991,000-126,949,999 (7bp, 12q24)	CNVR	12	119991000	126949999	N:GEXP:DHX37:chr12:125431370:125473667:-:57647	DHX37	GEXP	12	125431370	125473667	0	1.9	9.6	0.35	299
N:CNVR:12q24.3:chr12:129233000:130002999::	chr12:129,233,000-130,002,999 (770Mb, 12q24.3)	CNVR	12	129233000	130002999	N:GEXP:DHX37:chr12:125431370:125473667:-:57647	DHX37	GEXP	12	125431370	125473667	3759333	1.3	9	0.338	299
N:CNVR:TMEM132D:chr12:130270000:130274999::	chr12:130,270,000-130,274,999 (5Mb, TMEM132D)	CNVR	12	130270000	130274999	N:GEXP:DHX37:chr12:125431370:125473667:-:57647	DHX37	GEXP	12	125431370	125473667	4796333	0.9	8.7	0.332	299
N:CNVR:TMEM132D:chr12:130147000:130269999::	chr12:130,147,000-130,269,999 (123Mb, TMEM132D)	CNVR	12	130147000	130269999	N:GEXP:DHX37:chr12:125431370:125473667:-:57647	DHX37	GEXP	12	125431370	125473667	4673333	0.7	8.5	0.327	299
N:CNVR:12q24.33:chr12:130275000:130518999::	chr12:130,275,000-130,518,999 (244Mb, 12q24.33)	CNVR	12	130275000	130518999	N:GEXP:DHX37:chr12:125431370:125473667:-:57647	DHX37	GEXP	12	125431370	125473667	4801333	0.8	8.5	0.328	299
N:CNVR:12q21.33:chr12:90493000:90493999::	chr12:90,493,000-90,493,999 (100kb, 12q21.33)	CNVR	12	90493000	90493999	N:GEXP:DHX37:chr12:125431370:125473667:-:57647	DHX37	GEXP	12	125431370	125473667	34937371	0.6	8.4	0.325	299
N:CNVR:TMEM132D:chr12:130003000:130003999::	chr12:130,003,000-130,003,999 (100kb, TMEM132D)	CNVR	12	130003000	130003999	N:GEXP:DHX37:chr12:125431370:125473667:-:57647	DHX37	GEXP	12	125431370	125473667	4529333	0.6	8.3	0.325	299
N:CNVR:TMEM132D:chr12:130004000:130144999::	chr12:130,004,000-130,144,999 (141Mb, TMEM132D)	CNVR	12	130004000	130144999	N:GEXP:DHX37:chr12:125431370:125473667:-:57647	DHX37	GEXP	12	125431370	125473667	4530333	0.6	8.3	0.325	299
N:CNVR:12q23.3:chr12:104698000:119987999::	chr12:104,698,000-119,987,999 (15bp, 12q23.3)	CNVR	12	104698000	119987999	N:GEXP:DHX37:chr12:125431370:125473667:-:57647	DHX37	GEXP	12	125431370	125473667	5443371	0.5	8.2	0.322	299
N:CNVR:AF086288:chr12:119988000:119990999::	chr12:119,988,000-119,990,999 (3Mb, AF086288)	CNVR	12	119988000	119990999	N:GEXP:DHX37:chr12:125431370:125473667:-:57647	DHX37	GEXP	12	125431370	125473667	5440371	0.4	8.1	0.32	299
N:CNVR:12q24.32:chr12:127125000:127130999::	chr12:127,125,000-127,130,999 (6Mb, 12q24.32)	CNVR	12	127125000	127130999	N:GEXP:DHX37:chr12:125431370:125473667:-:57647	DHX37	GEXP	12	125431370	125473667	1651333	0.2	7.9	0.316	299
N:CNVR:LOC100190940:chr12:130519000:130519999::	chr12:130,519,000-130,519,999 (100kb, LOC100190940)	CNVR	12	130519000	130519999	N:GEXP:DHX37:chr12:125431370:125473667:-:57647	DHX37	GEXP	12	125431370	125473667	5045333	0	7.8	0.312	299
N:CNVR:12q21.3:chr12:84166000:90490999::	chr12:84,166,000-90,490,999 (6bp, 12q21.3)	CNVR	12	84166000	90490999	N:GEXP:DHX37:chr12:125431370:125473667:-:57647	DHX37	GEXP	12	125431370	125473667	34940371	0.1	7.8	0.314	299
N:CNVR:12q24.33:chr12:130520000:132096999::	chr12:130,520,000-132,096,999 (2bp, 12q24.33)	CNVR	12	130520000	132096999	N:GEXP:DHX37:chr12:125431370:125473667:-:57647	DHX37	GEXP	12	125431370	125473667	5046333	0	7.7	0.31	299
N:CNVR:12q22:chr12:90494000:97874999::	chr12:90,494,000-97,874,999 (7bp, 12q22)	CNVR	12	90494000	97874999	N:GEXP:DHX37:chr12:125431370:125473667:-:57647	DHX37	GEXP	12	125431370	125473667	27556371	0	7.5	0.306	299
N:CNVR:12q23.1:chr12:97878000:98955999::	chr12:97,878,000-98,955,999 (1bp, 12q23.1)	CNVR	12	97878000	98955999	N:GEXP:DHX37:chr12:125431370:125473667:-:57647	DHX37	GEXP	12	125431370	125473667	26475371	0	7.4	0.304	299
N:CNVR:12q24.33:chr12:132097000:132119999::	chr12:132,097,000-132,119,999 (23Mb, 12q24.33)	CNVR	12	132097000	132119999	N:GEXP:DHX37:chr12:125431370:125473667:-:57647	DHX37	GEXP	12	125431370	125473667	6623333	0	7.2	0.301	299
N:CNVR:TMEM132D:chr12:130145000:130146999::	chr12:130,145,000-130,146,999 (2Mb, TMEM132D)	CNVR	12	130145000	130146999	N:GEXP:DHX37:chr12:125431370:125473667:-:57647	DHX37	GEXP	12	125431370	125473667	4671333	0	7.2	0.301	299
N:CNVR:12q23:chr12:102669000:104696999::	chr12:102,669,000-104,696,999 (2bp, 12q23)	CNVR	12	102669000	104696999	N:GEXP:DHX37:chr12:125431370:125473667:-:57647	DHX37	GEXP	12	125431370	125473667	20734371	0	7.1	0.297	299
N:CNVR:12q23.1:chr12:98958000:99794999::	chr12:98,958,000-99,794,999 (837Mb, 12q23.1)	CNVR	12	98958000	99794999	N:GEXP:DHX37:chr12:125431370:125473667:-:57647	DHX37	GEXP	12	125431370	125473667	25636371	0	7.1	0.297	299
N:CNVR:12q23:chr12:99804000:102667999::	chr12:99,804,000-102,667,999 (3bp, 12q23)	CNVR	12	99804000	102667999	N:GEXP:DHX37:chr12:125431370:125473667:-:57647	DHX37	GEXP	12	125431370	125473667	22763371	0	7.1	0.297	299
N:CNVR:12q24.32:chr12:129230000:129232999::	chr12:129,230,000-129,232,999 (3Mb, 12q24.32)	CNVR	12	129230000	129232999	N:GEXP:DHX37:chr12:125431370:125473667:-:57647	DHX37	GEXP	12	125431370	125473667	3756333	0	6.9	0.292	299
N:CNVR:12q24.33:chr12:132142000:133778000::	chr12:132,142,000-133,778,000 (2bp, 12q24.33)	CNVR	12	132142000	133778000	N:GEXP:DHX37:chr12:125431370:125473667:-:57647	DHX37	GEXP	12	125431370	125473667	6668333	0	6.8	0.289	299
N:CNVR:12q:chr12:35400000:132349534::GisticArm_r	12q (Gistic Arm)	CNVR	12	35400000	132349534	N:GEXP:DHX37:chr12:125431370:125473667:-:57647	DHX37	GEXP	12	125431370	125473667	0	0	6.6	0.285	299
N:CNVR:RMST:chr12:97875000:97877999::	chr12:97,875,000-97,877,999 (3Mb, RMST)	CNVR	12	97875000	97877999	N:GEXP:DHX37:chr12:125431370:125473667:-:57647	DHX37	GEXP	12	125431370	125473667	27553371	0	6.6	0.286	299
N:CNVR:SNORA35:chrX:115138000:115150999::	chrX:115,138,000-115,150,999 (13Mb, SNORA35)	CNVR	X	115138000	115150999	N:GEXP:DHX37:chr12:125431370:125473667:-:57647	DHX37	GEXP	12	125431370	125473667	500000000	0	6.5	0.283	299
N:CNVR:ANKS1B:chr12:99799000:99803999::	chr12:99,799,000-99,803,999 (5Mb, ANKS1B)	CNVR	12	99799000	99803999	N:GEXP:DHX37:chr12:125431370:125473667:-:57647	DHX37	GEXP	12	125431370	125473667	25627371	0	6.4	0.282	299
Table10.UCEC
id_a	pretty_label_a	datatype_a	chr_a	start_a	end_a	id_b	pretty_label_b	datatype_b	chr_b	start_b	end_b	link_distance	adj_logged_pvalue	logged_pvalue	correlation	num_nonna
N:GEXP:DHX37:chr12:125431370:125473667:-:57647	DHX37	GEXP	12	125431370	125473667	N:GEXP:PGAM5:chr12:133264635:133299323:+:192111	PGAM5	GEXP	12	133264635	133299323	7790968	43.7	51.7	0.686	368
N:GEXP:DDX54:chr12:113594978:113623284:-:79039	DDX54	GEXP	12	113594978	113623284	N:GEXP:DHX37:chr12:125431370:125473667:-:57647	DHX37	GEXP	12	125431370	125473667	11808086	32.8	40.9	0.627	368
N:GEXP:DHX37:chr12:125431370:125473667:-:57647	DHX37	GEXP	12	125431370	125473667	N:GEXP:HIRA:chr22:19318224:19435755:-:7290	HIRA	GEXP	22	19318224	19435755	500000000	32.5	40.6	0.625	368
N:GEXP:CAD:chr2:27440258:27466654:+:790	CAD	GEXP	2	27440258	27466654	N:GEXP:DHX37:chr12:125431370:125473667:-:57647	DHX37	GEXP	12	125431370	125473667	500000000	29.5	37.6	0.607	368
N:GEXP:DHX37:chr12:125431370:125473667:-:57647	DHX37	GEXP	12	125431370	125473667	N:GEXP:PCNXL3:chr11:65383783:65404910:+:399909	PCNXL3	GEXP	11	65383783	65404910	500000000	29.4	37.5	0.606	368
N:GEXP:DHX37:chr12:125431370:125473667:-:57647	DHX37	GEXP	12	125431370	125473667	N:GEXP:USP5:chr12:6961285:6975795:+:8078	USP5	GEXP	12	6961285	6975795	118455575	29	37.1	0.603	368
N:GEXP:DHX37:chr12:125431370:125473667:-:57647	DHX37	GEXP	12	125431370	125473667	N:GEXP:GCN1L1:chr12:120565014:120632513:-:10985	GCN1L1	GEXP	12	120565014	120632513	4798857	27.9	36	0.596	368
N:GEXP:DHX37:chr12:125431370:125473667:-:57647	DHX37	GEXP	12	125431370	125473667	N:GEXP:KIAA0664:chr17:2592680:2614927:-:23277	KIAA0664	GEXP	17	2592680	2614927	500000000	27.8	35.9	0.595	368
N:GEXP:DHX37:chr12:125431370:125473667:-:57647	DHX37	GEXP	12	125431370	125473667	N:GEXP:RAN:chr12:131356617:131360826:+:5901	RAN	GEXP	12	131356617	131360826	5882950	26.5	34.5	0.586	368
N:GEXP:DHX37:chr12:125431370:125473667:-:57647	DHX37	GEXP	12	125431370	125473667	N:GEXP:LOC401010:chr2:132199734:132202467:-:401010	LOC401010	GEXP	2	132199734	132202467	500000000	26.1	34.2	0.583	368
N:GEXP:DHX37:chr12:125431370:125473667:-:57647	DHX37	GEXP	12	125431370	125473667	N:GEXP:HCFC1:chrX:153213008:153236819:-:3054	HCFC1	GEXP	X	153213008	153236819	500000000	26	34.1	0.583	368
N:GEXP:DHX37:chr12:125431370:125473667:-:57647	DHX37	GEXP	12	125431370	125473667	N:GEXP:MCM2:chr3:127317253:127341278:+:4171	MCM2	GEXP	3	127317253	127341278	500000000	25.8	33.9	0.581	368
N:GEXP:DHX37:chr12:125431370:125473667:-:57647	DHX37	GEXP	12	125431370	125473667	N:GEXP:GATC:chr12:120884241:120901556:+:283459	GATC	GEXP	12	120884241	120901556	4529814	25.8	33.9	0.581	368
N:GEXP:DHX37:chr12:125431370:125473667:-:57647	DHX37	GEXP	12	125431370	125473667	N:GEXP:POLD1:chr19:50887593:50921271:+:5424	POLD1	GEXP	19	50887593	50921271	500000000	25.3	33.4	0.577	368
N:GEXP:DHX37:chr12:125431370:125473667:-:57647	DHX37	GEXP	12	125431370	125473667	N:GEXP:NOL6:chr9:33461351:33473941:-:65083	NOL6	GEXP	9	33461351	33473941	500000000	25.2	33.3	0.577	368
N:GEXP:DHX37:chr12:125431370:125473667:-:57647	DHX37	GEXP	12	125431370	125473667	N:GEXP:PES1:chr22:30972612:31003000:-:23481	PES1	GEXP	22	30972612	31003000	500000000	24.9	33	0.574	368
N:GEXP:DHX37:chr12:125431370:125473667:-:57647	DHX37	GEXP	12	125431370	125473667	N:GEXP:IPO4:chr14:24649425:24659859:-:79711	IPO4	GEXP	14	24649425	24659859	500000000	24.6	32.6	0.572	368
N:GEXP:DHX37:chr12:125431370:125473667:-:57647	DHX37	GEXP	12	125431370	125473667	N:GEXP:PLK1:chr16:23690201:23701688:+:5347	PLK1	GEXP	16	23690201	23701688	500000000	23.8	31.9	0.567	368
N:GEXP:DHX37:chr12:125431370:125473667:-:57647	DHX37	GEXP	12	125431370	125473667	N:GEXP:PWP2:chr21:45527208:45551063:+:5822	PWP2	GEXP	21	45527208	45551063	500000000	23.5	31.6	0.564	368
N:GEXP:DHX37:chr12:125431370:125473667:-:57647	DHX37	GEXP	12	125431370	125473667	N:GEXP:VARS:chr6:31745297:31763712:-:7407	VARS	GEXP	6	31745297	31763712	500000000	23.3	31.4	0.563	368
N:GEXP:DHX37:chr12:125431370:125473667:-:57647	DHX37	GEXP	12	125431370	125473667	N:GEXP:INCENP:chr11:61891445:61920635:+:3619	INCENP	GEXP	11	61891445	61920635	500000000	23.2	31.3	0.562	368
N:GEXP:DHX37:chr12:125431370:125473667:-:57647	DHX37	GEXP	12	125431370	125473667	N:GEXP:MARS:chr12:57881077:57911334:+:4141	MARS	GEXP	12	57881077	57911334	67520036	22.8	30.9	0.559	368
N:GEXP:DHX37:chr12:125431370:125473667:-:57647	DHX37	GEXP	12	125431370	125473667	N:GEXP:RNF26:chr11:119205210:119208024:+:79102	RNF26	GEXP	11	119205210	119208024	500000000	22.8	30.9	0.559	368
N:GEXP:DHX37:chr12:125431370:125473667:-:57647	DHX37	GEXP	12	125431370	125473667	N:GEXP:MRPL4:chr19:10362640:10370736:+:51073	MRPL4	GEXP	19	10362640	10370736	500000000	22.4	30.5	0.556	368
N:GEXP:DHX37:chr12:125431370:125473667:-:57647	DHX37	GEXP	12	125431370	125473667	N:GEXP:TUBA1C:chr12:49621709:49667113:+:84790	TUBA1C	GEXP	12	49621709	49667113	75764257	22.2	30.3	0.554	368
N:GEXP:DHX37:chr12:125431370:125473667:-:57647	DHX37	GEXP	12	125431370	125473667	N:GEXP:DPH2:chr1:44435653:44439043:+:1802	DPH2	GEXP	1	44435653	44439043	500000000	22.1	30.1	0.553	368
N:GEXP:DHX37:chr12:125431370:125473667:-:57647	DHX37	GEXP	12	125431370	125473667	N:GEXP:LMNB2:chr19:2428164:2456958:-:84823	LMNB2	GEXP	19	2428164	2456958	500000000	21.6	29.7	0.549	368
N:GEXP:DHX37:chr12:125431370:125473667:-:57647	DHX37	GEXP	12	125431370	125473667	N:GEXP:FASN:chr17:80036214:80056106:-:2194	FASN	GEXP	17	80036214	80056106	500000000	21.5	29.6	0.549	368
N:GEXP:DHX37:chr12:125431370:125473667:-:57647	DHX37	GEXP	12	125431370	125473667	N:GEXP:RPTOR:chr17:78518625:78940173:+:57521	RPTOR	GEXP	17	78518625	78940173	500000000	20.9	28.9	0.544	368
N:GEXP:ARFIP1:chr4:153701112:153833063:+:27236	ARFIP1	GEXP	4	153701112	153833063	N:GEXP:DHX37:chr12:125431370:125473667:-:57647	DHX37	GEXP	12	125431370	125473667	500000000	20.8	28.8	-0.543	368
N:GEXP:DHX37:chr12:125431370:125473667:-:57647	DHX37	GEXP	12	125431370	125473667	N:GEXP:POLR3E:chr16:22308741:22345343:+:55718	POLR3E	GEXP	16	22308741	22345343	500000000	20.5	28.6	0.54	368
N:GEXP:ATG9A:chr2:220082847:220094361:-:79065	ATG9A	GEXP	2	220082847	220094361	N:GEXP:DHX37:chr12:125431370:125473667:-:57647	DHX37	GEXP	12	125431370	125473667	500000000	20.3	28.4	0.539	368
N:GEXP:CCNF:chr16:2479395:2508859:+:899	CCNF	GEXP	16	2479395	2508859	N:GEXP:DHX37:chr12:125431370:125473667:-:57647	DHX37	GEXP	12	125431370	125473667	500000000	20.3	28.4	0.539	368
N:GEXP:DHX37:chr12:125431370:125473667:-:57647	DHX37	GEXP	12	125431370	125473667	N:GEXP:ZNF598:chr16:2047768:2059763:-:90850	ZNF598	GEXP	16	2047768	2059763	500000000	20.1	28.2	0.537	368
N:GEXP:BYSL:chr6:41888965:41900784:+:705	BYSL	GEXP	6	41888965	41900784	N:GEXP:DHX37:chr12:125431370:125473667:-:57647	DHX37	GEXP	12	125431370	125473667	500000000	19.8	27.9	0.535	368
N:GEXP:DHX37:chr12:125431370:125473667:-:57647	DHX37	GEXP	12	125431370	125473667	N:GEXP:NUP62:chr19:50410084:50432988:-:23636	NUP62	GEXP	19	50410084	50432988	500000000	19.4	27.4	0.531	368
N:GEXP:DHX37:chr12:125431370:125473667:-:57647	DHX37	GEXP	12	125431370	125473667	N:GEXP:ZNF48:chr16:30389633:30411429:+:197407	ZNF48	GEXP	16	30389633	30411429	500000000	19.3	27.4	0.53	368
N:GEXP:DHX37:chr12:125431370:125473667:-:57647	DHX37	GEXP	12	125431370	125473667	N:GEXP:PSMD2:chr3:184017022:184026840:+:5708	PSMD2	GEXP	3	184017022	184026840	500000000	18.9	27	0.527	368
N:GEXP:DHX37:chr12:125431370:125473667:-:57647	DHX37	GEXP	12	125431370	125473667	N:GEXP:WDR4:chr21:44263204:44299699:-:10785	WDR4	GEXP	21	44263204	44299699	500000000	18.9	27	0.527	368
N:GEXP:DHX37:chr12:125431370:125473667:-:57647	DHX37	GEXP	12	125431370	125473667	N:GEXP:SNRNP200:chr2:96940074:96971307:-:23020	SNRNP200	GEXP	2	96940074	96971307	500000000	18.9	26.9	0.527	368
N:GEXP:DHX37:chr12:125431370:125473667:-:57647	DHX37	GEXP	12	125431370	125473667	N:GEXP:POLR1A:chr2:86253451:86333278:-:25885	POLR1A	GEXP	2	86253451	86333278	500000000	18.8	26.9	0.526	368
N:GEXP:DHX37:chr12:125431370:125473667:-:57647	DHX37	GEXP	12	125431370	125473667	N:GEXP:PION:chr7:76940068:77045717:-:54103	PION	GEXP	7	76940068	77045717	500000000	18.7	26.8	-0.526	368
N:GEXP:DHX37:chr12:125431370:125473667:-:57647	DHX37	GEXP	12	125431370	125473667	N:GEXP:PCMTD1:chr8:52730140:52811735:-:115294	PCMTD1	GEXP	8	52730140	52811735	500000000	18.7	26.8	-0.525	368
N:GEXP:DHX37:chr12:125431370:125473667:-:57647	DHX37	GEXP	12	125431370	125473667	N:GEXP:RANGAP1:chr22:41641615:41682216:-:5905	RANGAP1	GEXP	22	41641615	41682216	500000000	18.6	26.7	0.524	368
N:GEXP:DHX37:chr12:125431370:125473667:-:57647	DHX37	GEXP	12	125431370	125473667	N:GEXP:FAM214A:chr15:52873518:52970953:-:56204	FAM214A	GEXP	15	52873518	52970953	500000000	18.6	26.7	-0.524	368
N:GEXP:DHX37:chr12:125431370:125473667:-:57647	DHX37	GEXP	12	125431370	125473667	N:GEXP:RAB35:chr12:120532899:120554643:-:11021	RAB35	GEXP	12	120532899	120554643	4876727	18.6	26.7	0.525	368
N:GEXP:DHX37:chr12:125431370:125473667:-:57647	DHX37	GEXP	12	125431370	125473667	N:GEXP:PSMD3:chr17:38137060:38154212:+:5709	PSMD3	GEXP	17	38137060	38154212	500000000	18.6	26.7	0.524	368
N:GEXP:DHX37:chr12:125431370:125473667:-:57647	DHX37	GEXP	12	125431370	125473667	N:GEXP:SPHAR:chr1:229440129:229441250:+:10638	SPHAR	GEXP	1	229440129	229441250	500000000	18.2	26.3	-0.521	368
N:GEXP:DHX37:chr12:125431370:125473667:-:57647	DHX37	GEXP	12	125431370	125473667	N:GEXP:H3F3A:chr1:226250407:226259703:+:3020	H3F3A	GEXP	1	226250407	226259703	500000000	18.1	26.2	-0.52	368
N:GEXP:DHX37:chr12:125431370:125473667:-:57647	DHX37	GEXP	12	125431370	125473667	N:GEXP:NOC2L:chr1:879583:894679:-:26155	NOC2L	GEXP	1	879583	894679	500000000	18	26.1	0.52	368
N:GEXP:DHX37:chr12:125431370:125473667:-:57647	DHX37	GEXP	12	125431370	125473667	N:GEXP:TMEM104:chr17:72772622:72835922:+:54868	TMEM104	GEXP	17	72772622	72835922	500000000	17.9	26	0.518	368
N:GEXP:DHX37:chr12:125431370:125473667:-:57647	DHX37	GEXP	12	125431370	125473667	N:GEXP:PLEKHM2:chr1:16010827:16061264:+:23207	PLEKHM2	GEXP	1	16010827	16061264	500000000	17.9	26	0.519	368
N:GEXP:DHX37:chr12:125431370:125473667:-:57647	DHX37	GEXP	12	125431370	125473667	N:GEXP:ORC1:chr1:52838501:52870143:-:4998	ORC1	GEXP	1	52838501	52870143	500000000	17.8	25.8	0.517	368
N:GEXP:DHX37:chr12:125431370:125473667:-:57647	DHX37	GEXP	12	125431370	125473667	N:GEXP:PRMT1:chr19:50180409:50191707:+:3276	PRMT1	GEXP	19	50180409	50191707	500000000	17.6	25.7	0.516	368
N:GEXP:DHX37:chr12:125431370:125473667:-:57647	DHX37	GEXP	12	125431370	125473667	N:GEXP:TMEM167B:chr1:109633403:109639554:+:56900	TMEM167B	GEXP	1	109633403	109639554	500000000	17.5	25.6	-0.515	368
N:GEXP:DHX37:chr12:125431370:125473667:-:57647	DHX37	GEXP	12	125431370	125473667	N:GEXP:MFN2:chr1:12040238:12073572:+:9927	MFN2	GEXP	1	12040238	12073572	500000000	17.4	25.5	0.514	368
N:GEXP:DHX37:chr12:125431370:125473667:-:57647	DHX37	GEXP	12	125431370	125473667	N:GEXP:MTIF3:chr13:28009776:28024739:-:219402	MTIF3	GEXP	13	28009776	28024739	500000000	17.4	25.5	-0.514	368
N:GEXP:BCAP29:chr7:107220422:107263762:+:55973	BCAP29	GEXP	7	107220422	107263762	N:GEXP:DHX37:chr12:125431370:125473667:-:57647	DHX37	GEXP	12	125431370	125473667	500000000	17.3	25.4	-0.513	368
N:GEXP:BET1:chr7:93592082:93633690:-:10282	BET1	GEXP	7	93592082	93633690	N:GEXP:DHX37:chr12:125431370:125473667:-:57647	DHX37	GEXP	12	125431370	125473667	500000000	17.4	25.4	-0.514	368
N:GEXP:DHX37:chr12:125431370:125473667:-:57647	DHX37	GEXP	12	125431370	125473667	N:GEXP:UBE2O:chr17:74385613:74449288:-:63893	UBE2O	GEXP	17	74385613	74449288	500000000	17.3	25.4	0.513	368
N:GEXP:DHX37:chr12:125431370:125473667:-:57647	DHX37	GEXP	12	125431370	125473667	N:GEXP:TMBIM4:chr12:66530717:66563807:-:51643	TMBIM4	GEXP	12	66530717	66563807	58867563	17.1	25.2	-0.511	368
N:GEXP:DHX37:chr12:125431370:125473667:-:57647	DHX37	GEXP	12	125431370	125473667	N:GEXP:NCOR2:chr12:124808957:125052010:-:9612	NCOR2	GEXP	12	124808957	125052010	379360	17.1	25.1	0.511	368
N:GEXP:DHX37:chr12:125431370:125473667:-:57647	DHX37	GEXP	12	125431370	125473667	N:GEXP:TONSL:chr8:145654163:145669812:-:4796	TONSL	GEXP	8	145654163	145669812	500000000	16.9	25	0.509	368
N:GEXP:DHX37:chr12:125431370:125473667:-:57647	DHX37	GEXP	12	125431370	125473667	N:GEXP:NDUFA5:chr7:123181083:123197958:-:4698	NDUFA5	GEXP	7	123181083	123197958	500000000	16.6	24.7	-0.507	368
N:GEXP:DHX37:chr12:125431370:125473667:-:57647	DHX37	GEXP	12	125431370	125473667	N:GEXP:DTWD1:chr15:49913226:49937333:+:56986	DTWD1	GEXP	15	49913226	49937333	500000000	16.6	24.7	-0.507	368
N:GEXP:DHX37:chr12:125431370:125473667:-:57647	DHX37	GEXP	12	125431370	125473667	N:GEXP:N4BP2L2:chr13:33006930:33112936:-:10443	N4BP2L2	GEXP	13	33006930	33112936	500000000	16.5	24.6	-0.506	368
N:GEXP:ABCF2:chr7:150904923:150924317:-:10061	ABCF2	GEXP	7	150904923	150924317	N:GEXP:DHX37:chr12:125431370:125473667:-:57647	DHX37	GEXP	12	125431370	125473667	500000000	16.5	24.6	0.506	368
N:GEXP:DHX37:chr12:125431370:125473667:-:57647	DHX37	GEXP	12	125431370	125473667	N:METH:C15orf42:chr15:90166033:::cg03312532	C15orf42 cg03312532	METH	15	90166033		500000000	10.7	19.2	0.452	368
N:GEXP:DHX37:chr12:125431370:125473667:-:57647	DHX37	GEXP	12	125431370	125473667	C:SAMP:mRNA_k3:::::	MRNA k3	SAMP				500000000	9.2	15.2		331
N:GEXP:DHX37:chr12:125431370:125473667:-:57647	DHX37	GEXP	12	125431370	125473667	B:SAMP:I(C1,C2|mRNA_k3):::::	MRNA k3: 1 vs 2	SAMP				500000000	7.5	14.9	0.524	235
N:GEXP:DHX37:chr12:125431370:125473667:-:57647	DHX37	GEXP	12	125431370	125473667	N:METH:SLC25A35:chr17:8198092:::cg07911673	SLC25A35 cg07911673	METH	17	8198092		500000000	6	14.5	0.396	368
N:GEXP:DHX37:chr12:125431370:125473667:-:57647	DHX37	GEXP	12	125431370	125473667	B:SAMP:I(C1|mRNA_k3):::::	MRNA k3: 1	SAMP				500000000	6.6	14	0.426	331
N:GEXP:DHX37:chr12:125431370:125473667:-:57647	DHX37	GEXP	12	125431370	125473667	N:METH:PEX11G:chr19:7553324:::cg03668539	PEX11G cg03668539	METH	19	7553324		500000000	4.7	13.2	0.377	368
N:GEXP:DHX37:chr12:125431370:125473667:-:57647	DHX37	GEXP	12	125431370	125473667	N:METH:CYP17A1:chr10:104597864:::cg24934431	CYP17A1 cg24934431	METH	10	104597864		500000000	4.3	12.8	-0.372	368
N:GEXP:DHX37:chr12:125431370:125473667:-:57647	DHX37	GEXP	12	125431370	125473667	B:SAMP:I(GRADE_3|tumor_grade):::::	tumor_grade GRADE_3	SAMP				500000000	5.1	12.5	0.39	351
B:CLIN:I(GRADE_3|tumor_grade):::::	tumor_grade GRADE_3	CLIN				N:GEXP:DHX37:chr12:125431370:125473667:-:57647	DHX37	GEXP	12	125431370	125473667	500000000	5.9	12.5	0.39	351
N:GEXP:DHX37:chr12:125431370:125473667:-:57647	DHX37	GEXP	12	125431370	125473667	N:SAMP:gexpFracON_3:::::	gexpFracON_3	SAMP				500000000	5.5	12.4	-0.366	368
N:GEXP:DHX37:chr12:125431370:125473667:-:57647	DHX37	GEXP	12	125431370	125473667	N:METH:MIR548H4:chr15:69116504:::cg01280098	MIR548H4 cg01280098	METH	15	69116504		500000000	3.8	12.3	0.431	257
N:GEXP:DHX37:chr12:125431370:125473667:-:57647	DHX37	GEXP	12	125431370	125473667	N:METH:ADRBK1:chr11:67033594:::cg14519515	ADRBK1 cg14519515	METH	11	67033594		500000000	3.7	12.2	0.363	368
C:CLIN:tumor_grade:::::	Tumor grade	CLIN				N:GEXP:DHX37:chr12:125431370:125473667:-:57647	DHX37	GEXP	12	125431370	125473667	500000000	6.3	12.2		351
N:GEXP:DHX37:chr12:125431370:125473667:-:57647	DHX37	GEXP	12	125431370	125473667	N:SAMP:gexpFracON_4:::::	gexpFracON_4	SAMP				500000000	5.3	12.2	-0.363	368
N:GEXP:DHX37:chr12:125431370:125473667:-:57647	DHX37	GEXP	12	125431370	125473667	N:METH:TAOK2:chr16:29984665:::cg10316764	TAOK2 cg10316764	METH	16	29984665		500000000	3.6	12.1	0.361	368
N:GEXP:DHX37:chr12:125431370:125473667:-:57647	DHX37	GEXP	12	125431370	125473667	N:METH:MYST4:chr10:76597927:::cg20721467	MYST4 cg20721467	METH	10	76597927		500000000	3.6	12.1	0.362	368
N:GEXP:DHX37:chr12:125431370:125473667:-:57647	DHX37	GEXP	12	125431370	125473667	N:METH:SLFNL1:chr1:41487437:::cg22005565	SLFNL1 cg22005565	METH	1	41487437		500000000	3.4	11.8	0.358	368
N:GEXP:DHX37:chr12:125431370:125473667:-:57647	DHX37	GEXP	12	125431370	125473667	N:METH:MLL2:chr12:49449136:::cg13007988	MLL2 cg13007988	METH	12	49449136		75982234	3.3	11.8	0.359	364
N:GEXP:DHX37:chr12:125431370:125473667:-:57647	DHX37	GEXP	12	125431370	125473667	N:METH:GLIS3:chr9:4151723:::cg09386615	GLIS3 cg09386615	METH	9	4151723		500000000	3.3	11.8	0.357	368
N:GEXP:DHX37:chr12:125431370:125473667:-:57647	DHX37	GEXP	12	125431370	125473667	N:METH:ITIH4:chr3:52864816:::cg17890764	ITIH4 cg17890764	METH	3	52864816		500000000	3.2	11.7	0.355	368
N:GEXP:DHX37:chr12:125431370:125473667:-:57647	DHX37	GEXP	12	125431370	125473667	N:METH:SLAIN1:chr13:78315584:::cg08504583	SLAIN1 cg08504583	METH	13	78315584		500000000	3	11.5	0.352	368
N:GEXP:DHX37:chr12:125431370:125473667:-:57647	DHX37	GEXP	12	125431370	125473667	N:METH:MIR645:chr20:49200925:::cg05093113	MIR645 cg05093113	METH	20	49200925		500000000	2.9	11.4	0.416	257
N:GEXP:DHX37:chr12:125431370:125473667:-:57647	DHX37	GEXP	12	125431370	125473667	N:METH:CIZ1:chr9:130968072:::cg05826823	CIZ1 cg05826823	METH	9	130968072		500000000	2.9	11.4	0.351	368
N:GEXP:DHX37:chr12:125431370:125473667:-:57647	DHX37	GEXP	12	125431370	125473667	N:METH:C2orf3:chr2:75938223:::cg11051158	C2orf3 cg11051158	METH	2	75938223		500000000	2.9	11.4	0.351	368
N:GEXP:DHX37:chr12:125431370:125473667:-:57647	DHX37	GEXP	12	125431370	125473667	N:METH:PMP22:chr17:15168658:::cg08343834	PMP22 cg08343834	METH	17	15168658		500000000	2.8	11.3	0.349	368
N:GEXP:DHX37:chr12:125431370:125473667:-:57647	DHX37	GEXP	12	125431370	125473667	N:METH:CNTD2:chr19:40731797:::cg09089053	CNTD2 cg09089053	METH	19	40731797		500000000	2.8	11.3	0.349	368
N:GEXP:DHX37:chr12:125431370:125473667:-:57647	DHX37	GEXP	12	125431370	125473667	B:SAMP:I(ENDOMETRIOID_ENDOMETRIAL_ADENOCARCINOMA_(GRADE_1_OR_2)|histological_type):::::	histological_type ENDOMETRIOID_ENDOMETRIAL_ADENOCARCINOMA_(GRADE_1_OR_2)	SAMP				500000000	3.9	11.3	-0.362	367
N:GEXP:DHX37:chr12:125431370:125473667:-:57647	DHX37	GEXP	12	125431370	125473667	B:SAMP:I(C2|mRNA_k3):::::	MRNA k3: 2	SAMP				500000000	3.8	11.3	-0.38	331
B:CLIN:I(ENDOMETRIOID_ENDOMETRIAL_ADENOCARCINOMA_(GRADE_1_OR_2)|histological_type):::::	histological_type ENDOMETRIOID_ENDOMETRIAL_ADENOCARCINOMA_(GRADE_1_OR_2)	CLIN				N:GEXP:DHX37:chr12:125431370:125473667:-:57647	DHX37	GEXP	12	125431370	125473667	500000000	4.7	11.3	-0.362	367
N:GEXP:DHX37:chr12:125431370:125473667:-:57647	DHX37	GEXP	12	125431370	125473667	N:MIRN:HSA-MIR-18A-3P:chr13:92003005:92003075:+:mature	HSA-MIR-18A-3P	MIRN	13	92003005	92003075	500000000	4	11.2	0.354	357
N:GEXP:DHX37:chr12:125431370:125473667:-:57647	DHX37	GEXP	12	125431370	125473667	B:SAMP:I(GRADE_1,GRADE_3|tumor_grade):::::	tumor_grade GRADE_1 vs GRADE_3	SAMP				500000000	3.7	11.2	-0.434	251
B:CLIN:I(GRADE_1,GRADE_3|tumor_grade):::::	tumor_grade GRADE_1 vs GRADE_3	CLIN				N:GEXP:DHX37:chr12:125431370:125473667:-:57647	DHX37	GEXP	12	125431370	125473667	500000000	4.5	11.2	-0.434	251
N:GEXP:DHX37:chr12:125431370:125473667:-:57647	DHX37	GEXP	12	125431370	125473667	N:METH:KIAA0020:chr9:2838508:::cg24471894	KIAA0020 cg24471894	METH	9	2838508		500000000	2.7	11.1	0.347	368
N:GEXP:DHX37:chr12:125431370:125473667:-:57647	DHX37	GEXP	12	125431370	125473667	N:METH:FAM124B:chr2:225266801:::cg24516901	FAM124B cg24516901	METH	2	225266801		500000000	2.6	11.1	0.346	368
N:GEXP:DHX37:chr12:125431370:125473667:-:57647	DHX37	GEXP	12	125431370	125473667	N:METH:LAMC2:chr1:183154778:::cg00208830	LAMC2 cg00208830	METH	1	183154778		500000000	2.6	11.1	0.347	368
N:GEXP:DHX37:chr12:125431370:125473667:-:57647	DHX37	GEXP	12	125431370	125473667	B:SAMP:I(C2|UCEC-TP_mRNAseq_CNMF_3):::::	UCEC-TP_mRNAseq_CNMF_3 C2	SAMP				500000000	3.5	11	0.355	368
C:CLIN:histology_grade:::::	Histology grade	CLIN				N:GEXP:DHX37:chr12:125431370:125473667:-:57647	DHX37	GEXP	12	125431370	125473667	500000000	5.2	11		351
N:GEXP:DHX37:chr12:125431370:125473667:-:57647	DHX37	GEXP	12	125431370	125473667	B:SAMP:I(C3|UCEC-TP_mRNAseq_CC_4):::::	UCEC-TP_mRNAseq_CC_4 C3	SAMP				500000000	3.4	10.8	0.352	368
N:GEXP:DHX37:chr12:125431370:125473667:-:57647	DHX37	GEXP	12	125431370	125473667	N:SAMP:gexpFracON_5:::::	gexpFracON_5	SAMP				500000000	3.7	10.6	-0.339	368
N:GEXP:DHX37:chr12:125431370:125473667:-:57647	DHX37	GEXP	12	125431370	125473667	C:SAMP:UCEC-TP_mRNAseq_CC_4:::::	UCEC-TP_mRNAseq_CC_4	SAMP				500000000	4.6	10.6		368
C:CLIN:neoplasm_histologic_grade:::::	Neoplasm histologic grade	CLIN				N:GEXP:DHX37:chr12:125431370:125473667:-:57647	DHX37	GEXP	12	125431370	125473667	500000000	4.5	10.4		367
N:GEXP:DHX37:chr12:125431370:125473667:-:57647	DHX37	GEXP	12	125431370	125473667	C:SAMP:UCEC-TP_mRNAseq_CNMF_3:::::	UCEC-TP_mRNAseq_CNMF_3	SAMP				500000000	4.3	10.2		368
N:GEXP:DHX37:chr12:125431370:125473667:-:57647	DHX37	GEXP	12	125431370	125473667	B:SAMP:I(G1,G3|neoplasm_histologic_grade):::::	neoplasm_histologic_grade G1 vs G3	SAMP				500000000	2.7	10.1	-0.403	261
C:CLIN:histological_type:::::	Histological type	CLIN				N:GEXP:DHX37:chr12:125431370:125473667:-:57647	DHX37	GEXP	12	125431370	125473667	500000000	4.2	10.1		367
N:GEXP:DHX37:chr12:125431370:125473667:-:57647	DHX37	GEXP	12	125431370	125473667	N:SAMP:gexpFracON_9:::::	gexpFracON_9	SAMP				500000000	3.2	10.1	0.33	368
B:CLIN:I(G1,G3|neoplasm_histologic_grade):::::	Neoplasm histologic grade: 1 vs 3	CLIN				N:GEXP:DHX37:chr12:125431370:125473667:-:57647	DHX37	GEXP	12	125431370	125473667	500000000	3.4	10.1	-0.403	261
B:CLIN:I(G3|neoplasm_histologic_grade):::::	Neoplasm histologic grade: 3	CLIN				N:GEXP:DHX37:chr12:125431370:125473667:-:57647	DHX37	GEXP	12	125431370	125473667	500000000	3.3	10	0.338	367
N:GEXP:DHX37:chr12:125431370:125473667:-:57647	DHX37	GEXP	12	125431370	125473667	B:SAMP:I(G3|neoplasm_histologic_grade):::::	neoplasm_histologic_grade G3	SAMP				500000000	2.5	10	0.338	367
N:GEXP:DHX37:chr12:125431370:125473667:-:57647	DHX37	GEXP	12	125431370	125473667	B:SAMP:I(C1,C2|UCEC-TP_miRseq_CNMF_3):::::	UCEC-TP_miRseq_CNMF_3 C1 vs C2	SAMP				500000000	2.5	9.9	-0.411	247
N:GEXP:DHX37:chr12:125431370:125473667:-:57647	DHX37	GEXP	12	125431370	125473667	B:SAMP:I(C2,C3|UCEC-TP_miRseq_CC_4):::::	UCEC-TP_miRseq_CC_4 C2 vs C3	SAMP				500000000	2.2	9.6	-0.384	274
N:GEXP:DHX37:chr12:125431370:125473667:-:57647	DHX37	GEXP	12	125431370	125473667	C:SAMP:UCEC-TP_miRseq_CNMF_3:::::	UCEC-TP_miRseq_CNMF_3	SAMP				500000000	3.6	9.5		360
N:GEXP:DHX37:chr12:125431370:125473667:-:57647	DHX37	GEXP	12	125431370	125473667	B:SAMP:I(C3|UCEC-TP_miRseq_CC_4):::::	UCEC-TP_miRseq_CC_4 C3	SAMP				500000000	2.1	9.5	0.333	360
N:GEXP:DHX37:chr12:125431370:125473667:-:57647	DHX37	GEXP	12	125431370	125473667	B:SAMP:I(C2|UCEC-TP_miRseq_CNMF_3):::::	UCEC-TP_miRseq_CNMF_3 C2	SAMP				500000000	1.9	9.4	0.329	360
N:GEXP:DHX37:chr12:125431370:125473667:-:57647	DHX37	GEXP	12	125431370	125473667	N:RPPA:CCNB1:chr5:68462837:68474070:+:Cyclin_B1-R-V	CCNB1	RPPA	5	68462837	68474070	500000000	2.7	9.1	0.421	196
N:GEXP:DHX37:chr12:125431370:125473667:-:57647	DHX37	GEXP	12	125431370	125473667	B:SAMP:I(C1,C2|UCEC-TP_mRNAseq_CNMF_3):::::	UCEC-TP_mRNAseq_CNMF_3 C1 vs C2	SAMP				500000000	1.7	9.1	-0.386	254
N:CNVR:19p13.3:chr19:3979428:3984411::UCEC-TP_Gistic_ROI_r_del	19p13.3 Deletion (Gistic, continuous)	CNVR	19	3979428	3984411	N:GEXP:DHX37:chr12:125431370:125473667:-:57647	DHX37	GEXP	12	125431370	125473667	500000000	1	8.8	-0.311	360
B:CLIN:I(ENDOGR1,ENDOGR3|histology_grade):::::	histology_grade ENDOGR1 vs ENDOGR3	CLIN				N:GEXP:DHX37:chr12:125431370:125473667:-:57647	DHX37	GEXP	12	125431370	125473667	500000000	2	8.7	-0.437	189
N:GEXP:DHX37:chr12:125431370:125473667:-:57647	DHX37	GEXP	12	125431370	125473667	B:SAMP:I(ENDOGR1,ENDOGR3|histology_grade):::::	histology_grade ENDOGR1 vs ENDOGR3	SAMP				500000000	1.2	8.7	-0.437	189
N:CNVR:12q24.31:chr12:122148000:125156999::	chr12:122,148,000-125,156,999 (3bp, 12q24.31)	CNVR	12	122148000	125156999	N:GEXP:DHX37:chr12:125431370:125473667:-:57647	DHX37	GEXP	12	125431370	125473667	274371	0.8	8.6	0.308	360
N:GEXP:DHX37:chr12:125431370:125473667:-:57647	DHX37	GEXP	12	125431370	125473667	N:SAMP:gexpFracON_2:::::	gexpFracON_2	SAMP				500000000	1.6	8.5	-0.302	368
N:GEXP:DHX37:chr12:125431370:125473667:-:57647	DHX37	GEXP	12	125431370	125473667	B:SAMP:I(C2,C3|UCEC-TP_mRNAseq_CC_4):::::	UCEC-TP_mRNAseq_CC_4 C2 vs C3	SAMP				500000000	1.1	8.5	-0.415	205
N:GEXP:DHX37:chr12:125431370:125473667:-:57647	DHX37	GEXP	12	125431370	125473667	B:SAMP:I(C1,C3|UCEC-TP_mRNAseq_CC_4):::::	UCEC-TP_mRNAseq_CC_4 C1 vs C3	SAMP				500000000	1	8.4	-0.382	238
N:GEXP:DHX37:chr12:125431370:125473667:-:57647	DHX37	GEXP	12	125431370	125473667	C:SAMP:UCEC-TP_miRseq_CC_4:::::	UCEC-TP_miRseq_CC_4	SAMP				500000000	2.3	8.3		360
N:GEXP:DHX37:chr12:125431370:125473667:-:57647	DHX37	GEXP	12	125431370	125473667	N:MIRN:HSA-MIR-301B:chr22:22007270:22007347:+:	HSA-MIR-301B	MIRN	22	22007270	22007347	500000000	1	8.2	0.301	360
N:GEXP:DHX37:chr12:125431370:125473667:-:57647	DHX37	GEXP	12	125431370	125473667	N:MIRN:HSA-MIR-222-5P:chrX:45606421:45606530:+:mature	HSA-MIR-222-5P	MIRN	X	45606421	45606530	500000000	0.7	8	0.298	357
N:GEXP:DHX37:chr12:125431370:125473667:-:57647	DHX37	GEXP	12	125431370	125473667	N:MIRN:HSA-MIR-18A:chr13:92003005:92003075:+:	HSA-MIR-18A	MIRN	13	92003005	92003075	500000000	0.8	8	0.297	360
N:CNVR:12q24.33:chr12:129342000:131833999::	chr12:129,342,000-131,833,999 (2bp, 12q24.33)	CNVR	12	129342000	131833999	N:GEXP:DHX37:chr12:125431370:125473667:-:57647	DHX37	GEXP	12	125431370	125473667	3868333	0.1	7.9	0.294	360
N:GEXP:DHX37:chr12:125431370:125473667:-:57647	DHX37	GEXP	12	125431370	125473667	B:SAMP:I(ENDOMETRIOID_ENDOMETRIAL_ADENOCARCINOMA_(GRADE_1_OR_2),ENDOMETRIOID_ENDOMETRIAL_ADENOCARCINOMA_(GRADE_3)|histological_type):::::	histological_type ENDOMETRIOID_ENDOMETRIAL_ADENOCARCINOMA_(GRADE_1_OR_2) vs ENDOMETRIOID_ENDOMETRIAL_ADENOCARCINOMA_(GRADE_3)	SAMP				500000000	0.2	7.7	-0.324	300
B:CLIN:I(ENDOMETRIOID_ENDOMETRIAL_ADENOCARCINOMA_(GRADE_1_OR_2),ENDOMETRIOID_ENDOMETRIAL_ADENOCARCINOMA_(GRADE_3)|histological_type):::::	histological_type ENDOMETRIOID_ENDOMETRIAL_ADENOCARCINOMA_(GRADE_1_OR_2) vs ENDOMETRIOID_ENDOMETRIAL_ADENOCARCINOMA_(GRADE_3)	CLIN				N:GEXP:DHX37:chr12:125431370:125473667:-:57647	DHX37	GEXP	12	125431370	125473667	500000000	1	7.7	-0.324	300
N:GEXP:DHX37:chr12:125431370:125473667:-:57647	DHX37	GEXP	12	125431370	125473667	N:MIRN:HSA-MIR-195-5P:chr17:6920934:6921020:+:mature	HSA-MIR-195-5P	MIRN	17	6920934	6921020	500000000	0.3	7.6	-0.29	357
N:GEXP:DHX37:chr12:125431370:125473667:-:57647	DHX37	GEXP	12	125431370	125473667	N:MIRN:HSA-MIR-190B:chr1:154166141:154166219:+:mature	HSA-MIR-190B	MIRN	1	154166141	154166219	500000000	0.3	7.6	-0.29	357
N:GEXP:DHX37:chr12:125431370:125473667:-:57647	DHX37	GEXP	12	125431370	125473667	N:MIRN:HSA-MIR-190B:chr1:154166141:154166219:+:	HSA-MIR-190B	MIRN	1	154166141	154166219	500000000	0.3	7.6	-0.288	360
N:GEXP:DHX37:chr12:125431370:125473667:-:57647	DHX37	GEXP	12	125431370	125473667	N:MIRN:HSA-MIR-301B:chr22:22007270:22007347:+:mature	HSA-MIR-301B	MIRN	22	22007270	22007347	500000000	0.3	7.6	0.289	357
N:CNVR:12q24.3:chr12:128728000:129333999::	chr12:128,728,000-129,333,999 (606Mb, 12q24.3)	CNVR	12	128728000	129333999	N:GEXP:DHX37:chr12:125431370:125473667:-:57647	DHX37	GEXP	12	125431370	125473667	3254333	0	7.6	0.289	360
N:CLIN:mrna_expression_cluster:::::	Mrna expression cluster	CLIN				N:GEXP:DHX37:chr12:125431370:125473667:-:57647	DHX37	GEXP	12	125431370	125473667	500000000	1.7	7.6	-0.3	331
N:CNVR:12q24.33:chr12:132094000:133161000::	chr12:132,094,000-133,161,000 (1bp, 12q24.33)	CNVR	12	132094000	133161000	N:GEXP:DHX37:chr12:125431370:125473667:-:57647	DHX37	GEXP	12	125431370	125473667	6620333	0	7.5	0.286	360
N:GEXP:DHX37:chr12:125431370:125473667:-:57647	DHX37	GEXP	12	125431370	125473667	N:SAMP:gexpFracON_6:::::	gexpFracON_6	SAMP				500000000	0.6	7.5	-0.284	368
N:GEXP:DHX37:chr12:125431370:125473667:-:57647	DHX37	GEXP	12	125431370	125473667	B:SAMP:I(C1,C3|UCEC-TP_miRseq_Mature_CNMF_3):::::	UCEC-TP miRseq Mature CNMF 3: 1 vs 3	SAMP				500000000	0	7.4	-0.405	184
N:GEXP:DHX37:chr12:125431370:125473667:-:57647	DHX37	GEXP	12	125431370	125473667	N:MIRN:HSA-MIR-195:chr17:6920934:6921020:+:	HSA-MIR-195	MIRN	17	6920934	6921020	500000000	0	7.3	-0.283	360
N:CNVR:GLT1D1:chr12:129334000:129341999::	chr12:129,334,000-129,341,999 (8Mb, GLT1D1)	CNVR	12	129334000	129341999	N:GEXP:DHX37:chr12:125431370:125473667:-:57647	DHX37	GEXP	12	125431370	125473667	3860333	0	7.2	0.279	360
N:GEXP:DHX37:chr12:125431370:125473667:-:57647	DHX37	GEXP	12	125431370	125473667	N:SAMP:gexpFracON_8:::::	gexpFracON_8	SAMP				500000000	0.3	7.2	0.277	368
N:GEXP:DHX37:chr12:125431370:125473667:-:57647	DHX37	GEXP	12	125431370	125473667	B:SAMP:I(C2,C3|UCEC-TP_mRNAseq_CNMF_3):::::	UCEC-TP_mRNAseq_CNMF_3 C2 vs C3	SAMP				500000000	0	7.2	0.34	255
N:CNVR:LOC338797:chr12:131834000:132093999::	chr12:131,834,000-132,093,999 (260Mb, LOC338797)	CNVR	12	131834000	132093999	N:GEXP:DHX37:chr12:125431370:125473667:-:57647	DHX37	GEXP	12	125431370	125473667	6360333	0	7.1	0.278	360
N:GEXP:DHX37:chr12:125431370:125473667:-:57647	DHX37	GEXP	12	125431370	125473667	N:MIRN:HSA-MIR-20A-3P:chr13:92003319:92003389:+:mature	HSA-MIR-20A-3P	MIRN	13	92003319	92003389	500000000	0	7.1	0.28	357
N:GEXP:DHX37:chr12:125431370:125473667:-:57647	DHX37	GEXP	12	125431370	125473667	B:SAMP:I(C3|UCEC-TP_miRseq_Mature_CNMF_3):::::	UCEC-TP miRseq Mature CNMF 3: 3	SAMP				500000000	0	7.1	0.351	236
N:GEXP:DHX37:chr12:125431370:125473667:-:57647	DHX37	GEXP	12	125431370	125473667	B:SAMP:I(C20|iCluster_k25):::::	ICluster k25: 20	SAMP				500000000	0	7.1	-0.35	235
B:CLIN:I(ENDOGR1|histology_grade):::::	histology_grade ENDOGR1	CLIN				N:GEXP:DHX37:chr12:125431370:125473667:-:57647	DHX37	GEXP	12	125431370	125473667	500000000	0.3	7	-0.285	351
N:GEXP:DHX37:chr12:125431370:125473667:-:57647	DHX37	GEXP	12	125431370	125473667	B:SAMP:I(GRADE_1|tumor_grade):::::	tumor_grade GRADE_1	SAMP				500000000	0	7	-0.285	351
N:GEXP:DHX37:chr12:125431370:125473667:-:57647	DHX37	GEXP	12	125431370	125473667	B:SAMP:I(ENDOGR1|histology_grade):::::	histology_grade ENDOGR1	SAMP				500000000	0	7	-0.285	351
B:CLIN:I(GRADE_1|tumor_grade):::::	tumor_grade GRADE_1	CLIN				N:GEXP:DHX37:chr12:125431370:125473667:-:57647	DHX37	GEXP	12	125431370	125473667	500000000	0.3	7	-0.285	351
N:CNVR:12q24.31:chr12:125157000:125159999::	chr12:125,157,000-125,159,999 (3Mb, 12q24.31)	CNVR	12	125157000	125159999	N:GEXP:DHX37:chr12:125431370:125473667:-:57647	DHX37	GEXP	12	125431370	125473667	271371	0	6.9	0.275	360
N:CNVR:12q24.3:chr12:125160000:127357999::	chr12:125,160,000-127,357,999 (2bp, 12q24.3)	CNVR	12	125160000	127357999	N:GEXP:DHX37:chr12:125431370:125473667:-:57647	DHX37	GEXP	12	125431370	125473667	0	0	6.9	0.274	360
N:GEXP:DHX37:chr12:125431370:125473667:-:57647	DHX37	GEXP	12	125431370	125473667	C:SAMP:UCEC-TP_miRseq_Mature_CNMF_3:::::	UCEC-TP miRseq Mature CNMF 3	SAMP				500000000	1	6.9		236
N:CNVR:12q24.32:chr12:128192000:128727999::	chr12:128,192,000-128,727,999 (536Mb, 12q24.32)	CNVR	12	128192000	128727999	N:GEXP:DHX37:chr12:125431370:125473667:-:57647	DHX37	GEXP	12	125431370	125473667	2718333	0	6.8	0.273	360
N:CNVR:12q24.32:chr12:127358000:128191999::	chr12:127,358,000-128,191,999 (834Mb, 12q24.32)	CNVR	12	127358000	128191999	N:GEXP:DHX37:chr12:125431370:125473667:-:57647	DHX37	GEXP	12	125431370	125473667	1884333	0	6.8	0.272	360
N:GEXP:DHX37:chr12:125431370:125473667:-:57647	DHX37	GEXP	12	125431370	125473667	B:SAMP:I(G1|neoplasm_histologic_grade):::::	neoplasm_histologic_grade G1	SAMP				500000000	0	6.8	-0.274	367
B:CLIN:I(G1|neoplasm_histologic_grade):::::	Neoplasm histologic grade: 1	CLIN				N:GEXP:DHX37:chr12:125431370:125473667:-:57647	DHX37	GEXP	12	125431370	125473667	500000000	0.2	6.8	-0.274	367
N:GEXP:DHX37:chr12:125431370:125473667:-:57647	DHX37	GEXP	12	125431370	125473667	B:SAMP:I(ENDOGR1,SEROUSGR3|histology_grade):::::	histology_grade ENDOGR1 vs SEROUSGR3	SAMP				500000000	0	6.8	-0.45	136
N:GEXP:DHX37:chr12:125431370:125473667:-:57647	DHX37	GEXP	12	125431370	125473667	B:SAMP:I(GRADE_2,GRADE_3|tumor_grade):::::	tumor_grade GRADE_2 vs GRADE_3	SAMP				500000000	0	6.8	-0.321	267
B:CLIN:I(ENDOGR1,SEROUSGR3|histology_grade):::::	histology_grade ENDOGR1 vs SEROUSGR3	CLIN				N:GEXP:DHX37:chr12:125431370:125473667:-:57647	DHX37	GEXP	12	125431370	125473667	500000000	0.1	6.8	-0.45	136
B:CLIN:I(GRADE_2,GRADE_3|tumor_grade):::::	tumor_grade GRADE_2 vs GRADE_3	CLIN				N:GEXP:DHX37:chr12:125431370:125473667:-:57647	DHX37	GEXP	12	125431370	125473667	500000000	0.1	6.8	-0.321	267
N:GEXP:DHX37:chr12:125431370:125473667:-:57647	DHX37	GEXP	12	125431370	125473667	N:RPPA:CDK1:chr10:62538089:62554610:+:CDK1-R-V	CDK1	RPPA	10	62538089	62554610	500000000	0.3	6.7	0.362	196
N:GEXP:DHX37:chr12:125431370:125473667:-:57647	DHX37	GEXP	12	125431370	125473667	B:SAMP:I(C2|UCEC-TP_meth_CNMF_3):::::	UCEC-TP meth CNMF 3: 2	SAMP				500000000	0	6.7	0.325	256
N:GEXP:DHX37:chr12:125431370:125473667:-:57647	DHX37	GEXP	12	125431370	125473667	N:MIRN:HSA-MIR-19B-1:chr13:92003446:92003532:+:	HSA-MIR-19B-1	MIRN	13	92003446	92003532	500000000	0	6.6	0.269	360
N:GEXP:DHX37:chr12:125431370:125473667:-:57647	DHX37	GEXP	12	125431370	125473667	N:MIRN:HSA-MIR-664A:chr1:220373880:220373961:+:	HSA-MIR-664A	MIRN	1	220373880	220373961	500000000	0	6.6	-0.267	360
N:GEXP:DHX37:chr12:125431370:125473667:-:57647	DHX37	GEXP	12	125431370	125473667	B:SAMP:I(C1,C3|yliu_k4):::::	Yliu k4: 1 vs 3	SAMP				500000000	0	6.6	-0.424	148
N:GEXP:DHX37:chr12:125431370:125473667:-:57647	DHX37	GEXP	12	125431370	125473667	B:SAMP:I(C3|yliu_k4):::::	Yliu k4: 3	SAMP				500000000	0	6.6	0.315	269
N:CNVR:12q24.31:chr12:121644000:122147999::	chr12:121,644,000-122,147,999 (504Mb, 12q24.31)	CNVR	12	121644000	122147999	N:GEXP:DHX37:chr12:125431370:125473667:-:57647	DHX37	GEXP	12	125431370	125473667	3283371	0	6.5	0.266	360
N:GEXP:DHX37:chr12:125431370:125473667:-:57647	DHX37	GEXP	12	125431370	125473667	N:MIRN:HSA-MIR-135A-3P:chr3:52328235:52328324:+:mature	HSA-MIR-135A-3P	MIRN	3	52328235	52328324	500000000	0	6.5	-0.268	357
N:GEXP:DHX37:chr12:125431370:125473667:-:57647	DHX37	GEXP	12	125431370	125473667	B:SAMP:I(C1|UCEC-TP_miRseq_CNMF_3):::::	UCEC-TP_miRseq_CNMF_3 C1	SAMP				500000000	0	6.5	-0.27	360
N:GEXP:DHX37:chr12:125431370:125473667:-:57647	DHX37	GEXP	12	125431370	125473667	C:SAMP:yliu_k4:::::	Yliu k4	SAMP				500000000	0.6	6.5		269
N:GEXP:DHX37:chr12:125431370:125473667:-:57647	DHX37	GEXP	12	125431370	125473667	N:MIRN:HSA-MIR-15B-3P:chr3:160122376:160122473:+:mature	HSA-MIR-15B-3P	MIRN	3	160122376	160122473	500000000	0	6.4	0.264	357
N:GEXP:DHX37:chr12:125431370:125473667:-:57647	DHX37	GEXP	12	125431370	125473667	N:MIRN:HSA-MIR-942:chr1:117637265:117637350:+:	HSA-MIR-942	MIRN	1	117637265	117637350	500000000	0	6.4	0.263	360
N:GEXP:DHX37:chr12:125431370:125473667:-:57647	DHX37	GEXP	12	125431370	125473667	N:MIRN:HSA-MIR-187:chr18:33484781:33484889:+:	HSA-MIR-187	MIRN	18	33484781	33484889	500000000	0	6.4	-0.264	360
N:GEXP:DHX37:chr12:125431370:125473667:-:57647	DHX37	GEXP	12	125431370	125473667	N:MIRN:HSA-MIR-187-3P:chr18:33484781:33484889:+:mature	HSA-MIR-187-3P	MIRN	18	33484781	33484889	500000000	0	6.4	-0.265	357
N:GEXP:DHX37:chr12:125431370:125473667:-:57647	DHX37	GEXP	12	125431370	125473667	B:SAMP:I(ENDOMETRIOID_ENDOMETRIAL_ADENOCARCINOMA_(GRADE_1_OR_2),SEROUS_ENDOMETRIAL_ADENOCARCINOMA|histological_type):::::	histological_type ENDOMETRIOID_ENDOMETRIAL_ADENOCARCINOMA_(GRADE_1_OR_2) vs SEROUS_ENDOMETRIAL_ADENOCARCINOMA	SAMP				500000000	0	6.4	-0.327	241
B:CLIN:I(ENDOMETRIOID_ENDOMETRIAL_ADENOCARCINOMA_(GRADE_1_OR_2),SEROUS_ENDOMETRIAL_ADENOCARCINOMA|histological_type):::::	histological_type ENDOMETRIOID_ENDOMETRIAL_ADENOCARCINOMA_(GRADE_1_OR_2) vs SEROUS_ENDOMETRIAL_ADENOCARCINOMA	CLIN				N:GEXP:DHX37:chr12:125431370:125473667:-:57647	DHX37	GEXP	12	125431370	125473667	500000000	0	6.4	-0.327	241
N:GEXP:DHX37:chr12:125431370:125473667:-:57647	DHX37	GEXP	12	125431370	125473667	N:GNAB:TP53:chr17:7565097:7590863:-:binding_delta_abs_somatic	TP53 - binding delta_abs_somatic	GNAB	17	7565097	7590863	500000000	1.4	6.3	0.318	240
N:GEXP:DHX37:chr12:125431370:125473667:-:57647	DHX37	GEXP	12	125431370	125473667	N:MIRN:HSA-MIR-17:chr13:92002859:92002942:+:	HSA-MIR-17	MIRN	13	92002859	92002942	500000000	0	6.3	0.262	360
N:GEXP:DHX37:chr12:125431370:125473667:-:57647	DHX37	GEXP	12	125431370	125473667	N:MIRN:HSA-MIR-551B-3P:chr3:168269642:168269737:+:mature	HSA-MIR-551B-3P	MIRN	3	168269642	168269737	500000000	0	6.3	0.263	357
N:GEXP:DHX37:chr12:125431370:125473667:-:57647	DHX37	GEXP	12	125431370	125473667	B:SAMP:I(C1,C3|mRNA_k3):::::	MRNA k3: 1 vs 3	SAMP				500000000	0	6.3	0.339	220
N:GEXP:DHX37:chr12:125431370:125473667:-:57647	DHX37	GEXP	12	125431370	125473667	N:MIRN:HSA-MIR-1224-5P:chr3:183959193:183959277:+:mature	HSA-MIR-1224-5P	MIRN	3	183959193	183959277	500000000	0	6.2	-0.26	357
N:GEXP:DHX37:chr12:125431370:125473667:-:57647	DHX37	GEXP	12	125431370	125473667	N:MIRN:HSA-MIR-20A:chr13:92003319:92003389:+:	HSA-MIR-20A	MIRN	13	92003319	92003389	500000000	0	6.2	0.26	360
N:GEXP:DHX37:chr12:125431370:125473667:-:57647	DHX37	GEXP	12	125431370	125473667	N:MIRN:HSA-MIR-551A:chr1:3477259:3477354:+:	HSA-MIR-551A	MIRN	1	3477259	3477354	500000000	0	6.1	0.258	360
N:GEXP:DHX37:chr12:125431370:125473667:-:57647	DHX37	GEXP	12	125431370	125473667	N:MIRN:HSA-MIR-3648:chr21:9825832:9826011:+:	HSA-MIR-3648	MIRN	21	9825832	9826011	500000000	0	6.1	0.257	360
N:GEXP:DHX37:chr12:125431370:125473667:-:57647	DHX37	GEXP	12	125431370	125473667	N:MIRN:HSA-MIR-636:chr17:74732532:74732630:+:	HSA-MIR-636	MIRN	17	74732532	74732630	500000000	0	6.1	0.257	360
N:GEXP:DHX37:chr12:125431370:125473667:-:57647	DHX37	GEXP	12	125431370	125473667	B:GNAB:TP53:chr17:7565097:7590863:-:code_potential_somatic	TP53 - Protein Coding	GNAB	17	7565097	7590863	500000000	0	6	0.315	241
N:GEXP:DHX37:chr12:125431370:125473667:-:57647	DHX37	GEXP	12	125431370	125473667	B:GNAB:TP53:chr17:7565097:7590863:-:nonsilent_somatic	TP53 - Excluding Silent Mutations	GNAB	17	7565097	7590863	500000000	0	6	0.315	241
N:GEXP:DHX37:chr12:125431370:125473667:-:57647	DHX37	GEXP	12	125431370	125473667	B:GNAB:TP53:chr17:7565097:7590863:-:y_n_somatic	TP53 - All Mutations	GNAB	17	7565097	7590863	500000000	0	6	0.314	241
N:GEXP:DHX37:chr12:125431370:125473667:-:57647	DHX37	GEXP	12	125431370	125473667	N:MIRN:HSA-MIR-1224:chr3:183959193:183959277:+:	HSA-MIR-1224	MIRN	3	183959193	183959277	500000000	0	6	-0.255	360
N:GEXP:DHX37:chr12:125431370:125473667:-:57647	DHX37	GEXP	12	125431370	125473667	N:MIRN:HSA-MIR-21-3P:chr17:57918627:57918698:+:mature	HSA-MIR-21-3P	MIRN	17	57918627	57918698	500000000	0	6	0.255	357
N:GEXP:DHX37:chr12:125431370:125473667:-:57647	DHX37	GEXP	12	125431370	125473667	N:SAMP:LKB1_signaling_events_1:::::TK	LKB1 signaling events 1	SAMP				500000000	0	6	0.314	233
N:GEXP:DHX37:chr12:125431370:125473667:-:57647	DHX37	GEXP	12	125431370	125473667	N:SAMP:Aurora_A_signaling_2:::::TK	Aurora A signaling 2	SAMP				500000000	0	6	0.314	233
Table11.THCA
id_a	pretty_label_a	datatype_a	chr_a	start_a	end_a	id_b	pretty_label_b	datatype_b	chr_b	start_b	end_b	link_distance	adj_logged_pvalue	logged_pvalue	correlation	num_nonna
N:GEXP:DHX37:chr12:125431371:125473668:-:57647	DHX37	GEXP	12	125431371	125473668	N:METH:GALNT3:chr2:166626783:::cg15739581_Body	GALNT3 (Body) cg15739581	METH	2	166626783		500000000	20.7	29.2	0.49	482
N:GEXP:DHX37:chr12:125431371:125473668:-:57647	DHX37	GEXP	12	125431371	125473668	N:MIRN:hsa-miR-1251:chr12:97885687:97885756:+:MIMAT0005903	hsa-miR-1251	MIRN	12	97885687	97885756	27545615	12.2	19.2	-0.4	481
N:GEXP:DHX37:chr12:125431371:125473668:-:57647	DHX37	GEXP	12	125431371	125473668	N:MIRN:hsa-miR-128:chr2:136422967:136423048:+:MIMAT0000424	hsa-miR-128	MIRN	2	136422967	136423048	500000000	9.9	16.9	-0.38	481
N:GEXP:DHX37:chr12:125431371:125473668:-:57647	DHX37	GEXP	12	125431371	125473668	N:MIRN:hsa-miR-1301:chr2:25551509:25551590:+:MIMAT0005797	hsa-miR-1301	MIRN	2	25551509	25551590	500000000	8.4	15.5	-0.36	481
N:GEXP:DHX37:chr12:125431371:125473668:-:57647	DHX37	GEXP	12	125431371	125473668	N:MIRN:hsa-miR-99b-3p:chr19:52195865:52195934:+:MIMAT0004678	hsa-miR-99b-3p	MIRN	19	52195865	52195934	500000000	8.3	15.4	-0.36	481
N:GEXP:DHX37:chr12:125431371:125473668:-:57647	DHX37	GEXP	12	125431371	125473668	N:MIRN:hsa-miR-484:chr16:15737151:15737229:+:MIMAT0002174	hsa-miR-484	MIRN	16	15737151	15737229	500000000	8.3	15.4	-0.36	481
N:GEXP:DHX37:chr12:125431371:125473668:-:57647	DHX37	GEXP	12	125431371	125473668	B:GNAB:BRAF:chr7:140419127:140624564:-:mnf_somatic	BRAF - Missense-Nonsense-Frameshift	GNAB	7	140419127	140624564	500000000	7	14.4	0.4	390
N:GEXP:DHX37:chr12:125431371:125473668:-:57647	DHX37	GEXP	12	125431371	125473668	B:GNAB:BRAF:chr7:140433813:140624564:-:hs_599_601	BRAF - hs 599_601	GNAB	7	140433813	140624564	500000000	6.9	14.3	0.4	391
N:GEXP:DHX37:chr12:125431371:125473668:-:57647	DHX37	GEXP	12	125431371	125473668	B:GNAB:BRAF:chr7:140419127:140624564:-:dom_457_712_somatic	BRAF - dom 457_712_somatic	GNAB	7	140419127	140624564	500000000	6.6	14	0.39	390
N:GEXP:DHX37:chr12:125431371:125473668:-:57647	DHX37	GEXP	12	125431371	125473668	N:MIRN:hsa-miR-146b-5p:chr10:104196269:104196341:+:MIMAT0002809	hsa-miR-146b-5p	MIRN	10	104196269	104196341	500000000	6.8	13.8	0.34	481
N:GEXP:DHX37:chr12:125431371:125473668:-:57647	DHX37	GEXP	12	125431371	125473668	B:GNAB:BRAF:chr7:140433813:140624564:-:hs_49_762	BRAF - hs 49_762	GNAB	7	140433813	140624564	500000000	6.4	13.8	0.39	391
N:GEXP:DHX37:chr12:125431371:125473668:-:57647	DHX37	GEXP	12	125431371	125473668	N:MIRN:hsa-miR-1287:chr10:100154975:100155064:+:MIMAT0005878	hsa-miR-1287	MIRN	10	100154975	100155064	500000000	6.6	13.6	-0.34	481
N:GEXP:DHX37:chr12:125431371:125473668:-:57647	DHX37	GEXP	12	125431371	125473668	B:SAMP:I(C1|THCA-TP_mRNAseq_CNMF_4):::::	THCA-TP mRNAseq CNMF 4: 1	SAMP				500000000	7.2	13.6	-0.35	482
N:GEXP:DHX37:chr12:125431371:125473668:-:57647	DHX37	GEXP	12	125431371	125473668	N:MIRN:hsa-miR-130b-5p:chr22:22007593:22007674:+:MIMAT0004680	hsa-miR-130b-5p	MIRN	22	22007593	22007674	500000000	6.1	13.2	-0.33	481
N:GEXP:DHX37:chr12:125431371:125473668:-:57647	DHX37	GEXP	12	125431371	125473668	N:MIRN:hsa-miR-22-3p:chr17:1617197:1617281:+:MIMAT0000077	hsa-miR-22-3p	MIRN	17	1617197	1617281	500000000	6	13.1	-0.33	481
N:GEXP:DHX37:chr12:125431371:125473668:-:57647	DHX37	GEXP	12	125431371	125473668	B:SAMP:I(C1|mRNA_all_k1_4):::::	Gene Expression Cluster: 1	SAMP				500000000	6.6	13	-0.34	482
N:GEXP:DHX37:chr12:125431371:125473668:-:57647	DHX37	GEXP	12	125431371	125473668	B:SAMP:I(C1|THCA-TP_mRNAseq_CC_4):::::	THCA-TP mRNAseq CC 4: 1	SAMP				500000000	6.6	13	-0.34	482
N:GEXP:DHX37:chr12:125431371:125473668:-:57647	DHX37	GEXP	12	125431371	125473668	B:GNAB:BRAF:chr7:140419127:140624564:-:mni_somatic	BRAF - Missense-Nonsense-Inframe-Frameshift	GNAB	7	140419127	140624564	500000000	5.5	12.9	0.38	390
N:GEXP:DHX37:chr12:125431371:125473668:-:57647	DHX37	GEXP	12	125431371	125473668	N:MIRN:hsa-miR-204-5p:chr9:73424891:73425000:+:MIMAT0000265	hsa-miR-204-5p	MIRN	9	73424891	73425000	500000000	5.8	12.9	-0.33	481
N:GEXP:DHX37:chr12:125431371:125473668:-:57647	DHX37	GEXP	12	125431371	125473668	B:SAMP:I(C0|BRAF_cluster):::::	BRAF Cluster: No BRAF	SAMP				500000000	6.5	12.9	-0.38	391
N:GEXP:DHX37:chr12:125431371:125473668:-:57647	DHX37	GEXP	12	125431371	125473668	C:SAMP:THCA-TP_mRNAseq_CNMF_4:::::	THCA-TP mRNAseq CNMF 4	SAMP				500000000	7.1	12.7		482
N:GEXP:DHX37:chr12:125431371:125473668:-:57647	DHX37	GEXP	12	125431371	125473668	N:MIRN:hsa-miR-652-3p:chrX:109298557:109298654:+:MIMAT0003322	hsa-miR-652-3p	MIRN	X	109298557	109298654	500000000	5.5	12.6	-0.33	481
N:GEXP:DHX37:chr12:125431371:125473668:-:57647	DHX37	GEXP	12	125431371	125473668	N:MIRN:hsa-miR-331-3p:chr12:95702196:95702289:+:MIMAT0000760	hsa-miR-331-3p	MIRN	12	95702196	95702289	29729082	5.5	12.5	-0.32	481
N:GEXP:DHX37:chr12:125431371:125473668:-:57647	DHX37	GEXP	12	125431371	125473668	B:GNAB:BRAF:chr7:140419127:140624564:-:code_potential_somatic	BRAF - Protein Coding	GNAB	7	140419127	140624564	500000000	5.1	12.5	0.37	390
N:GEXP:DHX37:chr12:125431371:125473668:-:57647	DHX37	GEXP	12	125431371	125473668	B:SAMP:I(C1,C2|THCA-TP_mRNAseq_CC_4):::::	THCA-TP mRNAseq CC 4: 1 vs 2	SAMP				500000000	6	12.4	-0.39	346
N:GEXP:DHX37:chr12:125431371:125473668:-:57647	DHX37	GEXP	12	125431371	125473668	B:SAMP:I(C1,C4|THCA-TP_mRNAseq_CNMF_4):::::	THCA-TP mRNAseq CNMF 4: 1 vs 4	SAMP				500000000	6	12.4	-0.41	313
N:GEXP:DHX37:chr12:125431371:125473668:-:57647	DHX37	GEXP	12	125431371	125473668	B:GNAB:BRAF:chr7:140419127:140624564:-:V600E	BRAF - V600E	GNAB	7	140419127	140624564	500000000	4.9	12.2	0.37	390
N:GEXP:DHX37:chr12:125431371:125473668:-:57647	DHX37	GEXP	12	125431371	125473668	B:GNAB:BRAF:chr7:140419127:140624564:-:y_n_somatic	BRAF - All Mutations	GNAB	7	140419127	140624564	500000000	4.6	12	0.36	390
N:GEXP:DHX37:chr12:125431371:125473668:-:57647	DHX37	GEXP	12	125431371	125473668	C:SAMP:THCA-TP_mRNAseq_CC_4:::::	THCA-TP mRNAseq CC 4	SAMP				500000000	6.3	12		482
N:GEXP:DHX37:chr12:125431371:125473668:-:57647	DHX37	GEXP	12	125431371	125473668	C:SAMP:BRAF_cluster:::::	BRAF Cluster	SAMP				500000000	6.4	12		391
N:GEXP:DHX37:chr12:125431371:125473668:-:57647	DHX37	GEXP	12	125431371	125473668	N:MIRN:hsa-miR-126-5p:chr9:139565054:139565138:+:MIMAT0000444	hsa-miR-126-5p	MIRN	9	139565054	139565138	500000000	4.9	11.9	-0.32	481
N:GEXP:DHX37:chr12:125431371:125473668:-:57647	DHX37	GEXP	12	125431371	125473668	C:SAMP:mRNA_all_k1_4:::::	Gene Expression Cluster	SAMP				500000000	6.1	11.7		482
N:GEXP:DHX37:chr12:125431371:125473668:-:57647	DHX37	GEXP	12	125431371	125473668	B:SAMP:I(C3|NBS_k3):::::	NBS Cluster: 3	SAMP				500000000	4.9	11.4	0.36	368
N:GEXP:DHX37:chr12:125431371:125473668:-:57647	DHX37	GEXP	12	125431371	125473668	B:SAMP:I(C2|THCA-TP_miRseq_Mature_CC_3):::::	THCA-TP miRseq Mature CC 3: 2	SAMP				500000000	5	11.4	-0.32	481
N:GEXP:DHX37:chr12:125431371:125473668:-:57647	DHX37	GEXP	12	125431371	125473668	C:SAMP:THCA-TP_miRseq_Mature_CC_3:::::	THCA-TP miRseq Mature CC 3	SAMP				500000000	5.8	11.4		481
N:GEXP:DHX37:chr12:125431371:125473668:-:57647	DHX37	GEXP	12	125431371	125473668	N:RPPA:PRKAA1:chr5:40759481:40798297:-:AMPK_alpha_c	PRKAA1	RPPA	5	40759481	40798297	500000000	4.7	11.2	-0.35	357
N:GEXP:DHX37:chr12:125431371:125473668:-:57647	DHX37	GEXP	12	125431371	125473668	B:SAMP:I(C1,C3|NBS_k3):::::	NBS Cluster: 1 vs 3	SAMP				500000000	4.7	11.2	-0.38	330
N:GEXP:DHX37:chr12:125431371:125473668:-:57647	DHX37	GEXP	12	125431371	125473668	B:SAMP:I(C2|THCA-TP_miRseq_CC_3):::::	THCA-TP miRseq CC 3: 2	SAMP				500000000	4.8	11.2	-0.31	481
N:GEXP:DHX37:chr12:125431371:125473668:-:57647	DHX37	GEXP	12	125431371	125473668	C:SAMP:THCA-TP_miRseq_CC_3:::::	THCA-TP miRseq CC 3	SAMP				500000000	5.6	11.2		481
N:GEXP:DHX37:chr12:125431371:125473668:-:57647	DHX37	GEXP	12	125431371	125473668	N:RPPA:EIF4EBP1:chr8:37888020:37917883:+:4E-BP1_c	EIF4EBP1	RPPA	8	37888020	37917883	500000000	4.5	10.9	0.35	357
N:GEXP:DHX37:chr12:125431371:125473668:-:57647	DHX37	GEXP	12	125431371	125473668	N:MIRN:hsa-miR-338-5p:chr17:79099683:79099749:+:MIMAT0004701	hsa-miR-338-5p	MIRN	17	79099683	79099749	500000000	3.9	10.9	-0.3	481
N:GEXP:DHX37:chr12:125431371:125473668:-:57647	DHX37	GEXP	12	125431371	125473668	N:RPPA:PDCD4:chr10:112631553:112659764:+:PDCD4_c	PDCD4	RPPA	10	112631553	112659764	500000000	4.4	10.9	-0.35	357
N:GEXP:DHX37:chr12:125431371:125473668:-:57647	DHX37	GEXP	12	125431371	125473668	C:SAMP:NBS_k3:::::	NBS Cluster	SAMP				500000000	5.3	10.9		368
N:GEXP:DHX37:chr12:125431371:125473668:-:57647	DHX37	GEXP	12	125431371	125473668	B:SAMP:I(C1,C3|THCA-TP_meth_CNMF_3):::::	THCA-TP meth CNMF 3: 1 vs 3	SAMP				500000000	4.3	10.7	-0.33	405
N:GEXP:DHX37:chr12:125431371:125473668:-:57647	DHX37	GEXP	12	125431371	125473668	N:SAMP:BRAF_RAS_nSCORE:::::	BRAF-RAS Score	SAMP				500000000	4.8	10.6	-0.33	391
N:GEXP:DHX37:chr12:125431371:125473668:-:57647	DHX37	GEXP	12	125431371	125473668	N:MIRN:hsa-miR-375:chr2:219866367:219866430:+:MIMAT0000728	hsa-miR-375	MIRN	2	219866367	219866430	500000000	3.4	10.4	0.3	481
N:GEXP:DHX37:chr12:125431371:125473668:-:57647	DHX37	GEXP	12	125431371	125473668	N:MIRN:hsa-miR-146b-3p:chr10:104196269:104196341:+:MIMAT0004766	hsa-miR-146b-3p	MIRN	10	104196269	104196341	500000000	3.4	10.4	0.3	481
N:GEXP:DHX37:chr12:125431371:125473668:-:57647	DHX37	GEXP	12	125431371	125473668	N:SAMP:BRAF_cluster_numeric:::::	BRAF Cluster (Numeric)	SAMP				500000000	4.6	10.4	0.33	391
N:GEXP:DHX37:chr12:125431371:125473668:-:57647	DHX37	GEXP	12	125431371	125473668	N:MIRN:hsa-miR-22-5p:chr17:1617197:1617281:+:MIMAT0004495	hsa-miR-22-5p	MIRN	17	1617197	1617281	500000000	3.3	10.3	-0.29	481
N:GEXP:DHX37:chr12:125431371:125473668:-:57647	DHX37	GEXP	12	125431371	125473668	B:SAMP:I(C2,C3|THCA-TP_miRseq_Mature_CC_3):::::	THCA-TP miRseq Mature CC 3: 2 vs 3	SAMP				500000000	3.9	10.3	-0.38	293
N:GEXP:DHX37:chr12:125431371:125473668:-:57647	DHX37	GEXP	12	125431371	125473668	N:MIRN:hsa-miR-940:chr16:2321748:2321841:+:MIMAT0004983	hsa-miR-940	MIRN	16	2321748	2321841	500000000	3.1	10.2	-0.29	481
N:GEXP:DHX37:chr12:125431371:125473668:-:57647	DHX37	GEXP	12	125431371	125473668	C:SAMP:THCA-TP_meth_CNMF_3:::::	THCA-TP meth CNMF 3	SAMP				500000000	4.5	10.1		482
N:GEXP:DHX37:chr12:125431371:125473668:-:57647	DHX37	GEXP	12	125431371	125473668	N:MIRN:hsa-miR-126-3p:chr9:139565054:139565138:+:MIMAT0000445	hsa-miR-126-3p	MIRN	9	139565054	139565138	500000000	3	10	-0.29	481
N:GEXP:DHX37:chr12:125431371:125473668:-:57647	DHX37	GEXP	12	125431371	125473668	B:SAMP:I(C1|THCA-TP_meth_CNMF_3):::::	THCA-TP meth CNMF 3: 1	SAMP				500000000	3.6	10	-0.3	482
N:GEXP:DHX37:chr12:125431371:125473668:-:57647	DHX37	GEXP	12	125431371	125473668	B:SAMP:I(C1|NBS_k3):::::	NBS Cluster: 1	SAMP				500000000	3.5	9.9	-0.34	368
N:GEXP:DHX37:chr12:125431371:125473668:-:57647	DHX37	GEXP	12	125431371	125473668	C:SAMP:SuperCluster_k2:::::	SuperCluster	SAMP				500000000	4.2	9.8	-0.32	391
N:GEXP:DHX37:chr12:125431371:125473668:-:57647	DHX37	GEXP	12	125431371	125473668	B:SAMP:I(C0,C1|BRAF_cluster):::::	BRAF Cluster: No BRAF vs BRAF no driver	SAMP				500000000	3.4	9.8	-0.4	264
N:GEXP:DHX37:chr12:125431371:125473668:-:57647	DHX37	GEXP	12	125431371	125473668	B:SAMP:I(BRAF|SuperCluster_k2):::::	SuperCluster: BRAF	SAMP				500000000	3.4	9.8	0.32	391
N:GEXP:DHX37:chr12:125431371:125473668:-:57647	DHX37	GEXP	12	125431371	125473668	B:SAMP:I(RAS|SuperCluster_k2):::::	SuperCluster: RAS	SAMP				500000000	3.4	9.8	-0.32	391
N:GEXP:DHX37:chr12:125431371:125473668:-:57647	DHX37	GEXP	12	125431371	125473668	B:SAMP:I(C1,C2|THCA-TP_miRseq_CC_3):::::	THCA-TP miRseq CC 3: 1 vs 2	SAMP				500000000	3.3	9.7	0.38	284
N:GEXP:DHX37:chr12:125431371:125473668:-:57647	DHX37	GEXP	12	125431371	125473668	B:SAMP:I(C1,C5|mRNA_all_k1_4):::::	Gene Expression Cluster: 1 vs 5	SAMP				500000000	3.2	9.6	-0.41	240
N:GEXP:DHX37:chr12:125431371:125473668:-:57647	DHX37	GEXP	12	125431371	125473668	N:MIRN:hsa-miR-28-5p:chr3:188406569:188406654:+:MIMAT0000085	hsa-miR-28-5p	MIRN	3	188406569	188406654	500000000	2.4	9.4	-0.28	481
N:GEXP:DHX37:chr12:125431371:125473668:-:57647	DHX37	GEXP	12	125431371	125473668	N:MIRN:hsa-miR-1179:chr15:89151338:89151428:+:MIMAT0005824	hsa-miR-1179	MIRN	15	89151338	89151428	500000000	2.3	9.3	-0.28	481
N:GEXP:DHX37:chr12:125431371:125473668:-:57647	DHX37	GEXP	12	125431371	125473668	N:RPPA:PRRT2:chr16:29823409:29827202:+:PKC-pan_BetaII_pS660_c	PRRT2 (pS660, pc)	RPPA	16	29823409	29827202	500000000	2.9	9.3	-0.32	357
N:GEXP:DHX37:chr12:125431371:125473668:-:57647	DHX37	GEXP	12	125431371	125473668	B:SAMP:I(C1|THCA-TP_miRseq_CNMF_3):::::	THCA-TP miRseq CNMF 3: 1	SAMP				500000000	2.9	9.3	-0.28	481
N:GEXP:DHX37:chr12:125431371:125473668:-:57647	DHX37	GEXP	12	125431371	125473668	B:SAMP:I(C0,C2|BRAF_cluster):::::	BRAF Cluster: No BRAF vs BRAF plus driver	SAMP				500000000	2.9	9.3	-0.37	277
N:GEXP:DHX37:chr12:125431371:125473668:-:57647	DHX37	GEXP	12	125431371	125473668	N:RPPA:BAD:chr11:64037300:64052176:-:Bad_pS112_c	BAD (pS112, pc)	RPPA	11	64037300	64052176	500000000	2.7	9.2	-0.32	357
N:GEXP:DHX37:chr12:125431371:125473668:-:57647	DHX37	GEXP	12	125431371	125473668	N:MIRN:hsa-miR-130b-3p:chr22:22007593:22007674:+:MIMAT0000691	hsa-miR-130b-3p	MIRN	22	22007593	22007674	500000000	2.1	9.1	-0.28	481
N:GEXP:DHX37:chr12:125431371:125473668:-:57647	DHX37	GEXP	12	125431371	125473668	N:MIRN:hsa-miR-1180:chr17:19247819:19247887:+:MIMAT0005825	hsa-miR-1180	MIRN	17	19247819	19247887	500000000	2.1	9.1	-0.28	481
N:GEXP:DHX37:chr12:125431371:125473668:-:57647	DHX37	GEXP	12	125431371	125473668	C:SAMP:Meth_k4:::::	DNA Methylation Cluster	SAMP				500000000	3.4	9		482
N:GEXP:DHX37:chr12:125431371:125473668:-:57647	DHX37	GEXP	12	125431371	125473668	B:SAMP:I(C3|THCA-TP_meth_CNMF_3):::::	THCA-TP meth CNMF 3: 3	SAMP				500000000	2.6	9	0.28	482
N:GEXP:DHX37:chr12:125431371:125473668:-:57647	DHX37	GEXP	12	125431371	125473668	B:SAMP:I(C1,C3|mRNA_all_k1_4):::::	Gene Expression Cluster: 1 vs 3	SAMP				500000000	2.4	8.9	-0.41	216
N:GEXP:DHX37:chr12:125431371:125473668:-:57647	DHX37	GEXP	12	125431371	125473668	B:SAMP:I(C1|THCA-TP_miRseq_Mature_CNMF_3):::::	THCA-TP miRseq Mature CNMF 3: 1	SAMP				500000000	2.4	8.8	-0.28	481
N:GEXP:DHX37:chr12:125431371:125473668:-:57647	DHX37	GEXP	12	125431371	125473668	N:SAMP:thyroid_diff_score:::::	Thyroid Differentiation Score	SAMP				500000000	2.9	8.7	-0.3	391
N:GEXP:DHX37:chr12:125431371:125473668:-:57647	DHX37	GEXP	12	125431371	125473668	C:SAMP:miRNA_k6:::::	MicroRNA Cluster	SAMP				500000000	3	8.6		481
N:GEXP:DHX37:chr12:125431371:125473668:-:57647	DHX37	GEXP	12	125431371	125473668	C:SAMP:THCA-TP_miRseq_CNMF_3:::::	THCA-TP miRseq CNMF 3	SAMP				500000000	2.9	8.5		481
N:GEXP:DHX37:chr12:125431371:125473668:-:57647	DHX37	GEXP	12	125431371	125473668	B:SAMP:I(C1|miRNA_k6):::::	MicroRNA Cluster: 1	SAMP				500000000	2.1	8.5	-0.27	481
N:GEXP:DHX37:chr12:125431371:125473668:-:57647	DHX37	GEXP	12	125431371	125473668	B:SAMP:I(C2,C3|THCA-TP_miRseq_CC_3):::::	THCA-TP miRseq CC 3: 2 vs 3	SAMP				500000000	1.9	8.3	-0.32	329
N:GEXP:DHX37:chr12:125431371:125473668:-:57647	DHX37	GEXP	12	125431371	125473668	B:SAMP:I(C1,C5|miRNA_k6):::::	MicroRNA Cluster: 1 vs 5	SAMP				500000000	1.9	8.3	-0.42	194
N:GEXP:DHX37:chr12:125431371:125473668:-:57647	DHX37	GEXP	12	125431371	125473668	C:SAMP:THCA-TP_miRseq_Mature_CNMF_3:::::	THCA-TP miRseq Mature CNMF 3	SAMP				500000000	2.7	8.3		481
N:GEXP:DHX37:chr12:125431371:125473668:-:57647	DHX37	GEXP	12	125431371	125473668	B:SAMP:I(C1,C3|THCA-TP_mRNAseq_CNMF_4):::::	THCA-TP mRNAseq CNMF 4: 1 vs 3	SAMP				500000000	1.9	8.3	-0.36	266
N:GEXP:DHX37:chr12:125431371:125473668:-:57647	DHX37	GEXP	12	125431371	125473668	B:SAMP:I(C1,C2|THCA-TP_miRseq_Mature_CC_3):::::	THCA-TP miRseq Mature CC 3: 1 vs 2	SAMP				500000000	1.8	8.2	0.33	318
N:GEXP:DHX37:chr12:125431371:125473668:-:57647	DHX37	GEXP	12	125431371	125473668	B:SAMP:I(C2|THCA-TP_RPPA_CC_3):::::	THCA-TP RPPA CC 3: 2	SAMP				500000000	1.4	7.9	-0.3	355
N:GEXP:DHX37:chr12:125431371:125473668:-:57647	DHX37	GEXP	12	125431371	125473668	B:SAMP:I(C1,C2|THCA-TP_miRseq_Mature_CNMF_3):::::	THCA-TP miRseq Mature CNMF 3: 1 vs 2	SAMP				500000000	1.5	7.9	-0.32	327
N:GEXP:DHX37:chr12:125431371:125473668:-:57647	DHX37	GEXP	12	125431371	125473668	N:SAMP:THCA-TP_meth_CNMF_3_sv:::::	THCA-TP meth CNMF 3 sv	SAMP				500000000	2	7.8	-0.25	482
N:GEXP:DHX37:chr12:125431371:125473668:-:57647	DHX37	GEXP	12	125431371	125473668	B:SAMP:I(classical_2|Meth_k4):::::	DNA Methylation Cluster: Classical 2	SAMP				500000000	1.4	7.8	0.26	482
N:GEXP:DHX37:chr12:125431371:125473668:-:57647	DHX37	GEXP	12	125431371	125473668	B:SAMP:I(C2|THCA-TP_mRNAseq_CC_4):::::	THCA-TP mRNAseq CC 4: 2	SAMP				500000000	1.2	7.7	0.25	482
N:GEXP:DHX37:chr12:125431371:125473668:-:57647	DHX37	GEXP	12	125431371	125473668	N:RPPA:MAPK14:chr6:35995454:36079013:+:p38_pT180_Y182_c	MAPK14 (pT180, pY182, pc)	RPPA	6	35995454	36079013	500000000	1.2	7.6	-0.29	357
N:GEXP:DHX37:chr12:125431371:125473668:-:57647	DHX37	GEXP	12	125431371	125473668	N:RPPA:GSK3A:chr19:42734338:42746736:-:GSK3-alpha-beta_pS21_S9_c	GSK3A (pS21, pS9, pc)	RPPA	19	42734338	42746736	500000000	1.1	7.6	-0.29	357
N:CNVR:10q26:chr10:124578000:135225000::	chr10:124,578,000-135,225,000 (11bp, 10q26)	CNVR	10	124578000	135225000	N:GEXP:DHX37:chr12:125431371:125473668:-:57647	DHX37	GEXP	12	125431371	125473668	500000000	0.5	7.6	-0.25	480
N:GEXP:DHX37:chr12:125431371:125473668:-:57647	DHX37	GEXP	12	125431371	125473668	B:SAMP:I(C1,C2|THCA-TP_miRseq_CNMF_3):::::	THCA-TP miRseq CNMF 3: 1 vs 2	SAMP				500000000	1.2	7.6	-0.31	319
N:GEXP:DHX37:chr12:125431371:125473668:-:57647	DHX37	GEXP	12	125431371	125473668	N:RPPA:RAF1:chr3:12625100:12705700:-:C-Raf_c	RAF1	RPPA	3	12625100	12705700	500000000	1	7.4	-0.29	357
N:CNVR:10q25.1:chr10:102537000:111611999::	chr10:102,537,000-111,611,999 (9bp, 10q25.1)	CNVR	10	102537000	111611999	N:GEXP:DHX37:chr12:125431371:125473668:-:57647	DHX37	GEXP	12	125431371	125473668	500000000	0.1	7.2	-0.24	480
N:GEXP:DHX37:chr12:125431371:125473668:-:57647	DHX37	GEXP	12	125431371	125473668	N:RPPA:CHEK2:chr22:29083731:29137822:-:Chk2_c	CHEK2	RPPA	22	29083731	29137822	500000000	0.8	7.2	0.28	357
N:CNVR:10p14:chr10:9496000:12419999::	chr10:9,496,000-12,419,999 (3bp, 10p14)	CNVR	10	9496000	12419999	N:GEXP:DHX37:chr12:125431371:125473668:-:57647	DHX37	GEXP	12	125431371	125473668	500000000	0	7.1	-0.24	480
N:GEXP:DHX37:chr12:125431371:125473668:-:57647	DHX37	GEXP	12	125431371	125473668	C:SAMP:THCA-TP_RPPA_CC_3:::::	THCA-TP RPPA CC 3	SAMP				500000000	1.5	7.1		355
N:GEXP:DHX37:chr12:125431371:125473668:-:57647	DHX37	GEXP	12	125431371	125473668	N:RPPA:BECN1:chr17:40962150:40976310:-:Beclin_c	BECN1	RPPA	17	40962150	40976310	500000000	0.5	7	0.28	357
N:GEXP:DHX37:chr12:125431371:125473668:-:57647	DHX37	GEXP	12	125431371	125473668	N:RPPA:FN1:chr2:216225179:216300791:-:Fibronectin_c	FN1	RPPA	2	216225179	216300791	500000000	0.4	6.9	0.27	357
N:GEXP:DHX37:chr12:125431371:125473668:-:57647	DHX37	GEXP	12	125431371	125473668	B:SAMP:I(C1,C3|THCA-TP_miRseq_CNMF_3):::::	THCA-TP miRseq CNMF 3: 1 vs 3	SAMP				500000000	0.5	6.9	-0.3	313
N:GEXP:DHX37:chr12:125431371:125473668:-:57647	DHX37	GEXP	12	125431371	125473668	B:SAMP:I(classical_2,follicular|Meth_k4):::::	DNA Methylation Cluster: Classical 2 vs Follicular	SAMP				500000000	0.5	6.9	0.26	414
N:GEXP:DHX37:chr12:125431371:125473668:-:57647	DHX37	GEXP	12	125431371	125473668	B:SAMP:I(C2,C3|THCA-TP_RPPA_CC_3):::::	THCA-TP RPPA CC 3: 2 vs 3	SAMP				500000000	0.5	6.9	-0.3	319
N:GEXP:DHX37:chr12:125431371:125473668:-:57647	DHX37	GEXP	12	125431371	125473668	N:RPPA:INPP4B:chr4:142949182:143767604:-:INPP4B_c	INPP4B	RPPA	4	142949182	143767604	500000000	0.4	6.8	0.27	357
N:CNVR:10p12.1:chr10:12425000:31973999::	chr10:12,425,000-31,973,999 (20bp, 10p12.1)	CNVR	10	12425000	31973999	N:GEXP:DHX37:chr12:125431371:125473668:-:57647	DHX37	GEXP	12	125431371	125473668	500000000	0	6.8	-0.24	480
N:CNVR:10q26.13:chr10:124577000:124577999::	chr10:124,577,000-124,577,999 (100kb, 10q26.13)	CNVR	10	124577000	124577999	N:GEXP:DHX37:chr12:125431371:125473668:-:57647	DHX37	GEXP	12	125431371	125473668	500000000	0	6.8	-0.24	480
N:CNVR:10q25.1:chr10:111612000:111614999::	chr10:111,612,000-111,614,999 (3Mb, 10q25.1)	CNVR	10	111612000	111614999	N:GEXP:DHX37:chr12:125431371:125473668:-:57647	DHX37	GEXP	12	125431371	125473668	500000000	0	6.8	-0.24	480
N:CNVR:6q14.1:chr6:49696000:107002999::	chr6:49,696,000-107,002,999 (57bp, 6q14.1)	CNVR	6	49696000	107002999	N:GEXP:DHX37:chr12:125431371:125473668:-:57647	DHX37	GEXP	12	125431371	125473668	500000000	0	6.8	-0.24	480
N:GEXP:DHX37:chr12:125431371:125473668:-:57647	DHX37	GEXP	12	125431371	125473668	C:SAMP:RPPA_k4:::::	RPPA Cluster	SAMP				500000000	1.2	6.8		357
N:GEXP:DHX37:chr12:125431371:125473668:-:57647	DHX37	GEXP	12	125431371	125473668	N:RPPA:GSK3A:chr19:42734338:42746736:-:GSK3_pS9_c	GSK3A (pS9, pc)	RPPA	19	42734338	42746736	500000000	0.2	6.7	-0.27	357
N:CNVR:10p11.21:chr10:31975000:43523999::	chr10:31,975,000-43,523,999 (12bp, 10p11.21)	CNVR	10	31975000	43523999	N:GEXP:DHX37:chr12:125431371:125473668:-:57647	DHX37	GEXP	12	125431371	125473668	500000000	0	6.7	-0.24	480
N:GEXP:DHX37:chr12:125431371:125473668:-:57647	DHX37	GEXP	12	125431371	125473668	B:SAMP:I(C1,C6|miRNA_k6):::::	MicroRNA Cluster: 1 vs 6	SAMP				500000000	0.3	6.7	-0.32	261
N:CNVR:15q11.2:chr15:23687000:26218999::	chr15:23,687,000-26,218,999 (3bp, 15q11.2)	CNVR	15	23687000	26218999	N:GEXP:DHX37:chr12:125431371:125473668:-:57647	DHX37	GEXP	12	125431371	125473668	500000000	0	6.6	-0.23	480
N:GEXP:DHX37:chr12:125431371:125473668:-:57647	DHX37	GEXP	12	125431371	125473668	N:RPPA:FOXO3:chr6:108881026:109005971:+:FOXO3a_c	FOXO3	RPPA	6	108881026	109005971	500000000	0.2	6.6	0.27	357
N:GEXP:DHX37:chr12:125431371:125473668:-:57647	DHX37	GEXP	12	125431371	125473668	B:SAMP:I(C1|RPPA_k4):::::	RPPA Cluster: 1	SAMP				500000000	0.2	6.6	-0.27	357
N:GEXP:DHX37:chr12:125431371:125473668:-:57647	DHX37	GEXP	12	125431371	125473668	N:RPPA:ANXA7:chr10:75135189:75173841:-:Annexin_VII_c	ANXA7	RPPA	10	75135189	75173841	500000000	0.1	6.5	0.27	357
N:CNVR:18q11.2:chr18:24886000:24889999::	chr18:24,886,000-24,889,999 (4Mb, 18q11.2)	CNVR	18	24886000	24889999	N:GEXP:DHX37:chr12:125431371:125473668:-:57647	DHX37	GEXP	12	125431371	125473668	500000000	0	6.5	-0.23	480
N:CNVR:10p11.22:chr10:31974000:31974999::	chr10:31,974,000-31,974,999 (100kb, 10p11.22)	CNVR	10	31974000	31974999	N:GEXP:DHX37:chr12:125431371:125473668:-:57647	DHX37	GEXP	12	125431371	125473668	500000000	0	6.5	-0.23	480
N:CNVR:10q25.3:chr10:111615000:124576999::	chr10:111,615,000-124,576,999 (13bp, 10q25.3)	CNVR	10	111615000	124576999	N:GEXP:DHX37:chr12:125431371:125473668:-:57647	DHX37	GEXP	12	125431371	125473668	500000000	0	6.4	-0.23	480
N:GEXP:DHX37:chr12:125431371:125473668:-:57647	DHX37	GEXP	12	125431371	125473668	N:RPPA:VHL:chr3:10183319:10195354:+:VHL_c	VHL	RPPA	3	10183319	10195354	500000000	0	6.4	0.26	357
N:CNVR:10q11.21:chr10:43524000:43525999::	chr10:43,524,000-43,525,999 (2Mb, 10q11.21)	CNVR	10	43524000	43525999	N:GEXP:DHX37:chr12:125431371:125473668:-:57647	DHX37	GEXP	12	125431371	125473668	500000000	0	6.4	-0.23	480
N:GEXP:DHX37:chr12:125431371:125473668:-:57647	DHX37	GEXP	12	125431371	125473668	B:SAMP:I(C4|THCA-TP_mRNAseq_CNMF_4):::::	THCA-TP mRNAseq CNMF 4: 4	SAMP				500000000	0	6.4	0.23	482
N:CNVR:9q31.2:chr9:110326000:110326999::	chr9:110,326,000-110,326,999 (100kb, 9q31.2)	CNVR	9	110326000	110326999	N:GEXP:DHX37:chr12:125431371:125473668:-:57647	DHX37	GEXP	12	125431371	125473668	500000000	0	6.3	-0.23	480
N:CNVR:10p13:chr10:12420000:12424999::	chr10:12,420,000-12,424,999 (5Mb, 10p13)	CNVR	10	12420000	12424999	N:GEXP:DHX37:chr12:125431371:125473668:-:57647	DHX37	GEXP	12	125431371	125473668	500000000	0	6.3	-0.23	480
N:CNVR:15q12:chr15:26219000:26219999::	chr15:26,219,000-26,219,999 (100kb, 15q12)	CNVR	15	26219000	26219999	N:GEXP:DHX37:chr12:125431371:125473668:-:57647	DHX37	GEXP	12	125431371	125473668	500000000	0	6.2	-0.23	480
N:CNVR:2p23.3:chr2:26710000:26710999::	chr2:26,710,000-26,710,999 (100kb, 2p23.3)	CNVR	2	26710000	26710999	N:GEXP:DHX37:chr12:125431371:125473668:-:57647	DHX37	GEXP	12	125431371	125473668	500000000	0	6.2	-0.23	480
N:CNVR:18q12.1:chr18:29973000:29980999::	chr18:29,973,000-29,980,999 (8Mb, 18q12.1)	CNVR	18	29973000	29980999	N:GEXP:DHX37:chr12:125431371:125473668:-:57647	DHX37	GEXP	12	125431371	125473668	500000000	0	6.2	-0.22	480
N:CNVR:15q26.1:chr15:91743000:93628999::	chr15:91,743,000-93,628,999 (2bp, 15q26.1)	CNVR	15	91743000	93628999	N:GEXP:DHX37:chr12:125431371:125473668:-:57647	DHX37	GEXP	12	125431371	125473668	500000000	0	6.2	-0.23	480
N:CNVR:2p16.1:chr2:26711000:70942999::	chr2:26,711,000-70,942,999 (44bp, 2p16.1)	CNVR	2	26711000	70942999	N:GEXP:DHX37:chr12:125431371:125473668:-:57647	DHX37	GEXP	12	125431371	125473668	500000000	0	6.1	-0.22	480
N:CNVR:10p14:chr10:1415000:9495999::	chr10:1,415,000-9,495,999 (8bp, 10p14)	CNVR	10	1415000	9495999	N:GEXP:DHX37:chr12:125431371:125473668:-:57647	DHX37	GEXP	12	125431371	125473668	500000000	0	6.1	-0.22	480
N:CNVR:2p24.1:chr2:18248000:26709999::	chr2:18,248,000-26,709,999 (8bp, 2p24.1)	CNVR	2	18248000	26709999	N:GEXP:DHX37:chr12:125431371:125473668:-:57647	DHX37	GEXP	12	125431371	125473668	500000000	0	6.1	-0.22	480
N:CNVR:10q23:chr10:84510000:95404999::	chr10:84,510,000-95,404,999 (11bp, 10q23)	CNVR	10	84510000	95404999	N:GEXP:DHX37:chr12:125431371:125473668:-:57647	DHX37	GEXP	12	125431371	125473668	500000000	0	6.1	-0.22	480
N:CNVR:15q26:chr15:93630000:96745999::	chr15:93,630,000-96,745,999 (3bp, 15q26)	CNVR	15	93630000	96745999	N:GEXP:DHX37:chr12:125431371:125473668:-:57647	DHX37	GEXP	12	125431371	125473668	500000000	0	6.1	-0.22	480
N:GEXP:DHX37:chr12:125431371:125473668:-:57647	DHX37	GEXP	12	125431371	125473668	B:SAMP:I(C1,C4|RPPA_k4):::::	RPPA Cluster: 1 vs 4	SAMP				500000000	0	6.1	-0.36	189
N:GEXP:DHX37:chr12:125431371:125473668:-:57647	DHX37	GEXP	12	125431371	125473668	B:SAMP:I(C3|THCA-TP_miRseq_Mature_CC_3):::::	THCA-TP miRseq Mature CC 3: 3	SAMP				500000000	0	6.1	0.23	481
N:GEXP:DHX37:chr12:125431371:125473668:-:57647	DHX37	GEXP	12	125431371	125473668	N:RPPA:YWHAE:chr17:1247834:1303556:-:14-3-3_epsilon_c	YWHAE	RPPA	17	1247834	1303556	500000000	0	6	0.26	357
N:CNVR:9p13.3:chr9:33006000:37947999::	chr9:33,006,000-37,947,999 (5bp, 9p13.3)	CNVR	9	33006000	37947999	N:GEXP:DHX37:chr12:125431371:125473668:-:57647	DHX37	GEXP	12	125431371	125473668	500000000	0	6	-0.22	480
N:GEXP:DHX37:chr12:125431371:125473668:-:57647	DHX37	GEXP	12	125431371	125473668	B:SAMP:I(C1,C3|THCA-TP_mRNAseq_CC_4):::::	THCA-TP mRNAseq CC 4: 1 vs 3	SAMP				500000000	0	6	-0.33	228
Table12.OV
id_a	pretty_label_a	datatype_a	chr_a	start_a	end_a	id_b	pretty_label_b	datatype_b	chr_b	start_b	end_b	link_distance	adj_logged_pvalue	logged_pvalue	correlation	num_nonna
N:GEXP:DHX37:chr12:125431370:125473667:-:	DHX37	GEXP	12	125431370	125473667	N:GEXP:PUS1:chr12:132413745:132428406:+:	PUS1	GEXP	12	132413745	132428406	6940078	48.6	56.6	0.598	574
N:GEXP:DDX51:chr12:132621140:132628880:-:	DDX51	GEXP	12	132621140	132628880	N:GEXP:DHX37:chr12:125431370:125473667:-:	DHX37	GEXP	12	125431370	125473667	7147473	48.6	56.5	0.598	574
N:GEXP:DHX37:chr12:125431370:125473667:-:	DHX37	GEXP	12	125431370	125473667	N:GEXP:SFSWAP:chr12:132195635:132284282:+:	SFSWAP	GEXP	12	132195635	132284282	6721968	39.4	47.4	0.555	574
N:GEXP:DHX37:chr12:125431370:125473667:-:	DHX37	GEXP	12	125431370	125473667	N:GEXP:YIPF5:chr5:143537729:143550278:-:	YIPF5	GEXP	5	143537729	143550278	500000000	35.7	43.6	-0.536	574
N:GEXP:DDX54:chr12:113594978:113623284:-:	DDX54	GEXP	12	113594978	113623284	N:GEXP:DHX37:chr12:125431370:125473667:-:	DHX37	GEXP	12	125431370	125473667	11808086	32.3	40.3	0.518	574
N:GEXP:DHX37:chr12:125431370:125473667:-:	DHX37	GEXP	12	125431370	125473667	N:GEXP:SCOC:chr4:141178440:141303710:+:	SCOC	GEXP	4	141178440	141303710	500000000	28.6	36.6	-0.496	574
N:GEXP:AAAS:chr12:53701240:53715412:-:	AAAS	GEXP	12	53701240	53715412	N:GEXP:DHX37:chr12:125431370:125473667:-:	DHX37	GEXP	12	125431370	125473667	71715958	27.8	35.7	0.491	574
N:GEXP:DHX37:chr12:125431370:125473667:-:	DHX37	GEXP	12	125431370	125473667	N:GEXP:MOB4:chr2:198380294:198418423:+:	MOB4	GEXP	2	198380294	198418423	500000000	27.5	35.5	-0.489	574
N:GEXP:DHX37:chr12:125431370:125473667:-:	DHX37	GEXP	12	125431370	125473667	N:GEXP:FBXO3:chr11:33762490:33796071:-:	FBXO3	GEXP	11	33762490	33796071	500000000	27.5	35.4	-0.489	574
N:GEXP:DHX37:chr12:125431370:125473667:-:	DHX37	GEXP	12	125431370	125473667	N:GEXP:RCHY1:chr4:76404247:76439640:-:	RCHY1	GEXP	4	76404247	76439640	500000000	27.3	35.2	-0.488	574
N:GEXP:DHX37:chr12:125431370:125473667:-:	DHX37	GEXP	12	125431370	125473667	N:GEXP:YIPF6:chrX:67718624:67757127:+:	YIPF6	GEXP	X	67718624	67757127	500000000	26.5	34.4	-0.483	574
N:CNVR:12q24.31:chr12:125155000:125157999::	chr12:125,155,000-125,157,999 (3Mb, 12q24.31)	CNVR	12	125155000	125157999	N:GEXP:DHX37:chr12:125431370:125473667:-:	DHX37	GEXP	12	125431370	125473667	273371	25.6	33.9	0.483	565
N:CNVR:12q24.31:chr12:125158000:125485999::	chr12:125,158,000-125,485,999 (328Mb, 12q24.31)	CNVR	12	125158000	125485999	N:GEXP:DHX37:chr12:125431370:125473667:-:	DHX37	GEXP	12	125431370	125473667	0	25.6	33.9	0.483	565
N:GEXP:DHX37:chr12:125431370:125473667:-:	DHX37	GEXP	12	125431370	125473667	N:GEXP:RBM7:chr11:114271384:114279635:+:	RBM7	GEXP	11	114271384	114279635	500000000	25.8	33.8	-0.479	574
N:CNVR:TMEM132B:chr12:125897000:125902999::	chr12:125,897,000-125,902,999 (6Mb, TMEM132B)	CNVR	12	125897000	125902999	N:GEXP:DHX37:chr12:125431370:125473667:-:	DHX37	GEXP	12	125431370	125473667	423333	25.3	33.6	0.481	565
N:CNVR:TMEM132B:chr12:125903000:126000999::	chr12:125,903,000-126,000,999 (98Mb, TMEM132B)	CNVR	12	125903000	126000999	N:GEXP:DHX37:chr12:125431370:125473667:-:	DHX37	GEXP	12	125431370	125473667	429333	25.2	33.5	0.48	565
N:CNVR:TMEM132B:chr12:125653000:125896999::	chr12:125,653,000-125,896,999 (244Mb, TMEM132B)	CNVR	12	125653000	125896999	N:GEXP:DHX37:chr12:125431370:125473667:-:	DHX37	GEXP	12	125431370	125473667	179333	25.1	33.4	0.48	565
N:CNVR:12q24.31:chr12:125487000:125640999::	chr12:125,487,000-125,640,999 (154Mb, 12q24.31)	CNVR	12	125487000	125640999	N:GEXP:DHX37:chr12:125431370:125473667:-:	DHX37	GEXP	12	125431370	125473667	13333	24.9	33.2	0.478	565
N:GEXP:DDX55:chr12:124086672:124105482:+:	DDX55	GEXP	12	124086672	124105482	N:GEXP:DHX37:chr12:125431370:125473667:-:	DHX37	GEXP	12	125431370	125473667	1325888	25.1	33.1	0.474	574
N:CNVR:12q24.32:chr12:126799000:126799999::	chr12:126,799,000-126,799,999 (100kb, 12q24.32)	CNVR	12	126799000	126799999	N:GEXP:DHX37:chr12:125431370:125473667:-:	DHX37	GEXP	12	125431370	125473667	1325333	24.7	33	0.477	565
N:CNVR:12q24.32:chr12:126001000:126798999::	chr12:126,001,000-126,798,999 (798Mb, 12q24.32)	CNVR	12	126001000	126798999	N:GEXP:DHX37:chr12:125431370:125473667:-:	DHX37	GEXP	12	125431370	125473667	527333	24.2	32.5	0.473	565
N:CNVR:12q24.32:chr12:127373000:127373999::	chr12:127,373,000-127,373,999 (100kb, 12q24.32)	CNVR	12	127373000	127373999	N:GEXP:DHX37:chr12:125431370:125473667:-:	DHX37	GEXP	12	125431370	125473667	1899333	24.2	32.5	0.473	565
N:CNVR:LOC100128554:chr12:126800000:126946999::	chr12:126,800,000-126,946,999 (147Mb, LOC100128554)	CNVR	12	126800000	126946999	N:GEXP:DHX37:chr12:125431370:125473667:-:	DHX37	GEXP	12	125431370	125473667	1326333	24.1	32.4	0.473	565
N:CNVR:12q24.32:chr12:127042000:127124999::	chr12:127,042,000-127,124,999 (83Mb, 12q24.32)	CNVR	12	127042000	127124999	N:GEXP:DHX37:chr12:125431370:125473667:-:	DHX37	GEXP	12	125431370	125473667	1568333	24.1	32.4	0.473	565
N:CNVR:12q24.32:chr12:127308000:127315999::	chr12:127,308,000-127,315,999 (8Mb, 12q24.32)	CNVR	12	127308000	127315999	N:GEXP:DHX37:chr12:125431370:125473667:-:	DHX37	GEXP	12	125431370	125473667	1834333	24.2	32.4	0.473	565
N:CNVR:LOC100128554:chr12:126951000:126993999::	chr12:126,951,000-126,993,999 (43Mb, LOC100128554)	CNVR	12	126951000	126993999	N:GEXP:DHX37:chr12:125431370:125473667:-:	DHX37	GEXP	12	125431370	125473667	1477333	24.1	32.4	0.473	565
N:CNVR:12q24.32:chr12:127131000:127307999::	chr12:127,131,000-127,307,999 (177Mb, 12q24.32)	CNVR	12	127131000	127307999	N:GEXP:DHX37:chr12:125431370:125473667:-:	DHX37	GEXP	12	125431370	125473667	1657333	24.1	32.4	0.473	565
N:CNVR:LOC440117:chr12:127316000:127372999::	chr12:127,316,000-127,372,999 (57Mb, LOC440117)	CNVR	12	127316000	127372999	N:GEXP:DHX37:chr12:125431370:125473667:-:	DHX37	GEXP	12	125431370	125473667	1842333	24.1	32.4	0.473	565
N:GEXP:DHX37:chr12:125431370:125473667:-:	DHX37	GEXP	12	125431370	125473667	N:GEXP:SGCB:chr4:52886861:52904485:-:	SGCB	GEXP	4	52886861	52904485	500000000	24.3	32.2	-0.469	574
N:CNVR:12q24.33:chr12:130864000:130864999::	chr12:130,864,000-130,864,999 (100kb, 12q24.33)	CNVR	12	130864000	130864999	N:GEXP:DHX37:chr12:125431370:125473667:-:	DHX37	GEXP	12	125431370	125473667	5390333	23.9	32.2	0.481	539
N:GEXP:DHX37:chr12:125431370:125473667:-:	DHX37	GEXP	12	125431370	125473667	N:GEXP:VPS37B:chr12:123349875:123380712:-:	VPS37B	GEXP	12	123349875	123380712	2050658	24.1	32	0.467	574
N:CNVR:12q24.31:chr12:124839000:125154999::	chr12:124,839,000-125,154,999 (316Mb, 12q24.31)	CNVR	12	124839000	125154999	N:GEXP:DHX37:chr12:125431370:125473667:-:	DHX37	GEXP	12	125431370	125473667	276371	23.5	31.7	0.468	565
N:CNVR:TMEM132D:chr12:130318000:130446999::	chr12:130,318,000-130,446,999 (129Mb, TMEM132D)	CNVR	12	130318000	130446999	N:GEXP:DHX37:chr12:125431370:125473667:-:	DHX37	GEXP	12	125431370	125473667	4844333	23.5	31.7	0.468	565
N:CNVR:12q24.32:chr12:127007000:127041999::	chr12:127,007,000-127,041,999 (35Mb, 12q24.32)	CNVR	12	127007000	127041999	N:GEXP:DHX37:chr12:125431370:125473667:-:	DHX37	GEXP	12	125431370	125473667	1533333	23.4	31.7	0.468	565
N:CNVR:TMEM132D:chr12:130147000:130314999::	chr12:130,147,000-130,314,999 (168Mb, TMEM132D)	CNVR	12	130147000	130314999	N:GEXP:DHX37:chr12:125431370:125473667:-:	DHX37	GEXP	12	125431370	125473667	4673333	23.2	31.5	0.467	565
N:CNVR:BC032874:chr12:127374000:127584999::	chr12:127,374,000-127,584,999 (211Mb, BC032874)	CNVR	12	127374000	127584999	N:GEXP:DHX37:chr12:125431370:125473667:-:	DHX37	GEXP	12	125431370	125473667	1900333	23.3	31.5	0.467	565
N:CNVR:12q24.32:chr12:127125000:127130999::	chr12:127,125,000-127,130,999 (6Mb, 12q24.32)	CNVR	12	127125000	127130999	N:GEXP:DHX37:chr12:125431370:125473667:-:	DHX37	GEXP	12	125431370	125473667	1651333	23.1	31.4	0.466	565
N:CNVR:TMEM132C:chr12:129165000:129228999::	chr12:129,165,000-129,228,999 (64Mb, TMEM132C)	CNVR	12	129165000	129228999	N:GEXP:DHX37:chr12:125431370:125473667:-:	DHX37	GEXP	12	125431370	125473667	3691333	22.9	31.2	0.465	565
N:CNVR:LOC100128554:chr12:126947000:126949999::	chr12:126,947,000-126,949,999 (3Mb, LOC100128554)	CNVR	12	126947000	126949999	N:GEXP:DHX37:chr12:125431370:125473667:-:	DHX37	GEXP	12	125431370	125473667	1473333	22.8	31.1	0.464	565
N:CNVR:12q24.32:chr12:127635000:128650999::	chr12:127,635,000-128,650,999 (1bp, 12q24.32)	CNVR	12	127635000	128650999	N:GEXP:DHX37:chr12:125431370:125473667:-:	DHX37	GEXP	12	125431370	125473667	2161333	22.6	30.9	0.463	565
N:GEXP:DHX37:chr12:125431370:125473667:-:	DHX37	GEXP	12	125431370	125473667	N:GEXP:ZFAND6:chr15:80351910:80430735:+:	ZFAND6	GEXP	15	80351910	80430735	500000000	22.8	30.8	-0.458	574
N:CNVR:12q24.3:chr12:129233000:129458999::	chr12:129,233,000-129,458,999 (226Mb, 12q24.3)	CNVR	12	129233000	129458999	N:GEXP:DHX37:chr12:125431370:125473667:-:	DHX37	GEXP	12	125431370	125473667	3759333	22.5	30.8	0.462	565
N:CNVR:12q24.32:chr12:127005000:127006999::	chr12:127,005,000-127,006,999 (2Mb, 12q24.32)	CNVR	12	127005000	127006999	N:GEXP:DHX37:chr12:125431370:125473667:-:	DHX37	GEXP	12	125431370	125473667	1531333	22.4	30.7	0.467	549
N:CNVR:12q24.33:chr12:130451000:130511999::	chr12:130,451,000-130,511,999 (61Mb, 12q24.33)	CNVR	12	130451000	130511999	N:GEXP:DHX37:chr12:125431370:125473667:-:	DHX37	GEXP	12	125431370	125473667	4977333	22.3	30.6	0.46	565
N:CNVR:RIMBP2:chr12:130865000:130891999::	chr12:130,865,000-130,891,999 (27Mb, RIMBP2)	CNVR	12	130865000	130891999	N:GEXP:DHX37:chr12:125431370:125473667:-:	DHX37	GEXP	12	125431370	125473667	5391333	22.3	30.6	0.46	565
N:CNVR:12q24.32:chr12:127585000:127633999::	chr12:127,585,000-127,633,999 (49Mb, 12q24.32)	CNVR	12	127585000	127633999	N:GEXP:DHX37:chr12:125431370:125473667:-:	DHX37	GEXP	12	125431370	125473667	2111333	22.3	30.6	0.46	565
N:CNVR:PIWIL1:chr12:130824000:130861999::	chr12:130,824,000-130,861,999 (38Mb, PIWIL1)	CNVR	12	130824000	130861999	N:GEXP:DHX37:chr12:125431370:125473667:-:	DHX37	GEXP	12	125431370	125473667	5350333	22.4	30.6	0.461	565
N:GEXP:DHX37:chr12:125431370:125473667:-:	DHX37	GEXP	12	125431370	125473667	N:GEXP:GNG10:chr9:114423850:114432526:+:	GNG10	GEXP	9	114423850	114432526	500000000	22.5	30.5	-0.456	574
N:CNVR:TMEM132D:chr12:130004000:130144999::	chr12:130,004,000-130,144,999 (141Mb, TMEM132D)	CNVR	12	130004000	130144999	N:GEXP:DHX37:chr12:125431370:125473667:-:	DHX37	GEXP	12	125431370	125473667	4530333	22.2	30.5	0.46	565
N:CNVR:12q24.33:chr12:129462000:129877999::	chr12:129,462,000-129,877,999 (416Mb, 12q24.33)	CNVR	12	129462000	129877999	N:GEXP:DHX37:chr12:125431370:125473667:-:	DHX37	GEXP	12	125431370	125473667	3988333	22.2	30.4	0.46	565
N:CNVR:TMEM132D:chr12:130315000:130317999::	chr12:130,315,000-130,317,999 (3Mb, TMEM132D)	CNVR	12	130315000	130317999	N:GEXP:DHX37:chr12:125431370:125473667:-:	DHX37	GEXP	12	125431370	125473667	4841333	22.1	30.3	0.459	565
N:CNVR:BRI3BP:chr12:125486000:125486999::	chr12:125,486,000-125,486,999 (100kb, BRI3BP)	CNVR	12	125486000	125486999	N:GEXP:DHX37:chr12:125431370:125473667:-:	DHX37	GEXP	12	125431370	125473667	12333	22.1	30.3	0.459	565
N:CNVR:LOC100128554:chr12:126950000:126950999::	chr12:126,950,000-126,950,999 (100kb, LOC100128554)	CNVR	12	126950000	126950999	N:GEXP:DHX37:chr12:125431370:125473667:-:	DHX37	GEXP	12	125431370	125473667	1476333	21.9	30.2	0.458	565
N:GEXP:DHX37:chr12:125431370:125473667:-:	DHX37	GEXP	12	125431370	125473667	N:GEXP:PHACTR4:chr1:28696093:28826881:+:	PHACTR4	GEXP	1	28696093	28826881	500000000	22.2	30.2	0.454	574
N:GEXP:CRBN:chr3:3191317:3221401:-:	CRBN	GEXP	3	3191317	3221401	N:GEXP:DHX37:chr12:125431370:125473667:-:	DHX37	GEXP	12	125431370	125473667	500000000	22	30	-0.453	574
N:GEXP:C14ORF129:chr14:96829863:96853563:+:	C14ORF129	GEXP	14	96829863	96853563	N:GEXP:DHX37:chr12:125431370:125473667:-:	DHX37	GEXP	12	125431370	125473667	500000000	22	30	-0.453	574
N:CNVR:TMEM132D:chr12:129878000:130002999::	chr12:129,878,000-130,002,999 (125Mb, TMEM132D)	CNVR	12	129878000	130002999	N:GEXP:DHX37:chr12:125431370:125473667:-:	DHX37	GEXP	12	125431370	125473667	4404333	21.7	30	0.456	565
N:CNVR:12q24.33:chr12:131617000:131727999::	chr12:131,617,000-131,727,999 (111Mb, 12q24.33)	CNVR	12	131617000	131727999	N:GEXP:DHX37:chr12:125431370:125473667:-:	DHX37	GEXP	12	125431370	125473667	6143333	21.7	29.9	0.456	565
N:GEXP:DCK:chr4:71859265:71896629:+:	DCK	GEXP	4	71859265	71896629	N:GEXP:DHX37:chr12:125431370:125473667:-:	DHX37	GEXP	12	125431370	125473667	500000000	21.9	29.8	-0.452	574
N:GEXP:DHX37:chr12:125431370:125473667:-:	DHX37	GEXP	12	125431370	125473667	N:GEXP:SETD1B:chr12:122242638:122270562:+:	SETD1B	GEXP	12	122242638	122270562	3160808	21.9	29.8	0.452	574
N:CNVR:TMEM132C:chr12:128804000:129163999::	chr12:128,804,000-129,163,999 (360Mb, TMEM132C)	CNVR	12	128804000	129163999	N:GEXP:DHX37:chr12:125431370:125473667:-:	DHX37	GEXP	12	125431370	125473667	3330333	21.4	29.7	0.454	565
N:CNVR:12q24.31:chr12:125641000:125641999::	chr12:125,641,000-125,641,999 (100kb, 12q24.31)	CNVR	12	125641000	125641999	N:GEXP:DHX37:chr12:125431370:125473667:-:	DHX37	GEXP	12	125431370	125473667	167333	21.4	29.7	0.454	565
N:CNVR:12q24.32:chr12:128652000:128794999::	chr12:128,652,000-128,794,999 (143Mb, 12q24.32)	CNVR	12	128652000	128794999	N:GEXP:DHX37:chr12:125431370:125473667:-:	DHX37	GEXP	12	125431370	125473667	3178333	21.3	29.6	0.453	565
N:CNVR:12q24.32:chr12:128651000:128651999::	chr12:128,651,000-128,651,999 (100kb, 12q24.32)	CNVR	12	128651000	128651999	N:GEXP:DHX37:chr12:125431370:125473667:-:	DHX37	GEXP	12	125431370	125473667	3177333	21.3	29.6	0.454	565
N:CNVR:12q24.32:chr12:129229000:129229999::	chr12:129,229,000-129,229,999 (100kb, 12q24.32)	CNVR	12	129229000	129229999	N:GEXP:DHX37:chr12:125431370:125473667:-:	DHX37	GEXP	12	125431370	125473667	3755333	21.2	29.4	0.461	543
N:CNVR:12q24.33:chr12:130520000:130823999::	chr12:130,520,000-130,823,999 (304Mb, 12q24.33)	CNVR	12	130520000	130823999	N:GEXP:DHX37:chr12:125431370:125473667:-:	DHX37	GEXP	12	125431370	125473667	5046333	21	29.3	0.452	565
N:GEXP:COPS4:chr4:83956239:83996971:+:	COPS4	GEXP	4	83956239	83996971	N:GEXP:DHX37:chr12:125431370:125473667:-:	DHX37	GEXP	12	125431370	125473667	500000000	21.2	29.2	-0.448	574
N:CNVR:12q24.33:chr12:131154000:131616999::	chr12:131,154,000-131,616,999 (463Mb, 12q24.33)	CNVR	12	131154000	131616999	N:GEXP:DHX37:chr12:125431370:125473667:-:	DHX37	GEXP	12	125431370	125473667	5680333	20.8	29.1	0.45	565
N:CNVR:12q24.33:chr12:130447000:130450999::	chr12:130,447,000-130,450,999 (4Mb, 12q24.33)	CNVR	12	130447000	130450999	N:GEXP:DHX37:chr12:125431370:125473667:-:	DHX37	GEXP	12	125431370	125473667	4973333	20.8	29	0.45	565
N:CNVR:12q24.32:chr12:126995000:127004999::	chr12:126,995,000-127,004,999 (10Mb, 12q24.32)	CNVR	12	126995000	127004999	N:GEXP:DHX37:chr12:125431370:125473667:-:	DHX37	GEXP	12	125431370	125473667	1521333	20.7	28.9	0.449	565
N:CNVR:12q24.31:chr12:125642000:125652999::	chr12:125,642,000-125,652,999 (11Mb, 12q24.31)	CNVR	12	125642000	125652999	N:GEXP:DHX37:chr12:125431370:125473667:-:	DHX37	GEXP	12	125431370	125473667	168333	20.5	28.8	0.448	565
N:CNVR:TMEM132C:chr12:129164000:129164999::	chr12:129,164,000-129,164,999 (100kb, TMEM132C)	CNVR	12	129164000	129164999	N:GEXP:DHX37:chr12:125431370:125473667:-:	DHX37	GEXP	12	125431370	125473667	3690333	20.5	28.8	0.448	565
N:GEXP:AKAP8L:chr19:15490859:15529833:-:	AKAP8L	GEXP	19	15490859	15529833	N:GEXP:DHX37:chr12:125431370:125473667:-:	DHX37	GEXP	12	125431370	125473667	500000000	20.7	28.6	0.443	574
N:CNVR:12q24.32:chr12:126994000:126994999::	chr12:126,994,000-126,994,999 (100kb, 12q24.32)	CNVR	12	126994000	126994999	N:GEXP:DHX37:chr12:125431370:125473667:-:	DHX37	GEXP	12	125431370	125473667	1520333	20.2	28.5	0.446	565
N:CNVR:12q24.31:chr12:124160000:124817999::	chr12:124,160,000-124,817,999 (658Mb, 12q24.31)	CNVR	12	124160000	124817999	N:GEXP:DHX37:chr12:125431370:125473667:-:	DHX37	GEXP	12	125431370	125473667	613371	20.2	28.5	0.446	565
N:CNVR:RIMBP2:chr12:130972000:131146999::	chr12:130,972,000-131,146,999 (175Mb, RIMBP2)	CNVR	12	130972000	131146999	N:GEXP:DHX37:chr12:125431370:125473667:-:	DHX37	GEXP	12	125431370	125473667	5498333	20.1	28.4	0.445	565
N:GEXP:DHX37:chr12:125431370:125473667:-:	DHX37	GEXP	12	125431370	125473667	N:GEXP:PELP1:chr17:4574679:4607632:-:	PELP1	GEXP	17	4574679	4607632	500000000	20.4	28.3	0.441	574
N:GEXP:DHX37:chr12:125431370:125473667:-:	DHX37	GEXP	12	125431370	125473667	N:GEXP:UBE2W:chr8:74692332:74791110:-:	UBE2W	GEXP	8	74692332	74791110	500000000	20.4	28.3	-0.441	574
N:CNVR:12q24.33:chr12:132172000:132611999::	chr12:132,172,000-132,611,999 (440Mb, 12q24.33)	CNVR	12	132172000	132611999	N:GEXP:DHX37:chr12:125431370:125473667:-:	DHX37	GEXP	12	125431370	125473667	6698333	19.9	28.2	0.443	565
N:GEXP:BRAT1:chr7:2577444:2595392:-:	BRAT1	GEXP	7	2577444	2595392	N:GEXP:DHX37:chr12:125431370:125473667:-:	DHX37	GEXP	12	125431370	125473667	500000000	20.2	28.2	0.44	574
N:CNVR:12q24.33:chr12:131731000:131731999::	chr12:131,731,000-131,731,999 (100kb, 12q24.33)	CNVR	12	131731000	131731999	N:GEXP:DHX37:chr12:125431370:125473667:-:	DHX37	GEXP	12	125431370	125473667	6257333	19.9	28.1	0.443	565
N:GEXP:DHX37:chr12:125431370:125473667:-:	DHX37	GEXP	12	125431370	125473667	N:GEXP:TM4SF18:chr3:149036285:149051548:-:	TM4SF18	GEXP	3	149036285	149051548	500000000	20.1	28	-0.439	574
N:CNVR:12q24.33:chr12:131899000:132092999::	chr12:131,899,000-132,092,999 (194Mb, 12q24.33)	CNVR	12	131899000	132092999	N:GEXP:DHX37:chr12:125431370:125473667:-:	DHX37	GEXP	12	125431370	125473667	6425333	19.8	28	0.442	565
N:GEXP:DHX37:chr12:125431370:125473667:-:	DHX37	GEXP	12	125431370	125473667	N:GEXP:MTMR6:chr13:25802307:25861704:-:	MTMR6	GEXP	13	25802307	25861704	500000000	20.1	28	-0.439	574
N:GEXP:DHX37:chr12:125431370:125473667:-:	DHX37	GEXP	12	125431370	125473667	N:GEXP:MEPCE:chr7:100026413:100031749:+:	MEPCE	GEXP	7	100026413	100031749	500000000	20	28	0.439	574
N:CNVR:GLT1D1:chr12:129459000:129461999::	chr12:129,459,000-129,461,999 (3Mb, GLT1D1)	CNVR	12	129459000	129461999	N:GEXP:DHX37:chr12:125431370:125473667:-:	DHX37	GEXP	12	125431370	125473667	3985333	19.6	27.9	0.441	565
N:CNVR:12q24.33:chr12:131732000:131733999::	chr12:131,732,000-131,733,999 (2Mb, 12q24.33)	CNVR	12	131732000	131733999	N:GEXP:DHX37:chr12:125431370:125473667:-:	DHX37	GEXP	12	125431370	125473667	6258333	19.5	27.7	0.44	565
N:CNVR:LOC338797:chr12:131826000:131896999::	chr12:131,826,000-131,896,999 (71Mb, LOC338797)	CNVR	12	131826000	131896999	N:GEXP:DHX37:chr12:125431370:125473667:-:	DHX37	GEXP	12	125431370	125473667	6352333	19.4	27.6	0.439	565
N:GEXP:DHX37:chr12:125431370:125473667:-:	DHX37	GEXP	12	125431370	125473667	N:GEXP:SMG5:chr1:156219015:156252620:-:	SMG5	GEXP	1	156219015	156252620	500000000	19.5	27.5	0.435	574
N:GEXP:DHX37:chr12:125431370:125473667:-:	DHX37	GEXP	12	125431370	125473667	N:GEXP:TCEAL8:chrX:102507923:102510121:-:	TCEAL8	GEXP	X	102507923	102510121	500000000	19.6	27.5	-0.435	574
N:GEXP:DHX37:chr12:125431370:125473667:-:	DHX37	GEXP	12	125431370	125473667	N:GEXP:ULK1:chr12:132379279:132407707:+:	ULK1	GEXP	12	132379279	132407707	6905612	19.5	27.4	0.434	574
N:CNVR:12q24.33:chr12:133008000:133161999::	chr12:133,008,000-133,161,999 (154Mb, 12q24.33)	CNVR	12	133008000	133161999	N:GEXP:DHX37:chr12:125431370:125473667:-:	DHX37	GEXP	12	125431370	125473667	7534333	19	27.3	0.437	565
N:CNVR:12q24.33:chr12:130862000:130863999::	chr12:130,862,000-130,863,999 (2Mb, 12q24.33)	CNVR	12	130862000	130863999	N:GEXP:DHX37:chr12:125431370:125473667:-:	DHX37	GEXP	12	125431370	125473667	5388333	19	27.3	0.436	565
N:CNVR:RIMBP2:chr12:130892000:130966999::	chr12:130,892,000-130,966,999 (75Mb, RIMBP2)	CNVR	12	130892000	130966999	N:GEXP:DHX37:chr12:125431370:125473667:-:	DHX37	GEXP	12	125431370	125473667	5418333	19.1	27.3	0.437	565
N:CNVR:LOC100190940:chr12:130512000:130519999::	chr12:130,512,000-130,519,999 (8Mb, LOC100190940)	CNVR	12	130512000	130519999	N:GEXP:DHX37:chr12:125431370:125473667:-:	DHX37	GEXP	12	125431370	125473667	5038333	18.9	27.1	0.435	565
N:GEXP:CAPZA2:chr7:116451124:116559313:+:	CAPZA2	GEXP	7	116451124	116559313	N:GEXP:DHX37:chr12:125431370:125473667:-:	DHX37	GEXP	12	125431370	125473667	500000000	19.1	27.1	-0.432	574
N:CNVR:TMEM132D:chr12:130146000:130146999::	chr12:130,146,000-130,146,999 (100kb, TMEM132D)	CNVR	12	130146000	130146999	N:GEXP:DHX37:chr12:125431370:125473667:-:	DHX37	GEXP	12	125431370	125473667	4672333	18.9	27.1	0.436	565
N:CNVR:12q24.33:chr12:132093000:132096999::	chr12:132,093,000-132,096,999 (4Mb, 12q24.33)	CNVR	12	132093000	132096999	N:GEXP:DHX37:chr12:125431370:125473667:-:	DHX37	GEXP	12	125431370	125473667	6619333	18.8	27.1	0.435	565
N:GEXP:DHX37:chr12:125431370:125473667:-:	DHX37	GEXP	12	125431370	125473667	N:GEXP:VBP1:chrX:154444701:154468098:+:	VBP1	GEXP	X	154444701	154468098	500000000	19.2	27.1	-0.432	574
N:GEXP:DHX37:chr12:125431370:125473667:-:	DHX37	GEXP	12	125431370	125473667	N:GEXP:RRP12:chr10:99116458:99161127:-:	RRP12	GEXP	10	99116458	99161127	500000000	19.2	27.1	0.432	574
N:CNVR:LOC100507055:chr12:133162000:133181999::	chr12:133,162,000-133,181,999 (20Mb, LOC100507055)	CNVR	12	133162000	133181999	N:GEXP:DHX37:chr12:125431370:125473667:-:	DHX37	GEXP	12	125431370	125473667	7688333	18.8	27	0.438	555
N:CNVR:RIMBP2:chr12:131148000:131153999::	chr12:131,148,000-131,153,999 (6Mb, RIMBP2)	CNVR	12	131148000	131153999	N:GEXP:DHX37:chr12:125431370:125473667:-:	DHX37	GEXP	12	125431370	125473667	5674333	18.6	26.9	0.434	565
N:GEXP:ARFIP1:chr4:153701112:153833063:+:	ARFIP1	GEXP	4	153701112	153833063	N:GEXP:DHX37:chr12:125431370:125473667:-:	DHX37	GEXP	12	125431370	125473667	500000000	18.9	26.9	-0.431	574
N:CNVR:12q24.33:chr12:131728000:131730999::	chr12:131,728,000-131,730,999 (3Mb, 12q24.33)	CNVR	12	131728000	131730999	N:GEXP:DHX37:chr12:125431370:125473667:-:	DHX37	GEXP	12	125431370	125473667	6254333	18.7	26.9	0.444	538
N:GEXP:DHX37:chr12:125431370:125473667:-:	DHX37	GEXP	12	125431370	125473667	N:GEXP:ZCCHC8:chr12:122956146:122985543:-:	ZCCHC8	GEXP	12	122956146	122985543	2445827	18.9	26.9	0.431	574
N:CNVR:12q24.33:chr12:131734000:131734999::	chr12:131,734,000-131,734,999 (100kb, 12q24.33)	CNVR	12	131734000	131734999	N:GEXP:DHX37:chr12:125431370:125473667:-:	DHX37	GEXP	12	125431370	125473667	6260333	18.5	26.8	0.433	565
N:CNVR:12q24.33:chr12:132143000:132171999::	chr12:132,143,000-132,171,999 (29Mb, 12q24.33)	CNVR	12	132143000	132171999	N:GEXP:DHX37:chr12:125431370:125473667:-:	DHX37	GEXP	12	125431370	125473667	6669333	18.4	26.7	0.432	565
N:GEXP:DHX37:chr12:125431370:125473667:-:	DHX37	GEXP	12	125431370	125473667	N:GEXP:RAB18:chr10:27793249:27829099:+:	RAB18	GEXP	10	27793249	27829099	500000000	18.6	26.6	-0.428	574
N:CNVR:RIMBP2:chr12:131147000:131147999::	chr12:131,147,000-131,147,999 (100kb, RIMBP2)	CNVR	12	131147000	131147999	N:GEXP:DHX37:chr12:125431370:125473667:-:	DHX37	GEXP	12	125431370	125473667	5673333	18.2	26.5	0.431	565
N:CNVR:TMEM132D:chr12:130145000:130145999::	chr12:130,145,000-130,145,999 (100kb, TMEM132D)	CNVR	12	130145000	130145999	N:GEXP:DHX37:chr12:125431370:125473667:-:	DHX37	GEXP	12	125431370	125473667	4671333	18.2	26.4	0.43	565
N:GEXP:DHX37:chr12:125431370:125473667:-:	DHX37	GEXP	12	125431370	125473667	N:GEXP:DYNLT3:chrX:37698089:37706889:-:	DYNLT3	GEXP	X	37698089	37706889	500000000	18.4	26.4	-0.427	574
N:GEXP:ATP6AP2:chrX:40440216:40465888:+:	ATP6AP2	GEXP	X	40440216	40465888	N:GEXP:DHX37:chr12:125431370:125473667:-:	DHX37	GEXP	12	125431370	125473667	500000000	18.5	26.4	-0.427	574
N:GEXP:DHX37:chr12:125431370:125473667:-:	DHX37	GEXP	12	125431370	125473667	N:GEXP:FAM49B:chr8:130853716:131028897:-:	FAM49B	GEXP	8	130853716	131028897	500000000	18.4	26.3	-0.426	574
N:GEXP:C15ORF29:chr15:34432875:34502297:-:	C15ORF29	GEXP	15	34432875	34502297	N:GEXP:DHX37:chr12:125431370:125473667:-:	DHX37	GEXP	12	125431370	125473667	500000000	18.3	26.2	-0.426	574
N:GEXP:DHX37:chr12:125431370:125473667:-:	DHX37	GEXP	12	125431370	125473667	N:GEXP:TXNDC9:chr2:99923088:99957165:-:	TXNDC9	GEXP	2	99923088	99957165	500000000	18.1	26	-0.424	574
N:GEXP:ATG2A:chr11:64662004:64684722:-:	ATG2A	GEXP	11	64662004	64684722	N:GEXP:DHX37:chr12:125431370:125473667:-:	DHX37	GEXP	12	125431370	125473667	500000000	17.9	25.9	0.423	574
N:CNVR:12q24.33:chr12:131803000:131813999::	chr12:131,803,000-131,813,999 (11Mb, 12q24.33)	CNVR	12	131803000	131813999	N:GEXP:DHX37:chr12:125431370:125473667:-:	DHX37	GEXP	12	125431370	125473667	6329333	17.6	25.9	0.426	565
N:GEXP:DHX37:chr12:125431370:125473667:-:	DHX37	GEXP	12	125431370	125473667	N:GEXP:MAGEH1:chrX:55478538:55479999:+:	MAGEH1	GEXP	X	55478538	55479999	500000000	17.8	25.8	-0.422	574
N:GEXP:DHX37:chr12:125431370:125473667:-:	DHX37	GEXP	12	125431370	125473667	N:GEXP:TCOF1:chr5:149737202:149779871:+:	TCOF1	GEXP	5	149737202	149779871	500000000	17.8	25.7	0.422	574
N:CNVR:NCOR2:chr12:124834000:124838999::	chr12:124,834,000-124,838,999 (5Mb, NCOR2)	CNVR	12	124834000	124838999	N:GEXP:DHX37:chr12:125431370:125473667:-:	DHX37	GEXP	12	125431370	125473667	592371	17.4	25.7	0.425	565
N:GEXP:DHX37:chr12:125431370:125473667:-:	DHX37	GEXP	12	125431370	125473667	N:GEXP:IDI1:chr10:1085964:1102644:-:	IDI1	GEXP	10	1085964	1102644	500000000	17.8	25.7	-0.422	574
N:GEXP:DHX37:chr12:125431370:125473667:-:	DHX37	GEXP	12	125431370	125473667	N:GEXP:PHOSPHO2:chr2:170550964:170558218:+:	PHOSPHO2	GEXP	2	170550964	170558218	500000000	17.7	25.6	-0.421	574
N:CNVR:TMEM132C:chr12:128795000:128803999::	chr12:128,795,000-128,803,999 (9Mb, TMEM132C)	CNVR	12	128795000	128803999	N:GEXP:DHX37:chr12:125431370:125473667:-:	DHX37	GEXP	12	125431370	125473667	3321333	17.2	25.5	0.423	565
N:GEXP:DHX37:chr12:125431370:125473667:-:	DHX37	GEXP	12	125431370	125473667	N:GEXP:MAPK9:chr5:179660595:179719071:-:	MAPK9	GEXP	5	179660595	179719071	500000000	17.5	25.5	-0.42	574
N:GEXP:DHX37:chr12:125431370:125473667:-:	DHX37	GEXP	12	125431370	125473667	N:GEXP:RNFT2:chr12:117176096:117291436:+:	RNFT2	GEXP	12	117176096	117291436	8139934	17.6	25.5	0.42	574
N:GEXP:DHX37:chr12:125431370:125473667:-:	DHX37	GEXP	12	125431370	125473667	N:GEXP:SUPT5H:chr19:39936186:39967308:+:	SUPT5H	GEXP	19	39936186	39967308	500000000	17.6	25.5	0.42	574
N:CNVR:12q24.31:chr12:122133000:124122999::	chr12:122,133,000-124,122,999 (2bp, 12q24.31)	CNVR	12	122133000	124122999	N:GEXP:DHX37:chr12:125431370:125473667:-:	DHX37	GEXP	12	125431370	125473667	1308371	17.1	25.4	0.422	565
N:GEXP:DHX37:chr12:125431370:125473667:-:	DHX37	GEXP	12	125431370	125473667	N:GEXP:TM2D3:chr15:102173180:102192594:-:	TM2D3	GEXP	15	102173180	102192594	500000000	17.5	25.4	-0.419	574
N:GEXP:C1GALT1C1:chrX:119759529:119764005:-:	C1GALT1C1	GEXP	X	119759529	119764005	N:GEXP:DHX37:chr12:125431370:125473667:-:	DHX37	GEXP	12	125431370	125473667	500000000	17.4	25.3	-0.419	574
N:CNVR:12q24.33:chr12:131797000:131802999::	chr12:131,797,000-131,802,999 (6Mb, 12q24.33)	CNVR	12	131797000	131802999	N:GEXP:DHX37:chr12:125431370:125473667:-:	DHX37	GEXP	12	125431370	125473667	6323333	16.9	25.2	0.43	538
N:GEXP:DHX37:chr12:125431370:125473667:-:	DHX37	GEXP	12	125431370	125473667	N:GEXP:LYPLA1:chr8:54958938:55014577:-:	LYPLA1	GEXP	8	54958938	55014577	500000000	17.2	25.2	-0.417	574
N:GEXP:DHX37:chr12:125431370:125473667:-:	DHX37	GEXP	12	125431370	125473667	N:GEXP:NDUFB5:chr3:179322575:179342288:+:	NDUFB5	GEXP	3	179322575	179342288	500000000	17.2	25.2	-0.418	574
N:GEXP:DHX37:chr12:125431370:125473667:-:	DHX37	GEXP	12	125431370	125473667	N:GEXP:TELO2:chr16:1543352:1560460:+:	TELO2	GEXP	16	1543352	1560460	500000000	17.2	25.2	0.417	574
N:GEXP:DHX37:chr12:125431370:125473667:-:	DHX37	GEXP	12	125431370	125473667	N:GEXP:PGM2:chr4:37828282:37864559:+:	PGM2	GEXP	4	37828282	37864559	500000000	17.1	25.1	-0.417	574
N:GEXP:DHX37:chr12:125431370:125473667:-:	DHX37	GEXP	12	125431370	125473667	N:GEXP:TCEAL1:chrX:102883648:102885876:+:	TCEAL1	GEXP	X	102883648	102885876	500000000	17.1	25	-0.416	574
N:GEXP:DHX37:chr12:125431370:125473667:-:	DHX37	GEXP	12	125431370	125473667	N:GEXP:ZNF512B:chr20:62588055:62601218:-:	ZNF512B	GEXP	20	62588055	62601218	500000000	17	24.9	0.415	574
N:GEXP:DHX37:chr12:125431370:125473667:-:	DHX37	GEXP	12	125431370	125473667	N:GEXP:SELT:chr3:150321066:150348234:+:	SELT	GEXP	3	150321066	150348234	500000000	16.9	24.9	-0.415	574
N:GEXP:DHX37:chr12:125431370:125473667:-:	DHX37	GEXP	12	125431370	125473667	N:GEXP:RNF31:chr14:24616096:24635774:+:	RNF31	GEXP	14	24616096	24635774	500000000	16.8	24.8	0.414	574
N:GEXP:DHX37:chr12:125431370:125473667:-:	DHX37	GEXP	12	125431370	125473667	N:GEXP:MOSPD2:chrX:14891527:14939459:+:	MOSPD2	GEXP	X	14891527	14939459	500000000	16.8	24.7	-0.414	574
N:GEXP:DHX37:chr12:125431370:125473667:-:	DHX37	GEXP	12	125431370	125473667	N:GEXP:DNAJB9:chr7:108210189:108215294:+:	DNAJB9	GEXP	7	108210189	108215294	500000000	16.7	24.7	-0.413	574
N:GEXP:C11ORF46:chr11:30344649:30359165:+:	C11ORF46	GEXP	11	30344649	30359165	N:GEXP:DHX37:chr12:125431370:125473667:-:	DHX37	GEXP	12	125431370	125473667	500000000	16.7	24.7	-0.413	574
N:CNVR:12q24.33:chr12:132142000:132142999::	chr12:132,142,000-132,142,999 (100kb, 12q24.33)	CNVR	12	132142000	132142999	N:GEXP:DHX37:chr12:125431370:125473667:-:	DHX37	GEXP	12	125431370	125473667	6668333	16.4	24.6	0.416	565
N:GEXP:DHX37:chr12:125431370:125473667:-:	DHX37	GEXP	12	125431370	125473667	N:GEXP:MMGT1:chrX:135044231:135056188:-:	MMGT1	GEXP	X	135044231	135056188	500000000	16.5	24.4	-0.411	574
N:GEXP:DHX37:chr12:125431370:125473667:-:	DHX37	GEXP	12	125431370	125473667	N:GEXP:MBD6:chr12:57916659:57923931:+:	MBD6	GEXP	12	57916659	57923931	67507439	16.4	24.3	0.411	574
N:GEXP:DHX37:chr12:125431370:125473667:-:	DHX37	GEXP	12	125431370	125473667	N:GEXP:NOP2:chr12:6666037:6677480:-:	NOP2	GEXP	12	6666037	6677480	118753890	16.2	24.1	0.409	574
N:GEXP:DHX37:chr12:125431370:125473667:-:	DHX37	GEXP	12	125431370	125473667	N:GEXP:ZBED3:chr5:76372532:76383030:-:	ZBED3	GEXP	5	76372532	76383030	500000000	16.1	24.1	0.408	574
N:GEXP:DHX37:chr12:125431370:125473667:-:	DHX37	GEXP	12	125431370	125473667	N:GEXP:RFK:chr9:79000433:79009444:-:	RFK	GEXP	9	79000433	79009444	500000000	16.1	24.1	-0.409	574
N:CNVR:12q24.33:chr12:133504000:133778000::	chr12:133,504,000-133,778,000 (274Mb, 12q24.33)	CNVR	12	133504000	133778000	N:GEXP:DHX37:chr12:125431370:125473667:-:	DHX37	GEXP	12	125431370	125473667	8030333	15.8	24.1	0.412	565
N:CNVR:12q24.33:chr12:131735000:131774999::	chr12:131,735,000-131,774,999 (40Mb, 12q24.33)	CNVR	12	131735000	131774999	N:GEXP:DHX37:chr12:125431370:125473667:-:	DHX37	GEXP	12	125431370	125473667	6261333	15.7	24	0.411	565
N:GEXP:DDX11:chr12:31226779:31257725:+:	DDX11	GEXP	12	31226779	31257725	N:GEXP:DHX37:chr12:125431370:125473667:-:	DHX37	GEXP	12	125431370	125473667	94173645	16	24	0.408	574
N:CNVR:NCOR2:chr12:124818000:124832999::	chr12:124,818,000-124,832,999 (15Mb, NCOR2)	CNVR	12	124818000	124832999	N:GEXP:DHX37:chr12:125431370:125473667:-:	DHX37	GEXP	12	125431370	125473667	598371	15.8	24	0.411	565
N:CNVR:12q24.33:chr12:133182000:133224999::	chr12:133,182,000-133,224,999 (43Mb, 12q24.33)	CNVR	12	133182000	133224999	N:GEXP:DHX37:chr12:125431370:125473667:-:	DHX37	GEXP	12	125431370	125473667	7708333	15.8	24	0.411	565
N:CNVR:BC042649:chr12:131776000:131793999::	chr12:131,776,000-131,793,999 (18Mb, BC042649)	CNVR	12	131776000	131793999	N:GEXP:DHX37:chr12:125431370:125473667:-:	DHX37	GEXP	12	125431370	125473667	6302333	15.8	24	0.411	565
N:GEXP:DHX37:chr12:125431370:125473667:-:	DHX37	GEXP	12	125431370	125473667	N:GEXP:NCOR2:chr12:124808957:125052010:-:	NCOR2	GEXP	12	124808957	125052010	379360	15.9	23.9	0.407	574
N:CNVR:12q24.31:chr12:121177000:122097999::	chr12:121,177,000-122,097,999 (921Mb, 12q24.31)	CNVR	12	121177000	122097999	N:GEXP:DHX37:chr12:125431370:125473667:-:	DHX37	GEXP	12	125431370	125473667	3333371	15.7	23.9	0.41	565
N:GEXP:DHX37:chr12:125431370:125473667:-:	DHX37	GEXP	12	125431370	125473667	N:GEXP:GOLGA3:chr12:133345495:133405426:-:	GOLGA3	GEXP	12	133345495	133405426	7871828	15.9	23.8	0.406	574
N:GEXP:DHX37:chr12:125431370:125473667:-:	DHX37	GEXP	12	125431370	125473667	N:GEXP:HIP1R:chr12:123319295:123347507:+:	HIP1R	GEXP	12	123319295	123347507	2083863	15.9	23.8	0.407	574
N:GEXP:DHX37:chr12:125431370:125473667:-:	DHX37	GEXP	12	125431370	125473667	N:GEXP:ZMIZ2:chr7:44788180:44810735:+:	ZMIZ2	GEXP	7	44788180	44810735	500000000	15.8	23.8	0.406	574
N:CNVR:12q24.33:chr12:132099000:132119999::	chr12:132,099,000-132,119,999 (21Mb, 12q24.33)	CNVR	12	132099000	132119999	N:GEXP:DHX37:chr12:125431370:125473667:-:	DHX37	GEXP	12	125431370	125473667	6625333	15.5	23.8	0.409	565
N:GEXP:DHX37:chr12:125431370:125473667:-:	DHX37	GEXP	12	125431370	125473667	N:GEXP:KBTBD3:chr11:105921825:105948465:-:	KBTBD3	GEXP	11	105921825	105948465	500000000	15.7	23.7	-0.405	574
N:GEXP:DHX37:chr12:125431370:125473667:-:	DHX37	GEXP	12	125431370	125473667	N:GEXP:RSPRY1:chr16:57220241:57272947:+:	RSPRY1	GEXP	16	57220241	57272947	500000000	15.8	23.7	-0.406	574
N:GEXP:C9ORF85:chr9:74526423:74599390:+:	C9ORF85	GEXP	9	74526423	74599390	N:GEXP:DHX37:chr12:125431370:125473667:-:	DHX37	GEXP	12	125431370	125473667	500000000	15.8	23.7	-0.406	574
N:CNVR:12q24.33:chr12:133061791:133851895::Gistic_ROI_r_del	12q24.33 Deletion (Gistic, continuous)	CNVR	12	133061791	133851895	N:GEXP:DHX37:chr12:125431370:125473667:-:	DHX37	GEXP	12	125431370	125473667	7588124	15.5	23.7	0.411	559
N:GEXP:DHX37:chr12:125431370:125473667:-:	DHX37	GEXP	12	125431370	125473667	N:GEXP:GPR34:chrX:41548226:41556530:+:	GPR34	GEXP	X	41548226	41556530	500000000	15.6	23.6	-0.404	574
N:CNVR:NCOR2:chr12:124833000:124833999::	chr12:124,833,000-124,833,999 (100kb, NCOR2)	CNVR	12	124833000	124833999	N:GEXP:DHX37:chr12:125431370:125473667:-:	DHX37	GEXP	12	125431370	125473667	597371	15.3	23.6	0.408	565
N:CNVR:RIMBP2:chr12:130967000:130971999::	chr12:130,967,000-130,971,999 (5Mb, RIMBP2)	CNVR	12	130967000	130971999	N:GEXP:DHX37:chr12:125431370:125473667:-:	DHX37	GEXP	12	125431370	125473667	5493333	15.3	23.6	0.408	565
N:GEXP:DHX37:chr12:125431370:125473667:-:	DHX37	GEXP	12	125431370	125473667	N:GEXP:PLEKHF2:chr8:96145949:96168913:+:	PLEKHF2	GEXP	8	96145949	96168913	500000000	15.6	23.6	-0.404	574
N:GEXP:DHX37:chr12:125431370:125473667:-:	DHX37	GEXP	12	125431370	125473667	N:GEXP:SARS2:chr19:39405904:39466380:-:	SARS2	GEXP	19	39405904	39466380	500000000	15.6	23.5	0.404	574
N:GEXP:CHTF18:chr16:838622:848074:+:	CHTF18	GEXP	16	838622	848074	N:GEXP:DHX37:chr12:125431370:125473667:-:	DHX37	GEXP	12	125431370	125473667	500000000	15.6	23.5	0.404	574
N:GEXP:DHX37:chr12:125431370:125473667:-:	DHX37	GEXP	12	125431370	125473667	N:GEXP:TMCO1:chr1:165693528:165796992:-:	TMCO1	GEXP	1	165693528	165796992	500000000	15.5	23.5	-0.404	574
N:GEXP:CAD:chr2:27440258:27466654:+:	CAD	GEXP	2	27440258	27466654	N:GEXP:DHX37:chr12:125431370:125473667:-:	DHX37	GEXP	12	125431370	125473667	500000000	15.5	23.5	0.404	574
N:GEXP:DHX37:chr12:125431370:125473667:-:	DHX37	GEXP	12	125431370	125473667	N:GEXP:NIPSNAP3A:chr9:107509968:107522403:+:	NIPSNAP3A	GEXP	9	107509968	107522403	500000000	15.5	23.5	-0.404	574
N:CNVR:12q24.33:chr12:133227000:133503999::	chr12:133,227,000-133,503,999 (277Mb, 12q24.33)	CNVR	12	133227000	133503999	N:GEXP:DHX37:chr12:125431370:125473667:-:	DHX37	GEXP	12	125431370	125473667	7753333	15.2	23.4	0.406	565
N:GEXP:CGRRF1:chr14:54976587:55005334:+:	CGRRF1	GEXP	14	54976587	55005334	N:GEXP:DHX37:chr12:125431370:125473667:-:	DHX37	GEXP	12	125431370	125473667	500000000	15.4	23.4	-0.403	574
N:GEXP:CCDC90B:chr11:82972502:82997414:-:	CCDC90B	GEXP	11	82972502	82997414	N:GEXP:DHX37:chr12:125431370:125473667:-:	DHX37	GEXP	12	125431370	125473667	500000000	15.3	23.3	-0.402	574
N:CNVR:12q24.23:chr12:119031000:119987999::	chr12:119,031,000-119,987,999 (957Mb, 12q24.23)	CNVR	12	119031000	119987999	N:GEXP:DHX37:chr12:125431370:125473667:-:	DHX37	GEXP	12	125431370	125473667	5443371	15	23.3	0.405	565
N:CNVR:12q24.33:chr12:131825000:131825999::	chr12:131,825,000-131,825,999 (100kb, 12q24.33)	CNVR	12	131825000	131825999	N:GEXP:DHX37:chr12:125431370:125473667:-:	DHX37	GEXP	12	125431370	125473667	6351333	14.9	23.2	0.404	565
N:GEXP:DHX37:chr12:125431370:125473667:-:	DHX37	GEXP	12	125431370	125473667	N:GEXP:NPAT:chr11:108028119:108093365:-:	NPAT	GEXP	11	108028119	108093365	500000000	15.1	23.1	-0.4	574
N:CNVR:12q24.33:chr12:131814000:131824999::	chr12:131,814,000-131,824,999 (11Mb, 12q24.33)	CNVR	12	131814000	131824999	N:GEXP:DHX37:chr12:125431370:125473667:-:	DHX37	GEXP	12	125431370	125473667	6340333	14.9	23.1	0.404	565
N:CNVR:POLE:chr12:133225000:133226999::	chr12:133,225,000-133,226,999 (2Mb, POLE)	CNVR	12	133225000	133226999	N:GEXP:DHX37:chr12:125431370:125473667:-:	DHX37	GEXP	12	125431370	125473667	7751333	14.8	23.1	0.404	565
N:GEXP:ATAD3A:chr1:1447523:1470067:+:	ATAD3A	GEXP	1	1447523	1470067	N:GEXP:DHX37:chr12:125431370:125473667:-:	DHX37	GEXP	12	125431370	125473667	500000000	15	23	0.4	574
N:CNVR:TBX3:chr12:115007000:116226999::	chr12:115,007,000-116,226,999 (1bp, TBX3)	CNVR	12	115007000	116226999	N:GEXP:DHX37:chr12:125431370:125473667:-:	DHX37	GEXP	12	125431370	125473667	9204371	14.6	22.9	0.402	565
N:GEXP:CCPG1:chr15:55647421:55790782:-:	CCPG1	GEXP	15	55647421	55790782	N:GEXP:DHX37:chr12:125431370:125473667:-:	DHX37	GEXP	12	125431370	125473667	500000000	14.9	22.9	-0.399	574
N:GEXP:DHX37:chr12:125431370:125473667:-:	DHX37	GEXP	12	125431370	125473667	N:GEXP:TMEM64:chr8:91634223:91803859:-:	TMEM64	GEXP	8	91634223	91803859	500000000	15	22.9	-0.399	574
N:GEXP:DHX37:chr12:125431370:125473667:-:	DHX37	GEXP	12	125431370	125473667	N:GEXP:SMPDL3A:chr6:123109971:123130864:+:	SMPDL3A	GEXP	6	123109971	123130864	500000000	14.9	22.9	-0.399	574
N:GEXP:DHX37:chr12:125431370:125473667:-:	DHX37	GEXP	12	125431370	125473667	N:GEXP:NIPSNAP3B:chr9:107509969:107553175:+:	NIPSNAP3B	GEXP	9	107509969	107553175	500000000	14.9	22.9	-0.399	574
N:GEXP:DHX37:chr12:125431370:125473667:-:	DHX37	GEXP	12	125431370	125473667	N:GEXP:FAM126B:chr2:201838441:201936392:-:	FAM126B	GEXP	2	201838441	201936392	500000000	14.9	22.9	-0.399	574
N:GEXP:DHX37:chr12:125431370:125473667:-:	DHX37	GEXP	12	125431370	125473667	N:GEXP:TRRAP:chr7:98476113:98634102:+:	TRRAP	GEXP	7	98476113	98634102	500000000	14.9	22.9	0.399	574
N:GEXP:AKTIP:chr16:53525192:53537170:-:	AKTIP	GEXP	16	53525192	53537170	N:GEXP:DHX37:chr12:125431370:125473667:-:	DHX37	GEXP	12	125431370	125473667	500000000	14.8	22.8	-0.398	574
N:CNVR:12q24.31:chr12:121124000:121176999::	chr12:121,124,000-121,176,999 (53Mb, 12q24.31)	CNVR	12	121124000	121176999	N:GEXP:DHX37:chr12:125431370:125473667:-:	DHX37	GEXP	12	125431370	125473667	4254371	14.4	22.7	0.4	565
N:GEXP:DHX37:chr12:125431370:125473667:-:	DHX37	GEXP	12	125431370	125473667	N:GEXP:PLDN:chr15:45879417:45901909:+:	PLDN	GEXP	15	45879417	45901909	500000000	14.7	22.7	-0.397	574
N:GEXP:DHX37:chr12:125431370:125473667:-:	DHX37	GEXP	12	125431370	125473667	N:GEXP:PSMD10:chrX:107327435:107334874:-:	PSMD10	GEXP	X	107327435	107334874	500000000	14.8	22.7	-0.398	574
N:CNVR:12q24.33:chr12:132097000:132098999::	chr12:132,097,000-132,098,999 (2Mb, 12q24.33)	CNVR	12	132097000	132098999	N:GEXP:DHX37:chr12:125431370:125473667:-:	DHX37	GEXP	12	125431370	125473667	6623333	14.4	22.7	0.4	565
N:GEXP:ARMCX3:chrX:100878120:100882831:+:	ARMCX3	GEXP	X	100878120	100882831	N:GEXP:DHX37:chr12:125431370:125473667:-:	DHX37	GEXP	12	125431370	125473667	500000000	14.8	22.7	-0.397	574
N:CNVR:12q24:chr12:119995000:121123999::	chr12:119,995,000-121,123,999 (1bp, 12q24)	CNVR	12	119995000	121123999	N:GEXP:DHX37:chr12:125431370:125473667:-:	DHX37	GEXP	12	125431370	125473667	4307371	14.4	22.7	0.4	565
N:GEXP:DHX37:chr12:125431370:125473667:-:	DHX37	GEXP	12	125431370	125473667	N:GEXP:TJAP1:chr6:43445261:43474294:+:	TJAP1	GEXP	6	43445261	43474294	500000000	14.7	22.6	0.397	574
N:CNVR:12q24.33:chr12:132612000:133007999::	chr12:132,612,000-133,007,999 (396Mb, 12q24.33)	CNVR	12	132612000	133007999	N:GEXP:DHX37:chr12:125431370:125473667:-:	DHX37	GEXP	12	125431370	125473667	7138333	14.3	22.6	0.399	565
N:GEXP:DHX37:chr12:125431370:125473667:-:	DHX37	GEXP	12	125431370	125473667	N:GEXP:RAP2C:chrX:131337053:131353475:-:	RAP2C	GEXP	X	131337053	131353475	500000000	14.6	22.5	-0.396	574
N:GEXP:DHX37:chr12:125431370:125473667:-:	DHX37	GEXP	12	125431370	125473667	N:GEXP:PDCD10:chr3:167401695:167452651:-:	PDCD10	GEXP	3	167401695	167452651	500000000	14.5	22.5	-0.395	574
N:CNVR:12q24.32:chr12:127634000:127634999::	chr12:127,634,000-127,634,999 (100kb, 12q24.32)	CNVR	12	127634000	127634999	N:GEXP:DHX37:chr12:125431370:125473667:-:	DHX37	GEXP	12	125431370	125473667	2160333	14.2	22.5	0.398	565
Table13.ACC
id_a	pretty_label_a	datatype_a	chr_a	start_a	end_a	id_b	pretty_label_b	datatype_b	chr_b	start_b	end_b	link_distance	adj_logged_pvalue	logged_pvalue	correlation	num_nonna
N:GEXP:DHX37:chr12:125431371:125473668:-:57647	DHX37	GEXP	12	125431371	125473668	N:GEXP:PGAM5:chr12:133287405:133299228:+:192111	PGAM5	GEXP	12	133287405	133299228	7813737	9.2	17.3	0.79	78
N:METH:DHX37:chr12:125473719:::cg24167975_TSS200_Island	DHX37 (TSS200, Island) cg24167975	METH	12	125473719		N:METH:SLC15A4:chr12:129308602:::cg05149425_TSS200_Island	SLC15A4 (TSS200, Island) cg05149425	METH	12	129308602		3834883	2	10.5	0.66	79
N:GEXP:ACTR6:chr12:100592900:100635643:+:64431	ACTR6	GEXP	12	100592900	100635643	N:GEXP:DHX37:chr12:125431371:125473668:-:57647	DHX37	GEXP	12	125431371	125473668	24795728	2.3	10.4	0.66	78
N:CNVR:12q24.32:chr12:127373000:127373999::	chr12:127,373,000-127,373,999 (100kb, 12q24.32)	CNVR	12	127373000	127373999	N:METH:DHX37:chr12:125473719:::cg24167975_TSS200_Island	DHX37 (TSS200, Island) cg24167975	METH	12	125473719		1899281	3	10.3	-0.66	77
N:CNVR:12q24.3:chr12:127374000:133161000::	chr12:127,374,000-133,161,000 (6bp, 12q24.3)	CNVR	12	127374000	133161000	N:METH:DHX37:chr12:125473719:::cg24167975_TSS200_Island	DHX37 (TSS200, Island) cg24167975	METH	12	125473719		1900281	2.8	10.1	-0.66	77
N:CNVR:12q24:chr12:119780000:127372999::	chr12:119,780,000-127,372,999 (8bp, 12q24)	CNVR	12	119780000	127372999	N:METH:DHX37:chr12:125473719:::cg24167975_TSS200_Island	DHX37 (TSS200, Island) cg24167975	METH	12	125473719		0	2.3	9.6	-0.65	77
N:GEXP:DHX37:chr12:125431371:125473668:-:57647	DHX37	GEXP	12	125431371	125473668	N:GEXP:PWP1:chr12:108079509:108106944:+:11137	PWP1	GEXP	12	108079509	108106944	17324427	1.5	9.6	0.64	78
N:GEXP:DHX37:chr12:125431371:125473668:-:57647	DHX37	GEXP	12	125431371	125473668	N:GEXP:TMED2:chr12:124069078:124083116:+:10959	TMED2	GEXP	12	124069078	124083116	1348255	1.2	9.3	0.63	78
N:GEXP:DHX37:chr12:125431371:125473668:-:57647	DHX37	GEXP	12	125431371	125473668	N:GEXP:SLC35A3:chr1:100435345:100492535:+:23443	SLC35A3	GEXP	1	100435345	100492535	500000000	1	9.2	0.63	78
N:GEXP:DHX37:chr12:125431371:125473668:-:57647	DHX37	GEXP	12	125431371	125473668	N:GEXP:LUZP6:chr7:135612022:135612198:-:767558	LUZP6	GEXP	7	135612022	135612198	500000000	0.8	8.9	0.62	78
N:GEXP:DHX37:chr12:125431371:125473668:-:57647	DHX37	GEXP	12	125431371	125473668	N:GEXP:RPAP3:chr12:48057070:48099844:-:79657	RPAP3	GEXP	12	48057070	48099844	77331527	0.6	8.8	0.62	78
N:GEXP:DHX37:chr12:125431371:125473668:-:57647	DHX37	GEXP	12	125431371	125473668	N:GEXP:GTF2H3:chr12:124118375:124147153:+:2967	GTF2H3	GEXP	12	124118375	124147153	1284218	0.5	8.6	0.61	78
N:GEXP:C12orf43:chr12:121440225:121454305:-:64897	C12orf43	GEXP	12	121440225	121454305	N:GEXP:DHX37:chr12:125431371:125473668:-:57647	DHX37	GEXP	12	125431371	125473668	3977066	0.3	8.5	0.61	78
N:GEXP:DHX37:chr12:125431371:125473668:-:57647	DHX37	GEXP	12	125431371	125473668	N:GEXP:GPN3:chr12:110890289:110907073:-:51184	GPN3	GEXP	12	110890289	110907073	14524298	0.3	8.5	0.61	78
N:GEXP:DHX37:chr12:125431371:125473668:-:57647	DHX37	GEXP	12	125431371	125473668	N:GEXP:POLR3B:chr12:106751436:106903976:+:55703	POLR3B	GEXP	12	106751436	106903976	18527395	0	8	0.59	78
N:GEXP:DHX37:chr12:125431371:125473668:-:57647	DHX37	GEXP	12	125431371	125473668	N:GEXP:TBCC:chr6:42712219:42714558:-:6903	TBCC	GEXP	6	42712219	42714558	500000000	0	7.8	-0.59	78
N:GEXP:DHX37:chr12:125431371:125473668:-:57647	DHX37	GEXP	12	125431371	125473668	N:GEXP:PRKDC:chr8:48685669:48872743:-:5591	PRKDC	GEXP	8	48685669	48872743	500000000	0	7.7	0.58	78
N:GEXP:DHX37:chr12:125431371:125473668:-:57647	DHX37	GEXP	12	125431371	125473668	N:GEXP:RBM4B:chr11:66432469:66445392:-:83759	RBM4B	GEXP	11	66432469	66445392	500000000	0	7.7	-0.59	78
N:GEXP:DHX37:chr12:125431371:125473668:-:57647	DHX37	GEXP	12	125431371	125473668	N:GEXP:SCAF11:chr12:46312914:46385903:-:9169	SCAF11	GEXP	12	46312914	46385903	79045468	0	7.6	0.58	78
N:GEXP:DHX37:chr12:125431371:125473668:-:57647	DHX37	GEXP	12	125431371	125473668	N:GEXP:RAB2A:chr8:61429416:61536186:+:5862	RAB2A	GEXP	8	61429416	61536186	500000000	0	7.5	0.58	78
N:GEXP:ATF7:chr12:53901640:54020199:-:11016	ATF7	GEXP	12	53901640	54020199	N:GEXP:DHX37:chr12:125431371:125473668:-:57647	DHX37	GEXP	12	125431371	125473668	71411172	0	7.5	0.58	78
N:GEXP:DHX37:chr12:125431371:125473668:-:57647	DHX37	GEXP	12	125431371	125473668	N:GEXP:VPS33A:chr12:122714111:122751068:-:65082	VPS33A	GEXP	12	122714111	122751068	2680303	0	7.4	0.57	78
N:GEXP:DHX37:chr12:125431371:125473668:-:57647	DHX37	GEXP	12	125431371	125473668	N:GEXP:TTC26:chr7:138818490:138876732:+:79989	TTC26	GEXP	7	138818490	138876732	500000000	0	7.4	0.58	78
N:GEXP:DHX37:chr12:125431371:125473668:-:57647	DHX37	GEXP	12	125431371	125473668	N:GEXP:MAPKAPK5:chr12:112279782:112334343:+:8550	MAPKAPK5	GEXP	12	112279782	112334343	13097028	0	7.4	0.57	78
N:CNVR:12q24.23:chr12:119275000:119275999::	chr12:119,275,000-119,275,999 (100kb, 12q24.23)	CNVR	12	119275000	119275999	N:METH:DHX37:chr12:125473719:::cg24167975_TSS200_Island	DHX37 (TSS200, Island) cg24167975	METH	12	125473719		6197720	0.1	7.4	-0.58	77
N:GEXP:DHX37:chr12:125431371:125473668:-:57647	DHX37	GEXP	12	125431371	125473668	N:GEXP:GATC:chr12:120884241:120899389:+:283459	GATC	GEXP	12	120884241	120899389	4531982	0	7.4	0.58	78
N:GEXP:DHX37:chr12:125431371:125473668:-:57647	DHX37	GEXP	12	125431371	125473668	N:GEXP:ERC1:chr12:1099675:1605099:+:23085	ERC1	GEXP	12	1099675	1605099	123826272	0	7.4	0.57	78
N:GEXP:DHX37:chr12:125431371:125473668:-:57647	DHX37	GEXP	12	125431371	125473668	N:GEXP:FKBP14:chr7:30050203:30066300:-:55033	FKBP14	GEXP	7	30050203	30066300	500000000	0	7.3	0.57	78
N:GEXP:DHX37:chr12:125431371:125473668:-:57647	DHX37	GEXP	12	125431371	125473668	N:GEXP:DIEXF:chr1:210001312:210030910:+:27042	DIEXF	GEXP	1	210001312	210030910	500000000	0	7.3	0.57	78
N:GEXP:DHX37:chr12:125431371:125473668:-:57647	DHX37	GEXP	12	125431371	125473668	N:GEXP:SRFBP1:chr5:121297656:121411265:+:153443	SRFBP1	GEXP	5	121297656	121411265	500000000	0	7.2	0.57	78
N:GEXP:DDX47:chr12:12966250:12982915:+:51202	DDX47	GEXP	12	12966250	12982915	N:GEXP:DHX37:chr12:125431371:125473668:-:57647	DHX37	GEXP	12	125431371	125473668	112448456	0	7.2	0.57	78
N:GEXP:DHX37:chr12:125431371:125473668:-:57647	DHX37	GEXP	12	125431371	125473668	N:GEXP:GCN1L1:chr12:120565007:120632513:-:10985	GCN1L1	GEXP	12	120565007	120632513	4798858	0	7.2	0.57	78
N:GEXP:DHX37:chr12:125431371:125473668:-:57647	DHX37	GEXP	12	125431371	125473668	N:GEXP:HEATR1:chr1:236712305:236767804:-:55127	HEATR1	GEXP	1	236712305	236767804	500000000	0	7.1	0.56	78
N:GEXP:DHX37:chr12:125431371:125473668:-:57647	DHX37	GEXP	12	125431371	125473668	N:GEXP:SNX12:chrX:70279094:70288273:-:29934	SNX12	GEXP	X	70279094	70288273	500000000	0	7.1	0.56	78
N:GEXP:DHX37:chr12:125431371:125473668:-:57647	DHX37	GEXP	12	125431371	125473668	N:GEXP:NUP155:chr5:37288239:37371283:-:9631	NUP155	GEXP	5	37288239	37371283	500000000	0	7	0.56	78
N:GEXP:DHX37:chr12:125431371:125473668:-:57647	DHX37	GEXP	12	125431371	125473668	N:GEXP:GPRC5C:chr17:72420990:72447792:+:55890	GPRC5C	GEXP	17	72420990	72447792	500000000	0	6.9	-0.56	78
N:GEXP:DHX37:chr12:125431371:125473668:-:57647	DHX37	GEXP	12	125431371	125473668	N:GEXP:ZNF710:chr15:90544624:90625438:+:374655	ZNF710	GEXP	15	90544624	90625438	500000000	0	6.9	0.56	78
N:GEXP:DHX37:chr12:125431371:125473668:-:57647	DHX37	GEXP	12	125431371	125473668	N:GEXP:RBL1:chr20:35624752:35724398:-:5933	RBL1	GEXP	20	35624752	35724398	500000000	0	6.8	0.55	78
N:GEXP:DHX37:chr12:125431371:125473668:-:57647	DHX37	GEXP	12	125431371	125473668	N:GEXP:MRPS35:chr12:27863706:27909228:+:60488	MRPS35	GEXP	12	27863706	27909228	97522143	0	6.8	0.55	78
N:GEXP:DHX37:chr12:125431371:125473668:-:57647	DHX37	GEXP	12	125431371	125473668	N:GEXP:TRIM56:chr7:100728720:100735017:+:81844	TRIM56	GEXP	7	100728720	100735017	500000000	0	6.8	0.55	78
N:GEXP:DHX37:chr12:125431371:125473668:-:57647	DHX37	GEXP	12	125431371	125473668	N:GEXP:SART3:chr12:108916357:108955176:-:9733	SART3	GEXP	12	108916357	108955176	16476195	0	6.8	0.55	78
N:CNVR:12q13.3:chr12:56658000:56661999::	chr12:56,658,000-56,661,999 (4Mb, 12q13.3)	CNVR	12	56658000	56661999	N:METH:DHX37:chr12:125473719:::cg24167975_TSS200_Island	DHX37 (TSS200, Island) cg24167975	METH	12	125473719		68811720	0	6.8	-0.57	74
N:CNVR:12q24.23:chr12:119276000:119777999::	chr12:119,276,000-119,777,999 (502Mb, 12q24.23)	CNVR	12	119276000	119777999	N:METH:DHX37:chr12:125473719:::cg24167975_TSS200_Island	DHX37 (TSS200, Island) cg24167975	METH	12	125473719		5695720	0	6.7	-0.55	77
N:GEXP:DHX37:chr12:125431371:125473668:-:57647	DHX37	GEXP	12	125431371	125473668	N:GEXP:MPHOSPH9:chr12:123636867:123728561:-:10198	MPHOSPH9	GEXP	12	123636867	123728561	1702810	0	6.7	0.55	78
N:GEXP:DHX37:chr12:125431371:125473668:-:57647	DHX37	GEXP	12	125431371	125473668	N:GEXP:PTPN11:chr12:112856155:112947717:+:5781	PTPN11	GEXP	12	112856155	112947717	12483654	0	6.6	0.54	78
N:GEXP:DHX37:chr12:125431371:125473668:-:57647	DHX37	GEXP	12	125431371	125473668	N:GEXP:PUS7L:chr12:44122410:44152620:-:83448	PUS7L	GEXP	12	44122410	44152620	81278751	0	6.5	0.54	78
N:GEXP:DHX37:chr12:125431371:125473668:-:57647	DHX37	GEXP	12	125431371	125473668	N:GEXP:OSBPL8:chr12:76745577:76953589:-:114882	OSBPL8	GEXP	12	76745577	76953589	48477782	0	6.5	0.54	78
N:GEXP:DHX37:chr12:125431371:125473668:-:57647	DHX37	GEXP	12	125431371	125473668	N:GEXP:DNAJA3:chr16:4475806:4506776:+:9093	DNAJA3	GEXP	16	4475806	4506776	500000000	0	6.4	0.54	78
N:GEXP:DHX37:chr12:125431371:125473668:-:57647	DHX37	GEXP	12	125431371	125473668	N:GEXP:LARS:chr5:145492601:145562223:-:51520	LARS	GEXP	5	145492601	145562223	500000000	0	6.4	0.54	78
N:GEXP:DHX37:chr12:125431371:125473668:-:57647	DHX37	GEXP	12	125431371	125473668	N:GEXP:YIPF6:chrX:67718165:67757127:+:286451	YIPF6	GEXP	X	67718165	67757127	500000000	0	6.4	0.54	78
N:GEXP:DHX37:chr12:125431371:125473668:-:57647	DHX37	GEXP	12	125431371	125473668	N:GEXP:NEIL1:chr15:75639296:75647592:+:79661	NEIL1	GEXP	15	75639296	75647592	500000000	0	6.3	-0.53	78
N:GEXP:DHX37:chr12:125431371:125473668:-:57647	DHX37	GEXP	12	125431371	125473668	N:GEXP:ZNHIT2:chr11:64883875:64885170:-:741	ZNHIT2	GEXP	11	64883875	64885170	500000000	0	6.3	-0.53	78
N:GEXP:DHX37:chr12:125431371:125473668:-:57647	DHX37	GEXP	12	125431371	125473668	N:METH:LONRF3:chrX:118107540:::cg00114913_TSS1500_Island	LONRF3 (TSS1500, Island) cg00114913	METH	X	118107540		500000000	0	6.3	-0.53	78
N:GEXP:DHX37:chr12:125431371:125473668:-:57647	DHX37	GEXP	12	125431371	125473668	N:GEXP:FAM73A:chr1:78245309:78344106:+:374986	FAM73A	GEXP	1	78245309	78344106	500000000	0	6.3	0.53	78
N:GEXP:DHX37:chr12:125431371:125473668:-:57647	DHX37	GEXP	12	125431371	125473668	N:GEXP:MOSPD2:chrX:14891563:14940449:+:158747	MOSPD2	GEXP	X	14891563	14940449	500000000	0	6.3	0.53	78
N:CNVR:12q12:chr12:39223000:40533999::	chr12:39,223,000-40,533,999 (1bp, 12q12)	CNVR	12	39223000	40533999	N:METH:DHX37:chr12:125473719:::cg24167975_TSS200_Island	DHX37 (TSS200, Island) cg24167975	METH	12	125473719		84939720	0	6.2	-0.53	77
N:CNVR:12q24.32:chr12:127373000:127373999::	chr12:127,373,000-127,373,999 (100kb, 12q24.32)	CNVR	12	127373000	127373999	N:GEXP:DHX37:chr12:125431371:125473668:-:57647	DHX37	GEXP	12	125431371	125473668	1899332	0	6.2	0.53	76
N:CNVR:12q12:chr12:40534000:40536999::	chr12:40,534,000-40,536,999 (3Mb, 12q12)	CNVR	12	40534000	40536999	N:METH:DHX37:chr12:125473719:::cg24167975_TSS200_Island	DHX37 (TSS200, Island) cg24167975	METH	12	125473719		84936720	0	6.2	-0.53	77
N:CNVR:12q23.1:chr12:81426000:119274999::	chr12:81,426,000-119,274,999 (38bp, 12q23.1)	CNVR	12	81426000	119274999	N:METH:DHX37:chr12:125473719:::cg24167975_TSS200_Island	DHX37 (TSS200, Island) cg24167975	METH	12	125473719		6198720	0	6.2	-0.53	77
N:GEXP:DHX37:chr12:125431371:125473668:-:57647	DHX37	GEXP	12	125431371	125473668	N:GEXP:PPP1R12A:chr12:80167343:80329240:-:4659	PPP1R12A	GEXP	12	80167343	80329240	45102131	0	6.2	0.53	78
N:GEXP:DHX37:chr12:125431371:125473668:-:57647	DHX37	GEXP	12	125431371	125473668	N:GEXP:NCOA3:chr20:46130601:46285621:+:8202	NCOA3	GEXP	20	46130601	46285621	500000000	0	6.2	0.53	78
N:GEXP:DHX37:chr12:125431371:125473668:-:57647	DHX37	GEXP	12	125431371	125473668	N:GEXP:NEDD1:chr12:97301001:97347129:+:121441	NEDD1	GEXP	12	97301001	97347129	28084242	0	6.2	0.53	78
N:GEXP:DHX37:chr12:125431371:125473668:-:57647	DHX37	GEXP	12	125431371	125473668	N:GEXP:SBNO1:chr12:123773656:123849390:-:55206	SBNO1	GEXP	12	123773656	123849390	1581981	0	6.1	0.53	78
N:GEXP:DHX37:chr12:125431371:125473668:-:57647	DHX37	GEXP	12	125431371	125473668	N:GEXP:LYSMD4:chr15:100255902:100273766:-:145748	LYSMD4	GEXP	15	100255902	100273766	500000000	0	6.1	-0.53	78
N:CNVR:12q24.23:chr12:119778000:119779999::	chr12:119,778,000-119,779,999 (2Mb, 12q24.23)	CNVR	12	119778000	119779999	N:METH:DHX37:chr12:125473719:::cg24167975_TSS200_Island	DHX37 (TSS200, Island) cg24167975	METH	12	125473719		5693720	0	6.1	-0.53	77
N:GEXP:DHX37:chr12:125431371:125473668:-:57647	DHX37	GEXP	12	125431371	125473668	N:GEXP:XRN2:chr20:21283942:21370463:+:22803	XRN2	GEXP	20	21283942	21370463	500000000	0	6	0.52	78
N:GEXP:DHX37:chr12:125431371:125473668:-:57647	DHX37	GEXP	12	125431371	125473668	N:GEXP:YWHAB:chr20:43514317:43537173:+:7529	YWHAB	GEXP	20	43514317	43537173	500000000	0	6	0.52	78
N:GEXP:COG5:chr7:106842000:107204959:-:10466	COG5	GEXP	7	106842000	107204959	N:GEXP:DHX37:chr12:125431371:125473668:-:57647	DHX37	GEXP	12	125431371	125473668	500000000	0	6	0.52	78
N:CNVR:12p12.1:chr12:25976000:25982999::	chr12:25,976,000-25,982,999 (7Mb, 12p12.1)	CNVR	12	25976000	25982999	N:METH:DHX37:chr12:125473719:::cg24167975_TSS200_Island	DHX37 (TSS200, Island) cg24167975	METH	12	125473719		99490720	0	6	-0.52	77
N:CNVR:12q24.3:chr12:127374000:133161000::	chr12:127,374,000-133,161,000 (6bp, 12q24.3)	CNVR	12	127374000	133161000	N:GEXP:DHX37:chr12:125431371:125473668:-:57647	DHX37	GEXP	12	125431371	125473668	1900332	0	6	0.53	76
Table14.LGG
id_a	pretty_label_a	datatype_a	chr_a	start_a	end_a	id_b	pretty_label_b	datatype_b	chr_b	start_b	end_b	link_distance	adj_logged_pvalue	logged_pvalue	correlation	num_nonna
N:GEXP:DHX37:chr12:125431370:125473667:-:57647	DHX37	GEXP	12	125431370	125473667	N:GEXP:IPO4:chr14:24649425:24659859:-:79711	IPO4	GEXP	14	24649425	24659859	500000000	27	35.1	0.664	271
N:GEXP:DHX37:chr12:125431370:125473667:-:57647	DHX37	GEXP	12	125431370	125473667	N:GEXP:LMNB2:chr19:2428164:2456958:-:84823	LMNB2	GEXP	19	2428164	2456958	500000000	26.9	35	0.663	271
N:GEXP:DHX37:chr12:125431370:125473667:-:57647	DHX37	GEXP	12	125431370	125473667	N:GEXP:WDR46:chr6:33246880:33257304:-:9277	WDR46	GEXP	6	33246880	33257304	500000000	24.9	33	0.648	271
N:GEXP:DHX37:chr12:125431370:125473667:-:57647	DHX37	GEXP	12	125431370	125473667	N:GEXP:NOP14:chr4:2939664:2965118:-:8602	NOP14	GEXP	4	2939664	2965118	500000000	24.8	32.9	0.647	271
N:GEXP:DHX37:chr12:125431370:125473667:-:57647	DHX37	GEXP	12	125431370	125473667	N:GEXP:PUS7:chr7:105096960:105162685:-:54517	PUS7	GEXP	7	105096960	105162685	500000000	22.6	30.7	0.631	271
N:GEXP:BEX4:chrX:102470020:102472128:+:56271	BEX4	GEXP	X	102470020	102472128	N:GEXP:DHX37:chr12:125431370:125473667:-:57647	DHX37	GEXP	12	125431370	125473667	500000000	20.7	28.8	-0.615	271
N:GEXP:DHX37:chr12:125431370:125473667:-:57647	DHX37	GEXP	12	125431370	125473667	N:GEXP:WDR4:chr21:44263204:44299699:-:10785	WDR4	GEXP	21	44263204	44299699	500000000	20.3	28.4	0.611	271
N:GEXP:RARRES2:chr7:150035407:150038763:-:5919	RARRES2	GEXP	7	150035407	150038763	N:METH:DHX37:chr12:125474021:::cg00910168	DHX37 cg00910168	METH	12	125474021		500000000	16.2	24.6	-0.58	267
N:GEXP:AP1S3:chr2:224620047:224702319:-:130340	AP1S3	GEXP	2	224620047	224702319	N:METH:DHX37:chr12:125474021:::cg00910168	DHX37 cg00910168	METH	12	125474021		500000000	15.9	24.4	-0.577	267
N:GEXP:TP73-AS1:chr1:3652548:3663937:-:57212	TP73-AS1	GEXP	1	3652548	3663937	N:METH:DHX37:chr12:125474021:::cg00910168	DHX37 cg00910168	METH	12	125474021		500000000	15.8	24.3	-0.576	267
N:GEXP:FERMT1:chr20:6055492:6104191:-:55612	FERMT1	GEXP	20	6055492	6104191	N:METH:DHX37:chr12:125474021:::cg00910168	DHX37 cg00910168	METH	12	125474021		500000000	15.4	23.8	0.572	267
N:GEXP:FABP5:chr8:82192718:82197012:+:2171	FABP5	GEXP	8	82192718	82197012	N:METH:DHX37:chr12:125474021:::cg00910168	DHX37 cg00910168	METH	12	125474021		500000000	14.1	22.6	-0.559	267
N:METH:DHX37:chr12:125474021:::cg00910168	DHX37 cg00910168	METH	12	125474021		N:MIRN:hsa-mir-34a-5p:chr1:9211727:9211836:+:MIMAT0000255	hsa-mir-34a-5p	MIRN	1	9211727	9211836	500000000	15.1	22.2	-0.534	292
N:GEXP:RBP1:chr3:139236276:139258671:-:5947	RBP1	GEXP	3	139236276	139258671	N:METH:DHX37:chr12:125474021:::cg00910168	DHX37 cg00910168	METH	12	125474021		500000000	13.4	21.9	-0.551	267
N:GEXP:KHNYN:chr14:24898492:24910547:+:23351	KHNYN	GEXP	14	24898492	24910547	N:METH:DHX37:chr12:125474021:::cg00910168	DHX37 cg00910168	METH	12	125474021		500000000	13.4	21.8	-0.551	267
N:GEXP:AQP5:chr12:50355279:50359461:+:362	AQP5	GEXP	12	50355279	50359461	N:METH:DHX37:chr12:125474021:::cg00910168	DHX37 cg00910168	METH	12	125474021		75114560	12.9	21.4	-0.546	267
N:GEXP:SSH3:chr11:67070919:67080078:+:54961	SSH3	GEXP	11	67070919	67080078	N:METH:DHX37:chr12:125474021:::cg00910168	DHX37 cg00910168	METH	12	125474021		500000000	12.9	21.3	-0.545	267
N:GEXP:RAB3D:chr19:11432722:11450344:-:9545	RAB3D	GEXP	19	11432722	11450344	N:METH:DHX37:chr12:125474021:::cg00910168	DHX37 cg00910168	METH	12	125474021		500000000	12.5	21	-0.541	267
N:METH:DHX37:chr12:125474021:::cg00910168	DHX37 cg00910168	METH	12	125474021		N:MIRN:hsa-mir-22-5p:chr17:1617197:1617281:+:MIMAT0004495	hsa-mir-22-5p	MIRN	17	1617197	1617281	500000000	12.8	19.9	-0.509	292
N:METH:DHX37:chr12:125474021:::cg00910168	DHX37 cg00910168	METH	12	125474021		N:MIRN:hsa-mir-146b-3p:chr10:104196269:104196341:+:MIMAT0004766	hsa-mir-146b-3p	MIRN	10	104196269	104196341	500000000	11.2	18.3	-0.49	292
N:METH:DHX37:chr12:125474021:::cg00910168	DHX37 cg00910168	METH	12	125474021		N:MIRN:hsa-mir-221-3p:chrx:45605585:45605694:+:MIMAT0000278	hsa-mir-221-3p	MIRN	x	45605585	45605694	500000000	9.6	16.8	-0.47	292
N:METH:DHX37:chr12:125474021:::cg00910168	DHX37 cg00910168	METH	12	125474021		B:SAMP:I(IDH_WT|IDHrelatedGroup):::::	IDHrelatedGroup IDH_WT	SAMP				500000000	9.7	16.4	-0.518	265
N:GEXP:DHX37:chr12:125431370:125473667:-:57647	DHX37	GEXP	12	125431370	125473667	N:RPPA:RBM15:chr1:110881945:110889303:+:RBM15-R-V	RBM15	RPPA	1	110881945	110889303	500000000	9.5	15.9	0.486	257
N:METH:DHX37:chr12:125474021:::cg00910168	DHX37 cg00910168	METH	12	125474021		C:SAMP:IDHrelatedGroup:::::	IDHrelatedGroup	SAMP				500000000	10.1	15.6		265
N:METH:DHX37:chr12:125474021:::cg00910168	DHX37 cg00910168	METH	12	125474021		N:MIRN:hsa-mir-625-3p:chr14:65937820:65937904:+:MIMAT0004808	hsa-mir-625-3p	MIRN	14	65937820	65937904	500000000	8.3	15.4	-0.452	292
N:METH:DHX37:chr12:125474021:::cg00910168	DHX37 cg00910168	METH	12	125474021		N:RPPA:ERBB2:chr17:37844393:37884915:+:HER2-M-V	ERBB2	RPPA	17	37844393	37884915	500000000	8.6	15.2	-0.479	253
N:METH:DHX37:chr12:125474021:::cg00910168	DHX37 cg00910168	METH	12	125474021		B:SAMP:I(IDH1_IDH2_MUTANT_1P_19Q_INTACT,IDH_WT|IDHrelatedGroup):::::	IDHrelatedGroup IDH1_IDH2_MUTANT_1P_19Q_INTACT vs IDH_WT	SAMP				500000000	8.5	15.2	0.58	195
N:METH:DHX37:chr12:125474021:::cg00910168	DHX37 cg00910168	METH	12	125474021		N:MIRN:hsa-mir-365a-3p:chr16:14403142:14403228:+:MIMAT0000710	hsa-mir-365a-3p	MIRN	16	14403142	14403228	500000000	7.5	14.7	-0.442	292
N:METH:DHX37:chr12:125474021:::cg00910168	DHX37 cg00910168	METH	12	125474021		N:MIRN:hsa-mir-22-3p:chr17:1617197:1617281:+:MIMAT0000077	hsa-mir-22-3p	MIRN	17	1617197	1617281	500000000	7.5	14.6	-0.441	292
N:METH:DHX37:chr12:125474021:::cg00910168	DHX37 cg00910168	METH	12	125474021		N:MIRN:hsa-mir-146b-5p:chr10:104196269:104196341:+:MIMAT0002809	hsa-mir-146b-5p	MIRN	10	104196269	104196341	500000000	7.3	14.4	-0.438	292
N:METH:DHX37:chr12:125474021:::cg00910168	DHX37 cg00910168	METH	12	125474021		N:MIRN:hsa-mir-1976:chr1:26881033:26881084:+:MIMAT0009451	hsa-mir-1976	MIRN	1	26881033	26881084	500000000	7	14.1	-0.434	292
N:METH:DHX37:chr12:125474021:::cg00910168	DHX37 cg00910168	METH	12	125474021		N:MIRN:hsa-mir-222-3p:chrx:45606421:45606530:+:MIMAT0000279	hsa-mir-222-3p	MIRN	x	45606421	45606530	500000000	6.9	14.1	-0.433	292
N:METH:DHX37:chr12:125474021:::cg00910168	DHX37 cg00910168	METH	12	125474021		N:MIRN:hsa-mir-574-3p:chr4:38869653:38869748:+:MIMAT0003239	hsa-mir-574-3p	MIRN	4	38869653	38869748	500000000	6.7	13.9	-0.431	292
N:METH:DHX37:chr12:125474021:::cg00910168	DHX37 cg00910168	METH	12	125474021		B:SAMP:IDH1_mut:::::	IDH1_mut	SAMP				500000000	7.2	13.9	0.456	287
N:METH:DHX37:chr12:125474021:::cg00910168	DHX37 cg00910168	METH	12	125474021		N:MIRN:hsa-mir-664a-3p:chr1:220373880:220373961:+:MIMAT0005949	hsa-mir-664a-3p	MIRN	1	220373880	220373961	500000000	6.6	13.8	-0.429	292
N:METH:DHX37:chr12:125474021:::cg00910168	DHX37 cg00910168	METH	12	125474021		N:MIRN:hsa-mir-651:chrx:8095006:8095102:+:MIMAT0003321	hsa-mir-651	MIRN	x	8095006	8095102	500000000	6.5	13.7	-0.428	292
N:METH:DHX37:chr12:125474021:::cg00910168	DHX37 cg00910168	METH	12	125474021		N:MIRN:hsa-mir-1266:chr15:52569314:52569397:+:MIMAT0005920	hsa-mir-1266	MIRN	15	52569314	52569397	500000000	6.1	13.3	-0.421	292
N:METH:DHX37:chr12:125474021:::cg00910168	DHX37 cg00910168	METH	12	125474021		N:MIRN:hsa-mir-766-3p:chrx:118780701:118780811:+:MIMAT0003888	hsa-mir-766-3p	MIRN	x	118780701	118780811	500000000	5.7	12.8	-0.414	292
N:METH:DHX37:chr12:125474021:::cg00910168	DHX37 cg00910168	METH	12	125474021		N:MIRN:hsa-mir-199b-5p:chr9:131007000:131007109:+:MIMAT0000263	hsa-mir-199b-5p	MIRN	9	131007000	131007109	500000000	5.4	12.6	-0.41	292
N:METH:DHX37:chr12:125474021:::cg00910168	DHX37 cg00910168	METH	12	125474021		N:MIRN:hsa-mir-2355-5p:chr2:207974711:207974797:+:MIMAT0016895	hsa-mir-2355-5p	MIRN	2	207974711	207974797	500000000	5.2	12.3	-0.406	292
N:GEXP:DHX37:chr12:125431370:125473667:-:57647	DHX37	GEXP	12	125431370	125473667	N:RPPA:ATM:chr11:108093559:108239826:+:ATM-R-E	ATM	RPPA	11	108093559	108239826	500000000	5.8	12.3	0.43	257
N:GEXP:DHX37:chr12:125431370:125473667:-:57647	DHX37	GEXP	12	125431370	125473667	N:RPPA:XRCC5:chr2:216974020:217071016:+:Ku80-R-C	XRCC5	RPPA	2	216974020	217071016	500000000	5.7	12.1	0.428	257
N:METH:DHX37:chr12:125474021:::cg00910168	DHX37 cg00910168	METH	12	125474021		N:MIRN:hsa-mir-34b-3p:chr11:111383663:111383746:+:MIMAT0004676	hsa-mir-34b-3p	MIRN	11	111383663	111383746	500000000	4.7	11.8	-0.398	292
N:METH:DHX37:chr12:125474021:::cg00910168	DHX37 cg00910168	METH	12	125474021		N:MIRN:hsa-mir-148a-3p:chr7:25989539:25989606:+:MIMAT0000243	hsa-mir-148a-3p	MIRN	7	25989539	25989606	500000000	4.6	11.7	-0.396	292
N:METH:DHX37:chr12:125474021:::cg00910168	DHX37 cg00910168	METH	12	125474021		C:SAMP:LGG-TP_meth_CNMF_4:::::	LGG-TP_meth_CNMF_4	SAMP				500000000	6.1	11.6		225
N:METH:DHX37:chr12:125474021:::cg00910168	DHX37 cg00910168	METH	12	125474021		N:MIRN:hsa-mir-155-5p:chr21:26946292:26946356:+:MIMAT0000646	hsa-mir-155-5p	MIRN	21	26946292	26946356	500000000	4.3	11.5	-0.392	292
N:METH:DHX37:chr12:125474021:::cg00910168	DHX37 cg00910168	METH	12	125474021		N:MIRN:hsa-mir-99b-5p:chr19:52195865:52195934:+:MIMAT0000689	hsa-mir-99b-5p	MIRN	19	52195865	52195934	500000000	4.2	11.4	-0.391	292
N:GEXP:DHX37:chr12:125431370:125473667:-:57647	DHX37	GEXP	12	125431370	125473667	N:MIRN:hsa-mir-29c-5p:chr1:207975197:207975284:+:MIMAT0004673	hsa-mir-29c-5p	MIRN	1	207975197	207975284	500000000	4.3	11.4	-0.404	271
N:GEXP:DHX37:chr12:125431370:125473667:-:57647	DHX37	GEXP	12	125431370	125473667	N:RPPA:XRCC1:chr19:44047464:44079730:-:XRCC1-R-E	XRCC1	RPPA	19	44047464	44079730	500000000	4.6	11.1	0.409	257
N:METH:DHX37:chr12:125474021:::cg00910168	DHX37 cg00910168	METH	12	125474021		N:MIRN:hsa-mir-9-5p:chr1:156390133:156390221:+:MIMAT0000441	hsa-mir-9-5p	MIRN	1	156390133	156390221	500000000	3.8	11	0.384	292
N:METH:DHX37:chr12:125474021:::cg00910168	DHX37 cg00910168	METH	12	125474021		B:SAMP:I(IDH1_IDH2_MUTANT_1P_19Q_CO-DELETED,IDH_WT|IDHrelatedGroup):::::	IDHrelatedGroup IDH1_IDH2_MUTANT_1P_19Q_CO-DELETED vs IDH_WT	SAMP				500000000	4.3	11	0.599	130
N:GEXP:DHX37:chr12:125431370:125473667:-:57647	DHX37	GEXP	12	125431370	125473667	N:RPPA:RAD50:chr5:131891711:131980313:+:Rad50-M-V	RAD50	RPPA	5	131891711	131980313	500000000	4.4	10.9	0.406	257
N:METH:DHX37:chr12:125474021:::cg00910168	DHX37 cg00910168	METH	12	125474021		N:MIRN:hsa-mir-24-1-5p:chr9:97848303:97848370:+:MIMAT0000079	hsa-mir-24-1-5p	MIRN	9	97848303	97848370	500000000	3.7	10.9	-0.382	292
N:METH:DHX37:chr12:125474021:::cg00910168	DHX37 cg00910168	METH	12	125474021		N:SAMP:mirnFracON_5:::::	mirnFracON_5	SAMP				500000000	4.9	10.9	-0.382	292
N:METH:DHX37:chr12:125474021:::cg00910168	DHX37 cg00910168	METH	12	125474021		N:SAMP:mirnFracON_4:::::	mirnFracON_4	SAMP				500000000	4.8	10.8	-0.381	292
N:METH:DHX37:chr12:125474021:::cg00910168	DHX37 cg00910168	METH	12	125474021		N:MIRN:hsa-mir-149-5p:chr2:241395418:241395506:+:MIMAT0000450	hsa-mir-149-5p	MIRN	2	241395418	241395506	500000000	3.5	10.7	-0.379	292
N:METH:DHX37:chr12:125474021:::cg00910168	DHX37 cg00910168	METH	12	125474021		N:MIRN:hsa-mir-31-5p:chr9:21512114:21512184:+:MIMAT0000089	hsa-mir-31-5p	MIRN	9	21512114	21512184	500000000	3.6	10.7	-0.38	292
N:METH:DHX37:chr12:125474021:::cg00910168	DHX37 cg00910168	METH	12	125474021		N:SAMP:mirnFracON_8:::::	mirnFracON_8	SAMP				500000000	4.7	10.6	-0.378	292
N:METH:DHX37:chr12:125474021:::cg00910168	DHX37 cg00910168	METH	12	125474021		N:MIRN:hsa-mir-222-5p:chrx:45606421:45606530:+:MIMAT0004569	hsa-mir-222-5p	MIRN	x	45606421	45606530	500000000	3.4	10.5	-0.376	292
N:METH:DHX37:chr12:125474021:::cg00910168	DHX37 cg00910168	METH	12	125474021		N:MIRN:hsa-mir-1287:chr10:100154975:100155064:+:MIMAT0005878	hsa-mir-1287	MIRN	10	100154975	100155064	500000000	3.3	10.4	-0.375	292
N:CNVR:7q22.1:chr7:91541000:105888999::	chr7:91,541,000-105,888,999 (14bp, 7q22.1)	CNVR	7	91541000	105888999	N:GEXP:DHX37:chr12:125431370:125473667:-:57647	DHX37	GEXP	12	125431370	125473667	500000000	3.2	10.4	0.39	268
N:GEXP:DHX37:chr12:125431370:125473667:-:57647	DHX37	GEXP	12	125431370	125473667	N:MIRN:hsa-mir-92a-1-5p:chr13:92003568:92003645:+:MIMAT0004507	hsa-mir-92a-1-5p	MIRN	13	92003568	92003645	500000000	3.2	10.2	0.383	271
B:GNAB:IDH1:chr2:209100953:209119806:-:code_potential_somatic	IDH1 - Protein Coding	GNAB	2	209100953	209119806	N:METH:DHX37:chr12:125474021:::cg00910168	DHX37 cg00910168	METH	12	125474021		500000000	2	10.2	0.448	213
B:GNAB:IDH1:chr2:209100953:209119806:-:dom_11_399_somatic	IDH1 - dom 11_399_somatic	GNAB	2	209100953	209119806	N:METH:DHX37:chr12:125474021:::cg00910168	DHX37 cg00910168	METH	12	125474021		500000000	2	10.2	0.448	213
B:GNAB:IDH1:chr2:209100953:209119806:-:nonsilent_somatic	IDH1 - Excluding Silent Mutations	GNAB	2	209100953	209119806	N:METH:DHX37:chr12:125474021:::cg00910168	DHX37 cg00910168	METH	12	125474021		500000000	2	10.2	0.448	213
B:GNAB:IDH1:chr2:209100953:209119806:-:missense_somatic	IDH1 - Missense	GNAB	2	209100953	209119806	N:METH:DHX37:chr12:125474021:::cg00910168	DHX37 cg00910168	METH	12	125474021		500000000	2	10.2	0.448	213
B:GNAB:IDH1:chr2:209100953:209119806:-:y_n_somatic	IDH1 - All Mutations	GNAB	2	209100953	209119806	N:METH:DHX37:chr12:125474021:::cg00910168	DHX37 cg00910168	METH	12	125474021		500000000	2	10.2	0.448	213
N:METH:DHX37:chr12:125474021:::cg00910168	DHX37 cg00910168	METH	12	125474021		N:MIRN:hsa-mir-1468:chrx:63005882:63005967:+:MIMAT0006789	hsa-mir-1468	MIRN	x	63005882	63005967	500000000	3.1	10.2	-0.37	292
N:METH:DHX37:chr12:125474021:::cg00910168	DHX37 cg00910168	METH	12	125474021		N:MIRN:hsa-mir-27b-5p:chr9:97847727:97847823:+:MIMAT0004588	hsa-mir-27b-5p	MIRN	9	97847727	97847823	500000000	3	10.2	-0.37	292
B:GNAB:IDH1:chr2:209100953:209119806:-:mnf_somatic	IDH1 - Missense-Nonsense-Frameshift	GNAB	2	209100953	209119806	N:METH:DHX37:chr12:125474021:::cg00910168	DHX37 cg00910168	METH	12	125474021		500000000	2	10.2	0.448	213
N:METH:DHX37:chr12:125474021:::cg00910168	DHX37 cg00910168	METH	12	125474021		N:MIRN:hsa-mir-34c-3p:chr11:111384164:111384240:+:MIMAT0004677	hsa-mir-34c-3p	MIRN	11	111384164	111384240	500000000	3.1	10.2	-0.37	292
B:GNAB:IDH1:chr2:209100953:209119806:-:mni_somatic	IDH1 - Missense-Nonsense-Inframe-Frameshift	GNAB	2	209100953	209119806	N:METH:DHX37:chr12:125474021:::cg00910168	DHX37 cg00910168	METH	12	125474021		500000000	2	10.2	0.448	213
N:GEXP:DHX37:chr12:125431370:125473667:-:57647	DHX37	GEXP	12	125431370	125473667	N:RPPA:NRG1:chr8:31496911:32622558:+:Heregulin-R-V	NRG1	RPPA	8	31496911	32622558	500000000	3.6	10.1	-0.391	257
N:GEXP:DHX37:chr12:125431370:125473667:-:57647	DHX37	GEXP	12	125431370	125473667	N:RPPA:CCNB1:chr5:68462837:68474070:+:Cyclin_B1-R-V	CCNB1	RPPA	5	68462837	68474070	500000000	3.6	10.1	0.391	257
N:GEXP:DHX37:chr12:125431370:125473667:-:57647	DHX37	GEXP	12	125431370	125473667	N:RPPA:BAP1:chr3:52435025:52444009:-:Bap1-c-4-M-E	BAP1	RPPA	3	52435025	52444009	500000000	3.7	10.1	0.392	257
N:METH:DHX37:chr12:125474021:::cg00910168	DHX37 cg00910168	METH	12	125474021		N:MIRN:hsa-mir-34c-5p:chr11:111384164:111384240:+:MIMAT0000686	hsa-mir-34c-5p	MIRN	11	111384164	111384240	500000000	3	10.1	-0.369	292
N:METH:DHX37:chr12:125474021:::cg00910168	DHX37 cg00910168	METH	12	125474021		N:MIRN:hsa-mir-1228-5p:chr12:57588287:57588359:+:MIMAT0005582	hsa-mir-1228-5p	MIRN	12	57588287	57588359	67885662	3	10.1	-0.369	292
N:METH:DHX37:chr12:125474021:::cg00910168	DHX37 cg00910168	METH	12	125474021		N:MIRN:hsa-mir-212-3p:chr17:1953565:1953674:+:MIMAT0000269	hsa-mir-212-3p	MIRN	17	1953565	1953674	500000000	2.8	9.9	-0.365	292
N:METH:DHX37:chr12:125474021:::cg00910168	DHX37 cg00910168	METH	12	125474021		N:MIRN:hsa-mir-200a-5p:chr1:1103243:1103332:+:MIMAT0001620	hsa-mir-200a-5p	MIRN	1	1103243	1103332	500000000	2.7	9.9	-0.364	292
N:METH:DHX37:chr12:125474021:::cg00910168	DHX37 cg00910168	METH	12	125474021		N:SAMP:mirnFracON_7:::::	mirnFracON_7	SAMP				500000000	3.9	9.9	-0.365	292
N:METH:DHX37:chr12:125474021:::cg00910168	DHX37 cg00910168	METH	12	125474021		N:RPPA:PEA15:chr1:160175125:160185162:+:PEA15-R-V	PEA15	RPPA	1	160175125	160185162	500000000	3.2	9.8	0.388	253
N:METH:DHX37:chr12:125474021:::cg00910168	DHX37 cg00910168	METH	12	125474021		N:MIRN:hsa-mir-99b-3p:chr19:52195865:52195934:+:MIMAT0004678	hsa-mir-99b-3p	MIRN	19	52195865	52195934	500000000	2.7	9.8	-0.363	292
N:METH:DHX37:chr12:125474021:::cg00910168	DHX37 cg00910168	METH	12	125474021		N:MIRN:hsa-mir-187-3p:chr18:33484781:33484889:+:MIMAT0000262	hsa-mir-187-3p	MIRN	18	33484781	33484889	500000000	2.7	9.8	-0.363	292
N:CNVR:7q31.1:chr7:105891000:158385000::	chr7:105,891,000-158,385,000 (52bp, 7q31.1)	CNVR	7	105891000	158385000	N:GEXP:DHX37:chr12:125431370:125473667:-:57647	DHX37	GEXP	12	125431370	125473667	500000000	2.5	9.8	0.377	268
N:METH:DHX37:chr12:125474021:::cg00910168	DHX37 cg00910168	METH	12	125474021		N:SAMP:mirnFracON_3:::::	mirnFracON_3	SAMP				500000000	3.9	9.8	-0.363	292
N:METH:DHX37:chr12:125474021:::cg00910168	DHX37 cg00910168	METH	12	125474021		N:SAMP:mirnFracON_9:::::	mirnFracON_9	SAMP				500000000	3.8	9.8	-0.362	292
N:METH:DHX37:chr12:125474021:::cg00910168	DHX37 cg00910168	METH	12	125474021		N:SAMP:mirnFracON_6:::::	mirnFracON_6	SAMP				500000000	3.9	9.8	-0.364	292
N:METH:DHX37:chr12:125474021:::cg00910168	DHX37 cg00910168	METH	12	125474021		N:MIRN:hsa-mir-1179:chr15:89151338:89151428:+:MIMAT0005824	hsa-mir-1179	MIRN	15	89151338	89151428	500000000	2.6	9.7	-0.361	292
N:CNVR:7q21.11:chr7:75439000:91540999::	chr7:75,439,000-91,540,999 (16bp, 7q21.11)	CNVR	7	75439000	91540999	N:GEXP:DHX37:chr12:125431370:125473667:-:57647	DHX37	GEXP	12	125431370	125473667	500000000	2.4	9.7	0.376	268
N:METH:DHX37:chr12:125474021:::cg00910168	DHX37 cg00910168	METH	12	125474021		B:SAMP:I(C1,C2|LGG-TP_meth_CNMF_4):::::	LGG-TP_meth_CNMF_4 C1 vs C2	SAMP				500000000	3	9.7	0.54	140
N:METH:DHX37:chr12:125474021:::cg00910168	DHX37 cg00910168	METH	12	125474021		N:MIRN:hsa-mir-34a-3p:chr1:9211727:9211836:+:MIMAT0004557	hsa-mir-34a-3p	MIRN	1	9211727	9211836	500000000	2.4	9.6	-0.359	292
N:CNVR:7p14.1:chr7:39914000:45861999::	chr7:39,914,000-45,861,999 (6bp, 7p14.1)	CNVR	7	39914000	45861999	N:GEXP:DHX37:chr12:125431370:125473667:-:57647	DHX37	GEXP	12	125431370	125473667	500000000	2.3	9.6	0.374	268
N:METH:DHX37:chr12:125474021:::cg00910168	DHX37 cg00910168	METH	12	125474021		N:MIRN:hsa-mir-31-3p:chr9:21512114:21512184:+:MIMAT0004504	hsa-mir-31-3p	MIRN	9	21512114	21512184	500000000	2.5	9.6	-0.36	292
N:METH:DHX37:chr12:125474021:::cg00910168	DHX37 cg00910168	METH	12	125474021		N:MIRN:hsa-mir-15b-3p:chr3:160122376:160122473:+:MIMAT0004586	hsa-mir-15b-3p	MIRN	3	160122376	160122473	500000000	2.5	9.6	-0.36	292
N:METH:DHX37:chr12:125474021:::cg00910168	DHX37 cg00910168	METH	12	125474021		N:MIRN:hsa-mir-145-5p:chr5:148810209:148810296:+:MIMAT0000437	hsa-mir-145-5p	MIRN	5	148810209	148810296	500000000	2.5	9.6	-0.359	292
N:CNVR:7p11.2:chr7:55225000:55269999::	chr7:55,225,000-55,269,999 (45Mb, 7p11.2)	CNVR	7	55225000	55269999	N:GEXP:DHX37:chr12:125431370:125473667:-:57647	DHX37	GEXP	12	125431370	125473667	500000000	2.2	9.5	0.371	268
N:CNVR:7p11.2:chr7:55277000:55291999::	chr7:55,277,000-55,291,999 (15Mb, 7p11.2)	CNVR	7	55277000	55291999	N:GEXP:DHX37:chr12:125431370:125473667:-:57647	DHX37	GEXP	12	125431370	125473667	500000000	2.2	9.5	0.371	268
N:CNVR:7p11.2:chr7:55271000:55276999::	chr7:55,271,000-55,276,999 (6Mb, 7p11.2)	CNVR	7	55271000	55276999	N:GEXP:DHX37:chr12:125431370:125473667:-:57647	DHX37	GEXP	12	125431370	125473667	500000000	2.2	9.5	0.371	268
N:CNVR:7p11.2:chr7:55292000:55345999::	chr7:55,292,000-55,345,999 (54Mb, 7p11.2)	CNVR	7	55292000	55345999	N:GEXP:DHX37:chr12:125431370:125473667:-:57647	DHX37	GEXP	12	125431370	125473667	500000000	2.3	9.5	0.373	268
N:CNVR:7p11.2:chr7:55346000:55374999::	chr7:55,346,000-55,374,999 (29Mb, 7p11.2)	CNVR	7	55346000	55374999	N:GEXP:DHX37:chr12:125431370:125473667:-:57647	DHX37	GEXP	12	125431370	125473667	500000000	2.2	9.5	0.372	268
N:CNVR:7p14:chr7:30028000:39912999::	chr7:30,028,000-39,912,999 (10bp, 7p14)	CNVR	7	30028000	39912999	N:GEXP:DHX37:chr12:125431370:125473667:-:57647	DHX37	GEXP	12	125431370	125473667	500000000	2.3	9.5	0.373	268
N:CNVR:7p11.2:chr7:54939000:54950999::	chr7:54,939,000-54,950,999 (12Mb, 7p11.2)	CNVR	7	54939000	54950999	N:GEXP:DHX37:chr12:125431370:125473667:-:57647	DHX37	GEXP	12	125431370	125473667	500000000	2.2	9.5	0.372	268
N:CNVR:7p11.2:chr7:54953000:55123999::	chr7:54,953,000-55,123,999 (171Mb, 7p11.2)	CNVR	7	54953000	55123999	N:GEXP:DHX37:chr12:125431370:125473667:-:57647	DHX37	GEXP	12	125431370	125473667	500000000	2.2	9.5	0.371	268
N:METH:DHX37:chr12:125474021:::cg00910168	DHX37 cg00910168	METH	12	125474021		N:RPPA:IGFBP2:chr2:217498127:217529158:+:IGFBP2-R-V	IGFBP2	RPPA	2	217498127	217529158	500000000	3	9.5	-0.383	253
N:METH:DHX37:chr12:125474021:::cg00910168	DHX37 cg00910168	METH	12	125474021		N:MIRN:hsa-mir-145-3p:chr5:148810209:148810296:+:MIMAT0004601	hsa-mir-145-3p	MIRN	5	148810209	148810296	500000000	2.4	9.5	-0.357	292
N:METH:DHX37:chr12:125474021:::cg00910168	DHX37 cg00910168	METH	12	125474021		N:MIRN:hsa-mir-425-5p:chr3:49057581:49057667:+:MIMAT0003393	hsa-mir-425-5p	MIRN	3	49057581	49057667	500000000	2.2	9.4	-0.355	292
N:METH:DHX37:chr12:125474021:::cg00910168	DHX37 cg00910168	METH	12	125474021		N:MIRN:hsa-mir-221-5p:chrx:45605585:45605694:+:MIMAT0004568	hsa-mir-221-5p	MIRN	x	45605585	45605694	500000000	2.3	9.4	-0.356	292
N:CNVR:7p11.2:chr7:55375000:55391999::	chr7:55,375,000-55,391,999 (17Mb, 7p11.2)	CNVR	7	55375000	55391999	N:GEXP:DHX37:chr12:125431370:125473667:-:57647	DHX37	GEXP	12	125431370	125473667	500000000	2.2	9.4	0.371	268
N:GEXP:DHX37:chr12:125431370:125473667:-:57647	DHX37	GEXP	12	125431370	125473667	N:MIRN:hsa-mir-10b-5p:chr2:177015031:177015140:+:MIMAT0000254	hsa-mir-10b-5p	MIRN	2	177015031	177015140	500000000	2.4	9.4	0.369	271
N:METH:DHX37:chr12:125474021:::cg00910168	DHX37 cg00910168	METH	12	125474021		C:SAMP:LGG-TP_mRNAseq_CNMF_5:::::	LGG-TP_mRNAseq_CNMF_5	SAMP				500000000	3.9	9.4		213
N:CNVR:RASA4:chr7:45862000:45864999::	chr7:45,862,000-45,864,999 (3Mb, RASA4)	CNVR	7	45862000	45864999	N:GEXP:DHX37:chr12:125431370:125473667:-:57647	DHX37	GEXP	12	125431370	125473667	500000000	2	9.3	0.368	268
N:METH:DHX37:chr12:125474021:::cg00910168	DHX37 cg00910168	METH	12	125474021		N:MIRN:hsa-mir-149-3p:chr2:241395418:241395506:+:MIMAT0004609	hsa-mir-149-3p	MIRN	2	241395418	241395506	500000000	2.2	9.3	-0.354	292
N:METH:DHX37:chr12:125474021:::cg00910168	DHX37 cg00910168	METH	12	125474021		N:MIRN:hsa-mir-200a-3p:chr1:1103243:1103332:+:MIMAT0000682	hsa-mir-200a-3p	MIRN	1	1103243	1103332	500000000	2.2	9.3	-0.354	292
N:GEXP:DHX37:chr12:125431370:125473667:-:57647	DHX37	GEXP	12	125431370	125473667	N:MIRN:hsa-mir-203a:chr14:104583742:104583851:+:MIMAT0000264	hsa-mir-203a	MIRN	14	104583742	104583851	500000000	2.2	9.2	-0.365	271
N:METH:DHX37:chr12:125474021:::cg00910168	DHX37 cg00910168	METH	12	125474021		N:MIRN:hsa-let-7f-1-3p:chr9:96938629:96938715:+:MIMAT0004486	hsa-let-7f-1-3p	MIRN	9	96938629	96938715	500000000	2.1	9.2	-0.353	292
N:CNVR:7p11.2:chr7:55138000:55178999::	chr7:55,138,000-55,178,999 (41Mb, 7p11.2)	CNVR	7	55138000	55178999	N:GEXP:DHX37:chr12:125431370:125473667:-:57647	DHX37	GEXP	12	125431370	125473667	500000000	2	9.2	0.367	268
N:CNVR:7p11.2:chr7:55124000:55133999::	chr7:55,124,000-55,133,999 (10Mb, 7p11.2)	CNVR	7	55124000	55133999	N:GEXP:DHX37:chr12:125431370:125473667:-:57647	DHX37	GEXP	12	125431370	125473667	500000000	2	9.2	0.367	268
N:CNVR:7p11.2:chr7:55392000:55552999::	chr7:55,392,000-55,552,999 (161Mb, 7p11.2)	CNVR	7	55392000	55552999	N:GEXP:DHX37:chr12:125431370:125473667:-:57647	DHX37	GEXP	12	125431370	125473667	500000000	2	9.2	0.367	268
N:CNVR:7p11.2:chr7:54951000:54952999::	chr7:54,951,000-54,952,999 (2Mb, 7p11.2)	CNVR	7	54951000	54952999	N:GEXP:DHX37:chr12:125431370:125473667:-:57647	DHX37	GEXP	12	125431370	125473667	500000000	2	9.2	0.367	267
N:CNVR:7p12:chr7:45865000:53045999::	chr7:45,865,000-53,045,999 (7bp, 7p12)	CNVR	7	45865000	53045999	N:GEXP:DHX37:chr12:125431370:125473667:-:57647	DHX37	GEXP	12	125431370	125473667	500000000	2	9.2	0.366	268
N:CNVR:NAMPT:chr7:105889000:105890999::	chr7:105,889,000-105,890,999 (2Mb, NAMPT)	CNVR	7	105889000	105890999	N:GEXP:DHX37:chr12:125431370:125473667:-:57647	DHX37	GEXP	12	125431370	125473667	500000000	2	9.2	0.366	268
N:GEXP:DHX37:chr12:125431370:125473667:-:57647	DHX37	GEXP	12	125431370	125473667	N:SAMP:percent_tumor_nuclei:::::	percent_tumor_nuclei	SAMP				500000000	3.4	9.2	0.365	271
N:METH:DHX37:chr12:125474021:::cg00910168	DHX37 cg00910168	METH	12	125474021		N:MIRN:hsa-mir-204-5p:chr9:73424891:73425000:+:MIMAT0000265	hsa-mir-204-5p	MIRN	9	73424891	73425000	500000000	1.9	9.1	-0.349	292
N:METH:DHX37:chr12:125474021:::cg00910168	DHX37 cg00910168	METH	12	125474021		N:MIRN:hsa-mir-200b-3p:chr1:1102484:1102578:+:MIMAT0000318	hsa-mir-200b-3p	MIRN	1	1102484	1102578	500000000	1.9	9.1	-0.349	292
N:GEXP:DHX37:chr12:125431370:125473667:-:57647	DHX37	GEXP	12	125431370	125473667	N:RPPA:EEF2K:chr16:22217592:22300066:+:eEF2K-R-V	EEF2K	RPPA	16	22217592	22300066	500000000	2.6	9.1	0.371	257
N:METH:DHX37:chr12:125474021:::cg00910168	DHX37 cg00910168	METH	12	125474021		N:MIRN:hsa-mir-361-5p:chrx:85158641:85158712:+:MIMAT0000703	hsa-mir-361-5p	MIRN	x	85158641	85158712	500000000	1.9	9.1	-0.349	292
N:METH:DHX37:chr12:125474021:::cg00910168	DHX37 cg00910168	METH	12	125474021		N:MIRN:hsa-mir-501-3p:chrx:49774330:49774413:+:MIMAT0004774	hsa-mir-501-3p	MIRN	x	49774330	49774413	500000000	1.9	9	-0.348	292
N:CNVR:7p11.2:chr7:54905000:54938999::	chr7:54,905,000-54,938,999 (34Mb, 7p11.2)	CNVR	7	54905000	54938999	N:GEXP:DHX37:chr12:125431370:125473667:-:57647	DHX37	GEXP	12	125431370	125473667	500000000	1.7	9	0.361	268
N:CNVR:7p11.2:chr7:53735000:54396999::	chr7:53,735,000-54,396,999 (662Mb, 7p11.2)	CNVR	7	53735000	54396999	N:GEXP:DHX37:chr12:125431370:125473667:-:57647	DHX37	GEXP	12	125431370	125473667	500000000	1.7	9	0.362	268
N:CNVR:SCRN1:chr7:30005000:30027999::	chr7:30,005,000-30,027,999 (23Mb, SCRN1)	CNVR	7	30005000	30027999	N:GEXP:DHX37:chr12:125431370:125473667:-:57647	DHX37	GEXP	12	125431370	125473667	500000000	1.7	9	0.362	268
N:GEXP:DHX37:chr12:125431370:125473667:-:57647	DHX37	GEXP	12	125431370	125473667	N:MIRN:hsa-mir-10b-3p:chr2:177015031:177015140:+:MIMAT0004556	hsa-mir-10b-3p	MIRN	2	177015031	177015140	500000000	2	9	0.361	271
N:METH:DHX37:chr12:125474021:::cg00910168	DHX37 cg00910168	METH	12	125474021		N:MIRN:hsa-mir-582-3p:chr5:58999432:58999529:+:MIMAT0004797	hsa-mir-582-3p	MIRN	5	58999432	58999529	500000000	1.9	9	-0.348	292
N:CNVR:7p11.2:chr7:55134000:55137999::	chr7:55,134,000-55,137,999 (4Mb, 7p11.2)	CNVR	7	55134000	55137999	N:GEXP:DHX37:chr12:125431370:125473667:-:57647	DHX37	GEXP	12	125431370	125473667	500000000	1.7	9	0.363	266
N:GEXP:DHX37:chr12:125431370:125473667:-:57647	DHX37	GEXP	12	125431370	125473667	N:MIRN:hsa-mir-29c-3p:chr1:207975197:207975284:+:MIMAT0000681	hsa-mir-29c-3p	MIRN	1	207975197	207975284	500000000	2	9	-0.361	271
N:CNVR:7p14.1:chr7:39913000:39913999::	chr7:39,913,000-39,913,999 (100kb, 7p14.1)	CNVR	7	39913000	39913999	N:GEXP:DHX37:chr12:125431370:125473667:-:57647	DHX37	GEXP	12	125431370	125473667	500000000	1.7	8.9	0.361	268
N:GEXP:DHX37:chr12:125431370:125473667:-:57647	DHX37	GEXP	12	125431370	125473667	N:MIRN:hsa-mir-491-3p:chr9:20716104:20716187:+:MIMAT0004765	hsa-mir-491-3p	MIRN	9	20716104	20716187	500000000	1.9	8.9	-0.358	271
N:CNVR:7p11.2:chr7:54903000:54904999::	chr7:54,903,000-54,904,999 (2Mb, 7p11.2)	CNVR	7	54903000	54904999	N:GEXP:DHX37:chr12:125431370:125473667:-:57647	DHX37	GEXP	12	125431370	125473667	500000000	1.7	8.9	0.361	268
N:METH:DHX37:chr12:125474021:::cg00910168	DHX37 cg00910168	METH	12	125474021		N:MIRN:hsa-mir-148a-5p:chr7:25989539:25989606:+:MIMAT0004549	hsa-mir-148a-5p	MIRN	7	25989539	25989606	500000000	1.8	8.9	-0.347	292
N:METH:DHX37:chr12:125474021:::cg00910168	DHX37 cg00910168	METH	12	125474021		N:MIRN:hsa-mir-656:chr14:101533061:101533138:+:MIMAT0003332	hsa-mir-656	MIRN	14	101533061	101533138	500000000	1.7	8.9	-0.345	292
N:GEXP:DHX37:chr12:125431370:125473667:-:57647	DHX37	GEXP	12	125431370	125473667	N:MIRN:hsa-mir-139-5p:chr11:72326107:72326174:+:MIMAT0000250	hsa-mir-139-5p	MIRN	11	72326107	72326174	500000000	1.8	8.9	-0.358	271
N:CNVR:7p11.2:chr7:55711000:55779999::	chr7:55,711,000-55,779,999 (69Mb, 7p11.2)	CNVR	7	55711000	55779999	N:GEXP:DHX37:chr12:125431370:125473667:-:57647	DHX37	GEXP	12	125431370	125473667	500000000	1.5	8.8	0.358	268
N:CNVR:7p11.2:chr7:55667000:55710999::	chr7:55,667,000-55,710,999 (44Mb, 7p11.2)	CNVR	7	55667000	55710999	N:GEXP:DHX37:chr12:125431370:125473667:-:57647	DHX37	GEXP	12	125431370	125473667	500000000	1.5	8.8	0.358	268
N:GEXP:DHX37:chr12:125431370:125473667:-:57647	DHX37	GEXP	12	125431370	125473667	N:MIRN:hsa-mir-1249:chr22:45596835:45596900:+:MIMAT0005901	hsa-mir-1249	MIRN	22	45596835	45596900	500000000	1.8	8.8	-0.356	271
N:CNVR:7p11.2:chr7:55553000:55601999::	chr7:55,553,000-55,601,999 (49Mb, 7p11.2)	CNVR	7	55553000	55601999	N:GEXP:DHX37:chr12:125431370:125473667:-:57647	DHX37	GEXP	12	125431370	125473667	500000000	1.5	8.8	0.357	268
N:METH:DHX37:chr12:125474021:::cg00910168	DHX37 cg00910168	METH	12	125474021		N:MIRN:hsa-mir-1307-3p:chr10:105154010:105154158:+:MIMAT0005951	hsa-mir-1307-3p	MIRN	10	105154010	105154158	500000000	1.7	8.8	-0.345	292
N:METH:DHX37:chr12:125474021:::cg00910168	DHX37 cg00910168	METH	12	125474021		N:MIRN:hsa-mir-28-3p:chr3:188406569:188406654:+:MIMAT0004502	hsa-mir-28-3p	MIRN	3	188406569	188406654	500000000	1.6	8.8	-0.343	292
N:METH:DHX37:chr12:125474021:::cg00910168	DHX37 cg00910168	METH	12	125474021		N:MIRN:hsa-mir-655:chr14:101515887:101515983:+:MIMAT0003331	hsa-mir-655	MIRN	14	101515887	101515983	500000000	1.7	8.8	-0.344	292
N:CNVR:7p11.2:chr7:55602000:55637999::	chr7:55,602,000-55,637,999 (36Mb, 7p11.2)	CNVR	7	55602000	55637999	N:GEXP:DHX37:chr12:125431370:125473667:-:57647	DHX37	GEXP	12	125431370	125473667	500000000	1.5	8.8	0.358	268
N:CNVR:7p11.2:chr7:55780000:55860999::	chr7:55,780,000-55,860,999 (81Mb, 7p11.2)	CNVR	7	55780000	55860999	N:GEXP:DHX37:chr12:125431370:125473667:-:57647	DHX37	GEXP	12	125431370	125473667	500000000	1.5	8.8	0.357	268
N:CNVR:7p11.2:chr7:55641000:55666999::	chr7:55,641,000-55,666,999 (26Mb, 7p11.2)	CNVR	7	55641000	55666999	N:GEXP:DHX37:chr12:125431370:125473667:-:57647	DHX37	GEXP	12	125431370	125473667	500000000	1.5	8.8	0.358	268
N:GEXP:DHX37:chr12:125431370:125473667:-:57647	DHX37	GEXP	12	125431370	125473667	N:MIRN:hsa-mir-874:chr5:136983261:136983338:+:MIMAT0004911	hsa-mir-874	MIRN	5	136983261	136983338	500000000	1.8	8.8	-0.356	271
N:METH:DHX37:chr12:125474021:::cg00910168	DHX37 cg00910168	METH	12	125474021		N:MIRN:hsa-mir-769-3p:chr19:46522190:46522307:+:MIMAT0003887	hsa-mir-769-3p	MIRN	19	46522190	46522307	500000000	1.6	8.7	-0.342	292
N:METH:DHX37:chr12:125474021:::cg00910168	DHX37 cg00910168	METH	12	125474021		N:MIRN:hsa-mir-361-3p:chrx:85158641:85158712:+:MIMAT0004682	hsa-mir-361-3p	MIRN	x	85158641	85158712	500000000	1.6	8.7	-0.343	292
N:METH:DHX37:chr12:125474021:::cg00910168	DHX37 cg00910168	METH	12	125474021		N:MIRN:hsa-mir-199a-3p:chr1:172113675:172113784:+:MIMAT0000232	hsa-mir-199a-3p	MIRN	1	172113675	172113784	500000000	1.5	8.7	-0.341	292
N:CNVR:7p11.2:chr7:55181000:55224999::	chr7:55,181,000-55,224,999 (44Mb, 7p11.2)	CNVR	7	55181000	55224999	N:GEXP:DHX37:chr12:125431370:125473667:-:57647	DHX37	GEXP	12	125431370	125473667	500000000	1.4	8.7	0.355	268
N:CNVR:7p14.3:chr7:27844000:30004999::	chr7:27,844,000-30,004,999 (2bp, 7p14.3)	CNVR	7	27844000	30004999	N:GEXP:DHX37:chr12:125431370:125473667:-:57647	DHX37	GEXP	12	125431370	125473667	500000000	1.4	8.6	0.355	268
N:METH:DHX37:chr12:125474021:::cg00910168	DHX37 cg00910168	METH	12	125474021		N:MIRN:hsa-mir-487a:chr14:101518783:101518862:+:MIMAT0002178	hsa-mir-487a	MIRN	14	101518783	101518862	500000000	1.5	8.6	-0.341	292
N:METH:DHX37:chr12:125474021:::cg00910168	DHX37 cg00910168	METH	12	125474021		N:MIRN:hsa-mir-199b-3p:chr9:131007000:131007109:+:MIMAT0004563	hsa-mir-199b-3p	MIRN	9	131007000	131007109	500000000	1.4	8.6	-0.339	292
N:CNVR:TAX1BP1:chr7:27835000:27843999::	chr7:27,835,000-27,843,999 (9Mb, TAX1BP1)	CNVR	7	27835000	27843999	N:GEXP:DHX37:chr12:125431370:125473667:-:57647	DHX37	GEXP	12	125431370	125473667	500000000	1.4	8.6	0.356	267
N:METH:DHX37:chr12:125474021:::cg00910168	DHX37 cg00910168	METH	12	125474021		N:SAMP:absolute_purity:::::	absolute_purity	SAMP				500000000	2.6	8.6	0.366	248
N:GEXP:DHX37:chr12:125431370:125473667:-:57647	DHX37	GEXP	12	125431370	125473667	N:MIRN:hsa-mir-137:chr1:98511626:98511727:+:MIMAT0000429	hsa-mir-137	MIRN	1	98511626	98511727	500000000	1.5	8.5	-0.351	271
C:CLIN:batch_number:::::	batch_number	CLIN				N:METH:DHX37:chr12:125473601:::cg19793718	DHX37 cg19793718	METH	12	125473601		500000000	2.5	8.5		237
N:METH:DHX37:chr12:125474021:::cg00910168	DHX37 cg00910168	METH	12	125474021		B:SAMP:I(C2|LGG-TP_meth_CNMF_4):::::	LGG-TP_meth_CNMF_4 C2	SAMP				500000000	1.8	8.5	-0.397	225
N:METH:DHX37:chr12:125474021:::cg00910168	DHX37 cg00910168	METH	12	125474021		N:SAMP:gexpFracON_2:::::	gexpFracON_2	SAMP				500000000	2.6	8.5	-0.353	267
N:GEXP:DHX37:chr12:125431370:125473667:-:57647	DHX37	GEXP	12	125431370	125473667	N:RPPA:RPS6:chr9:19376254:19380235:-:S6-R-E	RPS6	RPPA	9	19376254	19380235	500000000	1.9	8.4	0.356	257
N:METH:DHX37:chr12:125474021:::cg00910168	DHX37 cg00910168	METH	12	125474021		N:MIRN:hsa-mir-16-2-3p:chr3:160122533:160122613:+:MIMAT0004518	hsa-mir-16-2-3p	MIRN	3	160122533	160122613	500000000	1.3	8.4	-0.336	292
N:GEXP:DHX37:chr12:125431370:125473667:-:57647	DHX37	GEXP	12	125431370	125473667	N:RPPA:RPS6KA1:chr1:26856249:26901520:+:p90RSK-R-C	RPS6KA1	RPPA	1	26856249	26901520	500000000	1.7	8.1	-0.351	257
N:METH:DHX37:chr12:125474021:::cg00910168	DHX37 cg00910168	METH	12	125474021		N:SAMP:gexpFracON_3:::::	gexpFracON_3	SAMP				500000000	2.2	8.1	-0.345	267
N:GEXP:DHX37:chr12:125431370:125473667:-:57647	DHX37	GEXP	12	125431370	125473667	N:RPPA:PDK1:chr2:173420101:173489823:+:PDK1-R-V	PDK1	RPPA	2	173420101	173489823	500000000	1.5	8	-0.347	257
N:METH:DHX37:chr12:125474021:::cg00910168	DHX37 cg00910168	METH	12	125474021		N:SAMP:mirnFracON_2:::::	mirnFracON_2	SAMP				500000000	1.9	7.8	-0.323	292
N:GEXP:DHX37:chr12:125431370:125473667:-:57647	DHX37	GEXP	12	125431370	125473667	C:SAMP:LGG-TP_meth_CNMF_4:::::	LGG-TP_meth_CNMF_4	SAMP				500000000	2.4	7.8		225
N:METH:DHX37:chr12:125474021:::cg00910168	DHX37 cg00910168	METH	12	125474021		N:SAMP:gexpFracON_1:::::	gexpFracON_1	SAMP				500000000	1.7	7.7	-0.334	267
N:GEXP:DHX37:chr12:125431370:125473667:-:57647	DHX37	GEXP	12	125431370	125473667	N:SAMP:MutSig_rateTot_perMb:::::	MutSig_rateTot_perMb	SAMP				500000000	1.4	7.2	0.36	214
N:GEXP:DHX37:chr12:125431370:125473667:-:57647	DHX37	GEXP	12	125431370	125473667	C:SAMP:LGG-TP_mRNAseq_CC_3:::::	LGG-TP_mRNAseq_CC_3	SAMP				500000000	1.7	7.1		217
N:GEXP:DHX37:chr12:125431370:125473667:-:57647	DHX37	GEXP	12	125431370	125473667	C:SAMP:LGG-TP_miRseq_CNMF_4:::::	LGG-TP_miRseq_CNMF_4	SAMP				500000000	1.4	6.8		219
Table15.SKCM
id_a	pretty_label_a	datatype_a	chr_a	start_a	end_a	id_b	pretty_label_b	datatype_b	chr_b	start_b	end_b	link_distance	adj_logged_pvalue	logged_pvalue	correlation	num_nonna
N:GEXP:DDX54:chr12:113594979:113623284:-:79039	DDX54	GEXP	12	113594979	113623284	N:GEXP:DHX37:chr12:125431371:125473668:-:57647	DHX37	GEXP	12	125431371	125473668	11808087	27.7	35.8	0.674	266
N:GEXP:DHX37:chr12:125431371:125473668:-:57647	DHX37	GEXP	12	125431371	125473668	N:GEXP:GCN1L1:chr12:120565007:120632513:-:10985	GCN1L1	GEXP	12	120565007	120632513	4798858	24.2	32.3	0.648	266
N:GEXP:DHX37:chr12:125431371:125473668:-:57647	DHX37	GEXP	12	125431371	125473668	N:GEXP:PGAM5:chr12:133287405:133299228:+:192111	PGAM5	GEXP	12	133287405	133299228	7813737	23.3	31.4	0.641	266
N:GEXP:C12orf52:chr12:113623331:113630173:+:84934	C12orf52	GEXP	12	113623331	113630173	N:GEXP:DHX37:chr12:125431371:125473668:-:57647	DHX37	GEXP	12	125431371	125473668	11801198	19.3	27.3	0.606	266
N:GEXP:DHX37:chr12:125431371:125473668:-:57647	DHX37	GEXP	12	125431371	125473668	N:GEXP:KIAA0664:chr17:2592680:2614927:-:23277	KIAA0664	GEXP	17	2592680	2614927	500000000	17.4	25.5	0.589	266
N:GEXP:AIMP2:chr7:6048876:6063465:+:7965	AIMP2	GEXP	7	6048876	6063465	N:GEXP:DHX37:chr12:125431371:125473668:-:57647	DHX37	GEXP	12	125431371	125473668	500000000	16.6	24.6	0.581	266
N:GEXP:DHX37:chr12:125431371:125473668:-:57647	DHX37	GEXP	12	125431371	125473668	N:GEXP:RBM19:chr12:114254543:114404176:-:9904	RBM19	GEXP	12	114254543	114404176	11027195	15.6	23.7	0.571	266
N:GEXP:DHX37:chr12:125431371:125473668:-:57647	DHX37	GEXP	12	125431371	125473668	N:GEXP:VARS:chr6:31745295:31763730:-:7407	VARS	GEXP	6	31745295	31763730	500000000	15.4	23.5	0.569	266
N:GEXP:DHX37:chr12:125431371:125473668:-:57647	DHX37	GEXP	12	125431371	125473668	N:GEXP:NOC4L:chr12:132628993:132637013:+:79050	NOC4L	GEXP	12	132628993	132637013	7155325	15	23.1	0.564	266
N:GEXP:DHX37:chr12:125431371:125473668:-:57647	DHX37	GEXP	12	125431371	125473668	N:GEXP:IPO4:chr14:24649425:24658170:-:79711	IPO4	GEXP	14	24649425	24658170	500000000	14.2	22.2	0.556	266
N:GEXP:DHX37:chr12:125431371:125473668:-:57647	DHX37	GEXP	12	125431371	125473668	N:GEXP:YPEL5:chr2:30369807:30383399:+:51646	YPEL5	GEXP	2	30369807	30383399	500000000	13.1	21.2	-0.544	266
N:GEXP:DHX37:chr12:125431371:125473668:-:57647	DHX37	GEXP	12	125431371	125473668	N:GEXP:INTS1:chr7:1509913:1545489:-:26173	INTS1	GEXP	7	1509913	1545489	500000000	13	21	0.543	266
N:GEXP:DHX37:chr12:125431371:125473668:-:57647	DHX37	GEXP	12	125431371	125473668	N:GEXP:GRWD1:chr19:48949030:48960279:+:83743	GRWD1	GEXP	19	48949030	48960279	500000000	12.9	20.9	0.542	266
N:GEXP:DHX37:chr12:125431371:125473668:-:57647	DHX37	GEXP	12	125431371	125473668	N:GEXP:MLXIP:chr12:122516628:122631894:+:22877	MLXIP	GEXP	12	122516628	122631894	2799477	12.1	20.2	0.533	266
N:CNVR:12q24.3:chr12:125156000:126604999::	chr12:125,156,000-126,604,999 (1bp, 12q24.3)	CNVR	12	125156000	126604999	N:GEXP:DHX37:chr12:125431371:125473668:-:57647	DHX37	GEXP	12	125431371	125473668	0	2.2	10	0.383	266
N:CNVR:NCOR2:chr12:124880000:124915999::	chr12:124,880,000-124,915,999 (36Mb, NCOR2)	CNVR	12	124880000	124915999	N:GEXP:DHX37:chr12:125431371:125473668:-:57647	DHX37	GEXP	12	125431371	125473668	515372	2	9.8	0.379	266
N:CNVR:12q24.31:chr12:121641000:121643999::	chr12:121,641,000-121,643,999 (3Mb, 12q24.31)	CNVR	12	121641000	121643999	N:GEXP:DHX37:chr12:125431371:125473668:-:57647	DHX37	GEXP	12	125431371	125473668	3787372	1.9	9.7	0.377	266
N:CNVR:12q24.31:chr12:125155000:125155999::	chr12:125,155,000-125,155,999 (100kb, 12q24.31)	CNVR	12	125155000	125155999	N:GEXP:DHX37:chr12:125431371:125473668:-:57647	DHX37	GEXP	12	125431371	125473668	275372	1.8	9.6	0.375	266
N:CNVR:NCOR2:chr12:124855000:124855999::	chr12:124,855,000-124,855,999 (100kb, NCOR2)	CNVR	12	124855000	124855999	N:GEXP:DHX37:chr12:125431371:125473668:-:57647	DHX37	GEXP	12	125431371	125473668	575372	1.8	9.6	0.375	266
N:CNVR:C12orf43:chr12:121449000:121449999::	chr12:121,449,000-121,449,999 (100kb, C12orf43)	CNVR	12	121449000	121449999	N:GEXP:DHX37:chr12:125431371:125473668:-:57647	DHX37	GEXP	12	125431371	125473668	3981372	1.8	9.6	0.375	266
N:CNVR:12q24.31:chr12:124916000:125154999::	chr12:124,916,000-125,154,999 (239Mb, 12q24.31)	CNVR	12	124916000	125154999	N:GEXP:DHX37:chr12:125431371:125473668:-:57647	DHX37	GEXP	12	125431371	125473668	276372	1.8	9.6	0.375	266
N:CNVR:NCOR2:chr12:124856000:124879999::	chr12:124,856,000-124,879,999 (24Mb, NCOR2)	CNVR	12	124856000	124879999	N:GEXP:DHX37:chr12:125431371:125473668:-:57647	DHX37	GEXP	12	125431371	125473668	551372	1.8	9.6	0.375	266
N:CNVR:12q24.32:chr12:126605000:126922999::	chr12:126,605,000-126,922,999 (318Mb, 12q24.32)	CNVR	12	126605000	126922999	N:GEXP:DHX37:chr12:125431371:125473668:-:57647	DHX37	GEXP	12	125431371	125473668	1131332	1.7	9.5	0.374	266
N:CNVR:12q24.32:chr12:128022000:129160999::	chr12:128,022,000-129,160,999 (1bp, 12q24.32)	CNVR	12	128022000	129160999	N:GEXP:DHX37:chr12:125431371:125473668:-:57647	DHX37	GEXP	12	125431371	125473668	2548332	1.6	9.4	0.372	266
N:CNVR:12q24.31:chr12:120864000:121448999::	chr12:120,864,000-121,448,999 (585Mb, 12q24.31)	CNVR	12	120864000	121448999	N:GEXP:DHX37:chr12:125431371:125473668:-:57647	DHX37	GEXP	12	125431371	125473668	3982372	1.6	9.4	0.371	266
N:CNVR:12q24.33:chr12:129473000:129473999::	chr12:129,473,000-129,473,999 (100kb, 12q24.33)	CNVR	12	129473000	129473999	N:GEXP:DHX37:chr12:125431371:125473668:-:57647	DHX37	GEXP	12	125431371	125473668	3999332	1.4	9.3	0.369	266
N:CNVR:12q24.32:chr12:129161000:129281999::	chr12:129,161,000-129,281,999 (121Mb, 12q24.32)	CNVR	12	129161000	129281999	N:GEXP:DHX37:chr12:125431371:125473668:-:57647	DHX37	GEXP	12	125431371	125473668	3687332	1.5	9.3	0.369	266
N:CNVR:12q24.3:chr12:129282000:129472999::	chr12:129,282,000-129,472,999 (191Mb, 12q24.3)	CNVR	12	129282000	129472999	N:GEXP:DHX37:chr12:125431371:125473668:-:57647	DHX37	GEXP	12	125431371	125473668	3808332	1.5	9.3	0.369	266
N:CNVR:12q24.31:chr12:121644000:124854999::	chr12:121,644,000-124,854,999 (3bp, 12q24.31)	CNVR	12	121644000	124854999	N:GEXP:DHX37:chr12:125431371:125473668:-:57647	DHX37	GEXP	12	125431371	125473668	576372	1.5	9.3	0.37	266
N:CNVR:12q24.32:chr12:128021000:128021999::	chr12:128,021,000-128,021,999 (100kb, 12q24.32)	CNVR	12	128021000	128021999	N:GEXP:DHX37:chr12:125431371:125473668:-:57647	DHX37	GEXP	12	125431371	125473668	2547332	1.4	9.3	0.368	266
N:CNVR:12q24.32:chr12:126923000:127372999::	chr12:126,923,000-127,372,999 (450Mb, 12q24.32)	CNVR	12	126923000	127372999	N:GEXP:DHX37:chr12:125431371:125473668:-:57647	DHX37	GEXP	12	125431371	125473668	1449332	1.3	9.1	0.365	266
N:CNVR:BC032874:chr12:127374000:127527999::	chr12:127,374,000-127,527,999 (154Mb, BC032874)	CNVR	12	127374000	127527999	N:GEXP:DHX37:chr12:125431371:125473668:-:57647	DHX37	GEXP	12	125431371	125473668	1900332	1.1	9	0.363	266
N:CNVR:BC032874:chr12:127528000:128020999::	chr12:127,528,000-128,020,999 (493Mb, BC032874)	CNVR	12	127528000	128020999	N:GEXP:DHX37:chr12:125431371:125473668:-:57647	DHX37	GEXP	12	125431371	125473668	2054332	1.2	9	0.364	266
N:CNVR:12q24.31:chr12:121450000:121640999::	chr12:121,450,000-121,640,999 (191Mb, 12q24.31)	CNVR	12	121450000	121640999	N:GEXP:DHX37:chr12:125431371:125473668:-:57647	DHX37	GEXP	12	125431371	125473668	3790372	1.1	8.9	0.361	266
N:CNVR:12q24.32:chr12:127373000:127373999::	chr12:127,373,000-127,373,999 (100kb, 12q24.32)	CNVR	12	127373000	127373999	N:GEXP:DHX37:chr12:125431371:125473668:-:57647	DHX37	GEXP	12	125431371	125473668	1899332	1	8.8	0.36	266
N:CNVR:12q24:chr12:119511000:120862999::	chr12:119,511,000-120,862,999 (1bp, 12q24)	CNVR	12	119511000	120862999	N:GEXP:DHX37:chr12:125431371:125473668:-:57647	DHX37	GEXP	12	125431371	125473668	4568372	0.9	8.7	0.357	266
N:CNVR:12q24.21:chr12:115198000:115206999::	chr12:115,198,000-115,206,999 (9Mb, 12q24.21)	CNVR	12	115198000	115206999	N:GEXP:DHX37:chr12:125431371:125473668:-:57647	DHX37	GEXP	12	125431371	125473668	10224372	0.8	8.6	0.355	266
N:CNVR:12q24.2:chr12:117475000:119510999::	chr12:117,475,000-119,510,999 (2bp, 12q24.2)	CNVR	12	117475000	119510999	N:GEXP:DHX37:chr12:125431371:125473668:-:57647	DHX37	GEXP	12	125431371	125473668	5920372	0.8	8.6	0.355	266
N:CNVR:12q24.33:chr12:129474000:131512999::	chr12:129,474,000-131,512,999 (2bp, 12q24.33)	CNVR	12	129474000	131512999	N:GEXP:DHX37:chr12:125431371:125473668:-:57647	DHX37	GEXP	12	125431371	125473668	4000332	0.8	8.6	0.355	266
N:CNVR:12q24.31:chr12:120863000:120863999::	chr12:120,863,000-120,863,999 (100kb, 12q24.31)	CNVR	12	120863000	120863999	N:GEXP:DHX37:chr12:125431371:125473668:-:57647	DHX37	GEXP	12	125431371	125473668	4567372	0.7	8.5	0.353	266
N:CNVR:12q24.2:chr12:115207000:117462999::	chr12:115,207,000-117,462,999 (2bp, 12q24.2)	CNVR	12	115207000	117462999	N:GEXP:DHX37:chr12:125431371:125473668:-:57647	DHX37	GEXP	12	125431371	125473668	7968372	0.7	8.5	0.353	266
N:CNVR:TBX3:chr12:114883000:115197999::	chr12:114,883,000-115,197,999 (315Mb, TBX3)	CNVR	12	114883000	115197999	N:GEXP:DHX37:chr12:125431371:125473668:-:57647	DHX37	GEXP	12	125431371	125473668	10233372	0.6	8.4	0.352	266
N:CNVR:GPR133:chr12:131514000:131644999::	chr12:131,514,000-131,644,999 (131Mb, GPR133)	CNVR	12	131514000	131644999	N:GEXP:DHX37:chr12:125431371:125473668:-:57647	DHX37	GEXP	12	125431371	125473668	6040332	0.6	8.4	0.351	266
N:CNVR:GPR133:chr12:131513000:131513999::	chr12:131,513,000-131,513,999 (100kb, GPR133)	CNVR	12	131513000	131513999	N:GEXP:DHX37:chr12:125431371:125473668:-:57647	DHX37	GEXP	12	125431371	125473668	6039332	0.6	8.4	0.35	266
N:CNVR:12q24.33:chr12:131645000:131646999::	chr12:131,645,000-131,646,999 (2Mb, 12q24.33)	CNVR	12	131645000	131646999	N:GEXP:DHX37:chr12:125431371:125473668:-:57647	DHX37	GEXP	12	125431371	125473668	6171332	0.5	8.3	0.35	266
N:CNVR:12q24.21:chr12:114773000:114873999::	chr12:114,773,000-114,873,999 (101Mb, 12q24.21)	CNVR	12	114773000	114873999	N:GEXP:DHX37:chr12:125431371:125473668:-:57647	DHX37	GEXP	12	125431371	125473668	10557372	0	7.8	0.338	266
N:CNVR:12q24:chr12:109789000:114770999::	chr12:109,789,000-114,770,999 (5bp, 12q24)	CNVR	12	109789000	114770999	N:GEXP:DHX37:chr12:125431371:125473668:-:57647	DHX37	GEXP	12	125431371	125473668	10660372	0	7.8	0.338	266
N:CNVR:12q24.21:chr12:114874000:114882999::	chr12:114,874,000-114,882,999 (9Mb, 12q24.21)	CNVR	12	114874000	114882999	N:GEXP:DHX37:chr12:125431371:125473668:-:57647	DHX37	GEXP	12	125431371	125473668	10548372	0	7.8	0.339	266
N:CNVR:12q24.33:chr12:131647000:133161000::	chr12:131,647,000-133,161,000 (2bp, 12q24.33)	CNVR	12	131647000	133161000	N:GEXP:DHX37:chr12:125431371:125473668:-:57647	DHX37	GEXP	12	125431371	125473668	6173332	0	7.7	0.337	266
N:CNVR:FBXW8:chr12:117463000:117474999::	chr12:117,463,000-117,474,999 (12Mb, FBXW8)	CNVR	12	117463000	117474999	N:GEXP:DHX37:chr12:125431371:125473668:-:57647	DHX37	GEXP	12	125431371	125473668	7956372	0	7.6	0.334	266
N:GEXP:DHX37:chr12:125431371:125473668:-:57647	DHX37	GEXP	12	125431371	125473668	C:SAMP:SKCM-All_Metastases_mRNAseq_CNMF_3:::::	SKCM-All_Metastases_mRNAseq_CNMF_3	SAMP				500000000	1.2	7.5		266
N:CNVR:FOXN4:chr12:109712000:109718999::	chr12:109,712,000-109,718,999 (7Mb, FOXN4)	CNVR	12	109712000	109718999	N:GEXP:DHX37:chr12:125431371:125473668:-:57647	DHX37	GEXP	12	125431371	125473668	15712372	0	6.9	0.318	266
N:CNVR:12q24.11:chr12:109788000:109788999::	chr12:109,788,000-109,788,999 (100kb, 12q24.11)	CNVR	12	109788000	109788999	N:GEXP:DHX37:chr12:125431371:125473668:-:57647	DHX37	GEXP	12	125431371	125473668	15642372	0	6.9	0.318	266
N:CNVR:FOXN4:chr12:109719000:109787999::	chr12:109,719,000-109,787,999 (69Mb, FOXN4)	CNVR	12	109719000	109787999	N:GEXP:DHX37:chr12:125431371:125473668:-:57647	DHX37	GEXP	12	125431371	125473668	15643372	0	6.9	0.318	266
N:CNVR:12q24.11:chr12:108362000:109711999::	chr12:108,362,000-109,711,999 (1bp, 12q24.11)	CNVR	12	108362000	109711999	N:GEXP:DHX37:chr12:125431371:125473668:-:57647	DHX37	GEXP	12	125431371	125473668	15719372	0	6.7	0.311	266
N:CNVR:12q23.2:chr12:101601000:103680999::	chr12:101,601,000-103,680,999 (2bp, 12q23.2)	CNVR	12	101601000	103680999	N:GEXP:DHX37:chr12:125431371:125473668:-:57647	DHX37	GEXP	12	125431371	125473668	21750372	0	6.5	0.309	266
N:CNVR:12q23.3:chr12:108358000:108361999::	chr12:108,358,000-108,361,999 (4Mb, 12q23.3)	CNVR	12	108358000	108361999	N:GEXP:DHX37:chr12:125431371:125473668:-:57647	DHX37	GEXP	12	125431371	125473668	17069372	0	6.5	0.307	266
N:CNVR:12q23.3:chr12:105715000:108357999::	chr12:105,715,000-108,357,999 (3bp, 12q23.3)	CNVR	12	105715000	108357999	N:GEXP:DHX37:chr12:125431371:125473668:-:57647	DHX37	GEXP	12	125431371	125473668	17073372	0	6.5	0.308	266
N:CNVR:12q23.1:chr12:101280000:101596999::	chr12:101,280,000-101,596,999 (317Mb, 12q23.1)	CNVR	12	101280000	101596999	N:GEXP:DHX37:chr12:125431371:125473668:-:57647	DHX37	GEXP	12	125431371	125473668	23834372	0	6.5	0.308	266
N:CNVR:ANO4:chr12:101278000:101279999::	chr12:101,278,000-101,279,999 (2Mb, ANO4)	CNVR	12	101278000	101279999	N:GEXP:DHX37:chr12:125431371:125473668:-:57647	DHX37	GEXP	12	125431371	125473668	24151372	0	6.4	0.306	266
N:CNVR:12q21.3:chr12:86517000:90259999::	chr12:86,517,000-90,259,999 (4bp, 12q21.3)	CNVR	12	86517000	90259999	N:GEXP:DHX37:chr12:125431371:125473668:-:57647	DHX37	GEXP	12	125431371	125473668	35171372	0	6.4	0.306	266
N:CNVR:12q23.1:chr12:97111000:101277999::	chr12:97,111,000-101,277,999 (4bp, 12q23.1)	CNVR	12	97111000	101277999	N:GEXP:DHX37:chr12:125431371:125473668:-:57647	DHX37	GEXP	12	125431371	125473668	24153372	0	6.4	0.304	266
N:CNVR:12q23:chr12:103681000:104846999::	chr12:103,681,000-104,846,999 (1bp, 12q23)	CNVR	12	103681000	104846999	N:GEXP:DHX37:chr12:125431371:125473668:-:57647	DHX37	GEXP	12	125431371	125473668	20584372	0	6.3	0.302	266
N:CNVR:12q21:chr12:79145000:83477999::	chr12:79,145,000-83,477,999 (4bp, 12q21)	CNVR	12	79145000	83477999	N:GEXP:DHX37:chr12:125431371:125473668:-:57647	DHX37	GEXP	12	125431371	125473668	41953372	0	6.2	0.299	266
N:CNVR:12q24.33:chr12:133155339:133851895::SKCM-All_Samples_Gistic_ROI_r_del	12q24.33 Deletion (Gistic, continuous)	CNVR	12	133155339	133851895	N:GEXP:DHX37:chr12:125431371:125473668:-:57647	DHX37	GEXP	12	125431371	125473668	7681671	0	6.1	0.296	266
N:CNVR:MGAT4C:chr12:86516000:86516999::	chr12:86,516,000-86,516,999 (100kb, MGAT4C)	CNVR	12	86516000	86516999	N:GEXP:DHX37:chr12:125431371:125473668:-:57647	DHX37	GEXP	12	125431371	125473668	38914372	0	6.1	0.297	266
